# Supplementary material for: Neural correlates and determinants of approach–avoidance conflict in the prelimbic prefrontal cortex
Source: eLife. 2021 Dec 16;10:e74950. doi: 10.7554/eLife.74950 (PMC8853658; doi:10.7554/eLife.74950)
Supplement: Figure 1—figure supplement 1—source data 1. [file elife-74950-fig1-figsupp1-data1.xlsx]

## Sheet: A - Avg discriminability
	Pressers	Pressers	Pressers	Pressers	Pressers	Pressers	Pressers	Pressers	Pressers	Pressers	Pressers	Pressers	Pressers	Pressers	Pressers	Pressers	Pressers	Pressers	Pressers	Pressers	Pressers	Pressers	Pressers	Pressers	Pressers	Pressers	Pressers	Pressers	Pressers	Pressers	Pressers	Pressers	Pressers	Non-pressers	Non-pressers	Non-pressers	Non-pressers	Non-pressers	Non-pressers	Non-pressers	Non-pressers	Non-pressers	Non-pressers	Non-pressers	Non-pressers	Non-pressers	Non-pressers	Non-pressers	Non-pressers
Early	0.241379	-0.021021	-0.0882353	-0.385475	-0.274131	-0.417323	-0.284211	0.047619	-0.153061	-0.220447	-0.326271	-0.181818	-0.155963	-0.641026	-0.228916	-0.297297	-0.0736842	0.060241	-0.555556	-0.118812	-0.10084	-0.363636	-0.270175	-0.211896	-0.34188	-0.2	0.6	-0.0140845	-0.347368	-0.276923	-0.296875	0.0493827	0.44086	-0.32131	-0.0838817	-0.28382	-0.12369	-0.0869156	-0.220079	-0.208132	-0.18879	-0.122769	-0.34561	-0.0992496	-0.0531831	-0.0994511	-0.0777731	0.0634143	-0.153755
Late	0.77931	-0.0167598	0.575758	0.512605	0.606557	0.351032	0.609195	0.647727	0.35	0.520548	0.411111	0.913386	0.460177	0.518987	-0.211538	0.534247	0.860465	0.459677	0.954545	0.657534	0.503546	0.522634	0.847826	0.488789	0.494253	0.74375	0.134921	0.254237	0.889571	0.108571	0.821782	0.12	0.42723	0.497486	0.153139	0.448941	0.477	0.503093	0.670303	0.532683	0.547273	0.50013	0.419152	0.741116	0.701408	0.578113	0.600578	0.68245	0.722899
[truncated: 8 more columns]

## Sheet: B - Avg Presses
	Pressers	Pressers	Pressers	Pressers	Pressers	Pressers	Pressers	Pressers	Pressers	Pressers	Pressers	Pressers	Pressers	Pressers	Pressers	Pressers	Pressers	Pressers	Pressers	Pressers	Pressers	Pressers	Pressers	Pressers	Pressers	Pressers	Pressers	Pressers	Pressers	Pressers	Pressers	Pressers	Pressers	Non-pressers	Non-pressers	Non-pressers	Non-pressers	Non-pressers	Non-pressers	Non-pressers	Non-pressers	Non-pressers	Non-pressers	Non-pressers	Non-pressers	Non-pressers	Non-pressers	Non-pressers	Non-pressers
First Day - Cue OFF	21.25	9.58333	14.6667	10.5	13	9.91667	0	9.66667	9.5	8.66667	18.1667	3.16667	12.3333	13.25	6	5.25	8.75	2.16667	0.166667	5.91667	10.9167	1.25	15.0833	13.5833	13.0833	17	1.91667	6	10.6667	6.91667	6.91667	6.41667	2.16667	7.33333	14.1667	12.3333	10.3333	13.75	15	5.08333	5	9.41667	15.9167	26.0833	7.58333	5.25	2.66667	4.25	4
First Day - Cue ON	12.6667	6.41667	14.3333	8.33333	13.5	6	0	7.25	8.58333	3.25	8.16667	3.66667	8.91667	10.5	6.66667	7.33333	12.8333	5.58333	0.166667	6.33333	8.91667	0.583333	8.66667	8.83333	6.41667	11.3333	7.66667	5.83333	5.16667	3.91667	3.75	7.08333	5.58333	12	13.5833	10.3333	4.58333	7.83333	6.16667	2.83333	5.5	6.91667	10.1667	13.25	5.25	3.83333	0.583333	2.66667	2.16667
Last Day - Cue OFF	3.41667	4.33333	1.58333	10.8333	3.08333	3.91667	6.41667	4.91667	4.75	2.08333	1	4	4.08333	3.75	0.75	0.416667	2.41667	5.08333	0.416667	4.33333	5.83333	4.83333	2.33333	4.75	5.5	3.41667	9.08333	7.33333	0.75	6.5	0.75	4.58333	5.08333	2.66667	15.1667	3.5	4.83333	5	9.16667	2.83333	2.58333	4.33333	5.83333	8.83333	0.916667	5.08333	1.58333	5.25	1.41667
Last Day - Cue ON	21.5	13.3333	20.4167	19.75	19.9167	13.4167	20.25	21.25	17.0833	11.75	15.1667	22.5833	17.6667	14.5833	13.0833	6.25	19.75	12.6667	2.75	14.9167	17.6667	15.4167	28.3333	13.8333	16.25	23.25	11.9167	12.3333	12.8333	8.08333	7.66667	5.83333	12.6667	21.5	14.6667	13	15	20.4167	19.0833	11.6667	12.0833	9	18.5	21.1667	20.25	13.75	5	3.41667	4.66667
[truncated: 17 more columns]

## Sheet: C - Presses
	Pressers	Pressers	Pressers	Pressers	Pressers	Pressers	Pressers	Pressers	Pressers	Pressers	Pressers	Pressers	Pressers	Pressers	Pressers	Pressers	Pressers	Pressers	Pressers	Pressers	Pressers	Pressers	Pressers	Pressers	Pressers	Pressers	Pressers	Pressers	Pressers	Pressers	Pressers	Pressers	Pressers		non pressers	non pressers	non pressers	non pressers	non pressers	non pressers	non pressers	non pressers	non pressers	non pressers	non pressers	non pressers	non pressers	non pressers	non pressers
	1X2	2X2	4X2	5X2	6X2	7X2	8X2	6M2	8T2	5M2	1O1	1G2	1J2	4G2	5Q3	7Q3	8Q3	9Q3	10Q3	9Z2	6G3	8G3	9G3	10G3	2R2	3Z2	6Z2	2G3	3F3	4F3	7F3	9F3	10T3		3M2	10T2	3J2	4J2	9F2	7B2	6B2	7Z2	8Z2	10Z2	3U3	6R2	7R2	1Z2	1F3
Hab.	2	4	10	8	4	8	6	16	12	6	22	12	16	16	8	14	10	6	14	10	12	10	12	6	16	18	4	20	14	12	14	16	8		4	10	16	6	8	18	6	14	16	10	12	14	14	22	10
Cue 1	8	4	0	12	6	12	12	14	14	10	20	14	12	10	16	16	8	6	4	16	10	16	4	8	0	8	12	20	14	10	18	14	8		2	6	12	8	16	10	0	0	10	10	12	14	14	20	12
Cue 2	6	10	6	14	4	12	10	18	8	16	20	14	4	16	18	14	6	6	8	16	18	14	12	16	0	22	8	16	18	16	16	24	0		4	12	4	10	20	22	0	0	10	8	16	20	14	18	8
Cue 3	6	0	0	14	0	8	2	16	16	0	16	16	10	12	20	4	8	4	2	12	12	0	8	0	0	10	2	2	10	16	18	12	10		2	10	10	12	12	0	4	0	16	2	0	8	0	16	0
Cue 4	0	0	6	14	0	10	0	14	12	0	8	16	4	2	14	0	8	4	4	8	2	14	24	0	0	18	0	0	2	10	0	2	2		2	4	4	0	0	0	4	0	0	2	10	0	0	8	0
Cue 5	0	0	0	6	0	8	0	18	10	0	18	16	10	4	18	0	10	6	14	12	0	22	10	0	0	18	2	0	0	14	2	2	12		4	0	10	0	0	0	2	0	0	8	0	0	0	18	0
[truncated: 5 more columns]

## Sheet: D - Freezing
	Pressers (N=33)	Pressers (N=33)	Pressers (N=33)	Pressers (N=33)	Pressers (N=33)	Pressers (N=33)	Pressers (N=33)	Pressers (N=33)	Pressers (N=33)	Pressers (N=33)	Pressers (N=33)	Pressers (N=33)	Pressers (N=33)	Pressers (N=33)	Pressers (N=33)	Pressers (N=33)	Pressers (N=33)	Pressers (N=33)	Pressers (N=33)	Pressers (N=33)	Pressers (N=33)	Pressers (N=33)	Pressers (N=33)	Pressers (N=33)	Pressers (N=33)	Pressers (N=33)	Pressers (N=33)	Pressers (N=33)	Pressers (N=33)	Pressers (N=33)	Pressers (N=33)	Pressers (N=33)	Pressers (N=33)		Non-pressers (N=20)	Non-pressers (N=20)	Non-pressers (N=20)	Non-pressers (N=20)	Non-pressers (N=20)	Non-pressers (N=20)	Non-pressers (N=20)	Non-pressers (N=20)	Non-pressers (N=20)	Non-pressers (N=20)	Non-pressers (N=20)	Non-pressers (N=20)	Non-pressers (N=20)	Non-pressers (N=20)	Non-pressers (N=20)
	1X2	2X2	4X2	5X2	6X2	7X2	8X2	6M2	8T2	5M2	1O1	1G2	1J2	4G2	5Q3	7Q3	8Q3	9Q3	10Q3	9Z2	6G3	8G3	9G3	10G3	2R2	3Z2	6Z2	2G3	3F3	4F3	7F3	9F3	10T3		3M2	10T2	3J2	4J2	9F2	7B2	6B2	7Z2	8Z2	10Z2	3U3	6R2	7R2	1Z2	1F3
Hab.	23	0	0	0	0	0	7.33333	0	0	0	0	0	40	26.3333	0	0	0	3.66667	0	0	0	0	0	9.33333	6	12.3333	4.66667	3.33333	0	0	6.66667	0	0		0	5	54.6667	3.66667	0	4.33333	73.3333	0	0	0	0	34	9	72.6667	17
1	33.3333	22.3333	0	28	4.33333	20.3333	4.33333	10.6667	7.33333	0	0	0	37	0	3.66667	0	0	33.3333	0	6.33333	0	5	0	22.3333	25.6667	11.6667	13.6667	5.33333	7	0	0	20	9.66667		34	22.3333	3.66667	6.66667	0	9.33333	36	3.66667	0	0	0	50.6667	71.6667	55.6667	24
2	36.3333	11	6	8.33333	61.6667	47.3333	62.3333	12.6667	13.6667	18.3333	45.6667	0	34	4.66667	6.33333	27	0	66.6667	22.6667	6.66667	0	40.3333	19.3333	70	57.3333	35.3333	8.33333	36	37	0	52.6667	23.3333	38		71	65	63	41.3333	34.6667	25.3333	62	40	51.3333	18	44.3333	11	23.6667	81.3333	63.3333
3	79.6667	71	35.3333	70.6667	92	78.3333	52.3333	24	0	37.3333	16.6667	0	0	10.3333	46.6667	66.3333	11.6667	68.3333	16	44.3333	9.33333	72.6667	23	88	49.6667	62	28	39	78.3333	25.3333	63.3333	72	23.6667		66.3333	81.3333	73.6667	53.6667	30.6667	33.3333	46.6667	90.3333	55.3333	13	84	37.6667	5.66667	59.3333	89.3333
4	70.3333	76.6667	64.3333	48	83.3333	61.6667	65.6667	45	39.6667	75	10	5	20.6667	29.3333	5	83	14	47.6667	11.3333	31.3333	85.3333	27.6667	50	70	57.6667	17	76	32.6667	63.3333	21.3333	28	27	27.3333		40	48.6667	83.6667	73.3333	87.6667	70	39.6667	92.3333	43	24.6667	70.3333	34	30	17.6667	94
5	39.6667	68.6667	34.3333	37.3333	86.3333	66.3333	92.3333	72	48	62.3333	61	60.6667	15.6667	43.3333	34.6667	74.3333	30	52.3333	3.66667	57	55	86.6667	39.3333	81.6667	81.3333	39.6667	38.3333	59.6667	77.3333	76	71.6667	89	46.3333		34.6667	30.3333	72.3333	69	75.6667	80	5	87.3333	62	63.6667	36.6667	40	16.6667	71.3333	48
[truncated: 5 more columns]

## Sheet: E - Max Speed
	Pressers (N=33)	Pressers (N=33)	Pressers (N=33)	Pressers (N=33)	Pressers (N=33)	Pressers (N=33)	Pressers (N=33)	Pressers (N=33)	Pressers (N=33)	Pressers (N=33)	Pressers (N=33)	Pressers (N=33)	Pressers (N=33)	Pressers (N=33)	Pressers (N=33)	Pressers (N=33)	Pressers (N=33)	Pressers (N=33)	Pressers (N=33)	Pressers (N=33)	Pressers (N=33)	Pressers (N=33)	Pressers (N=33)	Pressers (N=33)	Pressers (N=33)	Pressers (N=33)	Pressers (N=33)	Pressers (N=33)	Pressers (N=33)	Pressers (N=33)	Pressers (N=33)	Pressers (N=33)	Pressers (N=33)		Non-pressers (N=20)	Non-pressers (N=20)	Non-pressers (N=20)	Non-pressers (N=20)	Non-pressers (N=20)	Non-pressers (N=20)	Non-pressers (N=20)	Non-pressers (N=20)	Non-pressers (N=20)	Non-pressers (N=20)	Non-pressers (N=20)	Non-pressers (N=20)	Non-pressers (N=20)	Non-pressers (N=20)	Non-pressers (N=20)
1	0.501	0.536	0.545	1.231	0.368	0.366	1.196	0.332	0.286	0.549	0.532	0.25	0.335	0.519	0.346	0.545	0.463	0.391	0.991	1.013	0.024	0.081	0.055	0.043	0.141	1.15	0.443	0.05	0.046	0.078	0.022	0.025	0.049		0.335	0.498	0.532	0.347	0.804	0.422	0.34	1.172	0.484	0.833	0.031	0.854	0.325	0.497	0.04
2	0.305	0.541	0.293	0.515	0.357	0.53	0.367	0.297	0.217	0.348	0.265	0.337	0.849	0.346	0.826	0.872	0.443	0.261	0.467	1.154	0.037	0.079	0.025	0.025	0.118	0.86	0.547	0.031	0.063	0.041	0.052	0.059	0.051		0.341	0.512	0.402	0.389	0.416	0.382	0.591	0.242	0.529	0.451	0.072	1.028	0.451	0.786	0.014
3	0.232	0.371	1.157	0.6	0.289	0.654	0.719	0.402	0.389	0.368	0.364	0.239	0.15	0.22	0.533	0.533	0.655	0.703	0.654	0.659	0.077	0.032	0.049	0.051	0.093	1.387	0.413	0.029	0.043	0.066	0.044	0.059	0.036		0.348	0.438	0.198	0.436	0.349	0.558	0.616	0.618	0.682	0.27	0.09	0.393	0.614	0.57	0.033
4	0.037	0.008	0.146	0.38	0.177	0.165	0.044	0.409	0.37	0.405	0.452	0.504	0.259	0.668	0.969	0.204	0.456	0.536	0.692	0.706	0.024	0.053	0.04	0.025	0.083	0.709	0.415	0.037	0.03	0.034	0.06	0.047	0.055		0.427	0.463	0.401	0.33	0.258	0.372	0.692	0.745	0.583	0.384	0.033	0.486	0.527	0.458	0.032
5	0.236	0.761	0.565	0.489	0.24	0.553	0.316	0.358	0.284	0.491	0.287	0.395	0.366	0.349	0.263	0.797	0.046	1.472	0.994	0.299	0.134	0.023	0.02	0.11	0.057	1.921	0.511	0.016	0.037	0.112	0.037	0.028	0.048		0.454	0.764	0.759	0.405	0.214	0.755	0.244	0.203	0.508	0.331	0.08	0.911	0.694	0.473	0.101
[truncated: 5 more columns]

## Sheet: F - Odor inv time
	Pressers																																Non-pressers
Pre-conditioning	6.16071	2.73214	1.92857	6.69643	6.64286	4.23214	8.08929	10.7143	4.875	6.58929	9.42857	3.80357	9.85714	6.91071	13.6071	6.21429	4.55357	10.1786	12.8036	12.6429	2.51786	6.16071	7.33929	7.39286	8.57143	6.96429	6.13393	6	6.64286	10.4464	3.58929	8.46429	12.0536	6.05357	5.89286	0	11.8929	9.375	5.25	9.85714	2.73214	11.625	3.58929	5.35714	9.58929	8.73214	5.78571	12.8036	0.803571
[truncated: 3 more columns]

## Sheet: G - Latency press
	Pressers																																Non-pressers
Pre-conditioning	2.5	12.6	1.6	2.8	18.5	2.6	25.7	4.5	6.7	9.8	5.4	3.1	1.4	3.5	1.4	6.3	9.6	1.8	11.5	6	2.2	5.6	5.7	0.8	3.6	6.5	7.6	4.2	5.4	3.7	4.8	6	14.8	7.1	10.4	4.6	1.6	3.9	9.1	7.2	2.7	5.4	6.6	4.8	5.7	2.6	4.3	2	3.4
[truncated: 3 more columns]

## Sheet: H - Contextual freezing
	Pressers (N=33)																																	Non-pressers (N=20)
	1O1	1G2	5Q3	7Q3	8Q3	9Q3	10Q3	1X2	2X2	4X2	5X2	6X2	7X2	8X2	6M2	8T2	5M2	4G2	6G3	8G3	9G3	10G3	2G3	3F3	4F3	7F3	9F3	2R2	10T3	3Z2	6Z2	9Z2		4J2	9F2 (9G2)	7B2	6B2	3M2	10T2	3J2	1F3	1G3	5F3	6R2	7R2	1U3	2U3	3U3	9T3
Hab.	0	0	0	0	0	0	0	0.333333	0	5.66667	0	0	0	5	0	0	0	0	4.66667	3.33333	2	35	0	9.33333	2	21.6667	12.6667	0	7.66667	0	35	8		0	0	0	66	0	8	45.3333	2	0	0	0	0	0	0	2.33333	2
1	0	0	28	0	0	46.6667	0	0	0	7	0	29.3333	0	10.6667	3.66667	11.3333	0	12.3333	26	4	2	85.3333	2	34.6667	2.33333	8.66667	26.3333	4.33333	13.3333	31.6667	47	0		0	3.66667	4	39.3333	4.33333	0	9.66667	33	5	0	4.33333	0	20.6667	2	11.6667	27
2	0	10.3333	8.66667	0	0	37	0	0	0	5.33333	3.66667	0	0	11	4.33333	7.33333	0	18	32.6667	7	2	46	18.6667	31.6667	32	26.6667	16.6667	46.3333	64	15	12.3333	22		26	0	5	73	0	24.3333	48	36.3333	19	3	23	29	13	8.33333	13.3333	46
3	6.33333	46.6667	16.3333	33.3333	5.33333	75	0	20.3333	17	30.6667	4.66667	73.6667	0	5.33333	5.33333	9	52.3333	10	36.3333	50	19	91.6667	28	19.3333	20	89	40.3333	49.6667	42.3333	32.3333	52	26.3333		41.6667	0	74.3333	69.6667	37.3333	38.6667	84.3333	58.6667	19.3333	33	37.3333	78.6667	33	20.6667	65.3333	71
4	10.3333	47	4	93	4.33333	74	0	86.6667	98	58.6667	67.3333	64	13.6667	57	5.66667	37.6667	44	70.3333	60.6667	84.6667	72.3333	100	59.6667	49.3333	52.3333	82.3333	96	68	75.6667	61.3333	82.3333	62.6667		37	91	80.6667	87.6667	46.3333	21.6667	94	100	85.3333	98.6667	69.6667	71	81.6667	62	85.3333	90.6667
5	0	26	4.33333	55	3.33333	60	0	25	68	90.3333	14.3333	52.3333	0	35	0	21.6667	33.6667	18.6667	22.6667	49	13	90	36.3333	77.3333	23.3333	78.3333	85.6667	37.6667	8	32.3333	70.3333	49		95	8.33333	41.6667	66	14	25.6667	99.3333	27.6667	72.3333	36	40	74	88	36.3333	74	71
[truncated: 4 more columns]

## Sheet: I - Contextual freezing
	Pressers																																Non-pressers
Pre-conditioning	0	0	0	0	0	0	0	1.6	0	0	0	0	0	0	0	0	0	0	0	0.8	0	7.2	0	0.5	2.1	0	0.6	1.5	1	0	0.7	0	0	0	0	0	0	1.4	0	1.6	0	0.6	0	0	6	2.6	2.8	0	1.5
[truncated: 3 more columns]

## Sheet: J - Freezing
	Pressers (N=33)																																	Non-pressers (N=20)
Time	1O1	1G2	5Q3	7Q3	8Q3	9Q3	10Q3	1X2	2X2	4X2	5X2	6X2	7X2	8X2	6M2	8T2	5M2	4G2 (3G2?)	6G3	8G3	9G3	10G3	2G3	3F3	4F3	7F3	9F3	2R2	10T3	3Z2	6Z2	9Z2		4J2	9F2 (9G2)	7B2	6B2	3M2	10T2	3J2	1F3	1G3	5F3	6R2	7R2	1U3	2U3	3U3	9T3
1	0	2.66667	6.33333	17.1667	6.16667	0	2.66667	40.3333	22.3333	0	7.16667	4.66667	9	44.5	0	0	12.3333	0	7.33333	35.6667	25.3333	21.1667	24.3333	37	55.6667	46.6667	21.8333	0	18	22.5	24.1667	32.6667		22.1667	33.6667	20.5	7.16667	21.6667	52.6667	10.1667	37.5	22	35.3333	0	7.5	3.83333	3.83333	56.1667	38.1667
2	14	16.8333	15.1667	11.1667	0	0	10.5	48.8333	37.1667	0	32.1667	10.3333	0	21.5	0	2.16667	5.83333	0	1.16667	26.8333	18	18.3333	11.8333	27.5	47.3333	37.1667	32	0	32.3333	9	41.8333	23.6667		28.8333	14.5	0	0	14.5	9.33333	23.3333	44	22.1667	51.1667	11	2.5	9.5	20.6667	90.3333	23.5
3	32.5	16	5.66667	5	0.833333	0	12.1667	21.5	14	3.33333	11.8333	12.8333	2	4.33333	11.6667	5.66667	0	0	7.16667	25.8333	11.1667	49.3333	1	13.3333	37.3333	43.5	43.8333	0	36	18	28	24		11	15.1667	1.83333	5.5	14.3333	25.6667	24.8333	50.1667	31.1667	43.1667	5.33333	0	59.1667	26.5	95	7.5
4	16.8333	9.33333	12	0	25	0	15.1667	10.1667	58	4.16667	31.6667	9.16667	0	0	0	3.5	8.66667	0	7.83333	10.1667	13.6667	46.1667	7.33333	0	68.3333	33.3333	45.8333	0	30.1667	50.5	45	26.1667		19.8333	25.3333	6.33333	2	12.3333	9.16667	16.6667	39.3333	49.5	14.8333	2	0	69	15.6667	96.3333	10.6667
5	46.3333	15	0	7.16667	0	2.33333	4.66667	10.8333	33.8333	0	27.6667	2.33333	0	0	17.1667	8.16667	1.83333	0	2.66667	31.8333	19.6667	33	9	7	24	53.5	24	0	7.66667	43.3333	38.5	56.5		64.8333	23.3333	11.6667	0	14	3.83333	25.3333	52.3333	19.3333	33.6667	6.5	0	37.1667	32.3333	89	25.5
6	18.1667	10.5	3.5	13.8333	0	2	2.16667	6.66667	0	0	11.5	0	0	2	25.3333	7	3.83333	0	3.5	27	13.3333	59.5	21.5	2.5	61.8333	22.5	23.6667	0	21.8333	14.8333	12.1667	34.8333		81.1667	9.83333	14.3333	0	12.1667	5.66667	20.1667	42.6667	17.1667	23	34.6667	0	13.8333	55.5	89.8333	13.6667
7	16	11.6667	0	7.33333	0	0	2.16667	16.5	2.16667	7	20.3333	5	0	0	4.5	2.5	2.83333	0	6.33333	37.5	32.1667	11.6667	0.833333	4.33333	79.5	20	7.66667	0	22.3333	19.3333	4	22.8333		53.6667	20.6667	25.5	3.83333	42.3333	7.33333	27.5	57.1667	53.8333	46.5	15.1667	5.33333	13.6667	33.8333	92.3333	12.6667
8	0	0	15.3333	4.16667	0	0	0	3.33333	4.33333	5.83333	7.16667	17.3333	0	2	26.8333	12.3333	5.33333	0	4.5	12.3333	6.5	6.33333	3.66667	0	48.5	53.6667	10.8333	0	5.5	1.33333	10.3333	7.83333		38.6667	11.1667	12.1667	0	12.6667	33	36.1667	37.8333	55.5	12.6667	1.83333	0	6.83333	68.5	87.1667	26.5
9	1.66667	0	11.8333	12	0	0	0	10	5.5	12.8333	29.3333	1.83333	0	21.8333	28.8333	4.83333	2.33333	0	2.16667	17.6667	14	12.8333	16.5	5.83333	81.6667	49.1667	8	0	1.5	2.66667	7.16667	23.1667		22.8333	15.5	4.33333	8.66667	19.6667	46	46	31.6667	34.8333	55.6667	11.8333	0	15.8333	65.8333	57.8333	11.5
10	0	15	0	0	1.83333	2.16667	0	25.3333	4.5	4	7.33333	6.83333	0	16.3333	5.5	5.66667	5.83333	0	3.5	13	7.66667	32.8333	6.16667	5.16667	74.6667	46.8333	10.8333	5.16667	4.83333	2.66667	16.5	33.5		44	36.3333	6.83333	2.16667	23.3333	57	67	25.1667	16.3333	22.5	6.5	0	4.5	27.5	75.6667	2.5
[truncated: 4 more columns]

[truncated: 2 more sheets: K - Avoidance, L - Approach]
