# Supplementary material for: Neural correlates and determinants of approach–avoidance conflict in the prelimbic prefrontal cortex
Source: eLife. 2021 Dec 16;10:e74950. doi: 10.7554/eLife.74950 (PMC8853658; doi:10.7554/eLife.74950)
Supplement: Figure 1—source data 1. [file elife-74950-fig1-data1.xlsx]

## Sheet: 1B - Freezing OFC
Animal	Hab.	1	2	3	4	5
3M2	0	34	71	66.3333	40	34.6667
10T2	5	22.3333	65	81.3333	48.6667	30.3333
3J2	54.6667	3.66667	63	73.6667	83.6667	72.3333
4J2	3.66667	6.66667	41.3333	53.6667	73.3333	69
9F2	0	0	34.6667	30.6667	87.6667	75.6667
7B2	4.33333	9.33333	25.3333	33.3333	70	80
6B2	73.3333	36	62	46.6667	39.6667	5
1X2	23	33.3333	36.3333	79.6667	70.3333	39.6667
2X2	0	22.3333	11	71	76.6667	68.6667
4X2	0	0	6	35.3333	64.3333	34.3333
5X2	0	28	8.33333	70.6667	48	37.3333
6X2	0	4.33333	61.6667	92	83.3333	86.3333
7X2	0	20.3333	47.3333	78.3333	61.6667	66.3333
8X2	7.33333	4.33333	62.3333	52.3333	65.6667	92.3333
6M2	0	10.6667	12.6667	24	45	72
8T2	0	7.33333	13.6667	0	39.6667	48
5M2	0	0	18.3333	37.3333	75	62.3333
1O1	0	0	45.6667	16.6667	10	61
1G2	0	0	0	0	5	60.6667
1J2	40	37	34	0	20.6667	15.6667
4G2	26.3333	0	4.66667	10.3333	29.3333	43.3333
1K3	0	0	11	0	4.33333	11.3333
2K3	4	0	0	7.33333	9.66667	38
3K3	7.66667	0	10.3333	31	56.3333	55
4K3	0	0	8	51.6667	41	18.6667
9J3	0	0	14.3333	69.6667	87.3333	93.6667
10J3	5.33333	0	18.3333	77.6667	58.3333	71
5Q3	0	3.66667	6.33333	46.6667	5	34.6667
7Q3	0	0	27	66.3333	83	74.3333
8Q3	0	0	0	11.6667	14	30
9Q3	3.66667	33.3333	66.6667	68.3333	47.6667	52.3333
10Q3	0	0	22.6667	16	11.3333	3.66667

## Sheet: 1C - Presses OFC
Animal	Hab.	1	2	3	4	5
3M2	4	2	4	2	2	4
10T2	10	6	12	10	4	0
3J2	16	12	4	10	4	10
4J2	6	8	10	12	0	0
9F2	8	16	20	12	0	0
7B2	18	10	22	0	0	0
6B2	6	0	0	4	4	2
1X2	2	8	6	6	0	0
2X2	4	4	10	0	0	0
4X2	10	0	6	0	6	0
5X2	8	12	14	14	14	6
6X2	4	6	4	0	0	0
7X2	8	12	12	8	10	8
8X2	6	12	10	2	0	0
6M2	16	14	18	16	14	18
8T2	12	14	8	16	12	10
5M2	6	10	16	0	0	0
1O1	22	20	20	16	8	18
1G2	12	14	14	16	16	16
1J2	16	12	4	10	4	10
4G2	16	10	16	12	2	4
1K3	16	12	14	12	8	16
2K3	16	22	18	2	16	0
3K3	18	18	18	18	4	10
4K3	20	16	10	18	2	0
9J3	14	6	2	0	0	0
10J3	8	14	16	10	12	8
5Q3	8	16	18	20	14	18
7Q3	14	16	14	4	0	0
8Q3	10	8	6	8	8	10
9Q3	6	6	6	4	4	6
10Q3	14	4	8	2	4	14

## Sheet: 1D - Latency to Press OFC
Animal	Hab.	1	2	3	4	5
3M2	9.1	10.5	6.6	5.1	21	8.5
10T2	2.3	24.5	30	30	30	28.7
3J2	7.1	3.7	8.4	8	30	30
4J2	14.8	11.1	5.8	8.9	30	30
9F2	3.9	6.6	3.9	4.4	30	30
7B2	1.6	1.4	2.3	30	30	30
6B2	4.6	30	30	8.6	5.3	8.7
1X2	25.7	7.7	9.9	10.2	30	30
2X2	4.5	17.3	8.1	30	30	30
4X2	6.7	30	16.9	30	14.5	30
5X2	9.8	6.7	12	11.1	10.9	16.8
6X2	5.4	12.5	12.6	30	30	30
7X2	3.1	4.5	4.1	12.8	1.3	3.8
8X2	1.4	1.9	4.6	16.4	30	30
6M2	2.6	4.4	1.9	0.9	5.7	6.8
8T2	30	4.2	30	27.6	30	29.5
5M2	18.5	16.4	7.7	30	30	30
1O1	2.5	1.6	4.1	2.8	5.1	2.4
1G2	2.8	3.7	3.2	4.4	5.2	14.1
1J2	6.1	3.6	5.9	1	5.2	2.1
4G2	1.6	3	1.7	6.1	19.5	8.3
1K3	3.4	10.2	5.1	7.8	12.1	9.6
2K3	8.1	1.4	1.3	29.5	14.9	30
3K3	3	2.7	1.4	5.1	9.1	7.2
4K3	3.1	7.1	8.4	3.9	2.1	30
9J3	3.7	7.9	26.3	30	30	30
10J3	8.8	2.4	2.8	11.9	4.1	9
5Q3	3.5	5.5	3.3	0.9	3.4	9.9
7Q3	1.4	1.6	4.7	4	30	30
8Q3	6.3	5.5	2.8	11.1	2.5	1.2
9Q3	9.6	7	5.8	4.4	4.6	4.3
10Q3	1.8	2.7	6.4	7.7	6.3	0.6

## Sheet: 1E - Freezing OF Test
Animal	Reward Phase	Odor Phase	Conflict Phase
3M2	1.33333	18.7	14.7222
10T2	0.25	24.95	41.8472
3J2	3.95833	29.7167	27.8611
4J2	1.56944	38.6833	43.5278
9F2	0.84722	15.3	15.9722
7B2	0.26389	10.35	11.8611
6B2	0.18056	2.95	25.4028
1X2	1.04167	19.35	5.30556
2X2	1.11111	18.1833	9.29167
4X2	0	3.71667	4.26389
5X2	0.58333	18.6333	2.75
6X2	0.72222	7	2.51389
7X2	3.72222	1.1	3.94444
8X2	0.27778	11.25	1.44444
6M2	0.15278	11.9833	14.5
8T2	0	5.16667	4.13889
5M2	0	4.88333	0.58333
1O1	0.52778	14.5667	1.01389
1G2	0	9.73333	1.33333
1J2	0	12.8667	0.20833
4G2	0	0.46667	2.79167
1K3	0.58333	2.83333	0.81944
2K3	0	8.45	0
3K3	0.22222	1.35	0.56944
4K3	0	0.38333	1.05556
9J3	4.72222	4.75	6.58333
10J3	0	1.78333	0.52778
5Q3	2.93056	6.96667	2.25
7Q3	0.55556	7.8	0.52778
8Q3	0.15278	3.36667	2.66667
9Q3	0	0.63333	0.15278
10Q3	0.5	4.93333	2

## Sheet: 1F - Avoidance OF Test
Animal	Reward Phase	Odor Phase	Conflict Phase
3M2	11.6528	82.0333	74.9722
10T2	11.7083	93.35	99.5278
3J2	38.5833	98.4	98.4583
4J2	23.375	88.3833	92.7361
9F2	15.7778	97.5333	100
7B2	9.54167	97.0667	100
6B2	1.04167	99.2167	93.3333
1X2	16.3056	14.6333	13.4583
2X2	26.0139	88.3167	8.90278
4X2	10.4722	70.9833	37.9306
5X2	15.8333	26.4167	8.34722
6X2	6.58333	38.4333	8.625
7X2	26.0972	31.35	38.9444
8X2	11.1111	36.4	14.9583
6M2	11	67.75	66.2778
8T2	28.5417	82.8	47.9444
5M2	6.61111	88.2333	30.3889
1O1	9.31944	55.5	0
1G2	27.0139	91.9833	81.3889
1J2	11.6806	56.2333	17.3333
4G2	17.2917	67	57.5417
1K3	37.6111	82.4	40.4861
2K3	24.0139	95.3667	54.7639
3K3	30.7222	46.55	35.75
4K3	15.375	39.1	37.7639
9J3	29.0139	54.5333	26.2778
10J3	21.9861	26.1667	29.875
5Q3	6.73611	9.55	32.8056
7Q3	7.31944	52.65	36.1806
8Q3	12.1111	2.11667	32.1806
9Q3	0	0	6.29167
10Q3	13.5139	78.1667	34.3611

## Sheet: 1G - Risk Assessment OF Test
Animal	Reward Phase	Odor Phase	Conflict Phase
3M2	0.22222	3.2	3.68056
10T2	1.34722	6.48333	10.2917
3J2	2.51389	2.58333	4.59722
4J2	2.29167	2.2	7.40278
9F2	1.54167	0	0
7B2	0.58333	0	0
6B2	0	0.96667	0
1X2	0	1.6	7.34722
2X2	0.19444	2.58333	3.29167
4X2	0.16667	3.68333	3.43056
5X2	0.5	1.9	1.77778
6X2	0.59722	1.46667	1.01389
7X2	0.13889	1.65	0.22222
8X2	0.29167	1.76667	2.16667
6M2	0	1.05	2.95833
8T2	0	3.56667	6.26389
5M2	0	1.15	7.01389
1O1	0	0	0
1G2	0	0.75	7.51389
1J2	0	2.38333	0
4G2	0.77778	1.71667	9.06944
1K3	0.20833	1.93333	2.19444
2K3	0.31944	3.43333	2.125
3K3	0.25	1.98333	1.72222
4K3	0.19444	1.73333	1.75
9J3	0	1.41667	1.33333
10J3	0	1.43333	1.31944
5Q3	0	2.48333	0.51389
7Q3	0	0.55	0.66667
8Q3	0.19444	3.4	0.56944
9Q3	0	0	0
10Q3	0.33333	2.13333	1.20833

## Sheet: 1H - Approach OF Test
Animal	Reward Phase	Odor Phase	Conflict Phase
3M2	60.0556	7.28333	14.25
10T2	56.375	0	0
3J2	35.625	0	0
4J2	30.0972	0	0.31944
9F2	23.5694	0	0
7B2	27.4306	0	0
6B2	89.6806	0.6	6.04167
1X2	36.25	22.1833	39.0972
2X2	20.8333	2.76667	37.9583
4X2	50.2639	12.6	48.3472
5X2	44.5	60.9333	74.3889
6X2	59.0556	29.0167	59.8611
7X2	41.4167	46.4333	32.2361
8X2	53.2361	35.6667	48.6111
6M2	44.2222	14.5667	11.5694
8T2	27.7222	2.78333	25.5417
5M2	50.4722	7.16667	53.1528
1O1	90.6806	44.35	98.6944
1G2	36.6111	2.58333	10.0139
1J2	63.8194	25.8167	57.3889
4G2	29.2361	10	23.7917
1K3	20.6528	3.81667	32.7361
2K3	15.4028	0	14.3472
3K3	28.2778	13.2667	17.9861
4K3	23	16.4667	14.6528
9J3	20.6111	18.55	38.5556
10J3	44.1667	34.6	42.8333
5Q3	28.0556	18.15	39.6111
7Q3	25.4444	7.45833	39.0417
8Q3	40.7778	20.9667	58.4722
9Q3	27.1806	27	49.8333
10Q3	32.1528	7	30.3194

## Sheet: 1I- Latency to press OF Test
Animal	Reward Phase	Odor Phase	Conflict Phase
3M2	8.41667		30
10T2	16.7333		30
3J2	15.9167		30
4J2	5.8		30
9F2	6.525		30
7B2	1.83333		30
6B2	6.73333		30
1X2	4.91667		4.75
2X2	3.16667		6.45833
4X2	4.08333		4.49167
5X2	4.13333		3.40833
6X2	9.40833		2.54167
7X2	4.15833		3.93333
8X2	3.3		3.13333
6M2	3.56667		23.5167
8T2	6.29167		9.075
5M2	4.04167		6.65
1O1	2.10833		15.4333
1G2	5.26667		22.1833
1J2	3.05833		4.15833
4G2	4.625		10.225
1K3	6.14167		10.2333
2K3	5.825		6.41667
3K3	5.90833		7.4
4K3	3.50833		3.99167
9J3	19.8417		16.5333
10J3	4.15833		3.95833
5Q3	3.61667		3.90833
7Q3	3.225		4.15
8Q3	4.78333		3.15833
9Q3	5.24167		2.80833
10Q3	5.08333		4.11667

## Sheet: 1J - Bar Presses rewarded trial
Animal	Reward Phase	Odor Phase	Conflict Phase
3M2	100		0
10T2	75		0
3J2	75		0
4J2	91.6667		0
9F2	100		0
7B2	100		0
6B2	100		0
1X2	100		100
2X2	100		100
4X2	100		100
5X2	100		100
6X2	100		100
7X2	100		100
8X2	100		100
6M2	100		33.3333
8T2	100		91.6667
5M2	100		100
1O1	100		75
1G2	100		33.3333
1J2	100		100
4G2	100		100
1K3	100		91.6667
2K3	91.6667		91.6667
3K3	100		100
4K3	100		100
9J3	50		83.3333
10J3	100		100
5Q3	100		100
7Q3	100		100
8Q3	100		100
9Q3	100		100
10Q3	100		100

## Sheet: 1M - Freezing - OFT Presser x N
	Pressers	Pressers	Pressers	Pressers	Pressers	Pressers	Pressers	Pressers	Pressers	Pressers	Pressers	Pressers	Pressers	Pressers	Pressers	Pressers	Pressers	Pressers	Pressers	Pressers	Pressers	Pressers	Pressers	Pressers	Pressers					Non-pressers	Non-pressers	Non-pressers	Non-pressers	Non-pressers	Non-pressers	Non-pressers
Reward	1.04167	1.11111	0	0.58333	0.72222	3.72222	0.27778	0.15278	0	0	0.52778	0	0	0	0.58333	0	0.22222	0	4.72222	0	2.93056	0.55556	0.15278	0	0.5					1.33333	0.25	3.95833	1.56944	0.84722	0.26389	0.18056
Odor	19.35	18.1833	3.71667	18.6333	7	1.1	11.25	11.9833	5.16667	4.88333	14.5667	9.73333	12.8667	0.46667	2.83333	8.45	1.35	0.38333	4.75	1.78333	6.96667	7.8	3.36667	0.63333	4.93333					18.7	24.95	29.7167	38.6833	15.3	10.35	2.95
Conflict	5.30556	9.29167	4.26389	2.75	2.51389	3.94444	1.44444	14.5	4.13889	0.58333	1.01389	1.33333	0.20833	2.79167	0.81944	0	0.56944	1.05556	6.58333	0.52778	2.25	0.52778	2.66667	0.15278	2					14.7222	41.8472	27.8611	43.5278	15.9722	11.8611	25.4028

[truncated: 5 more sheets: 1N - Avoidance - OFT Presser x , 1O - Risk Assessment - OFT Pres, 1P - Approaching - OFT Presser , 1Q - Latency  - OFT Presser x N, 1R - Presses - OFT Presser x No]
