# Supplementary material for: Neural correlates and determinants of approach–avoidance conflict in the prelimbic prefrontal cortex
Source: eLife. 2021 Dec 16;10:e74950. doi: 10.7554/eLife.74950 (PMC8853658; doi:10.7554/eLife.74950)
Supplement: Figure 2—figure supplement 1—source data 1. [file elife-74950-fig2-figsupp1-data1.xlsx]

## Sheet: A - Excitatory
	Latency to press	Norm FR
Observations	0.657709	3.41642
	0.587947	3.41642
	0.934662	3.41642
	0.833109	3.41642
	0.657709	6.78435
	0.587947	6.78435
	0.934662	6.78435
	0.833109	6.78435
	0.657709	4.48147
	0.587947	4.48147
	0.934662	4.48147
	0.833109	4.48147
	0.657709	6.78153
	0.587947	6.78153
	0.934662	6.78153
	0.833109	6.78153
	0.657709	3.01425
	0.587947	3.01425
	0.934662	3.01425
	0.833109	3.01425
	0.657709	5.9123
	0.587947	5.9123
	0.934662	5.9123
	0.833109	5.9123
	0.657709	4.67833
	0.587947	4.67833
	0.934662	4.67833
	0.833109	4.67833
	1.19196	2.3442
	0.627495	2.3442
	0.825745	2.3442
	0.877713	2.3442
	0.657709	4.67638
	0.587947	4.67638
	0.934662	4.67638
	0.833109	4.67638
	0.657709	6.2753
	0.587947	6.2753
	0.934662	6.2753
	0.833109	6.2753
	0.696983	2.6412
	1.11435	2.6412
	0.742928	2.6412
	0.676982	2.6412
	0.657709	4.24055
	0.587947	4.24055
	0.934662	4.24055
	0.833109	4.24055
	3.01511	7.20945
	0.897731	7.20945
	1.26131	7.20945
	1.43829	7.20945
	0.60896	7.20945
	3.01511	13.3758
	0.897731	13.3758
	1.26131	13.3758
	1.43829	13.3758
	0.60896	13.3758
	3.01511	4.5415
	0.897731	4.5415
	1.26131	4.5415
	1.43829	4.5415
	0.60896	4.5415
	2.84605	2.97527
	0.851663	2.97527
	1.44914	2.97527
	1.33485	2.97527
	0.674579	2.97527
	3.01511	8.10765
	0.897731	8.10765
	1.26131	8.10765
	1.43829	8.10765
	0.60896	8.10765
	3.01511	4.90725
	0.897731	4.90725
	1.26131	4.90725
	1.43829	4.90725
	0.60896	4.90725
	3.01511	8.6726
	0.897731	8.6726
	1.26131	8.6726
	1.43829	8.6726
	0.60896	8.6726
	2.66667	2.60533
	0.75724	2.60533
	1.33333	2.60533
	1.22355	2.60533
	0.635999	2.60533
	3.01511	3.47115
	0.897731	3.47115
	1.26131	3.47115
	1.43829	3.47115
	0.60896	3.47115
	3.01511	6.27053
	0.897731	6.27053
	1.26131	6.27053
	1.43829	6.27053
	0.60896	6.27053
	3.01511	3.63632
	0.897731	3.63632
	1.26131	3.63632
	1.43829	3.63632
	0.60896	3.63632
	3.01511	3.96932
	0.897731	3.96932
	1.26131	3.96932
	1.43829	3.96932
	0.60896	3.96932
	0.760726	4.19782
	0.760726	4.06428
	0.760726	8.76262
	0.760726	3.82938
	0.760726	5.22845
	0.760726	3.3275
	0.697472	1.92728
	0.760726	4.76035
	0.760726	5.25943
	0.760726	5.7583
	0.760726	3.52338
	0.948556	7.75152
	0.825578	7.75152
	0.667137	7.75152
	1.21872	7.75152
	0.948556	9.4852
	0.825578	9.4852
	0.667137	9.4852
	1.21872	9.4852
	0.948556	4.31762
	0.825578	4.31762
	0.667137	4.31762
	1.21872	4.31762
	0.948556	5.78355
	0.825578	5.78355
	0.667137	5.78355
	1.21872	5.78355
	0.948556	3.9166
	0.825578	3.9166
	0.667137	3.9166
	1.21872	3.9166
	0.948556	7.5825
	0.825578	7.5825
	0.667137	7.5825
	1.21872	7.5825
	0.948556	6.4484
	0.825578	6.4484
	0.667137	6.4484
	1.21872	6.4484
	0.948556	9.98048
	0.825578	9.98048
	0.667137	9.98048
	1.21872	9.98048
	0.948556	8.61283
	0.825578	8.61283
	0.667137	8.61283
	1.21872	8.61283
	0.948556	6.9458
	0.825578	6.9458
	0.667137	6.9458
	1.21872	6.9458
	1.20819	1.84525
	0.44007	1.84525
	1.12426	1.84525
	0.77419	1.84525
	0.948556	10.4106
	0.825578	10.4106
	0.667137	10.4106
	1.21872	10.4106
	0.683622	2.03227
	0.479238	2.03227
	1.24212	2.03227
	0.951899	3.56458
	0.798667	3.56458
	0.910928	3.56458
	0.671346	2.3552
	0.591734	2.3552
	1.06066	2.3552
	0.717178	1.78638
	0.537169	1.78638
	1.10702	1.78638
	0.588295	1.45722
	0.592593	1.45722
	0.956183	1.45722
	0.717178	1.65007
	0.537169	1.65007
	1.10702	1.65007
	0.951899	3.79438
	0.798667	3.79438
	0.910928	3.79438
	0.951899	3.38232
	0.798667	3.38232
	0.910928	3.38232
	0.863513	2.8902
	0.704235	2.8902
	0.820609	2.8902
	0.951899	4.21355
	0.798667	4.21355
	0.910928	4.21355
	0.951899	9.39258
	0.798667	9.39258
	0.910928	9.39258
	0.951899	11.8247
	0.798667	11.8247
	0.910928	11.8247
	1.01388	5.10403
	0.822234	5.10403
	0.71598	5.10403
	0.93542	5.10403
	3.00227	5.10403
	1.01388	3.70348
	0.822234	3.70348
	0.71598	3.70348
	0.93542	3.70348
	3.00227	3.70348
	1.0238	2.36945
	0.943513	2.36945
	0.857466	2.36945
	1.09647	2.36945
	2.47199	2.36945
	1.01388	3.1019
	0.822234	3.1019
	0.71598	3.1019
	0.93542	3.1019
	3.00227	3.1019
	1.01388	3.10145
	0.822234	3.10145
	0.71598	3.10145
	0.93542	3.10145
	3.00227	3.10145
	1.01388	3.5343
	0.822234	3.5343
	0.71598	3.5343
	0.93542	3.5343
	3.00227	3.5343
	0.892352	1.90037
	0.816497	1.90037
	1.13536	1.90037
	0.986835	1.90037
	2.26602	1.90037
	1.13638	2.66728
	0.663358	2.66728
	0.975076	2.66728
	0.957427	2.66728
	2.66177	2.66728
	1.01388	3.23258
	0.822234	3.23258
	0.71598	3.23258
	0.93542	3.23258
	3.00227	3.23258
	0.892352	2.06422
	0.816497	2.06422
	1.13536	2.06422
	0.986835	2.06422
	2.26602	2.06422
	1.13638	2.53028
	0.663358	2.53028
	0.975076	2.53028
	0.957427	2.53028
	2.66177	2.53028
	0.750447	1.6294
	0.717211	1.6294
	0.977338	1.6294
	0.84039	1.6294
	2.04033	1.6294
	0.992516	4.31862
	0.810788	4.31862
	0.992516	9.91783
	0.810788	9.91783
	0.992516	5.85085
	0.810788	5.85085
	0.992516	3.04948
	0.810788	3.04948
	0.992516	6.98245
	0.810788	6.98245
	0.992516	18.748
	0.810788	18.748
	0.992516	19.3476
	0.810788	19.3476
	0.992516	3.74763
	0.810788	3.74763
	0.682666	2.24627
	0.674754	2.24627
	0.992516	3.5782
	0.810788	3.5782
	0.992516	9.81113
	0.810788	9.81113
	0.992516	7.04355
	0.810788	7.04355
	0.695248	5.00935
	0.920106	5.00935
	0.885774	5.00935
	0.752037	5.00935
	0.695248	5.50845
	0.920106	5.50845
	0.885774	5.50845
	0.752037	5.50845
	0.695248	4.64042
	0.920106	4.64042
	0.885774	4.64042
	0.752037	4.64042
	0.695248	3.1395
	0.920106	3.1395
	0.885774	3.1395
	0.752037	3.1395
	0.695248	11.406
	0.920106	11.406
	0.885774	11.406
	0.752037	11.406
	0.695248	3.90468
	0.920106	3.90468
	0.885774	3.90468
	0.752037	3.90468
	0.695248	5.30445
	0.920106	5.30445
	0.885774	5.30445
	0.752037	5.30445
	0.695248	4.23655
	0.920106	4.23655
	0.885774	4.23655
	0.752037	4.23655
	0.695248	3.1694
	0.920106	3.1694
	0.885774	3.1694
	0.752037	3.1694
	0.695248	15.902
	0.920106	15.902
	0.885774	15.902
	0.752037	15.902
	0.909106	1.96822
	0.682304	1.96822
	0.910977	1.96822
	0.972535	1.96822
	1.14918	1.60023
	0.7951	1.60023
	0.796803	1.60023
	1.26964	1.60023
	1.00486	3.7123
	1.19655	3.7123
	1.00486	3.31228
	1.19655	3.31228
	1.12075	2.6782
	1.00364	2.6782
	1.00486	6.67748
	1.19655	6.67748
	1.00486	3.51048
	1.19655	3.51048
	1.00486	4.8086
	1.19655	4.8086
	0.776547	1.7412
	1.03318	1.7412
	1.00486	3.40727
	1.19655	3.40727
	0.776547	1.64025
	1.03318	1.64025
	1.00486	4.04038
	1.19655	4.04038
	1.00486	5.67253
	1.19655	5.67253
	1.00486	5.3043
	1.19655	5.3043
	1.27536	8.2148
	1.27536	3.82535
	1.27536	8.11347
	1.27536	4.58742
	1.27536	3.97828
	1.27536	5.41852
	1.18944	2.81725
	0.759096	2.40125
	1.27536	3.58177
	1.42044	2.20525
	1.27536	4.20747
	0.74928	21.4174
	0.77001	21.4174
	1.13718	21.4174
	0.690548	21.4174
	0.657856	21.4174
	0.855444	21.4174
	0.74928	17.4823
	0.77001	17.4823
	1.13718	17.4823
	0.690548	17.4823
	0.657856	17.4823
	0.855444	17.4823
	0.74928	6.1824
	0.77001	6.1824
	1.13718	6.1824
	0.690548	6.1824
	0.657856	6.1824
	0.855444	6.1824
	0.74928	10.1141
	0.77001	10.1141
	1.13718	10.1141
	0.690548	10.1141
	0.657856	10.1141
	0.855444	10.1141
	0.74928	23.7803
	0.77001	23.7803
	1.13718	23.7803
	0.690548	23.7803
	0.657856	23.7803
	0.855444	23.7803
	0.74928	11.446
	0.77001	11.446
	1.13718	11.446
	0.690548	11.446
	0.657856	11.446
	0.855444	11.446
	0.74928	5.17835
	0.77001	5.17835
	1.13718	5.17835
	0.690548	5.17835
	0.657856	5.17835
	0.855444	5.17835
	0.74928	8.67695
	0.77001	8.67695
	1.13718	8.67695
	0.690548	8.67695
	0.657856	8.67695
	0.855444	8.67695
	0.74928	3.54228
	0.77001	3.54228
	1.13718	3.54228
	0.690548	3.54228
	0.657856	3.54228
	0.855444	3.54228
	0.739287	4.9663
	1.13431	4.9663
	1.34986	4.9663
	1.47321	4.9663
	0.835694	4.9663
	0.739287	5.7315
	1.13431	5.7315
	1.34986	5.7315
	1.47321	5.7315
	0.835694	5.7315
	0.999705	8.09178
	0.999705	6.69147
	0.999705	13.991
	0.999705	25.857
	0.999705	6.55563
	0.999705	13.6218
	0.999705	5.48648
	0.999705	6.9525
	1.0618	8.34982
	1.0618	7.28257
	1.0618	5.71553
	2.57932	2.54813
	1.0618	4.64687
	1.0618	5.9459
	1.48743	2.91242
	1.0618	3.81248
	1.0618	5.37737
	1.0618	4.2435
	1.0618	6.84275
	1.0618	4.9415
	1.3088	8.30145
	1.3088	7.563
	1.3088	6.39398
	0.744556	3.65448
	1.13883	3.65448
	0.890159	3.65448
	0.720681	3.65448
	0.744556	8.75465
	1.13883	8.75465
	0.890159	8.75465
	0.720681	8.75465
	0.744556	18.8533
	1.13883	18.8533
	0.890159	18.8533
	0.720681	18.8533
	0.744556	24.5189
	1.13883	24.5189
	0.890159	24.5189
	0.720681	24.5189
	0.744556	9.68548
	1.13883	9.68548
	0.890159	9.68548
	0.720681	9.68548
	0.744556	7.58448
	1.13883	7.58448
	0.890159	7.58448
	0.720681	7.58448
	0.744556	22.0493
	1.13883	22.0493
	0.890159	22.0493
	0.720681	22.0493
	0.744556	10.7825
	1.13883	10.7825
	0.890159	10.7825
	0.720681	10.7825
	0.744556	4.21435
	1.13883	4.21435
	0.890159	4.21435
	0.720681	4.21435
	0.744556	8.81355
	1.13883	8.81355
	0.890159	8.81355
	0.720681	8.81355
	0.929092	2.57923
	0.960681	2.57923
	0.859375	2.57923
	0.930667	2.57923

## Sheet: B - Inhibitory
	Latency to press	Norm FR
Observations	-0.91869	3.41642
	-0.91869	6.78435
	-0.91869	4.48147
	-0.91869	6.78153
	-0.91869	3.01425
	-0.91869	5.9123
	-0.91869	4.67833
	-0.839439	2.3442
	-0.91869	4.67638
	-0.91869	6.2753
	-0.951495	2.6412
	-0.91869	4.24055
	-0.828872	2.1311
	-0.584462	2.1311
	-0.750488	3.08405
	-0.638313	3.08405
	-0.750488	3.66988
	-0.638313	3.66988
	-0.750488	4.24965
	-0.638313	4.24965
	-0.828872	2.2566
	-0.584462	2.2566
	-0.750488	5.29172
	-0.638313	5.29172
	-0.92603	2.07215
	-0.523205	2.07215
	-0.750488	4.55213
	-0.638313	4.55213
	-0.75724	2.50605
	-0.594103	2.50605
	-0.750488	3.65738
	-0.638313	3.65738
	-0.750488	3.14427
	-0.638313	3.14427
	-0.92603	1.85098
	-0.523205	1.85098
	-1.35674	15.0642
	-1.35674	6.13125
	-1.35674	7.16383
	-1.35674	7.3965
	-1.35674	4.0288
	-1.35674	6.12825
	-1.35674	3.4937
	-1.35674	12.4272
	-1.35674	5.42655
	-1.35674	4.9914
	-1.35674	7.65735
	-1.35674	5.0903
	-0.81345	7.75152
	-0.605789	7.75152
	-0.501846	7.75152
	-0.81345	9.4852
	-0.605789	9.4852
	-0.501846	9.4852
	-0.81345	4.31762
	-0.605789	4.31762
	-0.501846	4.31762
	-0.81345	5.78355
	-0.605789	5.78355
	-0.501846	5.78355
	-0.81345	3.9166
	-0.605789	3.9166
	-0.501846	3.9166
	-0.81345	7.5825
	-0.605789	7.5825
	-0.501846	7.5825
	-0.81345	6.4484
	-0.605789	6.4484
	-0.501846	6.4484
	-0.81345	9.98048
	-0.605789	9.98048
	-0.501846	9.98048
	-0.81345	8.61283
	-0.605789	8.61283
	-0.501846	8.61283
	-0.81345	6.9458
	-0.605789	6.9458
	-0.501846	6.9458
	-0.973831	1.84525
	-0.886078	1.84525
	-0.528423	1.84525
	-0.81345	10.4106
	-0.605789	10.4106
	-0.501846	10.4106
	-0.616123	2.03227
	-0.558444	3.56458
	-0.57166	2.3552
	-0.526138	1.78638
	-0.589938	1.45722
	-0.526138	1.65007
	-0.558444	3.79438
	-0.558444	3.38232
	-0.472783	2.8902
	-0.558444	4.21355
	-0.558444	9.39258
	-0.558444	11.8247
	-0.560825	2.39025
	-0.610692	1.45623
	-0.547018	4.38935
	-0.547018	4.0556
	-0.547018	3.55523
	-0.647569	1.85415
	-0.547018	3.01925
	-0.547018	21.286
	-0.547018	4.81785
	-0.547018	5.88363
	-0.547018	3.78333
	-0.547018	3.58243
	-0.801509	5.10403
	-0.819314	5.10403
	-0.8852	5.10403
	-0.801509	3.70348
	-0.819314	3.70348
	-0.8852	3.70348
	-0.754595	2.36945
	-0.869892	2.36945
	-0.882785	2.36945
	-0.801509	3.1019
	-0.819314	3.1019
	-0.8852	3.1019
	-0.801509	3.10145
	-0.819314	3.10145
	-0.8852	3.10145
	-0.801509	3.5343
	-0.819314	3.5343
	-0.8852	3.5343
	-0.863467	1.90037
	-0.736084	1.90037
	-0.998821	1.90037
	-0.675136	2.66728
	-0.7851	2.66728
	-0.974679	2.66728
	-0.801509	3.23258
	-0.819314	3.23258
	-0.8852	3.23258
	-0.863467	2.06422
	-0.736084	2.06422
	-0.998821	2.06422
	-0.675136	2.53028
	-0.7851	2.53028
	-0.974679	2.53028
	-0.694663	1.6294
	-0.585138	1.6294
	-1.22591	1.6294
	-0.851122	3.7123
	-1.05401	3.7123
	-0.829515	3.7123
	-0.878755	3.7123
	-0.851122	3.31228
	-1.05401	3.31228
	-0.829515	3.31228
	-0.878755	3.31228
	-0.707114	2.6782
	-1.13156	2.6782
	-0.92273	2.6782
	-0.964879	2.6782
	-0.851122	6.67748
	-1.05401	6.67748
	-0.829515	6.67748
	-0.878755	6.67748
	-0.851122	3.51048
	-1.05401	3.51048
	-0.829515	3.51048
	-0.878755	3.51048
	-0.851122	4.8086
	-1.05401	4.8086
	-0.829515	4.8086
	-0.878755	4.8086
	-0.742365	1.7412
	-0.76363	1.7412
	-0.787499	1.7412
	-0.577007	1.7412
	-0.851122	3.40727
	-1.05401	3.40727
	-0.829515	3.40727
	-0.878755	3.40727
	-0.742365	1.64025
	-0.76363	1.64025
	-0.787499	1.64025
	-0.577007	1.64025
	-0.851122	4.04038
	-1.05401	4.04038
	-0.829515	4.04038
	-0.878755	4.04038
	-0.851122	5.67253
	-1.05401	5.67253
	-0.829515	5.67253
	-0.878755	5.67253
	-0.851122	5.3043
	-1.05401	5.3043
	-0.829515	5.3043
	-0.878755	5.3043
	-0.874573	8.2148
	-0.572705	8.2148
	-1.17103	8.2148
	-0.745902	8.2148
	-1.09035	8.2148
	-0.874573	3.82535
	-0.572705	3.82535
	-1.17103	3.82535
	-0.745902	3.82535
	-1.09035	3.82535
	-0.874573	8.11347
	-0.572705	8.11347
	-1.17103	8.11347
	-0.745902	8.11347
	-1.09035	8.11347
	-0.874573	4.58742
	-0.572705	4.58742
	-1.17103	4.58742
	-0.745902	4.58742
	-1.09035	4.58742
	-0.874573	3.97828
	-0.572705	3.97828
	-1.17103	3.97828
	-0.745902	3.97828
	-1.09035	3.97828
	-0.874573	5.41852
	-0.572705	5.41852
	-1.17103	5.41852
	-0.745902	5.41852
	-1.09035	5.41852
	-0.794901	2.81725
	-0.711599	2.81725
	-1.1287	2.81725
	-0.784772	2.81725
	-0.957919	2.81725
	-0.869203	2.40125
	-0.608189	2.40125
	-1.02203	2.40125
	-0.694341	2.40125
	-1.18923	2.40125
	-0.874573	3.58177
	-0.572705	3.58177
	-1.17103	3.58177
	-0.745902	3.58177
	-1.09035	3.58177
	-1.0443	2.20525
	-0.595515	2.20525
	-0.906845	2.20525
	-0.571218	2.20525
	-1.0875	2.20525
	-0.874573	4.20747
	-0.572705	4.20747
	-1.17103	4.20747
	-0.745902	4.20747
	-1.09035	4.20747
	-0.954094	21.4174
	-0.795066	21.4174
	-0.678631	21.4174
	-0.954094	17.4823
	-0.795066	17.4823
	-0.678631	17.4823
	-0.954094	6.1824
	-0.795066	6.1824
	-0.678631	6.1824
	-0.954094	10.1141
	-0.795066	10.1141
	-0.678631	10.1141
	-0.954094	23.7803
	-0.795066	23.7803
	-0.678631	23.7803
	-0.954094	11.446
	-0.795066	11.446
	-0.678631	11.446
	-0.954094	5.17835
	-0.795066	5.17835
	-0.678631	5.17835
	-0.954094	8.67695
	-0.795066	8.67695
	-0.678631	8.67695
	-0.954094	3.54228
	-0.795066	3.54228
	-0.678631	3.54228
	-0.900134	11.4001
	-0.900134	22.7665
	-0.900134	8.9326
	-0.900134	9.63193
	-0.900134	6.49733
	-0.900134	10.1307
	-0.900134	10.0316
	-0.900134	6.02942
	-0.900134	5.76253
	-0.900134	9.0607
	-0.900134	6.89365
	-0.900134	3.05925
	-0.720651	4.9663
	-0.574782	4.9663
	-0.593944	4.9663
	-0.877802	4.9663
	-0.720651	5.7315
	-0.574782	5.7315
	-0.593944	5.7315
	-0.877802	5.7315
	-0.552453	4.9663
	-0.552453	5.7315
	-0.860761	8.34982
	-0.860761	7.28257
	-0.860761	5.71553
	-0.669002	2.54813
	-0.860761	4.64687
	-0.860761	5.9459
	-0.769889	2.91242
	-0.860761	3.81248
	-0.860761	5.37737
	-0.860761	4.2435
	-0.860761	6.84275
	-0.860761	4.9415
	-0.774143	6.50063
	-0.537319	6.50063
	-0.774143	6.36665
	-0.537319	6.36665
	-0.774143	9.63275
	-0.537319	9.63275
	-0.774143	6.79807
	-0.537319	6.79807
	-0.774143	8.26442
	-0.537319	8.26442
	-0.774143	4.53048
	-0.537319	4.53048
	-0.465475	1.12912
	-1.47029	1.12912
	-0.774143	5.86177
	-0.537319	5.86177
	-0.774143	4.59537
	-0.537319	4.59537
	-0.809017	1.69433
	-0.629608	1.69433
	-0.774143	4.49235
	-0.537319	4.49235
	-0.774143	3.45865
	-0.537319	3.45865
	-0.733236	3.65448
	-0.82166	3.65448
	-0.47903	3.65448
	-0.733236	8.75465
	-0.82166	8.75465
	-0.47903	8.75465
	-0.733236	18.8533
	-0.82166	18.8533
	-0.47903	18.8533
	-0.733236	24.5189
	-0.82166	24.5189
	-0.47903	24.5189
	-0.733236	9.68548
	-0.82166	9.68548
	-0.47903	9.68548
	-0.733236	7.58448
	-0.82166	7.58448
	-0.47903	7.58448
	-0.733236	22.0493
	-0.82166	22.0493
	-0.47903	22.0493
	-0.733236	10.7825
	-0.82166	10.7825
	-0.47903	10.7825
	-0.733236	4.21435
	-0.82166	4.21435
	-0.47903	4.21435
	-0.733236	8.81355
	-0.82166	8.81355
	-0.47903	8.81355
	-0.703707	2.57923
	-0.928085	2.57923
	-0.397523	2.57923
	-0.640511	5.09553
	-0.386073	5.09553
	-0.658631	2.99555
	-0.400895	2.99555
	-0.640511	3.76085
	-0.386073	3.76085
	-0.640511	5.49442
	-0.386073	5.49442
	-0.772185	2.32625
	-0.34732	2.32625
	-1.02889	0.85915
	-1.09109	0.85915
	-0.640511	10.8252
	-0.386073	10.8252
	-0.680544	2.69128
	-0.37559	2.69128
	-0.778009	1.65653
	-0.404075	1.65653
	-0.640511	3.85568
	-0.386073	3.85568
	-0.640511	8.45562
	-0.386073	8.45562
	-0.640511	4.52177
	-0.386073	4.52177
