# Supplementary material for: Neural correlates and determinants of approach–avoidance conflict in the prelimbic prefrontal cortex
Source: eLife. 2021 Dec 16;10:e74950. doi: 10.7554/eLife.74950 (PMC8853658; doi:10.7554/eLife.74950)
Supplement: Figure 2—figure supplement 3—source data 1. [file elife-74950-fig2-figsupp3-data1.xlsx]

## Sheet: B - % Lever press
		#		%
Excitatory		34		14.346
Inhibitory		22		9.2827
No change		181		76.3713
Total		237

## Sheet: C - Lever Press responses
Time/# neurons	1	2	3	4	5	6	7	8	9	10	11	12	13	14	15	16	17	18	19	20	21	22	23	24	25	26	27	28	29	30	31	32	33	34	35	36	37	38	39	40	41	42	43	44	45	46	47	48	49
-6	0.398324	-0.926187	-1.352	-0.103503	-0.409447	-1.03327	-0.268963	0.0930911	-1.03337	1.96387	-1.08633	-0.020568	-0.0361822	-0.562731	-1.11414	-0.298443	-0.639865	1.10578	-1.40014	-0.451576	-1.06777	-1.16326	-1.29223	-0.655183	-0.257331	-1.09432	-0.869517	-0.817933	1.28716	-1.48679	-0.284853	0.215534	0.157075	0.445438	-0.386737	-0.755972	0.012624	-0.405343	-1.11564	-0.113518	-0.974005	-0.345081	-1.18696	-0.725144	1.96332	0.277179	-1.16405	-0.280716	-0.324893
	1.69519	-1.68226	-1.03388	0.398329	-0.409447	-0.429017	-0.513475	-1.30327	-1.15035	1.35492	-1.34652	0.39079	1.16989	-0.562731	-0.905892	-0.36705	-0.639865	-1.0577	-1.32537	-0.451576	-0.367592	-1.00435	-1.29223	0.119765	0.555294	-0.0295762	-1.43309	-1.17746	-0.0771107	-1.72467	-0.408703	-0.215534	-0.414108	0.82861	-0.931438	-1.10412	-0.828971	0.548405	-0.637508	-0.0189196	1.54695	-0.805188	-0.581366	0.298065	0.902066	1.94025	-0.987678	-1.6843	-0.324893
	1.50993	-0.926187	1.19294	-0.542606	-0.409447	-1.15412	-1.24701	-1.30327	-1.34533	0.137014	-0.565931	1.76198	-0.0361822	-0.562731	-1.11414	-0.984518	-0.23995	-0.336542	-1.47491	0.701384	-0.951072	-0.813647	-1.41668	-0.936982	1.36792	-1.25206	-0.950027	-0.368519	0.693997	0.178414	-0.284853	0.3233	-1.84207	1.0202	-1.25826	-1.55173	-0.91313	0.309968	-1.11564	-1.0595	2.00531	2.87567	-0.702484	0.876401	0.0530628	0.277179	-0.987678	0.655005	-0.324893
	0.305691	-1.30422	-1.352	-1.48354	-0.409447	-0.549867	-0.757987	-1.30327	-0.838392	-0.776413	-1.60672	0.939266	-0.277396	-0.562731	-1.11414	-0.847303	0.159966	-1.29809	-0.652402	-0.259416	-0.912174	-1.00435	-0.462547	-0.725632	-1.20539	-1.29149	-0.789006	-0.997699	1.10921	0.892072	-0.656402	-0.431067	0.442667	0.253851	-2.23872	-0.755972	-0.408173	-0.166906	-0.796886	0.359472	0.401061	-0.345081	-0.94472	1.76615	-0.371439	-0.0251981	-0.458565	-1.21644	-0.324893
	0.305691	-0.926187	-0.0795297	-1.54627	-0.409447	-1.1944	-0.268963	-0.605091	-0.994372	-0.471938	1.77585	0.527908	-1.24225	1.68819	-0.697641	-0.91591	-1.4397	0.144232	-0.764563	-0.451576	-0.678782	-1.03613	-1.25074	-0.373384	-1.61171	-1.01545	-0.386452	-0.907816	0.753313	-0.297358	-0.594477	-1.50874	-0.414108	1.30757	-0.822498	-0.208887	-0.239855	-0.166906	-0.956263	0.170276	1.54695	-0.345081	0.387577	0.920888	-1.43269	-1.43629	-0.458565	-0.280716	2.92404
	1.32466	0.585955	-0.397646	-0.542606	-0.409447	0.215516	0.464573	-1.07054	-0.370452	-1.38537	-0.305733	-0.294806	-0.277396	-0.562731	-1.18356	-0.298443	0.559882	-0.817316	-0.652402	-0.451576	-0.562086	-0.781864	-0.669968	-0.796082	0.148981	-1.37036	-0.305941	-0.278637	1.64305	-0.297358	-0.966025	0.3233	0.157075	-1.8536	-0.495678	-0.755972	0.012624	0.786842	0.318754	-1.24869	-0.286472	0.115027	-0.218012	1.49922	-0.371439	-0.0755941	-0.987678	-0.280716	-0.324893
	-0.250111	-0.170116	-1.67011	-0.166232	-0.409447	-0.267884	0.709085	-0.605091	-0.721407	0.44149	-0.696029	-0.020568	-0.0361822	-0.562731	-0.0728879	-0.572873	-0.23995	-0.817316	-0.540241	0.509224	-0.406491	-0.750081	-0.255127	-0.232484	-0.257331	-0.0295762	1.22376	0.710074	1.04989	-1.01102	-1.08987	-0.538834	1.29944	-1.7578	-0.277797	-0.308357	-1.24977	0.548405	-0.478132	1.49465	0.171884	0.115027	-0.33913	0.520502	-0.79594	-0.730743	0.246919	1.12287	-0.324893
	-1.63961	0.20792	0.874822	-0.605335	2.3202	-0.912417	1.68713	-0.372364	-0.0194975	-0.776413	0.60496	-0.980401	-0.518609	1.68819	-1.46123	-1.32756	-1.03978	0.384619	-0.502854	-0.835896	-0.44539	-0.686515	-0.255127	-1.14833	-1.47627	-0.897145	0.338145	-0.00898821	-0.195743	0.892072	-0.842176	0.3233	0.442667	-0.799872	-0.604618	-0.109417	0.265102	0.786842	8.61e-08	-0.0189196	-0.286472	-1.2653	-0.702484	0.0311412	0.689815	-0.478763	0.42329	0.655005	2.92404
	-0.991179	0.20792	0.556705	0.0846842	-0.409447	-0.509584	-1.49152	-0.372364	-0.175477	0.137014	0.344762	0.116551	-0.759823	-0.562731	0.829534	0.593455	-1.03978	-0.0961545	-0.278533	0.509224	0.0602929	0.0444963	-0.255127	-0.373384	0.148981	-0.345056	0.901721	0.26066	-0.433007	-1.01102	-0.594477	-0.862135	0.728258	-0.0335276	-0.168857	-0.606767	0.012624	-0.405343	0.159377	0.359472	0.171884	-1.7254	-0.218012	-1.30348	-1.64494	-0.327575	-0.282194	-0.748578	-0.324893
	0.120424	0.20792	0.556705	-0.91898	-0.409447	-0.831851	-0.513475	0.558545	-0.331457	1.65939	-0.956228	-0.294806	-0.0361822	-0.562731	-0.767058	-0.91591	-0.23995	-0.817316	0.207498	-0.259416	-0.328694	-0.336901	0.242682	0.753812	-1.74714	-0.226751	0.177124	-0.817933	0.397417	0.892072	-0.346778	1.50874	2.44181	-0.512493	-1.04038	-0.606767	-0.239855	-0.405343	1.27502	-2.00547	0.171884	0.115027	-0.823602	-0.235783	1.11432	-0.226783	-0.987678	2.05859	-0.324893
	0.213057	-0.170116	-1.03388	-0.29169	-0.409447	0.215516	-0.757987	-0.605091	-0.331457	0.745966	-1.21643	2.17334	-0.0361822	-0.562731	-0.142305	-0.778695	0.559882	-0.336542	0.132724	0.124904	-0.289795	0.203412	-0.338095	-0.443833	-0.663644	0.167599	0.0966128	-0.548285	-0.729587	-0.0594717	0.334393	1.07767	0.157075	-1.66201	0.0490232	0.537138	1.44333	-1.35909	2.23128	0.548668	-1.43236	0.115027	-0.581366	-0.680657	0.0530628	-0.932328	-0.282194	-1.21644	-0.324893
	-0.157477	0.585955	-0.397646	1.96655	-0.409447	-0.267884	0.709085	0.791	0.0584925	-0.471938	0.0845643	-0.294806	0.205032	-0.562731	0.621283	0.799277	-0.23995	-0.576929	-0.390693	-0.835896	-0.328694	0.362327	0.32565	0.0493147	-0.528206	0.404208	-1.5136	-0.0988711	-1.44138	-1.01102	0.705941	-0.754368	0.442667	-0.799872	0.266903	0.686343	0.938378	-0.882217	8.61e-08	-1.15409	-0.0572943	1.49535	0.993167	1.41025	-1.00819	-0.0251981	-0.634936	0.655005	-0.324893
	-0.991179	0.585955	-0.0795297	0.272871	2.3202	1.66572	-1.24701	1.25673	0.994372	-1.08089	-0.435832	-1.25464	-0.759823	1.68819	-0.211722	2.51447	0.559882	0.144232	0.656141	1.0857	0.0602929	0.0762794	0.408618	0.894712	0.419856	0.601383	-1.19156	-0.0988711	1.10921	0.416301	-0.0990795	0.754368	-0.699699	0.0622655	0.920544	0.0397879	-0.324014	-0.64378	1.27502	-0.0189196	-0.744828	-0.345081	0.0242236	1.05435	-1.00819	-0.982724	0.952403	1.12287	-0.324893
	0.768859	-0.170116	1.82917	1.02562	2.3202	0.860049	1.44262	1.024	1.15035	-0.471938	0.865158	1.2135	-0.518609	1.68819	1.31545	-0.0240126	0.159966	-0.336542	1.55343	-0.259416	1.46064	0.870857	1.4872	0.260664	1.50336	1.42952	0.338145	1.06961	-1.44138	0.178414	1.51096	-0.107767	-1.27088	-0.129321	0.484784	1.58157	0.349262	-0.166906	1.59377	0.45407	-1.20318	0.115027	0.145342	-0.28027	1.11432	0.12599	-0.987678	-1.21644	-0.324893
	-0.0648434	-1.30422	1.82917	0.586516	-0.409447	-0.267884	0.953596	0.0930911	0.175477	-1.08089	1.90595	-1.39176	-1.72468	-0.562731	1.31545	-0.572873	-0.639865	0.625006	1.10478	-1.02806	0.215888	1.28404	1.32127	0.612913	0.690731	1.31121	0.82121	0.620191	-0.314375	2.0815	1.57289	-0.862135	-0.699699	1.40337	1.24736	0.835548	0.6859	-0.405343	0.478131	1.11625	-0.51565	0.115027	0.872049	-0.324758	0.0530628	0.0755941	0.599662	0.655005	-0.324893
	0.768859	0.96399	0.238588	-0.668064	-0.409447	0.215516	-1.0025	2.18764	0.409447	1.65939	0.214663	0.25367	0.446246	1.68819	0.482448	0.593455	-1.03978	-0.336542	0.54398	0.509224	0.0602929	1.79257	0.823459	0.0493147	-0.121894	0.601383	1.30427	0.530308	-0.907535	1.36784	1.07749	1.50874	-1.27088	1.21178	1.13842	0.437668	2.62157	-0.882217	0.478131	-1.15409	0.401061	-0.805188	-0.218012	-0.591682	1.53882	0.176386	-0.105822	-1.21644	-0.324893
	-0.157477	-0.548152	0.556705	-0.228961	-0.409447	0.819765	0.464573	0.325818	0.604422	-0.167462	1.12536	0.25367	-0.0361822	-0.562731	0.551866	1.0051	2.15955	-0.0961545	0.357045	1.47002	0.176989	0.839074	-0.421063	0.331114	0.961606	0.877427	1.78734	0.440426	0.693997	0.654187	-0.470628	1.18544	-0.128516	-0.225113	1.46524	-0.755972	0.433421	0.309968	0.159377	1.40005	-0.974005	1.03524	-1.18696	-1.39245	-1.00819	1.18431	2.36337	0.655005	-0.324893
	0.213057	1.72006	-0.397646	-0.0407739	-0.409447	-0.106751	-0.757987	1.25673	-0.0584924	-0.471938	0.344762	-1.11752	3.0996	-0.562731	1.1072	1.07371	1.35971	0.865393	-0.128985	-1.22022	0.215888	-0.0826361	-0.0891907	-0.655183	0.284419	-0.739405	1.38479	-0.458402	-1.08548	-0.535243	-1.3995	1.07767	1.01385	0.637024	0.375843	0.0397879	-0.0715355	-0.882217	-0.637508	-1.0595	-1.43236	-0.805188	1.59876	-0.324758	-0.159188	0.377971	1.30515	-0.280716	-0.324893
	-1.63961	1.72006	0.238588	0.272871	-0.409447	0.739199	1.44262	-0.837817	1.15035	-0.776413	0.344762	-0.569044	1.16989	-0.562731	0.968368	-0.229835	2.15955	0.384619	1.85252	-1.22022	0.643773	-0.177985	1.36275	-0.232484	0.148981	0.956297	-0.144919	-0.368519	-1.32275	0.654187	0.458243	-1.07767	0.442667	0.732817	1.24736	0.586873	-0.324014	0.0715307	-0.956263	0.548668	0.401061	0.115027	2.68882	-1.08104	-0.159188	-1.63787	1.12877	0.655005	-0.324893
0	-1.73225	1.34203	-0.0795297	2.53112	-0.409447	2.79365	0.953596	0.791272	2.82714	-0.167462	0.60496	-1.39176	0.205032	-0.562731	1.59312	1.55396	-0.23995	3.26926	1.70298	2.81514	3.44448	2.36466	2.0265	3.50135	1.63879	1.94217	-0.789006	3.31668	-0.788903	-0.773129	2.37791	-1.9398	-0.985291	-0.129321	1.02948	2.77521	-2.17552	3.40965	-1.27502	1.40005	1.08859	0.575135	0.993167	-1.43694	0.477564	2.44421	1.30515	0.187145	-0.324893
	4.01103	5.12238	0.556705	4.2248	7.77949	4.40498	4.62127	3.81672	3.72402	3.18177	3.07684	1.76198	1.65231	6.19004	4.3698	3.26915	4.95896	3.26926	2.52549	4.54458	2.97769	4.11273	2.23392	2.65596	3.53492	2.21822	0.901721	2.50773	0.812629	2.55727	1.63481	-0.431067	1.87063	1.11599	1.24736	1.87998	-0.239855	3.40965	1.91253	3.10281	1.54695	1.03524	0.993167	1.18781	1.53882	1.43629	0.0705485	1.12287	2.92404
	5.12264	3.98828	7.55528	3.22113	-0.409447	2.6728	2.42067	3.11854	3.06111	2.8773	2.81664	4.093	4.06445	-0.562731	1.24604	2.24004	0.159966	1.82694	2.52549	0.317064	1.81073	0.521243	2.19243	1.74011	0.690731	1.8633	3.15602	1.33925	3.00732	1.12996	1.94443	3.98737	1.58503	2.26551	2.11889	1.4821	3.54732	-0.166906	1.27502	0.0756784	1.54695	1.95546	1.96211	1.72166	1.32657	1.38589	2.71611	1.59073	-0.324893
	-0.528011	2.47613	5.01034	-0.605335	-0.409447	-0.267884	-1.0025	0.558545	0.331457	-1.08089	1.12536	5.05284	5.75295	1.68819	0.898951	-0.36705	-0.23995	-0.0961545	0.618754	-1.02806	0.565976	-0.559383	0.53307	-0.514283	-0.663644	0.561948	2.75347	1.24937	0.278785	3.03305	0.644017	-0.215534	1.58503	-0.225113	0.484784	0.089523	1.35918	-1.35909	-0.159377	-0.491909	0.171884	1.03524	-0.702484	2.52243	1.11432	-0.0251981	4.47982	-0.748578	-0.324893
	-0.528011	1.34203	2.14729	-0.0407739	2.3202	-0.751284	-1.0025	1.024	-0.487437	-0.471938	-0.435832	-0.294806	8.88873	-0.562731	0.482448	1.0051	-0.639865	2.78849	-0.091598	0.124904	0.0991916	-0.686515	-1.00184	-0.0915846	-0.121894	-0.266186	2.35091	0.0808943	-1.32275	2.79516	0.582092	-2.04757	1.58503	1.11599	-1.80296	-0.855442	0.180943	0.309968	-1.43439	1.02166	-0.286472	-0.345081	-0.218012	-0.28027	0.0530628	0.680347	6.06716	0.187145	-0.324893
	-2.10278	1.72006	1.51106	0.586516	-0.409447	-0.308167	-1.24701	1.48945	0.175477	-1.08089	1.25546	-1.25464	6.47659	-0.562731	-0.142305	-0.229835	-1.03978	1.82694	-0.166372	0.317064	0.332584	0.457677	-0.545516	-1.64148	-0.934518	0.561948	1.94836	0.350543	-2.68702	2.0815	2.19213	-1.40097	-1.27088	-0.225113	-2.4566	0.139258	-1.16561	0.0715307	-1.59377	0.927059	0.171884	1.03524	0.145342	-2.01528	0.265313	0.730743	5.71442	-0.280716	-0.324893
	-3.02912	0.96399	-1.67011	0.0219551	-0.409447	0.940616	1.93164	1.25673	1.96925	0.137014	0.735059	-1.94024	3.58202	-0.562731	-0.142305	1.41674	-1.4397	2.06733	0.917849	-0.835896	1.26615	1.98327	0.53307	0.965162	0.961606	0.285903	1.22376	1.96843	-1.73796	1.84362	0.644017	-0.107767	0.728258	0.541231	-2.89236	0.835548	0.265102	1.02528	-1.11564	0.170276	0.630239	0.575135	3.17329	-0.636169	0.477564	1.03312	5.36168	-0.280716	-0.324893
	-2.47332	1.72006	0.556705	0.523787	-0.409447	0.497499	0.709085	1.48945	2.39819	0.137014	1.38555	-0.980401	3.34081	-0.562731	-0.00347079	1.75978	-1.03978	0.865393	0.357045	-0.0672557	1.46064	1.9197	-0.255127	0.542463	-0.934518	-0.818275	0.740699	-0.638168	-2.92428	0.892072	0.767866	-0.538834	-0.699699	1.11599	-2.34766	-0.059682	1.02254	-1.12065	-0.318754	2.62982	3.15119	0.115027	-0.94472	-0.680657	0.265313	-0.0755941	2.53974	2.52645	-0.324893
	-2.84385	0.96399	-0.397646	0.900161	-0.409447	0.537782	2.17615	0.791272	4.03598	0.745966	0.60496	-0.980401	3.82324	-0.562731	0.968368	2.03421	-0.639865	1.58655	0.656141	0.317064	2.04412	2.01505	0.201198	1.03561	-0.257331	-0.423926	-0.869517	0.170777	-0.907535	1.12996	1.01556	-1.72427	-0.699699	-0.512493	-2.02084	-0.00994695	0.854218	1.02528	-1.27502	3.10281	0.630239	0.115027	-1.55031	-1.74835	-0.371439	-0.226783	0.599662	-1.21644	-0.324893
	-0.898545	0.585955	0.238588	-0.0407739	-0.409447	1.02118	0.953596	-0.372364	3.06111	0.44149	2.16615	-0.980401	2.37596	-0.562731	0.621283	2.92611	-0.23995	1.82694	1.32911	-1.02806	1.46064	0.616592	0.242682	-0.655183	-0.392769	0.128164	-0.305941	0.350543	-2.15317	-1.72467	0.705941	-0.538834	-1.27088	3.22344	-2.4566	0.139258	-0.828971	1.74059	-1.43439	1.77844	3.15119	0.115027	-1.30807	-0.769631	-1.22044	-0.0251981	0.246919	-0.280716	-0.324893
	-1.63961	-0.548152	0.874822	1.33926	-0.409447	1.18232	1.93164	-0.372364	3.45106	0.44149	2.94674	0.527908	3.0996	-0.562731	1.03778	2.51447	0.559882	2.06733	1.36649	1.0857	1.65514	-0.209768	0.699007	0.331114	-1.20539	1.23234	-0.144919	0.799957	-0.966851	0.654187	0.272469	-1.40097	-1.55647	1.78654	-2.12978	0.288463	-0.91313	0.548405	-1.59377	0.548668	2.92202	1.03524	-0.218012	-0.45822	1.96332	2.29302	1.30515	0.187145	-0.324893
	-0.898545	0.96399	0.238588	1.8411	-0.409447	2.02827	2.90969	0.325818	3.84101	-0.167462	0.995258	-1.11752	3.82324	-0.562731	0.482448	2.72029	0.559882	1.10578	1.21694	-1.22022	3.09439	-0.0826361	0.906427	2.8673	1.09704	0.759123	0.579678	0.530308	0.0415212	-0.0594717	0.829791	-0.862135	-1.55647	0.924403	-2.23872	1.03449	-0.660652	1.02528	-1.59377	3.85959	2.23448	-0.345081	0.145342	-0.680657	-1.85719	0.176386	3.06886	-0.280716	-0.324893
	0.676225	2.0981	1.51106	1.8411	-0.409447	1.9477	0.220061	1.024	2.71015	-0.471938	0.214663	-0.431925	2.85838	-0.562731	1.5237	0.593455	-0.639865	3.26926	1.10478	-0.643736	2.04412	0.203412	-0.0891907	0.965162	0.555294	0.364773	1.94836	0.799957	-0.492323	-2.67622	1.38711	-0.431067	-0.414108	0.732817	-2.02084	1.23343	-0.828971	-0.166906	-1.59377	0.737863	2.46366	1.03524	-0.702484	-0.146808	-1.85719	-0.78114	0.42329	-1.21644	-0.324893
	1.32466	0.20792	0.238588	0.711974	-0.409447	1.10175	2.17615	0.558545	2.3202	0.137014	3.07684	-0.569044	3.82324	-0.562731	1.1072	1.96561	-0.23995	1.58655	0.0579498	-2.18102	0.954962	-0.209768	-0.504032	0.683363	-0.121894	0.798558	1.70683	0.26066	-0.729587	-0.535243	0.767866	0.107767	-2.12766	1.49916	-1.80296	-0.656502	0.854218	0.786842	-0.956263	0.927059	2.69284	-1.2653	0.0242236	-0.0133462	-0.159188	-0.176386	-0.987678	0.187145	-0.324893
	-0.805912	0.20792	0.874822	0.649245	-0.409447	0.698916	2.17615	-0.837817	1.61829	1.05044	1.25546	-1.11752	2.85838	-0.562731	-0.00347079	1.21092	-1.4397	1.58655	0.244884	-1.02806	1.14946	-0.273335	-0.00622263	0.260664	0.419856	0.207033	1.14325	0.170777	-0.788903	0.892072	-0.161004	5.82e-08	-0.699699	0.0622655	-2.4566	-0.059682	0.349262	3.88652	-1.59377	1.49465	4.98462	2.41557	0.629813	-1.03656	-0.58369	0.629951	0.246919	-1.21644	-0.324893
	-1.26908	-0.926187	-0.715763	0.711974	-0.409447	0.0543824	-0.268963	-0.605091	2.16422	-0.471938	0.344762	-1.25464	2.37596	-0.562731	0.829534	0.387632	-1.03978	2.06733	0.618754	-2.37318	1.22725	-0.209768	-0.462547	1.81056	-1.20539	-0.345056	0.740699	0.26066	-0.966851	0.178414	0.829791	-1.2932	-1.27088	-1.37463	-1.04038	0.736078	-0.492333	0.548405	-1.43439	1.77844	2.92202	0.115027	-0.460248	-0.814119	-0.79594	-0.428367	-1.16405	-0.280716	-0.324893
	-0.435378	-0.548152	0.556705	0.774703	-0.409447	0.0140992	2.42067	-0.372364	0.916382	-0.167462	-1.60672	-0.706163	4.78809	-0.562731	0.413031	-0.36705	-1.03978	0.865393	-0.951498	-1.02806	0.954962	-0.781864	-1.04332	-0.373384	-1.34083	0.167599	0.418656	0.620191	0.575365	0.416301	0.272469	-0.969902	-0.985291	1.0202	-1.47614	0.437668	-0.91313	1.74059	-1.11564	1.77844	3.15119	-0.345081	-0.218012	1.67717	0.902066	-0.12599	-1.34042	-0.280716	-0.324893
	1.50993	-0.170116	-0.715763	0.837432	-0.409447	-0.227601	-0.0244514	-1.30327	1.07236	1.96387	-0.305733	-1.25464	2.61717	-0.562731	-0.350556	0.662062	-0.23995	1.34617	-0.278533	-2.94966	0.410381	-0.908997	-0.545516	-0.725632	-0.528206	0.404208	1.22376	0.799957	-0.551639	-1.2489	0.582092	-0.107767	0.157075	1.0202	-2.02084	-0.407827	0.265102	-0.64378	-1.43439	0.170276	4.06791	0.115027	0.26646	-0.502707	1.11432	0.327575	-3.10413	-0.280716	-0.324893
	0.0277899	-0.548152	0.874822	-0.730793	-0.409447	-0.0261841	-1.0025	-1.30327	0.292462	1.35492	-0.565931	-1.52888	1.4111	-0.562731	-0.142305	0.0445949	-1.03978	0.625006	0.955236	-0.0672557	0.604874	-1.32218	0.947911	-0.584733	0.0135437	1.39008	0.901721	0.799957	-0.314375	-1.2489	2.00636	0.538834	-0.985291	0.541231	-2.67448	0.338198	-0.239855	-0.166906	-1.43439	0.359472	2.46366	0.115027	-0.33913	1.18781	1.53882	0.932328	-1.69316	-0.280716	2.92404
	0.0277899	-0.926187	-1.03388	0.837432	2.3202	0.739199	0.220061	-2.00145	1.03337	-0.776413	-0.305733	0.527908	2.85838	1.68819	0.20478	-0.229835	0.559882	0.384619	0.917849	-1.7967	1.26615	-1.03613	0.947911	1.17651	-1.20539	0.798558	0.418656	-0.00898821	-1.1448	0.416301	0.458243	-0.754368	-0.699699	0.732817	-1.80296	1.4821	-0.576492	1.02528	-1.43439	2.06223	0.859417	0.575135	-0.218012	0.920888	-2.91845	0.176386	-0.987678	-0.280716	2.92404
6	-1.54698	-0.548152	0.874822	1.96655	-0.409447	0.336366	-1.24701	-1.07054	0.292462	0.137014	0.735059	0.25367	2.85838	-0.562731	-0.48939	0.867885	0.159966	-0.0961545	0.506593	-1.7967	0.760469	-0.972563	-0.379579	-0.514283	-0.392769	0.00985879	0.0161023	-0.638168	1.04989	2.0815	0.148619	-1.40097	-0.414108	-0.608286	-1.9119	0.188993	0.265102	0.786842	-0.956263	0.737863	2.00531	0.575135	-0.94472	-0.0133462	-1.43269	0.377971	-2.39865	1.12287	-0.324893
[truncated: 187 more columns]

## Sheet: D - Exc Zscore time cours
Time	Time course	SEM
-6	-0.35098	0.140724
	-0.39558	0.151948
	-0.35764	0.143767
	-0.44617	0.135491
	-0.2724	0.160919
	-0.35811	0.105933
	-0.26814	0.127179
	-0.04705	0.199551
	-0.10476	0.097738
	-0.31232	0.133211
-3	-0.06504	0.132621
	-0.04533	0.128945
	0.258446	0.175037
	0.538671	0.150373
	0.141813	0.171692
	0.39939	0.167337
	0.509989	0.132734
	0.086381	0.168468
	0.205245	0.144891
	0.883586	0.286263
0	3.29863	0.277282
	1.72216	0.364914
	0.73129	0.346464
	0.739144	0.353264
	0.488364	0.329836
	0.812539	0.322732
	0.770451	0.23447
	0.931174	0.242632
	0.559561	0.238955
	0.723856	0.211365
3	0.983397	0.264926
	0.859028	0.276233
	0.776386	0.210424
	0.605628	0.200541
	0.201269	0.216073
	0.174648	0.216359
	0.048833	0.22029
	0.009638	0.177859
	0.398973	0.217939
	0.267329	0.239402
6	-0.17278	0.174353

## Sheet: E - Exc example time cour
Time	Time course
-6	0.833333
	1.11111
	3.05556
	0.833333
	1.94444
	1.66667
	0.555556
	2.77778
	2.5
	2.5
-3	1.11111
	1.66667
	1.94444
	3.61111
	3.61111
	2.22222
	2.5
	1.66667
	2.22222
	1.94444
0	2.5
	8.61111
	6.38889
	3.88889
	3.33333
	0.555556
	2.5
	1.66667
	2.22222
	2.77778
3	2.22222
	3.33333
	2.22222
	2.77778
	1.38889
	2.5
	1.38889
	2.77778
	1.11111
	2.77778
6	1.38889
0
15
30 sec

## Sheet: F - Inh Zscore time cours
Time	Time course	SEM
-6	0.432918	0.188902
	0.804272	0.221456
	0.330257	0.176069
	0.532233	0.210638
	0.355728	0.226183
	0.234605	0.178728
	0.227424	0.162331
	0.066583	0.138867
	0.035853	0.250421
	0.2111	0.183144
-3	0.177719	0.197404
	-0.00395	0.247092
	-0.47591	0.16831
	-0.40938	0.141758
	-0.33825	0.170027
	-0.66441	0.151644
	-0.46889	0.195631
	-0.19366	0.21756
	-0.36603	0.208212
	-0.48822	0.204277
0	-1.12992	0.222341
	-2.29351	0.14944
	-1.69297	0.222055
	-1.20819	0.27003
	-0.75518	0.242623
	-0.5422	0.28835
	-0.3165	0.283277
	-0.25621	0.307637
	-0.57923	0.286663
	-0.52067	0.267424
3	-0.24056	0.247866
	-0.2629	0.280849
	-0.11156	0.293861
	-0.55237	0.265984
	-0.27984	0.327896
	-0.13628	0.267812
	-0.09267	0.286278
	-0.04164	0.269061
	0.083034	0.351303
	0.160964	0.285416
6	0.041874	0.256365

## Sheet: G - Inh example time cour
Time	Time course
-6	5
	7.22222
	6.11111
	8.33333
	5.83333
	6.11111
	6.11111
	4.72222
	2.22222
	3.33333
-3	5.83333
	2.77778
	2.5
	5.83333
	6.94444
	4.72222
	4.44444
	6.38889
	6.11111
	7.5
0	3.88889
	0.833333
	1.94444
	1.94444
	6.38889
	7.22222
	10.8333
	6.94444
	7.77778
	6.94444
3	5.27778
	8.05556
	2.22222
	3.88889
	2.22222
	5.27778
	4.16667
	3.61111
	3.88889
	4.44444
6	6.38889
0
15
30 sec

## Sheet: I - % Head dish
		#	%
Excitatory		18	7.59494
Inhibitory		18	7.59494
No changes		201	84.8101
Total		237

## Sheet: J - Dish entry responses
Time/# neurons	1	2	3	4	5	6	7	8	9	10	11	12	13	14	15	16	17	18	19	20	21	22	23	24	25	26	27	28	29	30	31	32	33	34	35	36	37	38	39	40	41	42	43	44	45	46	47	48	49
-6	0.795186	-0.811301	-0.0117945	-0.482382	-0.872763	-0.45381	0.735787	-0.899172	-0.348991	-0.928375	-0.77759	0.259672	0.54388	1.52599	-1.26216	-0.802748	0.13924	-0.158346	-0.0245282	1.14816	-1.31574	0.022439	-0.0264179	0.155144	0.789026	-0.901184	0.953331	-0.344938	0.411867	0.604958	-0.456658	-1.13149	-1.09257	0.365871	-0.576286	-0.0253445	0.691361	1.00875	-0.517664	1.01561	1.55014	-0.193127	1.24547	0.0627559	0.831325	1.73696	-0.467619	1.41588	0.146389
	-0.604342	-0.2318	-0.247687	2.36806	-0.872763	-0.45381	-0.0188663	-0.449586	1.04697	-0.354122	0.871843	-1.13856	0.444993	-1.56723	-1.00192	-0.131248	1.53164	-1.21398	1.44718	1.14816	-1.03947	-0.618676	0.501939	-1.97809	0.324893	-0.901184	-0.334954	-0.991698	-1.1655	0.208265	2.58773	-1.13149	-1.5676	-0.495001	-0.910365	0.734981	0.197532	-0.567421	-1.26868	1.63112	-0.612847	0.0340811	-1.6287	0.0627559	-0.431447	-0.306523	0.337552	-0.839505	0.910159
	-0.731572	-0.811301	-0.483579	0.613941	-0.487012	-0.494879	-0.584857	-0.449586	-0.348991	-0.928375	-0.0706899	-0.339572	0.148331	-0.329944	-1.00192	-0.436475	0.13924	-1.21398	-2.47738	0.941285	0.203749	-1.19568	-0.730893	0.736934	1.25316	-1.29089	0.695674	0.0862344	0.411867	-0.585123	-0.456658	0.895056	0.332521	1.22674	-0.409247	0.481539	-0.296298	1.63922	-1.16139	-0.584743	-0.612847	-0.761146	-0.191612	-0.495073	0.199939	-1.32826	-0.467619	-0.839505	1.16475
	-0.349882	0.154534	-0.483579	0.394676	-0.390574	-0.12526	-0.584857	-0.899172	-0.348991	-0.54554	-1.24886	-0.539319	2.42274	-0.329944	-0.221203	-0.192293	-0.324893	1.42511	0.220756	1.04472	-0.486927	-1.25979	-1.08313	-0.814506	0.789026	-0.998609	-0.592611	2.02651	-0.289183	-0.783471	1.06554	-1.97588	-0.617539	0.365871	-0.743326	-1.54599	1.3498	-0.567421	-0.624952	-1.44647	-1.33384	-0.87475	0.766447	-0.355616	1.25225	-1.32826	-0.839236	0.664086	1.92852
	0.159038	-1.58397	-0.955363	0.613941	0.0916161	-0.166329	-0.77352	-1.34876	-0.348991	0.0287125	-1.72012	-0.539319	0.148331	0.494916	-1.00192	0.296071	1.06751	-0.158346	0.466041	0.527533	-0.00345341	-1.45213	2.61537	0.930864	0.324893	-1.87544	0.953331	1.81093	-1.34076	-0.783471	-0.456658	1.57057	-0.617539	-0.925438	0.425951	0.734981	0.691361	0.693515	-0.624952	-0.338535	-1.33384	-0.193127	-0.670641	-0.0767013	-0.0105234	-1.32826	-0.529555	-1.3407	1.29204
	-0.986031	0.927201	-0.247687	-0.920911	-0.872763	-0.166329	0.169797	2.24793	-0.348991	-0.928375	-1.24886	-0.339572	0.741654	-1.1548	-1.00192	0.112934	-0.789026	0.369473	0.711326	0.734409	-0.141588	-0.169896	-0.202537	-1.20237	-0.603372	-0.901184	1.21099	-0.344938	0.411867	1.2	-0.456658	-0.62485	-0.142509	-0.925438	2.7645	-0.278785	-0.296298	-0.882654	-1.26868	-0.707847	-0.612847	-0.761146	-0.670641	0.481127	-1.06283	-0.306523	-1.02504	-1.3407	0.146389
	-0.0954224	0.154534	-0.483579	-0.263117	-0.969201	-0.207398	-0.396193	-0.899172	-0.348991	-1.11979	0.164944	-0.339572	-0.247218	1.31978	-0.481441	-0.0702024	-0.789026	0.369473	-1.98681	0.630971	-0.141588	-0.36223	-1.08313	-0.232716	-1.06751	-0.414058	-1.8809	-0.344938	-1.1655	2.98512	2.58773	-0.793729	0.332521	0.365871	-0.576286	0.988421	0.855971	1.32398	-0.303088	-0.338535	-0.612847	-1.10196	1.24547	1.03896	-0.852371	-0.306523	-0.7773	0.413487	0.782864
	-0.731572	0.154534	0.931774	-1.5787	-0.197698	-0.248466	2.81108	0.899172	-0.348991	-0.928375	0.400576	-0.139824	0.939429	-1.1548	0.0390358	-0.741702	-0.324893	-1.21398	0.466041	-0.506846	-0.486927	-1.13157	-0.730893	0.930864	0.324893	-0.0243565	-0.0772975	1.59534	-0.639709	-1.57686	-0.456658	-0.287094	-0.617539	0.796307	-0.0751681	0.481539	2.83129	0.378281	-0.249444	0.523191	0.829146	-0.988354	-0.191612	0.481127	-1.06283	-0.306523	-0.0960011	0.413487	-0.108201
	-1.49495	-1.00447	-0.719471	0.833205	-0.10126	-0.700223	0.735787	0.899172	-0.348991	-0.162705	-1.01322	-0.938815	0.939429	1.73221	-0.481441	-1.29111	-1.25316	-1.21398	0.956611	-0.093094	-1.93735	0.0865506	-0.202537	-0.426646	0.324893	0.0730689	-0.334954	1.16417	0.236604	0.00991711	-0.456658	0.38842	0.807551	-0.495001	-1.0774	-0.785669	0.362142	2.26968	0.608859	1.38492	0.108149	-1.44277	0.766447	0.481127	-0.852371	-0.306523	0.523361	0.162889	1.03745
	-1.49495	-1.00447	-0.129741	-0.482382	0.0916161	-1.06984	-0.77352	0.899172	-0.348991	-0.162705	1.10748	0.0599244	1.33498	-1.1548	0.299274	-1.04693	-1.25316	-0.686163	0.220756	0.837847	-0.763197	-0.426342	1.0303	1.31872	0.324893	-0.608908	-1.36558	-0.776111	-1.51602	-0.585123	1.06554	-0.287094	-0.142509	2.08762	0.76003	-0.278785	0.362142	-1.19789	0.0187755	0.030776	-1.33384	-0.420335	-0.191612	0.899498	0.199939	-0.306523	1.94789	1.66648	-0.108201
	-0.731572	-0.0386333	-0.955363	-0.0438527	-0.487012	-0.248466	-1.52817	-0.449586	-0.348991	0.602965	-0.77759	-0.339572	-1.23609	0.0824861	0.0390358	-0.436475	1.53164	-0.686163	-0.0245282	0.010344	-0.210656	-0.682788	0.501939	0.155144	-1.06751	0.365345	0.695674	-0.560525	0.411867	0.406611	-0.456658	0.895056	-0.617539	0.365871	1.26115	0.228097	-0.131688	-0.252187	0.823435	-0.584743	-0.612847	0.829309	-0.670641	-1.33182	-0.220985	0.71522	0.0898075	0.664086	-1.12656
	-0.0954224	0.3477	-0.955363	0.175412	-0.679887	0.326497	0.924451	-8.9e-07	-0.348991	-0.736957	-0.306324	0.259672	-0.148331	-0.123729	0.559513	0.84548	-0.324893	-0.158346	-0.760383	-0.403408	0.272817	0.599443	-0.378655	-0.814506	-1.53164	0.755046	0.953331	-0.344938	0.411867	-0.386777	-0.456658	-0.793729	1.28258	-1.35587	-1.0774	-0.0253445	-0.625517	0.378281	0.769791	0.892502	1.55014	0.715705	-1.14967	-0.0767013	-0.641909	-1.32826	1.76209	0.664086	-0.617381
	0.159038	0.3477	-0.365633	-0.0438527	0.188054	0.860392	0.924451	-0.449586	3.8389	-0.354122	1.10748	0.45942	-0.346105	-0.329944	0.299274	1.57803	-0.789026	1.95293	-0.0245282	-0.196532	1.23976	1.04822	-0.730893	1.70658	-1.06751	0.46277	-0.0772975	1.16417	1.46344	1.2	-0.456658	-0.287094	0.332521	-1.35587	-0.242207	-0.278785	-0.625517	-0.567421	0.716147	-0.0923276	0.829146	0.374893	0.287418	-0.913444	-0.431447	0.71522	1.39047	-0.839505	0.146389
	0.795186	1.31353	-0.129741	-1.5787	0.477368	1.06574	-0.20753	1.34876	-0.348991	0.0287125	0.871843	0.45942	-1.43387	0.701131	0.819751	2.24953	-0.324893	1.42511	-0.0245282	-0.81716	0.894425	0.022439	-0.378655	0.930864	-0.139239	0.26792	0.438017	-0.560525	0.762393	-0.783471	-0.456658	-0.118215	-0.142509	1.22674	-1.24444	-1.54599	-0.625517	-1.19789	-0.0348685	-0.707847	1.55014	-0.533939	-0.191612	0.481127	-0.0105234	1.73696	1.2666	-1.5913	0.0190942
	-0.349882	0.540867	1.40356	-1.35944	0.766682	-0.166329	0.169797	-0.449586	-0.348991	1.94289	-0.0706899	0.259672	-0.444993	-0.536159	-0.74168	1.02862	0.13924	-0.158346	-0.515098	-1.12747	0.75629	0.150662	-1.43537	0.736934	1.25316	1.24217	-0.850268	-0.991698	0.762393	-0.783471	-0.456658	0.219542	-0.617539	-0.925438	0.59299	0.228097	0.032922	-0.252187	-1.37597	0.892502	0.108149	-0.533939	-0.670641	1.8757	-0.220985	-0.306523	0.833042	0.664086	-0.36279
	0.413497	0.734034	0.342043	-0.0438527	-0.0048218	-0.905567	0.169797	0.899172	1.04697	-0.162705	0.63621	-0.339572	-0.741654	0.701131	-0.74168	-0.253339	2.45991	-0.686163	0.220756	-1.7481	-0.694129	0.407108	-0.0264179	0.543004	-0.603372	0.560196	-1.62324	-0.776111	-0.639709	0.208265	-0.456658	1.06394	2.23264	-1.35587	-0.409247	0.734981	-1.28396	-0.252187	-0.839528	-0.338535	0.829146	0.261289	0.287418	1.59678	1.04179	0.71522	-1.33473	0.162889	-0.235495
	1.17688	1.12037	-0.247687	0.613941	0.188054	-1.06984	-0.0188663	-0.899172	-0.348991	1.56005	1.57874	-0.139824	-0.741654	-1.36102	1.60047	-1.35216	0.603372	-0.686163	1.2019	-1.23091	-0.486927	2.84335	1.55865	-0.038786	-1.53164	1.14475	-0.334954	-0.129351	-0.814971	-0.783471	-0.456658	1.90833	1.28258	-0.0645661	-0.409247	-0.532227	-0.625517	-0.567421	2.0036	-1.20026	0.829146	0.602101	-1.14967	-0.63453	2.51502	-0.306523	-1.21085	0.914684	-0.999265
	0.159038	0.540867	-0.0117945	-0.0438527	-0.10126	-0.45381	-0.962183	-0.449586	-0.348991	2.1343	0.400576	-0.339572	0.247218	0.907346	0.299274	-1.23007	-0.789026	0.897292	0.956611	-1.12747	1.51603	0.727666	-0.554774	-0.038786	-0.603372	2.02158	-0.850268	-0.991698	1.46344	0.00991711	-0.456658	0.895056	-1.5676	1.22674	0.258911	1.24186	-1.28396	-1.51312	1.46716	-1.93888	-1.33384	2.53337	-0.191612	-2.0291	1.67317	1.73696	-0.28181	0.914684	-1.12656
	2.44917	-2.35664	0.342043	-0.482382	0.573806	1.51749	0.735787	-0.899172	-0.348991	1.36863	1.34311	-0.139824	-1.43387	0.907346	1.86071	0.84548	0.13924	0.369473	-1.25095	-1.33435	2.20671	0.407108	1.20641	-1.20237	0.324893	1.24217	0.695674	-0.991698	-0.990234	-0.18843	-0.456658	-0.793729	-0.142509	-0.495001	0.258911	1.74875	-1.44857	0.378281	1.46716	1.38492	0.108149	1.85174	0.287418	0.0627559	-0.852371	-0.306523	-1.02504	-1.3407	-0.617381
0	1.55857	1.5067	3.40864	1.71026	3.65982	3.16025	-1.52817	1.34876	-0.348991	-0.354122	-1.24886	3.85513	-1.1372	-0.329944	2.12094	1.02862	-0.789026	1.42511	0.220756	1.56191	0.618155	0.984112	0.149701	-1.3963	2.18143	-0.219207	1.7263	0.301821	1.81397	0.406611	-0.456658	0.38842	1.28258	0.365871	1.42819	-2.30632	-0.131688	-0.252187	0.394283	0.523191	0.108149	0.602101	2.68256	-1.61073	-1.06283	0.71522	-0.0960011	-0.588906	-2.27221
	11.4825	3.43837	3.52659	2.58732	2.98475	3.612	2.62242	2.24793	-0.348991	1.94289	4.17071	3.85513	1.53275	2.9695	2.38118	1.76116	2.92404	1.42511	1.44718	0.837847	1.7923	2.84335	1.38253	2.87017	0.324893	1.3396	1.46865	0.732994	1.28818	0.406611	-0.456658	-0.287094	1.75761	2.08762	1.59523	0.988421	0.526751	0.378281	0.340639	0.030776	0.108149	-0.193127	0.766447	0.481127	0.831325	-0.306523	0.833042	0.914684	-0.617381
	9.06513	5.17687	4.23426	4.99923	3.46694	2.50314	3.37707	2.69752	5.23487	2.89997	0.63621	0.659168	2.81829	1.31978	1.60047	2.06639	0.603372	1.95293	1.69247	2.28598	1.1707	0.022439	1.38253	-0.232716	2.18143	1.14475	0.953331	1.59534	0.937655	1.79504	2.58773	2.41496	0.332521	-0.0645661	0.425951	0.988421	1.18519	1.32398	1.35987	1.63112	1.55014	1.73814	0.766447	1.03896	0.620863	1.73696	0.523361	0.413487	1.92852
	2.19471	1.69987	1.40356	4.5607	1.24887	1.68177	1.49044	5.84462	2.44294	0.22013	4.17071	0.45942	2.02719	0.0824861	0.819751	0.967571	-1.25316	1.95293	2.42832	0.941285	0.0656142	0.855889	2.26313	-0.232716	0.324893	1.63187	0.695674	-0.560525	1.11292	1.00165	-0.456658	-0.287094	0.332521	0.365871	-0.743326	0.734981	-0.460907	-0.252187	0.877079	1.13871	2.99214	-0.193127	-0.191612	1.59678	-0.641909	0.71522	-0.157937	0.413487	1.16475
	2.44917	2.85887	1.16767	6.97261	0.766682	0.162222	2.43376	5.84462	6.63083	-0.162705	2.05001	-1.13856	0.642767	-0.536159	0.299274	-0.741702	1.53164	-0.158346	-1.00567	0.21722	-0.763197	-1.58035	0.32582	0.349074	-1.06751	2.119	-1.36558	-1.42287	0.0613422	-1.18016	-0.456658	1.23281	-1.09257	2.51805	-0.409247	2.50907	1.67902	2.90015	0.501571	0.276984	0.829146	0.374893	1.24547	1.31787	-0.641909	-1.32826	0.0278712	-0.338308	1.03745
	3.8487	1.89304	1.40356	3.68364	0.0916161	-0.248466	0.924451	6.29421	5.23487	0.22013	2.28564	0.0599244	0.840542	1.73221	1.07999	-1.4132	4.31644	0.897292	1.93775	-0.81716	-0.625062	-0.426342	-1.08313	1.90051	0.789026	2.31385	0.438017	1.59534	0.937655	0.406611	-0.456658	-0.287094	-0.142509	1.65718	1.42819	1.24186	1.67902	4.47632	0.662503	1.63112	2.27114	0.602101	-1.14967	1.17841	2.30456	1.73696	0.151744	-0.0877091	1.54663
	1.81303	1.31353	1.28561	2.36806	0.573806	-0.535948	3.56574	6.74379	-0.348991	1.56005	1.57874	0.0599244	0.642767	0.701131	-0.221203	-0.863794	1.53164	1.95293	0.711326	-1.7481	-0.763197	0.984112	0.149701	-0.232716	-0.603372	1.24217	2.49927	0.94858	-0.639709	-0.981818	-0.456658	0.38842	1.75761	0.365871	0.927069	0.228097	-1.77779	2.90015	-0.249444	1.01561	0.108149	1.17012	-0.670641	0.481127	-0.0105234	-1.32826	-0.0340649	0.413487	1.67393
	1.6858	2.85887	1.7574	3.90291	0.38093	-0.207398	2.43376	4.04627	-0.348991	1.75147	2.75691	-0.139824	0.444993	3.17571	1.07999	-0.436475	1.99577	-1.21398	-0.269813	-1.54122	-0.417859	0.92	1.73477	0.155144	-1.53164	0.365345	2.24162	0.0862344	-0.464446	-1.57686	1.06554	-0.62485	1.28258	3.37893	1.59523	0.734981	-0.460907	1.95445	0.716147	-1.07716	0.829146	1.05652	-0.670641	1.03896	1.25225	-1.32826	-0.715364	-0.839505	0.400979
	1.43134	1.5067	1.5215	3.68364	0.0916161	-0.618086	0.35846	4.04627	-0.348991	1.36863	-0.77759	0.259672	-0.444993	0.701131	0.0390358	-0.253339	0.13924	1.42511	-0.515098	-1.23091	0.272817	1.62523	2.08701	0.349074	1.25316	1.7293	0.18036	2.67327	-1.86655	-0.783471	-0.456658	-1.13149	0.332521	2.94849	-0.576286	0.734981	-0.460907	3.53062	0.340639	0.15388	2.27114	0.0340811	-0.191612	0.0627559	1.67317	0.71522	-0.529555	-0.338308	0.782864
	1.04965	1.69987	1.28561	1.71026	-0.0048218	0.121153	1.30178	7.19338	2.44294	1.94289	1.10748	-0.539319	-0.346105	0.288701	1.34023	0.296071	-0.789026	0.369473	1.2019	-0.403408	1.65417	-0.36223	-0.202537	0.543004	-1.06751	1.24217	1.21099	0.0862344	-1.86655	0.803306	-0.456658	-1.30036	-0.617539	0.796307	-0.576286	1.4953	-0.131688	5.10679	0.823435	-0.461639	-1.33384	0.488497	-1.14967	-0.0767013	1.04179	0.71522	0.0278712	-0.338308	1.41934
	0.413497	0.154534	1.16767	0.833205	-1.06564	0.408635	2.05643	6.29421	8.0268	0.602965	-0.306324	0.659168	0.148331	0.907346	1.34023	0.173979	1.06751	0.897292	1.44718	-0.713722	0.272817	-0.554564	0.501939	1.51265	1.25316	1.04732	0.18036	0.0862344	-0.639709	1.39835	1.06554	-0.793729	-0.617539	-0.0645661	-1.0774	1.4953	1.18519	2.58492	0.447927	-0.338535	2.99214	1.05652	-1.6287	-0.355616	0.410401	-0.306523	-0.343746	0.413487	2.4377
	0.413497	-0.2318	1.40356	0.394676	-0.58345	0.655048	1.86777	4.94545	1.04697	0.22013	1.57874	0.0599244	0.148331	1.93842	0.819751	0.0518887	1.99577	0.897292	1.2019	-1.33435	0.203749	0.663554	-0.0264179	-0.232716	-0.139239	0.657621	1.21099	0.0862344	-0.113921	-1.97355	2.58773	-0.62485	-0.617539	-0.495001	-0.910365	0.481539	0.526751	4.79156	0.447927	-0.584743	0.108149	0.261289	-1.14967	0.34167	1.25225	1.73696	-0.467619	2.16768	2.18311
	2.06748	-1.00447	1.28561	-0.482382	-0.679887	1.14787	1.6791	3.59669	1.04697	1.75147	1.10748	-0.539319	1.53275	1.93842	1.07999	-0.497521	1.06751	-0.686163	-1.98681	-0.403408	-0.141588	1.81756	2.79149	-0.426646	-1.53164	1.43702	1.98396	0.0862344	-0.113921	0.803306	-0.456658	1.06394	0.332521	3.37893	-1.9126	1.24186	0.691361	0.693515	-0.249444	1.75423	0.829146	0.147685	-1.14967	-0.355616	0.620863	0.71522	-0.0960011	-0.0877091	2.3104
	0.159038	-1.00447	1.7574	2.14879	-1.45139	0.655048	2.05643	5.84462	1.04697	0.794382	0.164944	0.0599244	0.148331	-0.123729	1.34023	-0.924839	3.38817	-0.686163	-0.760383	0.527533	-0.210656	-0.746899	0.854177	0.349074	1.71729	1.92415	0.953331	-0.776111	-0.639709	-0.386777	1.06554	0.726178	-0.142509	-0.925438	0.425951	-0.785669	-0.131688	2.58492	0.286995	-0.0923276	0.829146	-0.647542	-0.670641	0.481127	0.410401	-0.306523	-0.219874	0.162889	4.09253
	2.44917	-0.811301	0.931774	2.14879	-1.64427	-0.207398	3.37707	4.04627	-0.348991	-0.162705	0.63621	-0.139824	-1.03832	-0.123729	1.07999	-0.680657	2.92404	1.42511	0.466041	-0.81716	0.203749	0.984112	-0.0264179	0.543004	0.789026	1.24217	-0.0772975	-1.20728	-1.51602	0.00991711	-0.456658	0.38842	-0.617539	-0.0645661	-0.409247	2.50907	0.691361	1.63922	-0.142157	-0.954054	2.99214	-1.32917	2.68256	0.0627559	-0.220985	-1.32826	0.0278712	0.162889	2.4377
	2.5764	-2.16347	0.577936	-0.0438527	-1.45139	-0.084191	0.547124	2.24793	-0.348991	-0.162705	0.164944	-0.739067	-0.54388	-0.948589	0.559513	-0.741702	5.70884	-0.686163	-0.760383	0.010344	0.825358	1.11233	-0.0264179	0.736934	0.324893	-0.121782	-0.0772975	-0.560525	-1.51602	-0.783471	-0.456658	2.07721	-0.617539	0.796307	-2.24668	0.988421	2.17285	1.00875	1.62809	-0.215432	-0.612847	-0.647542	-0.191612	0.34167	-0.641909	2.7587	-0.529555	-0.839505	3.07417
	1.81303	-0.618134	0.695881	-1.5787	-0.872763	-0.207398	2.24509	2.24793	5.23487	-0.162705	0.63621	0.45942	-1.03832	0.494916	0.559513	-0.619612	4.78057	-0.686163	-1.74152	-0.093094	-0.210656	0.984112	0.678058	0.543004	-1.99577	0.46277	0.953331	-0.344938	0.937655	-0.386777	1.06554	2.41496	1.28258	1.65718	-0.743326	0.228097	2.50207	1.32398	0.233351	0.892502	0.108149	-0.647542	-1.14967	-1.88964	1.25225	-0.306523	-0.653427	0.162889	2.05581
	-0.604342	-1.58397	1.5215	0.613941	-1.16208	-0.084191	3.7544	-0.449586	9.42276	0.9858	-0.0706899	-1.53806	0.346105	-1.97966	0.0390358	-0.619612	6.17297	0.369473	-1.98681	-0.920597	-0.555994	-0.426342	-0.202537	-0.814506	-1.06751	-0.219207	1.46865	0.301821	-0.814971	-0.18843	4.10992	-0.962608	0.332521	-2.21675	-2.7478	1.4953	1.67902	1.95445	0.286995	-0.707847	-0.612847	-0.533939	1.24547	-0.216159	-0.220985	-1.32826	0.0278712	-0.0877091	3.20147
	1.55857	-1.3908	0.695881	-0.701647	-1.06564	0.326497	0.35846	-0.449586	8.0268	-0.354122	0.63621	0.45942	0.444993	-1.77345	-0.221203	-0.924839	2.45991	-1.21398	0.956611	-1.02404	-0.555994	-0.426342	-0.378655	1.31872	-1.06751	-1.29089	1.46865	-0.344938	0.937655	-0.386777	4.10992	2.58384	0.807551	1.65718	0.258911	-0.278785	1.84363	1.95445	0.823435	0.030776	-1.33384	-1.21556	-0.191612	0.481127	1.67317	-1.32826	-0.28181	-2.0925	2.3104
	0.795186	-1.3908	1.99329	5.21849	-1.06564	0.655048	2.24509	1.34876	10.8187	-0.736957	0.164944	-0.539319	-0.54388	1.31978	0.559513	-0.680657	3.8523	1.42511	-0.515098	-0.920597	0.618155	-2.47791	1.0303	1.51265	-0.139239	-1.68059	-0.334954	-1.63846	0.58713	0.604958	5.63211	-1.13149	-0.617539	-0.495001	-0.409247	2.50907	2.00824	0.0630469	0.447927	0.15388	1.55014	-0.0795226	-1.6287	-1.0529	0.199939	-0.306523	-0.715364	-1.3407	2.81958
6	2.83086	-1.9703	0.459989	1.27173	-1.25852	0.408635	2.62242	2.69752	3.8389	0.794382	0.164944	-0.739067	0.346105	-0.123729	0.299274	-0.863794	2.92404	1.42511	-1.98681	-0.920597	-0.763197	-1.13157	0.678058	0.736934	0.324893	-0.608908	-0.592611	-0.991698	0.236604	1.59669	5.63211	1.57057	-1.09257	3.37893	-1.24444	-0.0253445	2.00824	0.0630469	-0.0348685	0.030776	4.43413	-0.306731	-0.670641	-1.33182	2.30456	-1.32826	-0.7773	-0.338308	3.20147
[truncated: 186 more columns]

## Sheet: K - Exc Zscore time cours
Time	Time course	SEM
-6	-0.10364	0.163502
	0.017539	0.294407
	-0.33746	0.117381
	-0.23376	0.203008
	-0.32279	0.201014
	-0.3192	0.211025
	-0.14037	0.204162
	-0.00967	0.246348
	-0.18857	0.210616
	-0.13464	0.220276
-3	-0.33067	0.162741
	-0.13099	0.119755
	0.416962	0.257919
	0.196367	0.199846
	0.107087	0.181868
	0.316558	0.18156
	0.242347	0.256541
	0.062305	0.169519
	0.13688	0.280543
	0.75572	0.436561
0	3.04471	0.577984
	2.89274	0.547407
	1.58004	0.430124
	1.66586	0.600287
	1.86656	0.480963
	1.28598	0.407642
	1.59085	0.330117
	0.802011	0.322693
	1.01048	0.429183
	1.29955	0.536386
3	1.04842	0.312457
	0.913865	0.293131
	0.906232	0.404111
	0.728181	0.382668
	0.373869	0.416575
	0.92903	0.430192
	1.01189	0.71126
	0.790766	0.539409
	1.6001	0.74764
	1.08363	0.466749
6	0.45065	0.337917

## Sheet: L - Exc example time cour
Time	Time course
-6	9.44444
	6.38889
	6.11111
	6.94444
	8.05556
	5.55556
	7.5
	6.11111
	4.44444
	4.44444
-3	6.11111
	7.5
	8.05556
	9.44444
	6.94444
	8.61111
	10.2778
	8.05556
	13.0556
	11.1111
0	32.7778
	27.5
	12.5
	13.0556
	16.1111
	11.6667
	11.3889
	10.8333
	10
	8.61111
3	8.61111
	12.2222
	8.05556
	13.0556
	13.3333
	11.6667
	6.38889
	11.1111
	9.44444
	13.8889
6	17.2222
0
15
30 sec

[truncated: 3 more sheets: M - Inh Zscore time cours, N - Inh example time cour, O - % responsive neurons]
