# Supplementary material for: Neural correlates and determinants of approach–avoidance conflict in the prelimbic prefrontal cortex
Source: eLife. 2021 Dec 16;10:e74950. doi: 10.7554/eLife.74950 (PMC8853658; doi:10.7554/eLife.74950)
Supplement: Figure 2—figure supplement 4—source data 1. [file elife-74950-fig2-figsupp4-data1.xlsx]

## Sheet: B - Neurons % Pressers
	Excited	Inhibited during Reward	No change
Reward	23	32	45
Odor	21	27	52
Conflict	18	32	50

## Sheet: C - Neurons % NonPressers
	Excited	Inhibited during Reward	No change
Reward	25	31	44
Odor	13	36	51
Conflict	27	29	44
