# Supplementary material for: Neural correlates and determinants of approach–avoidance conflict in the prelimbic prefrontal cortex
Source: eLife. 2021 Dec 16;10:e74950. doi: 10.7554/eLife.74950 (PMC8853658; doi:10.7554/eLife.74950)
Supplement: Figure 2—source data 1. [file elife-74950-fig2-data1.xlsx]

## Sheet: 2C - Changes food responses Pre
Reward phase	Percentage	Nr neurons		Conflict phase	Percentage	Nr neurons
Excitated	20	48		Excitated	11	25
Inhibited	13	31		Inhibited	3	7
No change	67	158		No change	86	204
Nr neurons	237

## Sheet: 2D - Heatmap Conflict Pressers
	PL	PL	PL	PL	PL	PL	PL	PL	PL	PL	PL	PL	PL	PL	PL	PL	PL	PL	PL	PL	PL	PL	PL	PL	PL	PL	PL	PL	PL	PL	PL	PL	PL	PL	PL	PL	PL	PL	PL	PL	PL	PL	PL	PL	PL	PL	PL	PL	PL
	EXPJF20 1O1	EXPJF20 1O1	EXPJF20 1O1	EXPJF20 1O1	EXPJF20 1O1	EXPJF20 1O1	EXPJF20 1O1	EXPJF20 1O1	EXPJF20 1O1	EXPJF20 1O1	EXPJF20 1O1	EXPJF125 1G2	EXPJF125 1G2	EXPJF125 1G2	EXPJF125 1G2	EXPJF125 1G2	EXPJF125 1G2	EXPJF123 4G2	EXPJF123 4G2	EXPJF123 4G2	EXPJF123 4G2	EXPJF123 4G2	EXPJF123 4G2	EXPJF123 4G2	EXPJF123 4G2	EXPJF123 4G2	EXPJF123 4G2	EXPJF123 4G2	EXPJF123 4G2	EXPJF123 4G2	EXPJF123 4G2	EXPJF123 4G2	EXPJF123 4G2	EXPJF123 4G2	EXPJF166 5M2	EXPJF166 5M2	EXPJF166 5M2	EXPJF166 5M2	EXPJF166 5M2	EXPJF166 5M2	EXPJF166 5M2	EXPJF166 5M2	EXPJF166 5M2	EXPJF166 5M2	EXPJF166 5M2	EXPJF166 5M2	EXPJF166 5M2	EXPJF166 5M2	EXPJF184 8T2
	SPK08a	SPK17a	SPK18a	SPK19a	SPK20a	SPK21a	SPK22a	SPK23a	SPK27a	SPK31a	SPK31b	SPK01a	SPK01b	SPK02a	SPK05a	SPK05b	SPK11a	SPK05a	SPK05b	SPK06a	SPK07a	SPK07b	SPK12a	SPK14a	SPK14b	SPK15a	SPK15b	SPK18a	SPK19a	SPK19b	SPK20a	SPK20b	SPK22a	SPK22b	SPK01a	SPK07a	SPK15a	SPK16a	SPK18a	SPK18b	SPK19a	SPK19b	SPK21a	SPK23a	SPK24a	SPK25a	SPK27a	SPK32a	SPK21a
-30	-0.334158	0.374385	-1.31245	-0.380144	-1.90113	-0.801361	-1.95822	-1.72625	-0.41586	-1.12451	-0.864053	-1.7193	-0.862109	0.154009	-2.4067	-2.2319	-1.0363	-0.469227	0.0941967	3.23845	0.19505	0.99846	-0.793096	-0.748673	-0.828157	-0.512527	-0.81389	-0.834474	0.0849227	-1.27507	-1.92967	0.557196	-0.039317	0.613372	0.803729	0.073481	-0.582681	0.292427	2.92959	0.730794	0.348107	-0.106542	-0.220664	0.678908	-0.397946	-1.18761	0.366881	0.214452	-1.3438
-29.7	-1.26669	-1.18555	-0.293072	-0.672563	0.75161	-0.315687	-1.95822	-1.51951	-1.75735	-0.516665	-0.864053	-1.1089	-1.67351	1.93727	-3.00557	-1.6102	-0.726958	1.19577	0.0244215	1.66639	-0.80288	-0.656447	0.829146	-0.530613	-0.370612	-0.0277043	-0.660326	0.0848618	-0.223887	-0.473598	2.35849	0.33725	-0.039317	0.252565	-0.106153	-1.02873	-0.99158	2.30286	1.83237	-0.540152	0.854445	1.07726	-1.4816	0.363136	-0.848452	-0.107966	0.533646	0.709342	-1.53441
-29.4	-0.800426	1.31035	-0.802763	0.204692	1.4148	-0.801361	-1.95822	-2.13972	-1.6232	-0.820585	-0.864053	-1.31236	-1.06496	0.154009	-3.08043	-0.9885	-1.34565	0.287591	-1.23154	1.66639	-0.893601	0.557152	-2.41534	0.196254	-0.462121	-0.581788	-1.04424	0.0141436	-1.30472	-0.692181	-1.07204	-0.762479	1.00914	0.252565	2.01691	0.073481	-0.378231	-0.43864	1.61292	0.730794	0.474691	1.07726	-0.693515	-0.584176	-0.698284	-0.107966	1.36747	0.874305	-1.91563
-29.1	0.287532	-1.49754	-1.5673	0.497111	-0.795823	2.11268	0.0605633	0.547851	-0.952455	0.243136	-0.864053	-1.92276	-0.253562	-0.49445	-2.70614	-0.615481	-1.96433	1.72554	0.373299	0.408736	-0.621438	-0.435792	-0.432598	-0.457926	-1.01118	-1.27439	-0.42998	-0.127293	-0.0694824	0.0364306	0.398186	1.73024	2.05759	-0.108242	1.71361	-0.906264	0.439566	-0.621407	-0.142639	-1.17563	0.854445	2.0243	-0.220664	0.0473661	-0.247778	2.05134	-0.967232	-0.280437	0.943521
-28.8	1.06464	-0.24959	-1.5673	-0.672563	-0.795823	0.655658	-1.95822	-1.51951	-1.48905	0.0911759	-0.864053	-0.905428	-0.45641	0.802468	-2.18213	-0.491142	-1.96433	2.55804	1.28038	1.03756	-1.07504	-0.435792	1.36989	-0.312553	-0.00457534	-1.13587	-1.12102	0.50917	1.93778	1.20221	0.643224	1.29035	0.747025	0.613372	1.41032	-0.0489871	1.66626	1.02349	0.515696	-1.17563	0.348107	-1.05358	1.98597	-0.899948	-2.19997	-0.647789	-0.133412	-1.60014	-0.771973
-28.5	2.1526	-0.561577	-1.82214	-0.964981	2.74117	0.169986	-1.95822	-1.72625	-2.29394	1.9147	-0.864053	-0.701961	-0.0507124	-0.00810583	-2.93071	-0.491142	-0.417614	0.438954	0.512849	0.723149	0.104329	-0.435792	-0.252348	-0.312553	0.635988	-0.0277043	-0.0460691	-0.905192	0.702542	-1.56651	0.0306295	-0.175957	0.09174	-0.0180404	0.197141	1.05323	-0.378231	-1.71801	3.14904	-0.222415	-0.0316463	-0.106542	0.252187	-1.53149	0.202728	-0.647789	0.0333527	-1.27022	-1.3438
-28.2	-0.178736	0.0623972	2.00054	-0.672563	1.4148	-0.315687	-2.76574	-0.48583	-1.22075	-0.212744	-0.442563	-0.905428	-1.06496	-1.79137	-1.05925	-0.118123	-0.108271	1.57418	0.443074	0.408736	-0.349275	-0.435792	-0.252348	-0.312553	0.544479	-0.374006	-1.04424	-0.480883	-0.532697	-0.327875	-0.827002	1.14372	0.878081	0.162363	-0.712741	0.808289	-0.787131	-1.53524	0.735141	-1.17563	-0.284815	-1.05358	0.409804	-0.584176	-1.5993	1.51151	-0.133412	-0.610363	0.37169
-27.9	-1.57754	0.0623972	-1.82214	-0.672563	-0.353699	-0.801361	-2.36198	-1.31277	-0.818306	0.0911759	-0.864053	-1.31236	-0.862109	-0.980794	-1.35868	0.503576	-1.0363	0.590317	-0.25468	3.23845	-0.0771128	0.888133	0.468648	-0.530613	-0.828157	-1.20513	0.184277	-1.04663	-0.378292	0.473598	-0.704483	1.43698	1.79548	1.33499	1.71361	0.808289	-0.582681	-1.71801	0.735141	0.0953214	-0.917737	0.366978	1.67074	-2.4788	-0.397946	0.43186	-0.633704	-0.775327	1.13413
-27.6	-1.42212	1.31035	-0.547918	-0.380144	0.530548	0.655658	-2.36198	-2.13972	-0.147564	-0.668625	-0.864053	-0.498494	0.354986	-1.62925	-3.52958	-0.366802	-1.65499	1.34713	0.303523	1.03756	-0.439996	-0.656447	2.09089	0.414314	-1.65174	-0.720309	-1.12102	-0.268729	1.16576	0.837903	-0.459446	-0.762479	-0.563545	-0.0180404	-0.106153	0.808289	-1.19603	-1.53524	2.05181	-0.857889	0.348107	-2.47415	1.51312	-0.899948	-1.5993	-2.26727	1.53423	-0.610363	-0.00953019
-27.3	-0.334158	0.0623972	-1.05761	0.204692	-0.574761	2.11268	-1.95822	-2.75993	0.657328	-1.27647	-0.864053	-1.31236	-1.26781	-1.46714	-0.909532	-1.48586	0.201073	2.70941	-0.184905	-0.848914	-0.167834	-0.215138	-0.252348	-1.18479	0.727497	-0.789569	-0.42998	0.862761	-1.30472	0.0364306	-0.459446	0.997088	-0.301431	-1.19066	1.10702	0.195949	1.66626	-0.255873	1.39348	-2.44657	2.75321	2.26106	0.0945699	0.0473661	0.95357	-0.107966	0.533646	0.049489	1.51535
-27	-0.489581	0.686372	-1.31245	0.497111	0.530548	1.62701	-1.15071	-0.899302	-0.550009	-1.88431	-0.864053	-2.12623	-1.67351	0.478239	-1.28383	0.627916	0.201073	1.19577	0.443074	-1.47774	-1.43793	-1.87004	-0.0720999	0.923121	0.269952	-0.374006	-0.42998	1.21635	1.32016	-0.109292	-0.949521	1.14372	-2.26728	-1.28086	-0.712741	-1.64107	-0.582681	-0.98694	-1.45931	-0.540152	-1.04432	0.366978	0.409804	-2.4788	-0.698284	0.971685	-0.46694	-0.115474	-0.00953019
-26.7	0.132109	0.374385	-1.31245	-0.964981	0.530548	-0.801361	-2.76574	-2.55319	0.657328	-0.668625	-0.864053	1.33271	-1.47066	0.802468	-1.13411	0.876595	0.819762	0.363272	-0.045354	1.9808	-0.80288	-1.53906	-1.69434	0.559687	-0.736648	-1.89774	-0.42998	0.438452	-0.687102	0.255014	0.888262	-0.029326	-0.563545	-0.559251	0.500436	-1.1512	-0.378231	-0.804174	0.954586	0.0953214	-0.791152	-1.05358	-0.220664	-1.21572	0.503064	3.13098	0.533646	-0.445401	-0.200141
-26.4	1.22007	0.374385	-1.05761	1.08195	0.0884244	-0.801361	-2.76574	-0.48583	-0.818306	-0.516665	-0.864053	-1.31236	-0.253562	3.88265	-1.88269	1.12527	1.74779	-0.998999	-0.464007	-1.16333	-1.16576	-0.987428	-2.23509	-0.675986	-1.10268	-0.651048	1.64314	-0.622319	-0.532697	-0.983625	1.37834	-0.469218	-1.08777	-1.37107	0.803729	-1.1512	1.66626	-0.43864	-1.67875	-2.76431	-1.29749	-1.05358	0.567421	-1.84726	-0.698284	0.43186	-0.46694	-1.43518	-0.581362
-26.1	0.598376	-0.561577	-1.05761	-0.964981	-0.132638	-0.801361	-1.95822	-1.31277	1.19392	0.395096	-0.864053	-0.295027	-0.253562	3.07208	-2.93071	0.379236	0.510418	-1.30173	0.6524	-0.848914	-1.16576	-0.766773	1.18964	-1.62091	-1.19419	-2.17478	-1.42815	-0.198011	2.401	-0.910764	-0.581964	-0.835794	-1.21883	-1.28086	-0.106153	0.318417	-0.787131	0.65796	-0.800975	0.413057	-2.057	-0.816823	-0.220664	0.0473661	-1.89963	0.971685	-0.800468	-1.93007	-1.3438
-25.8	-0.489581	0.99836	-0.0382264	-0.964981	0.309486	0.169986	-1.95822	-0.692566	1.19392	1.9147	-0.864053	-2.53316	-1.06496	-0.00810583	0.0636298	-0.118123	0.510418	-1.37741	-0.394231	-0.220089	-1.3472	-2.31135	-1.33384	-1.76629	-0.645139	-1.68996	-1.1978	-0.410165	-0.378292	-1.71224	-1.92967	-1.56895	-1.21883	-2.36328	-0.712741	-0.0489871	0.644016	2.30286	-1.02042	1.684	1.61395	0.130218	-1.00875	0.0473661	-1.14879	-0.647789	-0.300175	-0.94029	-0.962583
-25.5	1.22007	0.0623972	-0.0382264	0.204692	-0.795823	0.169986	-1.55447	-1.51951	1.32807	0.699016	-0.864053	-0.905428	-1.26781	2.74785	-1.58326	-0.9885	2.67583	-0.393545	-1.09199	0.723149	-0.530717	-1.75972	-1.51409	-2.05703	-0.55363	-1.967	-1.1978	0.0848618	-0.378292	-0.400736	-0.949521	-1.71558	-0.956716	-1.46127	-0.409448	0.563353	-0.99158	-0.621407	-0.142639	-0.540152	1.74054	-2.00063	-1.16637	1.31045	-1.74946	-1.18761	1.03394	-0.775327	0.562301
-25.2	-0.178736	0.374385	0.981155	0.204692	0.75161	-0.801361	-2.76574	-0.692566	0.254882	0.0911759	-0.864053	-1.92276	-0.45641	-0.170221	-0.310663	1.00093	2.67583	-1.37741	-1.09199	-1.16333	-0.167834	-1.53906	-2.05484	1.72267	0.361461	-0.0969646	-0.42998	0.0848618	0.548137	-2.1494	-0.214408	-0.689163	-1.08777	-0.649452	-1.31933	0.563353	-0.378231	0.10966	0.296251	0.413057	0.981029	0.366978	-0.851131	-0.899948	-0.397946	-1.18761	0.200117	0.049489	0.943521
-24.9	-0.0233135	-1.49754	-0.802763	0.497111	-1.68007	-0.315687	-1.95822	-1.51951	1.32807	-0.972545	-0.864053	-2.3297	-1.26781	1.1267	-1.65812	0.00621712	1.43845	-1.68013	-0.045354	0.723149	-0.893601	-1.98037	0.288399	-0.0944928	-1.37721	-1.55143	-1.35137	0.226298	-0.995912	-2.36799	-0.827002	-1.12906	-0.563545	-1.10046	-1.01604	-0.171455	-0.582681	0.292427	0.735141	-0.540152	-0.411399	3.91838	-0.851131	-1.84726	0.803402	-0.107966	-1.134	0.214452	-0.390751
-24.6	1.06464	-1.49754	-0.802763	-0.380144	0.530548	0.169986	-2.36198	-3.38014	-1.48905	1.1549	-0.864053	-2.12623	-1.26781	1.1267	-2.48156	1.12527	1.74779	-0.0151363	-1.37109	0.408736	-1.3472	-0.766773	-1.15359	0.487001	-1.74325	-1.34365	-0.353198	0.15558	0.856948	0.983625	1.1333	0.117304	-2.00517	-2.00248	-1.01604	0.318417	-1.40048	-0.0731069	1.39348	-0.857889	-1.04432	0.603739	-0.851131	-2.79457	-0.998621	-0.647789	0.366881	-0.610363	0.943521
-24.3	-1.26669	-0.873564	-0.293072	-0.672563	0.309486	-0.315687	-1.95822	-3.38014	-1.6232	1.00294	-0.864053	-1.51583	-2.0792	-1.30502	-1.5084	-0.864161	2.67583	0.211909	-0.603557	-0.534501	-1.52865	-1.42874	0.648897	-1.18479	-0.919667	0.387859	-0.42998	0.15558	-0.0694824	-1.34793	0.398186	0.043989	-1.08777	-1.19066	-1.31933	-0.538859	-1.60493	1.38903	0.515696	0.413057	-0.917737	0.366978	1.82836	-0.268405	-0.247778	-2.26727	-0.300175	3.51371	-0.581362
-24	-0.800426	0.374385	-2.07699	-1.2574	3.84647	-0.801361	-1.15071	-1.31277	-2.02564	-0.668625	-0.864053	-1.1089	-0.0507124	-0.49445	-1.05925	-0.366802	1.12911	-1.07468	-0.324456	-0.848914	-0.984321	-0.325465	-0.612847	-1.33017	-1.10268	-1.48217	-1.81206	0.438452	-1.76794	-1.56651	-1.92967	-0.689163	-1.48094	-1.10046	-0.106153	-1.27367	0.0306672	-0.804174	-0.800975	-0.857889	-1.17091	0.366978	-0.220664	-0.584176	-0.397946	-2.26727	-1.46753	1.69912	2.08718
-23.7	-0.800426	-0.24959	0.471464	-1.54982	-0.574761	0.169986	-0.746951	-0.0723576	-1.75735	-1.42843	-0.864053	-0.498494	-1.26781	-1.46714	-2.25699	0.254896	-0.417614	-1.15036	-1.09199	-0.534501	-0.439996	-1.42874	-2.05484	-1.62091	-1.46872	-0.512527	-0.660326	0.297016	-0.532697	-1.85796	-1.19456	-1.20237	-1.21883	-1.55147	-0.106153	-0.0489871	1.05291	0.10966	-1.02042	-0.540152	-0.537984	-0.106542	1.19789	-0.268405	0.352896	-0.647789	-0.300175	2.19401	-0.00953019
-23.4	-0.645003	1.31035	-1.31245	-0.672563	-2.56432	-0.801361	-0.746951	-1.10604	-1.48905	0.243136	-0.864053	-1.51583	-0.45641	0.154009	-0.984391	0.130557	-0.108271	-1.45309	0.163972	0.408736	-0.80288	-1.42874	0.108149	-0.748673	0.269952	-1.48217	-1.35137	0.579889	-1.76794	-0.765042	-0.214408	0.410565	-1.21883	-1.73187	-0.712741	0.195949	-0.173782	-0.0731069	-0.142639	-1.49336	-1.29749	-1.5271	-0.220664	-0.899948	0.202728	-1.72744	-1.96782	-0.775327	0.37169
-23.1	-0.955848	0.0623972	-0.293072	-0.380144	-1.01688	-0.315687	-2.36198	-0.48583	-1.22075	-1.27647	-0.864053	-0.0915603	-1.06496	-0.81868	-2.55642	0.379236	0.201073	-1.8315	-2.06884	0.0943233	-1.25648	-1.87004	-0.612847	-1.40285	-2.65834	-2.24404	-0.737108	-1.68309	-2.07675	0.109292	-1.31708	-0.615848	-2.92257	-2.09268	-1.01604	-0.538859	0.644016	0.10966	-1.45931	1.04853	-0.664568	-1.29034	0.882655	0.678908	-1.74946	-1.18761	-0.633704	0.544378	1.51535
-22.8	-1.42212	0.99836	-1.05761	2.25162	-0.795823	-0.315687	-1.55447	0.134379	-0.684158	-1.27647	-0.864053	1.12924	0.354986	0.154009	-2.03241	0.379236	0.201073	-0.469227	-0.25468	0.0943233	-0.258554	-1.98037	-2.77584	-3.29271	-1.01118	-1.82848	-1.27458	-0.834474	0.393733	-0.692181	0.275667	-0.542533	-1.74306	-1.10046	-1.01604	0.685821	-0.173782	-0.98694	-1.23986	-0.222415	-0.791152	2.97134	-0.535898	-1.21572	1.40408	2.59116	-0.633704	-1.43518	0.943521
-22.5	1.53091	0.374385	-0.547918	0.204692	-0.132638	-0.315687	-2.36198	-0.48583	4.27934	0.0911759	-0.864053	1.73964	0.760684	-2.76406	-1.5084	0.130557	-0.417614	-2.05854	-0.882659	-0.848914	-1.71009	-0.546119	-1.15359	-2.63853	-1.19419	-1.82848	-1.42815	-1.82453	-1.30472	-1.49365	-1.56212	-0.982424	-0.694602	-1.10046	-1.01604	1.05323	1.25736	3.58223	-1.45931	-1.8111	-0.664568	1.55078	0.567421	-0.899948	-1.44913	-0.107966	-0.633704	0.214452	-1.15319
-22.2	-0.489581	0.686372	-1.31245	1.08195	1.85692	1.62701	0.0605633	-1.72625	0.523179	-0.820585	-0.864053	2.14658	0.760684	1.93727	-2.33185	-0.118123	-0.108271	-2.51263	-1.65019	-0.848914	-0.258554	-0.877101	-2.59559	-0.38524	-1.19419	0.387859	-0.81389	-0.268729	-0.841507	-2.29513	0.275667	-0.762479	-0.301431	-0.469049	-0.712741	-1.27367	-1.40048	1.02349	0.0768055	-0.222415	-0.917737	0.8405	-1.32398	0.0473661	-1.14879	-0.647789	0.700409	-0.280437	0.562301
-21.9	1.06464	-0.24959	-0.547918	-0.964981	0.530548	0.169986	-1.55447	-1.93298	0.791477	5.10586	-0.864053	-0.701961	-0.862109	-1.46714	-2.63128	0.130557	0.510418	-2.73968	-1.85952	0.0943233	-0.621438	0.00551636	-2.77584	-1.18479	0.45297	-0.92809	-1.04424	-1.54166	-2.69437	-1.71224	-0.214408	-2.15547	-1.34989	-1.46127	-1.31933	-0.906264	-0.378231	0.292427	1.61292	-0.222415	-0.0316463	0.366978	-0.220664	0.994679	-0.397946	-1.18761	-0.633704	-0.94029	0.752912
-21.6	2.61887	0.374385	-0.0382264	0.78953	0.0884244	2.59835	-0.343195	-2.75993	2.13296	0.850977	-0.864053	-1.7193	-1.06496	-1.14291	-0.610098	0.00621712	-0.726958	-1.15036	-1.65019	-1.16333	-1.25648	-1.75972	-2.05484	-1.47554	-0.828157	-3.14442	-1.35137	-0.834474	-2.07675	-0.983625	-0.704483	-1.93552	-2.26728	-1.82207	-1.01604	-0.0489871	0.644016	-1.35247	-0.142639	-1.49336	1.48737	1.07726	-0.851131	-1.84726	-0.998621	0.43186	-0.46694	-1.43518	-0.00953019
-21.3	-0.800426	-0.561577	-1.31245	-0.0877252	-1.23795	1.62701	-1.95822	-1.72625	-0.013415	0.547057	-0.864053	-2.73663	-0.65926	-0.00810583	-2.33185	-0.491142	-0.108271	-2.20991	-0.324456	-0.534501	-0.80288	-1.75972	-2.41534	-2.34778	-0.645139	-2.59034	-1.88884	-0.97591	-1.15032	-2.22226	-1.19456	-1.12906	-1.34989	-1.28086	-1.01604	0.685821	-0.173782	0.475194	-0.142639	-0.222415	-0.537984	-0.343302	-1.00875	-0.268405	2.30509	-0.647789	-0.967232	-0.610363	-0.390751
-21	-1.11127	1.31035	0.726309	-0.0877252	1.19373	0.169986	-1.95822	-0.48583	1.73052	-2.18823	-0.864053	0.315374	0.760684	-0.81868	-0.385522	-0.864161	0.510418	-1.68013	-0.184905	2.29521	-0.167834	0.336498	-1.87459	-0.748673	-0.828157	-1.20513	-2.27275	-0.622319	0.0849227	-0.692181	-0.459446	-0.395902	1.40231	1.24478	-1.31933	0.318417	-0.173782	0.292427	0.954586	-0.222415	-0.537984	2.26106	-1.79683	-1.21572	0.052559	2.59116	-1.80105	0.214452	0.562301
-20.7	-1.57754	0.374385	-0.547918	-0.672563	-0.353699	-0.801361	0.464321	1.58153	0.657328	-0.820585	-0.864053	1.12924	0.963534	-0.332335	-1.88269	0.254896	1.12911	-0.696272	-0.743108	-0.848914	-0.0771128	-1.42874	-2.05484	-2.20241	0.45297	-0.99735	-1.04424	-0.622319	-1.92234	-1.42079	0.398186	0.043989	-1.08777	-0.108242	-1.31933	-0.293923	0.644016	1.93733	1.83237	-2.12883	-2.057	1.78754	-0.220664	2.25776	-1.14879	0.971685	-0.300175	-0.280437	-0.390751
-20.4	-1.57754	0.374385	0.471464	-0.380144	1.63586	-0.315687	-1.55447	0.547851	0.523179	0.547057	-0.864053	2.14658	1.36923	-0.980794	-1.20897	0.503576	0.819762	-1.22604	-1.16176	-2.73539	-0.893601	-1.09775	-0.0720999	-2.12972	-0.736648	-2.17478	-0.737108	-1.82453	-1.76794	-2.65943	0.0306295	-1.49563	-2.66046	-1.19066	-1.31933	-1.02873	-0.173782	0.840727	3.80737	-0.540152	-2.94309	1.07726	-0.693515	0.363136	-1.29896	0.971685	-0.967232	0.709342	-1.15319
-20.1	-1.73296	0.686372	0.216618	-0.964981	2.29904	-0.315687	-1.15071	-2.34646	-0.818306	0.850977	-0.442563	-0.905428	0.152137	0.640353	-1.13411	0.503576	0.201073	-1.37741	-1.30131	-1.16333	-1.43793	-2.0907	-1.15359	-0.821359	0.361461	-1.89774	-0.737108	-0.693038	-0.223887	-1.12935	0.0306295	-1.05574	0.09174	-1.19066	-1.01604	-0.171455	0.235117	2.30286	2.05181	0.730794	-2.68992	-0.343302	-0.535898	-0.899948	-1.14879	-2.26727	-1.30076	-2.25999	-0.390751
-19.8	-1.26669	0.686372	-0.293072	-0.380144	-0.574761	-0.315687	-1.95822	-2.34646	-0.818306	-0.972545	-0.864053	0.111907	-0.45641	-0.81868	-1.05925	0.254896	-0.108271	-1.75582	0.233748	1.35198	-0.167834	-1.87004	-0.612847	1.06849	0.361461	0.803421	-0.122851	0.367734	2.09219	-0.765042	0.398186	1.21703	1.40231	-0.108242	-1.31933	-0.906264	0.235117	1.20626	3.36848	0.0953214	-0.284815	3.68162	0.725038	0.994679	0.352896	-1.72744	1.86776	-1.43518	-0.581362
-19.5	-1.88838	0.99836	0.471464	-0.964981	-0.353699	1.14133	-0.343195	-0.899302	-1.3549	0.0911759	-0.864053	1.12924	-1.06496	-3.08829	-1.05925	-0.366802	-0.417614	-1.68013	0.443074	0.0943233	-0.0771128	-1.31841	-0.252348	0.268941	-0.279103	-0.720309	-0.122851	-0.693038	0.0849227	1.49365	0.0306295	-0.322587	-0.170374	-1.01026	-1.31933	-0.416392	-0.582681	0.65796	3.80737	0.413057	-0.284815	0.8405	-1.16637	5.73124	-0.998621	0.43186	1.36747	0.049489	0.37169
-19.2	-1.57754	0.0623972	0.216618	-0.380144	0.530548	1.62701	2.88687	-0.692566	-1.3549	0.0911759	-0.864053	-0.701961	0.760684	-1.30502	0.363064	-0.739821	0.201073	-0.317863	-0.184905	1.35198	0.830096	-0.546119	0.288399	-0.894046	1.09353	0.734161	2.41096	0.579889	0.393733	0.255014	-0.459446	-0.762479	-0.039317	1.06438	-0.712741	-1.1512	0.235117	0.475194	4.02682	-1.8111	-1.67724	1.31402	-0.535898	1.31045	-0.848452	-0.647789	-0.133412	1.69912	-0.200141
-18.9	0.598376	-0.561577	-0.0382264	0.204692	-0.132638	-0.315687	-1.15071	0.341114	-0.013415	-0.0607839	-0.864053	-1.1089	1.36923	-0.00810583	0.812216	0.627916	0.819762	-1.07468	0.443074	1.9808	1.10226	-1.20808	-2.41534	0.850434	1.00202	0.59564	-0.0460691	0.0141436	0.856948	-0.61932	-0.214408	-0.689163	-0.039317	-0.198444	1.71361	-0.538859	-0.173782	0.65796	3.58793	0.730794	-1.80383	1.07726	0.567421	0.363136	-0.247778	-0.107966	0.200117	0.709342	0.943521
-18.6	-0.800426	2.24631	-0.293072	0.204692	2.5201	1.14133	2.88687	-0.899302	-0.684158	0.0911759	-0.864053	-0.0915603	0.760684	1.61304	0.437923	-0.491142	2.36648	-0.0151363	-0.045354	-0.220089	-0.893601	-0.435792	-0.432598	0.850434	1.36806	-0.581788	0.64497	0.226298	1.47457	0.765042	0.888262	-0.835794	0.222797	0.0721614	-1.31933	0.440885	-0.787131	1.75456	3.80737	-0.857889	-0.664568	1.31402	0.252187	0.994679	-0.848452	0.43186	-0.133412	0.544378	0.18108
-18.3	0.287532	-0.561577	-1.05761	0.78953	0.309486	-0.801361	4.5019	-0.48583	-1.3549	-1.42843	-0.864053	-0.701961	-1.67351	1.28881	-1.95755	0.876595	1.74779	-1.45309	-0.603557	0.408736	1.01154	-0.215138	2.27114	2.01342	2.10013	0.941942	-0.353198	0.438452	-0.223887	0.327875	0.0306295	0.923772	1.40231	-0.108242	-1.01604	0.930757	-0.582681	-0.255873	1.17403	1.684	-0.0316463	2.49782	-1.16637	-0.899948	0.052559	-0.107966	-0.800468	1.53416	-2.10625
-18	-0.0233135	0.99836	-1.5673	-0.0877252	2.29904	0.169986	1.27184	-1.93298	-1.0866	0.0911759	-0.864053	-1.51583	0.152137	3.39631	-0.909532	0.627916	1.74779	-0.696272	-0.045354	1.35198	0.19505	-1.09775	0.829146	0.414314	-0.370612	0.180077	-0.353198	-0.410165	2.24659	-0.400736	0.398186	2.17013	0.222797	0.342766	-1.31933	1.17569	0.0306672	1.38903	2.71015	1.04853	1.2342	2.0243	-1.32398	1.31045	0.052559	-0.647789	0.533646	1.20423	1.70596
-17.7	-0.800426	0.0623972	-0.802763	-1.54982	1.63586	1.14133	1.67559	-1.72625	-1.6232	0.0911759	-0.864053	0.315374	-0.253562	2.09939	-2.18213	0.130557	0.510418	-0.923317	0.163972	-0.534501	1.01154	-0.215138	0.108149	0.487001	1.82561	0.6649	-0.583544	1.64066	0.702542	1.71224	0.153148	0.923772	0.747025	0.974179	-0.712741	0.073481	0.0306672	-0.804174	2.27126	2.95495	-0.537984	1.78754	0.725038	-0.584176	0.95357	-2.26727	-0.46694	0.379415	-0.00953019
-17.4	-0.645003	0.374385	1.236	0.204692	-0.353699	1.14133	-0.746951	-0.692566	-1.6232	0.243136	-0.864053	0.518841	-0.862109	1.45093	-1.43354	0.752255	0.201073	2.86077	0.791951	1.66639	1.01154	1.21911	-0.432598	1.94073	2.55768	-0.512527	1.02888	0.933479	1.16576	1.27507	1.86841	0.703826	1.27125	0.883977	1.41032	-0.416392	-1.19603	0.840727	2.92959	-1.17563	-1.17091	1.55078	-1.63922	2.57353	-0.247778	-2.80709	0.867174	1.36919	-0.200141
-17.1	-0.178736	-0.561577	0.216618	0.204692	-2.78538	-0.801361	-1.15071	1.58153	-1.22075	1.00294	-0.864053	-1.51583	-0.253562	-1.46714	-0.0112288	0.503576	2.67583	-0.62059	0.0941967	2.29521	1.55586	0.557152	-0.252348	2.52223	1.82561	3.08902	1.33601	-0.268729	0.239328	-0.255014	1.99093	1.29035	1.1402	1.8762	2.01691	-1.27367	0.0306672	-0.98694	1.17403	-1.49336	-1.67724	3.2081	-0.851131	-0.899948	0.653233	-1.72744	1.53423	2.02905	1.13413
-16.8	0.909221	-1.18555	1.236	1.9592	-0.795823	-0.801361	-1.95822	-1.51951	-1.22075	0.547057	-0.864053	-0.905428	-0.0507124	-0.980794	-1.35868	1.12527	1.43845	-0.696272	-1.23154	-0.848914	1.19298	-1.09775	-1.87459	1.35924	0.819007	-0.0277043	1.41279	-1.18806	0.548137	0.182153	0.765743	-0.102641	-0.039317	-0.0180404	-0.106153	-0.538859	-0.378231	0.65796	1.17403	0.0953214	-0.284815	3.2081	0.0945699	-0.899948	1.70441	-1.18761	1.2007	1.36919	1.51535
-16.5	-0.489581	-0.873564	0.471464	0.497111	2.74117	-0.315687	-1.55447	-0.279094	-0.41586	-0.668625	-0.864053	-2.53316	-1.87636	1.93727	-0.759815	0.130557	1.74779	0.968726	0.163972	-1.47774	-1.16576	0.00551636	-0.252348	0.487001	-0.736648	-0.720309	-0.737108	0.0848618	1.47457	1.93082	0.643224	0.630511	1.79548	0.252565	-0.409448	0.318417	0.235117	0.292427	1.61292	0.413057	-0.664568	2.26106	0.252187	-0.584176	1.70441	4.21064	0.533646	2.52394	0.562301
-16.2	-0.489581	-0.24959	-2.07699	-0.672563	1.85692	1.14133	0.0605633	-2.13972	0.925625	-0.668625	-0.864053	-1.7193	-1.47066	1.45093	-1.65812	0.130557	2.36648	-0.469227	1.07105	-1.16333	-1.98225	-1.75972	-0.973346	-1.33017	0.178443	-1.41291	-0.583544	-0.622319	-0.532697	0.0364306	-0.214408	-1.56895	-0.956716	-1.91228	-1.01604	-0.171455	0.439566	-0.43864	2.27126	1.04853	-1.04432	0.366978	-0.378281	0.994679	-1.14879	0.971685	2.20129	1.53416	-0.200141
-15.9	0.909221	-0.24959	-0.0382264	1.9592	3.18329	-0.801361	0.0605633	0.134379	-1.0866	-1.58039	-0.864053	-0.905428	-0.45641	-1.14291	0.213347	0.752255	-0.108271	-0.1665	-0.394231	-1.16333	-1.3472	-2.31135	1.18964	-0.675986	0.269952	-1.34365	-0.276416	-0.198011	0.0849227	0.255014	-0.581964	-0.909109	-1.08777	-0.739654	-0.106153	-0.538859	-0.173782	0.840727	0.296251	2.63721	-1.29749	2.26106	-0.220664	3.20508	-0.247778	1.51151	0.700409	3.18379	-0.962583
-15.6	-0.489581	1.62233	1.236	0.497111	-0.353699	1.14133	-0.746951	0.961323	-1.6232	-1.88431	-0.864053	-1.1089	1.16638	0.478239	-0.984391	-0.491142	0.510418	0.287591	0.722176	0.0943233	-2.6173	-1.87004	-0.612847	-0.894046	-1.2857	-1.75922	-0.81389	-0.339447	-0.687102	-0.692181	0.643224	-0.029326	-0.825659	-1.82207	-0.409448	-0.171455	1.25736	1.75456	0.735141	0.413057	-0.411399	-0.106542	1.67074	0.0473661	0.052559	4.75046	-0.800468	2.02905	-0.200141
-15.3	-1.26669	0.99836	-1.82214	-1.2574	0.75161	0.655658	-1.55447	-0.692566	-0.550009	0.243136	-0.864053	0.315374	-0.65926	0.640353	0.288206	1.00093	2.05714	-1.37741	-1.30131	-1.79215	-1.89153	-1.64939	-1.69434	-1.03942	-1.10268	-2.72886	-1.12102	-0.763756	0.548137	-1.27507	-1.07204	-2.52205	-2.66046	-2.00248	-0.106153	-0.293923	-0.173782	1.20626	0.296251	0.730794	1.48737	0.366978	3.24691	-0.584176	-1.14879	0.43186	-0.46694	2.19401	-0.962583
-15	1.99718	-0.561577	-0.0382264	0.78953	-0.353699	-0.315687	-2.76574	-2.96666	-0.013415	0.395096	-0.864053	-0.0915603	-2.4849	1.61304	1.33623	0.130557	2.67583	-0.242182	0.582625	-2.10657	-1.07504	-1.98037	-1.33384	-0.167179	1.00202	0.249338	-0.42998	-0.0565745	-0.841507	-0.546458	-1.92967	-1.71558	-0.825659	-2.18288	-0.409448	0.440885	-0.173782	0.10966	1.17403	1.684	1.86712	1.55078	2.93167	-0.268405	0.052559	0.971685	0.200117	0.709342	0.18108
-14.7	-0.489581	0.374385	-0.547918	0.497111	2.74117	0.169986	-1.95822	-2.96666	-0.281712	-0.212744	-0.864053	-2.3297	-1.06496	-0.980794	-0.909532	0.627916	0.819762	-0.393545	0.0941967	3.86728	-0.439996	0.00551636	-2.59559	-1.03942	0.178443	-1.06661	-0.353198	-0.622319	0.856948	-0.692181	-0.949521	0.043989	-0.432488	-0.108242	-1.01604	-0.293923	-0.173782	0.65796	-0.142639	0.730794	-0.411399	3.91838	0.567421	0.678908	1.55424	0.971685	0.200117	1.36919	1.51535
-14.4	0.132109	0.374385	-0.0382264	-0.0877252	3.40435	1.14133	-1.15071	-1.31277	0.523179	0.0911759	-0.864053	-1.31236	-0.45641	-1.95348	-0.310663	1.00093	2.36648	-1.98286	-0.812884	1.9808	-0.893601	-0.435792	-0.612847	-1.11211	0.910516	-0.374006	-0.660326	-0.480883	-0.841507	-2.36799	-0.949521	-1.27569	-0.956716	-2.09268	-0.712741	0.440885	-0.378231	0.10966	2.05181	0.0953214	0.601276	0.366978	2.30121	0.994679	0.202728	1.51151	0.366881	0.709342	0.752912
-14.1	3.39598	2.87028	-0.547918	-0.380144	1.4148	0.169986	-0.746951	-0.0723576	1.99881	-0.972545	-0.864053	0.925775	-0.45641	-1.14291	2.00995	1.49829	2.05714	-0.771953	-0.952435	-0.534501	-1.16576	-1.20808	-0.973346	-1.25748	2.83221	-0.99735	0.261059	-0.763756	-1.45913	-1.12935	-0.704483	-0.835794	-1.87411	-1.91228	0.500436	0.563353	0.848465	0.10966	2.05181	1.04853	-0.284815	1.55078	1.19789	-0.899948	1.55424	0.43186	-0.46694	0.214452	-1.3438
-13.8	4.32851	0.374385	-0.293072	-0.0877252	3.40435	-0.801361	-1.95822	-1.72625	3.3403	-1.42843	-0.864053	-1.51583	0.354986	-0.656565	-1.13411	0.00621712	2.98517	0.0605455	0.443074	-0.220089	-1.3472	-1.42874	-0.0720999	-1.25748	0.0869335	-1.89774	-1.35137	-1.3295	-0.378292	0.400736	-0.336927	-1.78889	-1.21883	-1.91228	-1.31933	-0.661327	-0.582681	-0.255873	-0.800975	-1.8111	0.0949382	-1.76386	1.82836	-0.268405	1.10374	-0.107966	-0.633704	1.36919	0.752912
-13.5	-0.645003	0.0623972	-1.31245	0.497111	-1.01688	0.655658	-2.36198	-1.72625	0.523179	-1.58039	-0.864053	-1.51583	-0.0507124	-0.81868	0.512782	0.130557	-0.417614	-0.1665	-0.464007	1.9808	-1.89153	-1.53906	-0.612847	-2.05703	-1.65174	-1.62069	-0.660326	-1.04663	-0.841507	-0.692181	-0.459446	-2.00884	-3.70891	-1.73187	-0.712741	0.073481	0.235117	-0.0731069	0.0768055	1.04853	-0.664568	2.49782	3.56214	-1.53149	0.352896	0.971685	-0.800468	-0.280437	0.37169
-13.2	-1.11127	1.62233	-1.5673	-0.380144	0.0884244	0.655658	-0.746951	-2.55319	0.120734	-1.88431	-0.864053	-0.0915603	0.152137	0.802468	-1.95755	-0.242462	-0.417614	0.363272	-0.464007	1.66639	-0.712159	-1.20808	-1.69434	-0.821359	2.00863	-1.20513	-1.42815	-0.834474	0.702542	-0.692181	0.398186	-1.27569	-2.00517	-1.55147	-1.01604	-0.171455	-0.582681	-0.43864	-0.581529	-1.8111	-0.284815	-1.29034	0.567421	0.678908	0.503064	0.43186	1.2007	0.379415	-0.200141
-12.9	-1.26669	0.99836	0.981155	-0.380144	0.309486	-0.315687	-1.55447	-1.72625	-0.147564	-0.364704	-0.864053	-1.31236	-0.253562	0.802468	0.138488	0.00621712	0.510418	-0.090818	0.0244215	-0.534501	-1.43793	-1.31841	-1.51409	-0.457926	0.269952	-2.03626	0.184277	-1.3295	-0.841507	-0.765042	-1.19456	-1.05574	-1.34989	-0.649452	-0.712741	1.05323	0.848465	1.02349	1.83237	-0.222415	1.10761	-0.816823	-0.535898	1.31045	0.653233	-0.107966	0.700409	-0.775327	-0.771973
-12.6	-1.73296	3.18227	-0.293072	-0.964981	-0.574761	-0.801361	-1.15071	-1.93298	0.523179	-0.972545	-0.442563	-0.295027	0.354986	0.316124	-1.88269	0.752255	2.67583	-0.317863	0.0244215	0.0943233	-1.61937	-1.31841	-1.15359	-0.38524	0.178443	-0.0969646	-0.42998	0.367734	1.16576	0.0364306	-0.091889	-1.42232	-0.694602	-1.19066	-0.106153	0.318417	-0.582681	-0.0731069	0.735141	0.730794	1.36078	-0.106542	0.882655	1.94199	-0.0976097	-0.647789	1.03394	-0.115474	1.32474
-12.3	-1.57754	0.374385	0.471464	-1.2574	-0.795823	-0.801361	-1.15071	-0.48583	0.389031	-0.364704	-0.864053	-0.498494	-0.862109	-1.14291	-1.13411	0.254896	2.67583	0.287591	0.931502	-1.79215	-0.621438	-1.09775	-0.252348	1.43193	1.91712	-0.374006	-0.353198	0.297016	1.32016	0.0364306	-0.581964	-0.175957	-0.432488	-0.649452	-1.01604	-1.02873	0.235117	1.93733	-0.581529	-0.222415	2.24687	2.49782	2.14359	0.678908	0.653233	2.05134	0.867174	0.049489	-0.771973
-12	-0.645003	0.686372	-0.293072	-0.0877252	3.62541	0.169986	-0.746951	-0.692566	0.120734	-0.0607839	-0.442563	0.111907	0.354986	0.478239	2.45911	-0.118123	1.74779	-0.771953	-0.464007	-2.42098	-1.43793	-0.435792	-1.87459	-0.239866	0.544479	-1.82848	0.107495	-0.0565745	0.856948	0.400736	0.520705	-0.175957	0.09174	-0.829856	-1.01604	-1.39614	-1.40048	-0.43864	0.0768055	-1.17563	1.2342	2.0243	1.67074	-0.899948	-0.0976097	1.51151	-0.133412	2.52394	0.18108
-11.7	-1.88838	0.686372	0.981155	-0.672563	0.0884244	2.11268	1.67559	-0.279094	-1.22075	-0.972545	-0.864053	-0.701961	0.354986	-0.170221	2.00995	-0.366802	0.201073	0.665999	0.303523	-1.79215	-0.893601	-0.987428	0.288399	0.559687	0.269952	-1.41291	-0.353198	0.367734	1.47457	-0.61932	1.25582	-0.689163	-0.825659	-0.559251	0.197141	-0.416392	-0.99158	1.20626	1.39348	-1.49336	1.36078	1.55078	2.30121	2.88931	-0.247778	-0.107966	-0.46694	-0.115474	-0.581362
-11.4	-0.800426	-1.18555	1.236	-0.672563	-0.353699	0.169986	-0.343195	-1.72625	-2.15979	0.0911759	-0.864053	-0.295027	-0.253562	-0.980794	-1.58326	0.876595	1.12911	-0.696272	0.861727	0.0943233	-0.984321	0.115844	0.648897	-1.03942	-1.01118	-2.24404	-0.967455	-0.0565745	1.32016	-0.182153	0.520705	0.410565	-2.00517	-1.37107	-0.712741	0.808289	2.07516	0.840727	-0.581529	0.413057	1.10761	2.49782	0.409804	-1.84726	-0.998621	0.43186	-1.134	-1.60014	-0.390751
-11.1	-1.57754	-0.561577	0.981155	-0.672563	-0.132638	-0.315687	0.0605633	-1.51951	-1.22075	-1.73235	-0.864053	-1.7193	-0.65926	1.1267	-1.28383	-0.242462	1.43845	-0.544908	-0.184905	-3.0498	-1.89153	-1.42874	0.288399	-1.18479	-1.83476	-2.3133	-1.35137	-0.905192	-0.0694824	-1.20221	1.01078	-1.05574	-2.13623	-1.46127	-0.712741	1.05323	0.235117	-1.16971	0.296251	1.04853	1.74054	1.07726	0.725038	-2.16303	0.95357	2.05134	0.700409	0.049489	0.752912
-10.8	-1.11127	0.374385	0.471464	0.204692	-2.34325	-0.315687	0.464321	-0.0723576	-2.15979	1.45882	-0.864053	-1.7193	1.57208	0.640353	-0.46038	-0.242462	2.05714	0.0605455	0.931502	-1.47774	-0.258554	-1.75972	-1.33384	-0.167179	0.727497	-1.06661	-0.276416	0.0141436	0.856948	-0.182153	-0.214408	0.630511	-0.825659	-0.559251	-1.31933	1.42063	1.87071	0.292427	1.17403	-0.540152	1.74054	1.07726	1.04027	-0.268405	0.95357	-0.647789	-0.633704	1.36919	2.46841
-10.5	-1.42212	1.62233	0.726309	-0.672563	0.530548	0.655658	0.868079	1.3748	-2.15979	-1.88431	-0.864053	-0.498494	0.760684	1.28881	1.33623	1.37395	1.43845	0.0605455	0.791951	0.723149	-0.530717	-0.435792	0.829146	-0.457926	1.45957	-2.03626	-0.276416	0.0848618	1.16576	0.473598	-1.68463	-1.20237	-0.956716	-0.288645	-1.01604	-0.661327	0.235117	-0.804174	0.296251	-0.540152	3.00638	-1.5271	1.82836	-1.84726	0.653233	0.971685	-0.633704	0.049489	1.51535
-10.2	-0.800426	0.686372	1.49085	-0.672563	0.75161	3.08402	1.67559	1.3748	0.791477	0.850977	-0.864053	-0.295027	-0.0507124	0.640353	-0.684956	-0.491142	1.43845	2.25532	0.931502	0.723149	-0.167834	-0.325465	0.288399	2.44954	1.64259	-0.0969646	-0.506762	-0.551601	0.239328	0.692181	-0.581964	-1.27569	-0.694602	-0.469049	-1.01604	0.318417	0.0306672	-0.804174	0.296251	1.684	1.74054	1.31402	0.252187	-0.268405	0.052559	0.43186	0.366881	0.214452	0.562301
-9.9	-1.26669	1.31035	0.471464	-0.672563	-1.45901	0.655658	-1.55447	0.961323	-0.41586	1.30686	-0.864053	-0.905428	0.557835	-1.46714	-0.909532	-0.739821	-0.108271	0.514636	-0.394231	1.03756	-0.80288	-1.64939	-2.41534	-0.0218061	-0.370612	-0.651048	-0.506762	0.297016	-0.223887	0.910764	0.153148	0.557196	-1.08777	-1.37107	0.197141	0.808289	-0.173782	0.10966	-1.45931	-0.857889	-0.15823	-1.76386	1.98597	0.678908	-0.247778	-1.72744	0.533646	-0.445401	-1.15319
-9.6	-1.26669	0.0623972	-0.802763	-0.0877252	0.309486	0.169986	0.0605633	-1.72625	-1.0866	-0.668625	-0.442563	2.14658	-0.65926	1.45093	0.737357	1.12527	0.819762	-0.469227	-0.743108	2.60963	-1.61937	-0.656447	-1.33384	0.632374	0.45297	-1.20513	-0.199634	0.367734	-1.15032	-0.327875	1.25582	0.263935	-0.563545	-1.55147	-0.712741	0.440885	0.644016	-0.0731069	-0.362084	-1.49336	0.601276	0.130218	1.98597	-0.584176	0.95357	-1.18761	-1.46753	0.214452	-1.53441
-9.3	-1.26669	0.99836	0.216618	-0.0877252	3.40435	1.14133	-0.343195	-0.279094	-1.0866	-0.364704	-0.864053	1.53618	-0.65926	-0.656565	-0.160946	0.00621712	1.12911	0.817362	0.722176	1.35198	-0.258554	-1.75972	2.63164	1.28655	1.36806	-0.581788	-0.506762	0.0141436	-0.378292	0.0364306	0.765743	1.36366	0.09174	0.342766	-0.712741	1.29816	0.235117	-3.18014	-0.362084	-0.222415	2.12029	-0.106542	0.725038	-1.84726	0.95357	0.43186	-0.633704	-0.115474	-0.00953019
-9	-1.26669	-0.24959	1.236	-0.964981	0.309486	-0.315687	0.464321	1.3748	-1.48905	-0.364704	-0.0210738	1.12924	0.760684	-2.1156	-1.13411	-1.11284	-0.108271	0.136227	-0.184905	0.0943233	-1.07504	-1.20808	-0.612847	-1.11211	0.45297	-1.20513	-0.506762	0.226298	0.393733	0.182153	1.37834	-0.542533	-0.432488	-0.829856	-0.712741	0.195949	-0.99158	1.20626	0.954586	-1.17563	1.48737	1.55078	2.93167	-0.584176	0.95357	-1.72744	0.700409	0.049489	0.562301
-8.7	-0.178736	0.374385	-0.802763	0.497111	-0.574761	1.14133	0.464321	-2.13972	-1.6232	2.82646	-0.864053	-1.92276	-0.0507124	-0.332335	-0.0112288	-0.864161	-0.108271	-0.998999	0.791951	0.723149	-1.98225	-1.87004	-2.05484	-2.05703	0.635988	-1.62069	-0.737108	2.34784	0.0849227	-1.42079	-0.949521	-1.05574	-1.08777	-1.46127	-1.31933	0.195949	0.235117	-0.0731069	0.0768055	-0.222415	-0.0316463	1.31402	1.51312	0.363136	-1.14879	0.43186	0.366881	-0.280437	0.18108
-8.4	1.53091	-0.24959	-0.293072	1.08195	-0.353699	4.05537	-0.343195	-2.13972	0.657328	-0.668625	-0.864053	-1.31236	-0.253562	-2.60194	-0.46038	1.12527	0.510418	-0.242182	0.791951	-1.47774	-0.439996	-0.104811	0.468648	0.123567	2.19164	-0.235486	-0.276416	-0.410165	1.32016	-1.20221	0.643224	-0.029326	-0.039317	-0.829856	-1.31933	-0.538859	0.0306672	-0.0731069	2.27126	0.0953214	-0.0316463	1.31402	0.725038	-0.899948	0.653233	-0.647789	0.0333527	0.214452	2.08718
-8.1	0.753799	0.0623972	-0.0382264	1.37437	-0.795823	2.59835	4.09814	-1.51951	0.791477	-0.364704	-0.864053	-0.295027	0.152137	-0.49445	0.737357	1.00093	2.05714	-0.090818	0.0941967	-0.220089	0.557933	-0.215138	-1.69434	1.50461	0.635988	0.0415562	0.721752	0.367734	-0.223887	0.837903	0.765743	0.263935	2.05759	1.69579	-1.01604	-0.171455	0.0306672	-0.0731069	0.0768055	1.36627	1.48737	2.26106	-0.535898	1.31045	-0.397946	0.971685	-1.134	-0.280437	-0.771973
-7.8	0.442954	1.62233	-2.33183	-0.380144	1.4148	2.11268	0.868079	-0.0723576	-0.147564	1.00294	-0.0210738	-1.51583	-0.65926	0.154009	-0.310663	0.254896	-0.417614	0.438954	1.69903	2.60963	1.19298	-1.64939	0.648897	1.14118	0.635988	0.318598	-0.276416	1.21635	0.548137	0.765042	2.35849	1.73024	-0.301431	-0.0180404	-1.31933	-0.538859	-1.40048	0.840727	0.515696	1.36627	0.854445	0.130218	0.252187	-1.21572	-0.0976097	0.971685	-0.633704	-2.58992	-0.962583
-7.5	-1.42212	-1.18555	-0.293072	-1.2574	-0.574761	2.11268	0.0605633	-1.10604	-0.952455	-0.212744	-0.864053	0.722308	-2.0792	-1.30502	0.0636298	-0.864161	-0.108271	0.741681	0.722176	1.35198	-0.0771128	-0.656447	0.468648	-0.748673	-0.187594	1.21898	0.337841	0.367734	1.01135	1.49365	1.50086	0.630511	0.484911	0.0721614	-0.712741	-0.416392	0.644016	2.12009	0.954586	-0.540152	-0.284815	-1.5271	-1.79683	0.678908	1.25391	-1.18761	-1.134	-1.43518	0.562301
-7.2	-0.334158	1.62233	1.74569	-0.0877252	2.96223	1.62701	0.868079	-0.0723576	1.46222	2.37058	-0.864053	-0.0915603	-1.06496	-2.1156	-0.834673	-1.11284	-0.108271	-0.242182	0.722176	0.408736	-0.258554	-1.64939	-1.51409	0.0508807	1.00202	-0.512527	0.491406	-0.622319	-0.532697	0.109292	0.398186	-0.249272	0.222797	-0.739654	-0.409448	0.318417	0.0306672	2.48563	0.954586	2.31948	-0.284815	0.130218	-0.693515	0.0473661	0.352896	-1.72744	0.867174	-0.280437	-0.962583
-6.9	1.37549	0.686372	-0.0382264	-0.964981	-0.132638	0.169986	2.48311	-0.48583	0.791477	1.76274	-0.0210738	0.315374	0.557835	-1.62925	1.11165	-1.23718	-0.417614	-0.847635	-0.603557	1.35198	-0.439996	-0.435792	-0.252348	-0.239866	-0.55363	-0.85883	-0.737108	0.226298	0.239328	-1.12935	-0.949521	0.33725	-0.432488	-1.10046	0.197141	-0.783796	-0.378231	-1.35247	2.27126	2.95495	-0.284815	-1.76386	-1.32398	-0.584176	-1.29896	-1.18761	0.366881	-1.10525	0.752912
-6.6	0.442954	0.686372	0.216618	0.204692	1.4148	-0.801361	0.868079	-0.0723576	-0.013415	1.9147	-0.442563	0.518841	-0.65926	-0.49445	-1.95755	-1.11284	-1.34565	0.287591	1.55948	3.23845	1.19298	1.5501	-1.15359	1.86805	2.28315	0.6649	2.41096	1.21635	1.62897	2.44085	2.11345	2.17013	3.23711	1.51539	-1.01604	-1.5186	1.05291	0.840727	3.80737	0.730794	-0.284815	0.130218	-1.00875	-0.584176	-1.29896	-1.18761	1.53423	-1.76511	0.37169
-6.3	-0.645003	-0.873564	0.471464	-0.672563	0.75161	-0.801361	-1.15071	0.547851	1.59637	-0.0607839	0.400414	0.925775	-0.0507124	0.478239	0.0636298	-1.85888	-0.726958	-0.771953	1.35015	0.408736	1.19298	1.10879	-1.15359	0.995808	1.27655	0.734161	-0.122851	0.792043	1.16576	0.692181	1.1333	0.483881	0.747025	1.8762	-1.31933	0.318417	-2.01383	1.02349	2.4907	-0.222415	1.2342	2.73458	-1.00875	3.20508	-0.0976097	-0.647789	1.36747	-0.115474	-0.00953019
-6	-1.42212	-1.18555	0.216618	-0.0877252	0.972672	-0.315687	0.0605633	-0.48583	-0.41586	1.9147	-0.0210738	-0.0915603	0.354986	1.28881	-0.0860875	-0.242462	-0.108271	-1.37741	-1.09199	1.35198	0.376492	-0.435792	0.829146	-0.748673	1.18504	0.803421	0.491406	0.579889	0.393733	-0.473598	-0.091889	-0.102641	-0.694602	-0.829856	-1.31933	0.073481	-1.60493	-1.35247	0.0768055	-1.49336	1.48737	-2.00063	0.0945699	2.25776	-1.29896	-1.72744	2.70158	0.379415	0.37169
-5.7	1.22007	-0.873564	-0.293072	1.66678	0.75161	-0.315687	-0.343195	-1.10604	1.59637	1.61078	-0.864053	0.722308	0.760684	-0.170221	-0.684956	-1.36152	0.510418	-0.1665	-1.30131	0.723149	1.37442	0.777806	-0.793096	0.196254	-0.0960845	1.56529	0.0307128	-0.905192	-0.995912	-0.910764	0.398186	-1.12906	-0.694602	0.793775	0.197141	1.29816	2.48406	0.10966	0.0768055	-0.540152	1.48737	1.31402	-0.220664	0.0473661	-0.998621	1.51151	-0.133412	1.03927	-0.390751
-5.4	0.132109	-0.873564	0.981155	-0.672563	0.0884244	-0.801361	-1.15071	2.61521	-0.41586	0.395096	-0.442563	-0.498494	0.152137	0.640353	0.0636298	0.254896	-1.0363	-0.696272	0.163972	1.35198	0.648654	1.21911	-1.51409	0.995808	0.269952	1.56529	-0.506762	0.721325	0.239328	0.182153	-0.581964	-0.909109	-0.432488	-0.378847	-0.106153	0.440885	1.05291	0.475194	-1.67875	-1.17563	1.9937	1.31402	-1.16637	0.678908	-1.29896	0.971685	-0.967232	0.049489	-2.48747
-5.1	0.442954	2.24631	-1.31245	-0.0877252	-0.132638	-0.315687	0.464321	0.341114	-1.48905	-0.0607839	0.400414	-0.295027	0.557835	-0.980794	1.71052	0.752255	-1.34565	-1.60445	-1.65019	-1.16333	-0.439996	-0.435792	-1.87459	1.50461	-0.187594	0.110817	-0.122851	-0.0565745	0.856948	-0.400736	-0.214408	-0.322587	0.353854	-0.198444	0.500436	0.685821	0.848465	-1.90077	0.296251	-0.540152	-0.791152	-0.580063	0.252187	-1.21572	1.70441	-0.107966	0.533646	-0.775327	1.51535
-4.8	0.287532	0.374385	0.216618	-0.0877252	-1.23795	0.169986	-0.746951	-0.0723576	-0.952455	-0.212744	-0.442563	0.518841	0.152137	-0.49445	0.288206	0.503576	-0.108271	0.514636	-0.25468	-1.16333	0.104329	-0.656447	-1.51409	0.995808	0.635988	0.457119	-0.42998	1.21635	-1.76794	-0.109292	-1.19456	-1.49563	-0.825659	-1.37107	-0.712741	0.440885	-1.40048	-0.0731069	-1.67875	-0.540152	-0.284815	1.07726	1.82836	0.363136	-0.247778	-1.72744	-0.800468	-1.27022	0.18108
-4.5	1.22007	1.62233	-0.293072	-0.672563	0.75161	-0.801361	1.27184	0.754587	-1.6232	0.0911759	0.400414	-2.53316	-0.862109	0.154009	0.138488	-0.491142	0.510418	1.4985	0.791951	0.408736	0.648654	-0.546119	1.55014	0.850434	0.269952	-0.789569	1.41279	1.0042	-0.841507	1.12935	0.0306295	0.997088	0.615968	0.342766	-1.31933	1.42063	0.235117	-0.98694	-0.362084	0.730794	-0.15823	1.31402	-0.535898	-0.584176	-0.548115	-0.107966	-0.46694	1.36919	-0.581362
-4.2	-0.645003	-0.24959	0.981155	1.08195	0.530548	-0.315687	-1.15071	0.961323	0.523179	-0.212744	-0.864053	0.315374	-0.0507124	0.802468	-0.759815	-0.864161	0.201073	0.211909	-0.394231	0.408736	-1.25648	0.226171	-0.432598	-0.38524	1.18504	-0.235486	1.56636	-0.622319	0.239328	-0.182153	0.275667	-0.615848	1.00914	-0.378847	0.197141	1.29816	-0.787131	-0.255873	0.0768055	1.04853	-0.791152	-0.816823	-1.4816	-0.584176	-0.848452	-0.107966	-0.800468	1.69912	1.13413
-3.9	-0.0233135	0.374385	-1.82214	-1.54982	-1.23795	0.655658	-0.746951	-0.279094	1.05977	-0.0607839	-0.864053	-0.295027	-0.862109	-0.332335	-1.95755	-0.366802	-0.417614	-1.07468	-0.045354	0.723149	-0.80288	0.336498	1.18964	0.0508807	0.269952	0.941942	0.107495	-0.480883	-0.995912	-0.837903	-0.704483	-1.349	-0.170374	-1.01026	2.6235	1.42063	0.848465	0.10966	-1.45931	0.413057	-0.917737	0.603739	-0.378281	-0.899948	0.803402	-0.647789	0.200117	0.709342	-1.15319
-3.6	-1.26669	0.0623972	-1.82214	-0.964981	-0.574761	2.59835	0.868079	-1.10604	-0.952455	-0.972545	2.50786	-0.0915603	1.57208	1.61304	-0.834673	-0.864161	-1.34565	-0.090818	-0.184905	-0.848914	-0.530717	1.5501	0.468648	1.50461	0.727497	-0.374006	1.87348	-0.834474	1.01135	0.327875	-0.704483	0.777142	1.1402	0.703573	-0.106153	-0.0489871	-1.40048	0.840727	0.0768055	1.36627	-1.42407	-0.106542	-0.220664	-0.268405	1.10374	0.971685	-0.300175	0.214452	-0.00953019
-3.3	-1.26669	-1.49754	-0.293072	0.204692	0.530548	-0.801361	0.464321	1.3748	-0.013415	-1.12451	2.08637	-0.905428	-1.87636	-0.81868	-0.834673	0.130557	0.201073	1.04441	1.00128	-1.47774	1.91875	1.43977	1.0094	0.777748	1.00202	1.0112	-1.27458	1.42851	0.856948	1.05649	2.48101	0.923772	1.53337	2.3272	-0.712741	0.195949	-0.378231	0.475194	0.296251	1.36627	-0.664568	-1.05358	-1.4816	0.363136	-0.698284	-0.107966	0.200117	-0.610363	0.562301
-3	0.287532	1.62233	0.726309	1.9592	1.4148	-0.801361	0.0605633	1.16806	-0.281712	-0.668625	0.821904	0.722308	0.557835	0.964583	0.812216	-0.9885	0.510418	0.211909	1.35015	0.408736	0.830096	1.43977	0.288399	-0.312553	-0.462121	-0.235486	-0.967455	0.438452	1.78338	1.71224	0.153148	0.483881	0.222797	0.793775	0.197141	-0.0489871	0.0306672	1.57179	1.61292	-0.540152	-0.537984	-1.29034	0.0945699	-1.84726	-1.14879	0.43186	-0.967232	0.709342	1.13413
-2.7	-0.334158	-0.561577	1.49085	0.497111	-1.23795	-0.801361	0.0605633	-0.899302	0.657328	-1.42843	-0.0210738	1.33271	-0.45641	0.964583	0.213347	-1.11284	0.819762	0.363272	1.69903	1.66639	0.830096	1.21911	-0.612847	-0.0944928	-1.2857	0.52638	-0.353198	1.85281	-0.0694824	1.27507	-0.214408	-0.029326	1.27125	1.9664	-0.409448	0.563353	-0.378231	1.02349	-0.581529	-0.540152	0.348107	0.366978	-0.0630466	0.678908	0.803402	-0.647789	0.200117	1.03927	-0.390751
-2.4	0.753799	-1.18555	0.726309	1.08195	1.63586	-0.315687	0.464321	-0.899302	2.40126	-0.820585	-0.442563	1.94311	-0.0507124	-0.656565	0.213347	-1.23718	1.12911	-1.52877	-0.045354	0.0943233	0.0136082	-1.20808	0.468648	-0.821359	-1.65174	0.249338	-0.890673	0.50917	0.239328	-1.34793	-0.827002	-1.12906	-1.21883	-0.288645	-0.106153	-1.27367	-0.378231	-0.804174	0.296251	0.730794	0.72786	-0.580063	1.51312	-1.21572	2.00475	0.971685	1.70099	0.544378	-1.15319
-2.1	2.46345	0.374385	0.726309	1.37437	1.19373	2.59835	1.67559	-0.48583	0.523179	-1.27647	0.821904	-0.0915603	-0.862109	1.77516	-1.05925	-0.739821	2.05714	-0.544908	-1.51064	0.0943233	-0.984321	-0.877101	0.288399	-1.83897	-2.2923	-0.581788	-1.04424	-1.25878	-2.07675	-1.85796	-0.581964	-0.322587	-2.13623	-1.46127	2.3202	-0.416392	-0.582681	-0.0731069	1.39348	-0.540152	-1.67724	-0.816823	-0.378281	0.678908	0.202728	-0.107966	0.700409	-0.775327	0.943521
-1.8	0.132109	-0.561577	-0.802763	0.204692	-0.795823	0.655658	-1.95822	-1.31277	0.791477	-0.0607839	-0.442563	0.722308	0.963534	-0.332335	1.93509	1.87131	-1.34565	-1.07468	-1.23154	-1.79215	-1.07504	-0.877101	-1.15359	-1.6936	0.178443	-1.82848	-0.583544	-1.61237	-0.687102	-1.63938	-0.091889	-0.982424	-0.956716	-0.739654	0.197141	0.073481	0.644016	0.475194	1.39348	-1.17563	-0.411399	-0.106542	-0.0630466	-0.268405	1.40408	0.971685	-0.800468	-0.445401	-0.00953019
-1.5	-1.11127	0.686372	0.216618	-0.672563	-1.45901	-0.315687	-0.746951	-0.0723576	-0.41586	0.547057	-0.864053	0.722308	1.77493	-1.62925	0.58764	0.503576	-1.65499	1.12009	1.00128	1.03756	-1.71009	-0.546119	0.648897	-0.0218061	-0.00457534	-1.06661	0.184277	-0.339447	1.32016	0.61932	0.153148	0.850457	0.353854	0.162363	-0.712741	-0.906264	-0.378231	1.20626	0.735141	1.684	0.854445	-0.106542	-1.32398	1.31045	-0.397946	-0.647789	-0.133412	-1.43518	0.37169
-1.2	-0.334158	0.0623972	-0.293072	-0.380144	-1.45901	0.169986	0.0605633	-0.0723576	-0.684158	-0.364704	-0.864053	0.518841	-1.67351	-1.62925	1.18651	1.37395	0.201073	0.438954	-0.533782	-0.220089	-0.893601	-0.987428	-0.612847	-1.03942	0.0869335	-1.34365	-1.58171	-1.47094	0.0849227	-0.400736	2.60353	1.21703	-1.34989	-0.920058	0.197141	-1.1512	1.25736	-0.621407	-1.67875	1.04853	0.981029	-0.816823	1.82836	-0.899948	0.052559	-1.72744	1.03394	-0.775327	-0.00953019
-0.9	0.909221	0.374385	-0.802763	-0.964981	-0.353699	0.169986	0.868079	0.134379	0.254882	2.06666	-0.864053	-0.498494	1.16638	-0.81868	-0.0112288	1.99565	-0.726958	0.136227	0.791951	-0.534501	-0.80288	-1.64939	0.108149	-1.18479	-1.46872	-1.06661	1.56636	-0.622319	-0.378292	0.765042	0.0306295	1.80356	0.878081	0.252565	-0.106153	-2.13094	0.235117	-1.90077	0.735141	-1.49336	-0.411399	0.366978	-0.0630466	1.31045	-0.247778	1.51151	0.366881	0.049489	-1.3438
-0.6	-0.800426	-0.561577	-0.293072	-1.2574	0.530548	-0.801361	-1.15071	0.341114	-0.281712	0.850977	-0.864053	-1.51583	-0.45641	-0.332335	0.512782	0.503576	0.819762	0.893044	0.6524	-0.220089	1.2837	0.557152	0.648897	0.414314	0.269952	-0.92809	-0.122851	0.792043	0.702542	0.910764	-1.31708	-0.029326	0.484911	-0.198444	0.197141	-0.906264	0.0306672	0.65796	0.0768055	0.0953214	0.348107	0.366978	0.567421	0.0473661	-0.247778	-0.107966	-1.134	-2.09503	0.18108
-0.3	-0.645003	-0.24959	1.74569	-0.672563	0.0884244	-0.315687	1.67559	-0.899302	-0.281712	-0.212744	0.821904	-0.701961	-0.862109	-0.00810583	-1.43354	0.379236	1.12911	1.72554	0.791951	-0.848914	0.467212	-0.546119	1.0094	0.850434	1.36806	1.21898	0.64497	-0.339447	0.0849227	0.182153	0.398186	1.36366	0.615968	0.432968	-1.01604	-1.02873	-0.378231	1.02349	0.296251	0.0953214	-0.15823	1.55078	1.19789	0.0473661	-0.0976097	0.43186	-1.134	0.379415	1.13413
0	2.1526	0.0623972	3.78445	0.78953	-3.00644	1.14133	-1.15071	-3.1734	-2.42809	23.0372	-0.864053	-2.73663	-0.45641	-2.27771	4.03114	8.46131	-1.34565	1.64986	1.83858	0.0943233	4.00533	1.10879	1.73039	3.53984	0.269952	2.11937	1.41279	3.47933	3.48183	5.06385	1.1333	4.80948	2.31971	3.86063	-1.31933	-1.39614	0.848465	2.48563	6.00182	0.730794	-0.917737	6.04923	15.541	-0.268405	7.11048	0.43186	1.86776	-2.58992	-0.200141
0.3	5.72732	-0.561577	5.05868	3.71371	0.972672	3.08402	-0.343195	-3.79361	-1.22075	-0.820585	-0.864053	-3.5505	-2.4849	-3.08829	1.41108	2.86603	-2.27368	0.741681	1.07105	3.55286	4.73109	2.76369	0.468648	2.95835	-0.00457534	2.88123	3.33234	2.41856	1.32016	3.38804	0.643224	0.923772	3.36816	3.13902	-0.106153	-2.98822	-0.378231	-2.08354	10.8296	0.730794	-1.93041	3.2081	8.7635	-1.84726	6.50981	-2.80709	3.70217	-1.27022	-1.15319
0.6	3.08513	-1.80953	3.27476	0.497111	3.40435	4.54105	0.464321	-1.10604	-1.0866	-0.820585	-0.864053	-2.53316	-0.862109	-1.79137	-1.13411	1.99565	-2.27368	0.287591	-0.184905	2.29521	2.82595	2.65337	-1.87459	-0.239866	0.0869335	1.49603	-0.199634	-0.480883	-0.995912	0.546458	-0.704483	1.43698	1.53337	2.59781	1.71361	-2.13094	-0.173782	-2.63184	6.8796	2.63721	-2.31017	2.26106	7.8178	-1.84726	5.45863	-3.34691	1.86776	-2.25999	-1.53441
0.9	0.287532	-0.873564	0.981155	0.497111	0.0884244	3.08402	-0.746951	-2.55319	-2.56224	-1.58039	-0.864053	-1.51583	-1.26781	-2.27771	0.887075	0.627916	-1.65499	-0.1665	-0.464007	-0.848914	0.19505	-0.766773	-0.973346	-0.530613	-0.00457534	-0.99735	-0.583544	-0.551601	-1.45913	-0.983625	0.153148	-0.029326	1.27125	0.162363	6.56632	-1.5186	0.0306672	-3.18014	5.56293	2.63721	-2.56333	4.3919	2.45882	-2.4788	0.352896	-1.72744	0.867174	-1.10525	1.89657
1.2	-0.178736	0.686372	2.76507	-0.0877252	3.40435	0.169986	-0.343195	-1.10604	-1.6232	-1.27647	-0.864053	-2.3297	-2.0792	-3.2504	-0.834673	0.503576	0.201073	1.42282	-0.743108	0.408736	1.82803	0.557152	2.27114	0.123567	0.544479	0.110817	-0.660326	0.0141436	0.548137	0.546458	0.888262	1.80356	1.40231	1.60559	3.53338	-2.62082	-0.99158	-3.18014	6.00182	1.36627	-1.80383	0.8405	3.24691	-1.84726	2.15492	-2.80709	0.366881	-1.93007	-0.390751
1.5	1.06464	0.99836	2.51023	1.08195	0.75161	1.14133	0.0605633	-2.55319	-1.48905	-1.27647	-0.864053	-3.5505	-1.47066	-2.60194	-1.20897	-0.366802	2.67583	-0.1665	0.163972	1.03756	1.55586	1.9914	-0.0720999	0.196254	-0.370612	1.56529	0.64497	0.721325	1.01135	0.765042	1.1333	0.33725	1.1402	0.613372	2.01691	-1.27367	-1.40048	-2.99737	4.24626	0.0953214	-0.917737	2.0243	2.77406	-0.584176	1.10374	-1.18761	-1.134	-3.90963	0.37169
1.8	0.598376	1.31035	2.76507	-0.0877252	-1.23795	1.14133	-0.343195	-1.31277	-2.15979	-0.516665	-0.864053	-3.75397	-2.28205	-3.57463	-0.834673	0.130557	2.36648	-1.52877	-1.23154	-0.534501	3.0074	0.99846	-1.87459	1.43193	2.37466	1.98085	0.0307128	0.50917	1.16576	-2.65943	-0.949521	-0.029326	1.53337	1.78599	5.35314	-0.416392	-1.40048	-0.98694	1.61292	1.36627	-2.18358	1.07726	4.03499	-1.53149	0.052559	-3.34691	0.0333527	-3.41474	-0.00953019
2.1	0.287532	2.5583	1.236	-0.380144	-0.574761	1.62701	0.464321	-0.899302	-2.42809	-0.364704	-0.442563	-3.34703	-1.47066	-2.60194	0.138488	1.00093	1.43845	0.590317	1.07105	-1.16333	1.37442	-0.546119	0.108149	0.487001	0.727497	0.180077	1.25923	2.13569	-0.223887	0.0364306	2.23597	3.04991	3.49922	3.95083	4.13997	-1.76354	-1.40048	-2.81461	2.4907	-0.222415	-0.791152	4.86543	3.08929	-0.899948	0.503064	-2.26727	1.36747	-1.27022	-0.390751
2.4	-0.800426	-0.873564	1.74569	-0.672563	-0.353699	3.08402	0.868079	-3.58687	-0.818306	-0.0607839	-0.442563	-2.9401	-1.47066	-3.08829	-0.684956	0.130557	0.819762	-0.544908	1.28038	4.18169	1.46514	2.54304	0.108149	1.86805	1.91712	2.39641	2.02705	2.27712	1.78338	2.36799	2.48101	2.31676	5.72719	5.03326	2.6235	-0.661327	-0.582681	-2.08354	1.61292	-0.222415	-2.8165	0.603739	2.93167	-0.268405	1.70441	0.971685	-0.633704	0.544378	0.37169
2.7	-1.42212	0.374385	2.25538	-0.964981	0.530548	1.14133	-0.343195	-0.899302	-0.952455	0.243136	-0.864053	-3.5505	-1.87636	-2.76406	-1.35868	-0.242462	0.510418	0.817362	0.0244215	1.03756	1.46514	1.43977	1.18964	3.61253	1.7341	1.42677	1.41279	2.91359	1.16576	1.05649	0.398186	1.36366	5.46507	1.78599	3.53338	0.195949	-0.582681	-1.53524	-0.362084	-0.540152	-1.80383	0.366978	4.50784	-1.21572	-0.247778	-1.18761	-0.46694	-0.445401	0.18108
3	-0.955848	0.99836	1.74569	0.204692	1.4148	2.59835	1.27184	-2.96666	-0.013415	0.547057	-0.864053	-2.9401	-1.26781	-1.30502	-0.310663	-1.85888	4.22255	1.12009	1.69903	1.35198	3.37028	3.31533	1.73039	1.50461	2.28315	2.9505	1.7967	2.63071	3.32743	2.51371	2.23597	2.53671	9.52784	6.65689	1.71361	-0.171455	0.644016	0.10966	-1.23986	2.00174	-1.42407	0.603739	1.19789	-0.584176	-0.848452	-1.72744	0.700409	-0.610363	0.943521
3.3	-1.57754	0.374385	1.236	-1.2574	0.309486	-0.801361	-1.55447	-4.20708	1.59637	1.9147	-0.442563	-3.34703	-1.87636	-1.46714	0.737357	-1.6102	4.84123	1.19577	0.861727	1.9808	4.09605	2.65337	1.73039	3.83059	2.19164	3.50458	0.184277	1.85281	2.09219	1.12935	3.0936	2.61002	5.0719	7.01769	2.6235	2.03297	-0.173782	-1.71801	-2.11764	0.730794	-1.42407	0.8405	1.35551	-1.53149	0.653233	-1.18761	2.53482	-1.76511	-0.581362
3.6	-2.19923	-0.561577	2.00054	-1.84224	-1.01688	-0.801361	-1.15071	-1.51951	-0.41586	-0.0607839	-0.864053	-1.92276	-1.26781	-2.1156	-0.759815	-1.98322	5.45992	2.40668	1.62926	1.35198	2.46307	2.98435	0.288399	2.81297	1.82561	1.28824	0.261059	4.04508	2.5554	4.11665	2.11345	4.80948	6.38247	4.58225	0.197141	-0.0489871	-0.173782	-3.72844	-1.02042	0.0953214	-1.55066	3.2081	1.04027	-0.584176	-0.848452	-0.107966	0.200117	0.379415	0.37169
3.9	0.753799	2.5583	2.25538	-0.964981	-0.132638	0.169986	-0.746951	-1.31277	5.35253	0.395096	-0.864053	-1.92276	-0.253562	0.316124	-1.35868	-1.11284	10.7188	1.57418	-0.952435	1.35198	1.91875	0.115844	-0.793096	3.03103	1.55108	3.08902	1.25923	1.07492	1.32016	2.51371	0.398186	1.80356	5.33402	2.86841	3.83667	0.440885	-0.582681	-0.98694	-2.99542	-0.222415	-2.057	2.73458	3.71976	-1.53149	1.10374	-0.107966	-2.13458	-1.76511	-0.581362
4.2	-0.0233135	-0.561577	1.74569	-0.672563	1.4148	1.62701	-1.55447	-0.0723576	4.27934	-0.364704	-0.864053	-2.73663	-0.45641	-1.14291	-0.684956	-1.23718	7.62533	0.741681	2.25724	1.03756	3.73316	3.42566	1.55014	3.32178	1.18504	5.44387	2.64131	2.56	2.5554	2.1494	2.72604	2.24345	7.95515	6.02547	1.71361	0.073481	0.235117	0.292427	-1.8982	1.04853	-1.80383	-0.343302	2.61644	-0.268405	0.052559	-0.647789	-0.633704	-2.09503	-0.581362
4.5	-0.489581	-0.24959	-0.0382264	-0.672563	-0.132638	0.655658	-0.343195	-0.899302	0.120734	0.0911759	-0.864053	-0.905428	0.963534	-2.60194	0.138488	-0.739821	2.98517	1.12009	2.60611	1.03756	2.55379	2.32239	0.468648	3.03103	2.19164	2.18863	2.94843	4.5401	3.32743	-1.05649	1.37834	2.90328	2.84394	4.13124	-0.712741	-0.0489871	-0.173782	0.475194	-3.87321	-0.540152	-1.55066	-0.343302	2.30121	-0.584176	-0.0976097	-2.80709	-0.967232	-2.09503	-0.771973
4.8	-1.42212	-0.24959	1.49085	-1.54982	0.75161	1.62701	1.27184	-1.51951	1.32807	-0.0607839	-0.864053	-0.701961	-1.06496	-1.62925	-0.0860875	-1.73454	5.45992	1.04441	1.28038	0.408736	2.82595	1.66042	0.648897	1.72267	1.00202	2.60419	2.64131	1.71138	4.40826	1.7851	0.888262	0.557196	6.38247	4.94305	-0.712741	1.66557	0.235117	-1.71801	-3.65376	0.0953214	-1.17091	-1.5271	4.82308	0.0473661	1.25391	-2.26727	-0.300175	-1.60014	-0.00953019
5.1	-0.0233135	-0.24959	2.00054	-1.2574	-1.90113	0.655658	-1.55447	-2.34646	5.62082	-0.820585	-0.864053	-2.73663	-1.47066	0.154009	-0.610098	-1.6102	5.45992	2.55804	1.62926	-0.534501	3.64244	2.21206	-0.612847	2.15879	-0.645139	2.39641	0.952098	2.9843	0.856948	0.61932	1.50086	1.80356	4.41662	7.01769	0.197141	0.808289	0.0306672	-2.26631	-2.99542	0.413057	-0.917737	1.55078	5.29593	-0.584176	0.503064	-0.107966	0.200117	-1.76511	-0.390751
5.4	0.753799	0.686372	1.49085	0.497111	1.85692	0.655658	0.464321	-1.31277	-0.41586	-0.0607839	-0.864053	-1.7193	-1.26781	0.154009	-2.18213	-1.6102	5.15058	2.40668	1.00128	1.66639	1.01154	0.226171	-0.0720999	0.487001	2.83221	1.08046	0.107495	0.367734	3.17302	1.42079	1.25582	1.43698	4.54768	5.03326	0.803729	2.27791	-0.173782	-2.63184	-4.09265	2.00174	1.36078	-2.23739	2.77406	-1.21572	0.352896	-0.107966	0.200117	-1.43518	1.13413
5.7	-0.645003	0.0623972	2.25538	-0.0877252	-0.574761	-0.801361	-1.55447	-0.692566	2.93785	0.699016	-0.864053	-1.92276	-0.65926	1.77516	0.737357	-1.23718	7.31599	-0.393545	0.6524	1.03756	0.648654	-0.435792	-2.23509	1.86805	0.178443	0.872682	0.184277	2.84287	0.702542	0.765042	-0.827002	-0.395902	3.36816	4.40184	-0.712741	1.29816	-1.19603	-2.26631	-4.53154	1.36627	-0.537984	0.603739	1.67074	-0.268405	0.202728	-0.647789	1.03394	-1.76511	-0.00953019
6	0.287532	-0.24959	0.471464	-0.380144	-0.132638	1.14133	-0.746951	-0.899302	2.40126	-1.58039	-0.0210738	-1.51583	-0.45641	-0.170221	-0.909532	-1.23718	4.22255	0.438954	0.861727	1.35198	1.55586	1.5501	-1.15359	-0.239866	1.00202	1.63455	1.64314	1.14563	0.0849227	-1.20221	-0.949521	0.483881	2.58182	3.68023	-0.712741	1.5431	-0.582681	-1.53524	-4.09265	2.63721	-0.411399	-0.816823	2.61644	-0.584176	0.052559	0.971685	0.0333527	-3.41474	-0.200141
6.3	-0.800426	0.0623972	1.236	0.204692	-0.795823	-0.801361	-1.15071	-2.75993	-0.147564	-0.212744	-0.864053	0.111907	-0.0507124	0.154009	-0.385522	-0.864161	4.84123	-0.0151363	-0.673333	1.03756	1.37442	0.226171	-1.15359	-0.457926	-0.0960845	1.84233	1.02888	1.14563	-0.378292	-0.983625	1.74589	0.19062	4.28556	3.77043	-0.712741	2.52284	-0.582681	-2.44907	-3.87321	1.36627	-1.67724	-1.5271	1.51312	-0.268405	-0.397946	-1.18761	-0.133412	-0.94029	0.37169
6.6	-0.800426	0.686372	0.471464	-0.672563	-1.23795	0.169986	-1.55447	-0.279094	0.254882	0.0911759	-0.442563	-1.7193	-0.253562	-0.00810583	0.58764	-1.36152	4.22255	-0.847635	0.0244215	2.92404	0.467212	1.77075	-0.793096	1.86805	0.635988	-0.443267	-0.276416	1.49922	0.0849227	-0.692181	-0.091889	0.923772	4.02345	3.77043	-1.01604	2.03297	-0.99158	-1.71801	-4.53154	1.04853	-0.917737	1.55078	0.252187	-1.53149	-2.0498	-1.72744	-0.133412	-1.76511	-0.390751
6.9	-1.57754	-0.24959	-1.31245	-1.2574	1.19373	-0.801361	-1.95822	-1.31277	-0.013415	1.61078	-0.442563	-1.51583	0.557835	0.802468	-1.5084	-1.11284	4.84123	1.42282	0.6524	1.9808	0.648654	-0.435792	-2.05484	-0.6033	1.82561	0.180077	0.491406	2.84287	-1.15032	-0.109292	-0.214408	-1.05574	2.18865	1.9664	-0.712741	4.11493	-0.582681	-1.71801	-4.31209	1.36627	-0.537984	0.8405	1.35551	0.994679	-0.0976097	-1.72744	0.0333527	-0.445401	0.37169
7.2	-1.42212	0.0623972	-0.293072	-1.84224	1.19373	4.54105	3.69438	-3.58687	-1.48905	-0.212744	-0.864053	-0.905428	-0.65926	-0.49445	-2.03241	0.130557	4.22255	0.438954	1.41993	2.60963	1.7373	1.5501	1.73039	2.37685	-0.00457534	1.56529	1.18244	3.19646	1.32016	0.61932	2.72604	0.263935	4.02345	4.49205	-0.712741	5.82948	0.439566	-0.804174	-3.65376	1.36627	-0.0316463	0.366978	-0.0630466	-0.899948	-0.247778	-1.72744	-0.300175	-1.10525	1.51535
7.5	-0.955848	0.374385	-0.0382264	-1.54982	0.75161	4.05537	1.27184	-1.31277	-0.684158	0.243136	-0.864053	1.94311	1.97778	-0.81868	-0.909532	0.254896	2.67583	-0.242182	0.791951	4.4961	0.830096	2.65337	1.36989	2.44954	2.10013	2.60419	1.71992	2.13569	0.393733	3.4609	4.56383	2.24345	7.56198	5.12346	0.197141	5.46208	-0.99158	-0.804174	-3.65376	2.31948	2.12029	-1.29034	0.0945699	1.31045	-0.698284	-0.647789	-0.133412	0.214452	-0.771973
7.8	-0.334158	1.31035	-0.0382264	0.497111	-1.90113	0.655658	0.0605633	-0.692566	0.389031	-0.364704	-0.864053	0.925775	-0.0507124	-0.49445	-1.35868	0.379236	2.67583	-0.090818	0.443074	0.0943233	1.82803	0.667479	-0.432598	2.01342	0.727497	3.08902	1.25923	2.20641	-1.45913	0.473598	1.99093	0.777142	3.89239	5.12346	-1.01604	4.11493	-0.582681	-1.35247	-2.77598	2.00174	0.348107	-0.343302	2.14359	-1.21572	-1.44913	-3.88674	-0.46694	-0.280437	0.37169
8.1	-1.11127	0.686372	1.236	-0.964981	0.75161	-0.801361	-0.746951	0.547851	2.40126	0.547057	-0.864053	-0.905428	-1.06496	-0.170221	-0.834673	-0.491142	4.22255	0.363272	-0.394231	1.35198	0.0136082	0.99846	-0.0720999	2.59491	2.64919	1.63455	-0.81389	1.99425	-0.687102	-0.983625	-1.31708	0.19062	2.97499	1.8762	-1.01604	4.11493	-0.378231	-1.53524	-2.11764	1.36627	0.72786	-1.29034	1.04027	0.0473661	0.352896	-0.107966	-1.30076	1.69912	-0.200141
8.4	-0.800426	-0.561577	0.471464	-0.0877252	2.07798	1.14133	-0.343195	0.754587	0.791477	-2.03627	-0.442563	0.518841	-1.06496	-0.332335	2.30939	-0.615481	5.15058	1.19577	-0.25468	0.723149	2.19091	2.65337	-1.69434	3.39447	0.910516	1.77307	0.337841	1.92353	-0.687102	1.20221	1.74589	0.923772	3.23711	2.41741	-1.31933	4.6048	-1.60493	-0.98694	-1.67875	1.684	-0.284815	-0.343302	0.567421	0.0473661	1.40408	-0.647789	2.36805	-1.27022	1.32474
8.7	-1.88838	1.31035	0.471464	-1.2574	-1.01688	1.62701	1.67559	1.78827	0.254882	-1.58039	-0.864053	-0.701961	0.760684	0.154009	-0.160946	-1.48586	3.60386	0.741681	0.861727	-0.848914	1.01154	1.10879	0.288399	0.196254	1.82561	0.6649	0.0307128	0.650607	2.401	0.983625	2.11345	1.21703	4.02345	1.8762	-1.01604	3.86999	-0.99158	-1.53524	-2.11764	1.36627	-1.80383	-2.00063	-0.693515	-2.16303	-1.5993	-2.80709	0.700409	-1.43518	0.752912
9	-1.57754	0.686372	0.726309	-0.964981	-0.353699	1.62701	2.48311	2.20174	0.791477	-1.12451	-0.442563	0.518841	1.16638	1.28881	0.58764	-0.615481	3.60386	1.42282	2.32701	2.60963	-0.0771128	1.10879	-0.612847	0.0508807	1.64259	-0.581788	1.02888	0.226298	1.32016	1.71224	-0.704483	2.0235	4.41662	1.8762	0.803729	4.9722	-0.787131	1.02349	-2.55653	2.63721	0.348107	-0.580063	2.45882	-2.16303	-1.44913	-0.647789	0.0333527	-1.27022	2.84963
9.3	-0.800426	0.686372	-0.0382264	-0.380144	0.0884244	0.655658	-1.55447	-0.692566	-0.684158	-1.42843	-0.864053	0.518841	-0.65926	1.61304	0.961933	-0.615481	1.74779	0.968726	-0.184905	-2.42098	1.91875	1.88108	-0.432598	1.79536	1.36806	1.42677	1.25923	2.13569	2.401	1.56651	-0.336927	1.36366	2.18865	5.21366	0.197141	4.6048	-0.378231	-0.255873	-2.55653	1.684	1.48737	-0.816823	0.567421	-0.584176	-0.848452	-1.72744	-1.134	-0.610363	1.70596
9.6	-1.88838	0.0623972	0.471464	-0.380144	-0.132638	2.11268	1.67559	-0.48583	-0.684158	-1.58039	-0.864053	-0.498494	0.557835	0.154009	-1.88269	-0.118123	2.05714	-0.696272	1.14083	0.0943233	1.64658	2.87402	-0.0720999	1.64999	0.635988	0.180077	1.33601	1.92353	-0.378292	2.00368	-0.091889	1.36366	4.02345	1.8762	-1.01604	2.52284	-0.582681	0.840727	-0.142639	3.27268	0.854445	-0.580063	0.882655	1.94199	-0.548115	2.05134	0.200117	-1.76511	-0.00953019
9.9	-1.26669	-0.24959	-0.0382264	-1.2574	0.0884244	1.62701	1.27184	4.68257	-1.0866	-0.668625	-0.864053	0.518841	-0.862109	-0.332335	-1.05925	-0.242462	4.84123	0.741681	1.2106	1.9808	2.64451	1.43977	-0.432598	-1.03942	-0.00457534	1.77307	1.41279	-0.198011	0.393733	1.12935	-0.214408	2.31676	1.53337	2.59781	-0.106153	2.76778	1.05291	-0.43864	0.0768055	0.730794	0.0949382	1.07726	0.0945699	-2.4788	0.653233	-2.26727	0.366881	-1.10525	2.84963
10.2	-1.26669	-0.24959	1.236	-0.0877252	-0.795823	-0.315687	-0.746951	2.61521	-0.952455	-1.58039	-0.864053	-1.7193	-0.862109	0.478239	-0.759815	-0.242462	5.76927	0.893044	2.11768	2.29521	1.82803	1.43977	0.468648	1.35924	1.18504	0.180077	1.18244	1.71138	1.93778	2.29513	2.35849	1.95019	3.76133	1.9664	-1.31933	2.52284	-0.787131	0.292427	0.0768055	4.54363	-0.791152	-0.816823	2.30121	-0.584176	-1.5993	-0.647789	-0.46694	-1.27022	-1.15319
10.5	-1.57754	0.374385	0.216618	-0.964981	-1.45901	2.11268	-0.746951	2.61521	1.73052	-2.34019	-0.864053	0.925775	-0.45641	0.802468	-1.65812	-0.366802	4.22255	0.287591	1.14083	0.0943233	-0.349275	-0.104811	-0.252348	1.06849	0.178443	1.42677	0.184277	0.297016	1.78338	2.1494	0.520705	0.630511	2.31971	0.52317	-1.31933	2.40037	-0.787131	0.475194	1.17403	5.1791	-1.17091	1.78754	1.51312	-1.53149	-0.247778	-1.72744	0.0333527	-1.76511	0.752912
10.8	-2.0438	-1.18555	0.471464	-0.672563	-0.574761	-0.801361	1.27184	4.88931	1.05977	-1.73235	-0.864053	-1.31236	-0.45641	0.154009	-0.684956	-0.615481	1.74779	0.968726	0.6524	1.66639	0.285771	0.667479	0.829146	0.559687	-1.10268	-0.85883	-0.737108	0.0848618	1.01135	1.20221	-0.459446	0.483881	-0.432488	0.342766	-1.31933	2.52284	-0.582681	-0.43864	-1.67875	3.27268	-1.42407	2.26106	3.24691	0.0473661	-1.14879	-3.34691	0.366881	-0.775327	1.89657
11.1	-0.955848	0.374385	0.216618	-0.380144	-1.23795	1.62701	-1.55447	3.85563	0.254882	-2.18823	-0.0210738	0.111907	-0.0507124	0.478239	0.0636298	-0.118123	1.12911	0.438954	0.0244215	1.35198	-0.80288	0.557152	1.18964	0.123567	1.09353	-1.62069	-0.660326	1.35779	1.93778	1.63938	1.99093	-0.029326	1.1402	0.162363	2.6235	2.27791	-0.582681	-1.16971	-2.33709	1.36627	-1.17091	1.55078	0.252187	1.31045	-0.848452	-3.34691	1.2007	-2.25999	0.752912
11.4	-0.334158	0.686372	2.00054	0.204692	-1.68007	-0.315687	-2.36198	5.30278	-0.818306	-1.27647	0.400414	-0.905428	-0.45641	-1.30502	-2.63128	0.627916	1.12911	-0.0151363	1.41993	2.29521	0.648654	0.00551636	0.288399	0.123567	-0.0960845	-0.581788	-0.42998	1.28707	1.78338	2.44085	2.11345	1.21703	2.84394	1.9664	-0.106153	1.66557	-0.787131	-1.16971	1.61292	3.90816	-0.917737	-0.106542	0.0945699	-0.268405	-1.44913	-1.72744	-0.133412	-2.42496	-0.00953019
11.7	-1.42212	0.0623972	2.25538	-0.672563	0.530548	-0.315687	-1.55447	2.40848	-1.3549	-1.42843	-0.0210738	-1.1089	0.963534	-0.980794	-0.759815	-0.242462	2.05714	0.817362	-0.11513	-0.848914	-0.80288	-0.325465	-1.69434	0.0508807	0.544479	-1.20513	-1.35137	0.297016	-0.378292	-0.255014	-0.704483	0.33725	-0.563545	-0.649452	-0.106153	2.64531	-2.01383	0.10966	0.954586	2.31948	3.6393	0.130218	2.61644	0.363136	0.803402	-0.107966	-0.133412	-0.280437	1.51535
12	-0.489581	0.374385	1.236	-1.2574	-1.68007	-0.801361	-2.36198	3.23542	0.523179	-1.27647	-0.442563	-1.31236	0.557835	-0.170221	0.138488	-1.36152	0.819762	1.19577	0.443074	-0.848914	-0.80288	-1.20808	0.288399	0.123567	0.269952	0.387859	0.0307128	0.0848618	-0.0694824	0.109292	1.62337	0.630511	0.09174	-0.559251	0.197141	1.9105	-0.582681	0.10966	-1.02042	1.36627	-1.04432	-1.05358	-0.0630466	-1.53149	-0.848452	-1.18761	1.03394	-0.445401	0.18108
12.3	-2.19923	-0.873564	3.78445	-0.964981	-0.353699	-0.801361	-2.76574	0.754587	-0.013415	-1.42843	-0.864053	-0.498494	0.354986	0.964583	-0.535239	1.00093	0.510418	0.741681	0.373299	0.723149	1.64658	1.5501	1.0094	0.705061	-0.645139	1.63455	0.414623	0.0141436	-0.378292	1.93082	0.153148	-0.835794	2.45076	1.9664	-0.712741	2.40037	0.235117	-0.804174	-1.23986	0.0953214	-0.15823	0.8405	1.35551	-1.21572	-0.247778	1.51151	-0.967232	0.544378	-0.962583
12.6	-1.26669	-0.24959	2.51023	-0.380144	-0.132638	-0.801361	-2.76574	2.40848	1.99881	0.0911759	-0.0210738	-0.701961	0.152137	1.28881	2.53396	0.130557	0.201073	1.95259	-0.324456	0.0943233	-0.258554	-0.325465	-0.793096	0.341627	1.00202	-0.235486	-0.0460691	-0.905192	2.24659	2.58657	0.275667	0.263935	2.18865	1.60559	1.41032	1.42063	0.0306672	-0.804174	-0.362084	0.413057	0.474691	-1.05358	2.14359	-0.268405	-0.397946	-2.26727	-0.300175	-0.115474	0.562301
12.9	-1.73296	0.374385	3.52961	-1.54982	0.309486	0.169986	-1.15071	3.64889	4.14519	-0.668625	-0.442563	-0.701961	0.963534	0.154009	-0.46038	0.130557	0.819762	0.741681	1.14083	1.66639	1.01154	0.446825	-1.87459	-0.0218061	2.00863	-0.581788	0.337841	1.0042	0.239328	-0.837903	-0.091889	0.33725	0.09174	1.24478	-0.409448	2.40037	0.235117	2.48563	-0.581529	0.730794	0.981029	0.8405	2.61644	-1.21572	-1.29896	-1.18761	0.0333527	0.544378	1.32474
13.2	-0.955848	-0.561577	2.25538	-1.54982	0.0884244	-0.315687	-1.95822	4.68257	0.657328	-1.12451	-0.864053	0.315374	0.354986	-0.81868	-1.65812	-0.366802	0.510418	1.72554	-1.58041	-0.848914	-0.439996	1.32944	-0.432598	0.559687	0.0869335	0.734161	0.568188	1.64066	0.0849227	0.910764	0.643224	0.483881	1.27125	0.883977	-1.01604	3.13518	0.235117	-0.804174	0.954586	4.22589	3.00638	0.603739	3.24691	-1.84726	0.052559	0.43186	0.867174	-0.610363	1.51535
13.5	-1.42212	-1.49754	0.216618	-1.84224	2.07798	0.655658	-2.36198	1.995	0.523179	1.00294	0.400414	-1.1089	-0.45641	0.154009	-1.35868	-1.23718	2.05714	0.438954	0.163972	0.723149	-0.0771128	-1.42874	0.288399	1.5773	0.819007	0.180077	-0.122851	2.34784	0.239328	-0.400736	1.37834	0.777142	-0.039317	0.703573	-1.01604	2.03297	0.439566	-1.71801	0.954586	3.27268	1.2342	0.366978	2.93167	-1.84726	0.95357	1.51151	-0.967232	1.03927	0.37169
13.8	-1.26669	0.374385	1.74569	-0.672563	0.530548	-0.315687	-1.15071	1.16806	-0.013415	-0.516665	2.08637	-0.295027	-1.06496	-0.332335	-0.984391	-0.491142	2.36648	0.514636	0.791951	2.92404	-0.80288	0.115844	-2.59559	1.43193	0.0869335	1.49603	1.18244	0.933479	0.239328	-0.837903	-1.19456	0.630511	-0.563545	-0.198444	-1.01604	1.5431	-0.787131	0.840727	0.0768055	1.36627	-0.917737	1.78754	3.71976	-1.53149	0.052559	-0.647789	-1.30076	0.379415	-1.3438
14.1	1.06464	-0.873564	0.981155	0.78953	1.63586	-0.801361	-1.95822	0.961323	0.523179	-1.12451	-0.864053	-0.295027	-1.26781	-0.81868	-0.909532	0.503576	0.819762	-0.0151363	0.582625	3.23845	-1.07504	-0.435792	1.55014	0.268941	-0.187594	-0.374006	-0.0460691	0.792043	0.856948	0.400736	1.86841	1.58361	1.92654	0.793775	-0.106153	0.685821	0.235117	-1.35247	1.17403	1.36627	1.2342	0.8405	0.882655	-1.21572	0.803402	-0.107966	0.366881	-1.43518	2.84963
14.4	0.909221	-0.24959	-0.293072	0.78953	0.0884244	-0.801361	0.0605633	1.3748	-0.281712	-1.27647	-0.864053	0.111907	1.16638	-1.14291	1.86024	0.254896	-0.726958	0.287591	-0.603557	2.60963	-1.16576	-0.435792	-0.0720999	2.44954	-0.279103	-0.374006	0.64497	0.721325	-0.532697	0.473598	0.398186	1.51029	2.84394	0.0721614	0.197141	0.808289	0.235117	1.38903	1.61292	-0.540152	-1.55066	3.91838	0.725038	-1.21572	0.803402	-0.107966	-0.46694	-0.280437	0.752912
14.7	1.68633	1.93432	0.216618	-0.964981	-0.574761	0.169986	1.27184	0.754587	-0.147564	0.0911759	-0.442563	2.14658	0.557835	0.316124	-1.05925	-1.36152	-0.726958	0.438954	-1.16176	-0.220089	0.739375	1.66042	-1.15359	1.21387	0.178443	-0.374006	1.18244	1.7821	0.856948	0.255014	1.1333	1.0704	1.40231	0.793775	-1.31933	-0.0489871	0.235117	0.840727	1.39348	2.31948	-1.29749	3.44486	-0.378281	1.31045	0.352896	0.971685	2.20129	0.544378	1.70596
15	-0.334158	-1.49754	0.216618	-1.54982	2.29904	1.14133	2.07935	-0.899302	-0.41586	0.850977	-0.864053	0.111907	0.354986	1.28881	-2.33185	-0.9885	-0.108271	-0.242182	0.233748	2.92404	1.10226	3.75664	0.288399	2.6676	2.00863	1.77307	2.25739	0.50917	2.86421	0.837903	0.765743	0.997088	2.45076	1.42519	-0.106153	0.685821	-0.378231	0.475194	0.515696	0.730794	-1.17091	1.55078	-2.11207	1.94199	-1.29896	-1.72744	0.200117	0.544378	-0.200141
15.3	-2.0438	0.374385	0.981155	-1.2574	-0.574761	2.11268	0.868079	-0.899302	-0.550009	-1.27647	-0.864053	-0.0915603	-0.45641	2.09939	-0.535239	-0.864161	0.510418	-0.696272	-0.812884	3.23845	1.91875	0.888133	0.468648	2.52223	0.0869335	1.70381	0.0307128	-0.834474	-0.0694824	-1.49365	-0.091889	0.630511	3.63028	2.86841	-1.31933	2.15544	-1.60493	2.85116	-1.23986	0.0953214	2.12029	0.366978	1.04027	-2.79457	-0.698284	2.05134	-1.46753	1.03927	-0.200141
15.6	-1.57754	0.0623972	-0.293072	-0.0877252	-1.01688	-0.315687	-0.343195	0.341114	0.657328	-1.58039	-0.442563	-0.0915603	-0.45641	1.45093	0.213347	-0.864161	0.201073	-1.15036	0.303523	1.9808	3.0074	-0.215138	-0.793096	0.196254	1.45957	0.941942	1.25923	-0.127293	-0.532697	0.473598	0.0306295	-0.395902	1.79548	2.86841	-1.01604	3.50259	-1.40048	-0.255873	-1.8982	-1.17563	3.89247	-1.29034	0.725038	-0.268405	0.202728	1.51151	0.0333527	1.20423	-0.00953019
15.9	-0.800426	-0.24959	1.74569	0.78953	0.530548	-0.315687	-1.55447	-0.48583	0.791477	-0.668625	-0.442563	-0.295027	0.354986	1.93727	-1.43354	-0.9885	0.510418	-1.8315	-0.743108	0.0943233	0.467212	-0.435792	-0.973346	1.43193	-0.0960845	1.84233	0.721752	0.933479	0.0849227	-0.765042	0.275667	-1.349	1.00914	-0.469049	-0.106153	2.40037	-0.378231	-0.255873	-1.02042	-0.540152	1.9937	0.603739	0.0945699	1.31045	-0.998621	2.05134	0.0333527	1.69912	-0.390751
16.2	-0.645003	0.686372	1.49085	-0.380144	0.309486	0.169986	-0.343195	-0.899302	2.13296	-1.42843	-0.864053	1.33271	-1.06496	3.23419	1.63566	-0.9885	-0.108271	-0.847635	-0.464007	0.408736	-0.621438	-0.877101	-0.973346	0.414314	1.00202	-0.0277043	1.02888	-0.97591	-0.687102	-1.56651	-1.80715	0.117304	0.484911	-0.108242	-1.01604	2.03297	-1.60493	0.292427	0.954586	1.684	-0.15823	1.07726	-0.378281	2.25776	-1.29896	0.971685	-0.800468	1.03927	-0.390751
16.5	-0.955848	0.374385	-0.0382264	-0.380144	-1.68007	1.62701	0.868079	1.16806	1.19392	0.0911759	-0.864053	-1.1089	-0.45641	2.58573	-1.35868	0.130557	-1.0363	-0.998999	-1.02221	2.29521	-0.712159	-1.09775	-0.252348	1.79536	0.544479	1.3575	-1.04424	1.56994	-0.223887	2.22226	1.25582	-0.102641	0.353854	-0.920058	-0.712741	0.685821	-0.378231	1.57179	2.71015	-0.222415	-0.791152	1.07726	-0.535898	0.0473661	-1.44913	-0.107966	1.53423	0.214452	0.562301
16.8	-1.73296	-1.18555	-0.293072	0.204692	-1.68007	0.169986	1.27184	1.3748	-0.684158	-0.364704	-0.864053	0.518841	-0.45641	1.45093	0.512782	-0.118123	-0.108271	0.211909	-0.603557	0.723149	-0.167834	-1.31841	-1.15359	2.08611	-0.279103	-0.99735	-0.583544	1.71138	0.393733	-1.05649	0.888262	-0.102641	0.222797	1.8762	-1.31933	2.52284	0.644016	0.65796	3.14904	1.04853	1.36078	3.68162	-0.378281	0.363136	0.202728	2.05134	-0.633704	-1.10525	0.562301
17.1	-1.26669	0.374385	-0.547918	-0.964981	-3.2275	1.14133	1.67559	-0.279094	1.05977	-0.820585	-0.864053	0.925775	-1.47066	-0.00810583	-0.0860875	-1.36152	-0.417614	-0.090818	-0.394231	2.29521	-1.3472	-1.31841	-1.15359	-0.312553	1.09353	-0.99735	-1.35137	0.579889	-1.15032	-0.910764	-0.459446	-1.56895	0.747025	-0.0180404	-1.31933	0.440885	2.48406	1.57179	0.735141	-0.857889	2.75321	2.0243	0.409804	1.94199	-1.14879	-0.107966	0.0333527	-1.43518	-0.581362
17.4	0.442954	0.374385	-0.802763	0.78953	0.309486	1.14133	1.27184	3.02869	1.73052	-1.12451	-0.0210738	-0.701961	-0.253562	-0.49445	-2.10727	0.752255	1.43845	1.57418	0.373299	-0.220089	-1.07504	1.43977	-1.15359	-2.27509	-0.736648	-2.03626	-0.276416	-0.834474	1.47457	0.255014	-0.704483	0.043989	-0.170374	0.432968	-0.106153	0.930757	-2.01383	-0.98694	-0.800975	0.0953214	-1.04432	-0.816823	0.0945699	0.0473661	-0.0976097	2.05134	0.533646	-1.27022	-0.200141
17.7	0.287532	0.99836	-1.05761	1.08195	-1.01688	0.169986	-1.15071	-0.0723576	0.925625	-1.12451	-0.0210738	1.12924	0.354986	-0.656565	-0.0112288	0.130557	-0.726958	-0.242182	0.163972	-0.848914	-0.984321	-0.877101	0.108149	-1.62091	0.727497	0.52638	-0.122851	-1.18806	-0.378292	-0.837903	-1.4396	-0.982424	-1.48094	-1.01026	-1.01604	1.66557	-0.173782	-0.255873	-1.45931	-1.17563	-1.67724	0.130218	0.0945699	-0.899948	-0.698284	-2.26727	0.700409	-1.93007	-0.390751
18	-0.645003	-0.561577	0.471464	-0.0877252	-0.795823	0.655658	0.0605633	2.20174	1.99881	-0.972545	-0.442563	-1.1089	0.963534	-0.656565	-2.18213	0.876595	-1.96433	0.590317	1.14083	-1.79215	-0.0771128	0.667479	-0.793096	-2.34778	-2.10928	-0.85883	0.184277	-0.693038	1.01135	-0.400736	0.398186	0.263935	0.747025	-0.288645	0.803729	1.29816	-0.378231	-0.621407	-0.142639	-0.857889	-1.93041	0.603739	-1.16637	-0.899948	-2.50031	-0.107966	0.533646	-0.445401	1.70596
18.3	-0.645003	-0.24959	1.236	-0.0877252	-2.78538	-0.315687	-0.746951	1.16806	2.66956	-0.212744	-0.864053	-0.701961	0.557835	-0.170221	-2.48156	-0.864161	-0.108271	-0.696272	-0.324456	-1.47774	0.285771	0.777806	0.108149	-0.675986	-1.10268	-1.06661	-1.04424	-0.0565745	-0.223887	0.983625	-0.214408	-1.64226	0.484911	0.0721614	-1.31933	3.01271	-0.378231	2.30286	-0.142639	0.0953214	1.61395	2.0243	-0.378281	0.0473661	-0.848452	0.43186	0.700409	0.214452	-0.581362
18.6	-1.42212	0.0623972	2.00054	-0.0877252	-1.23795	0.169986	-1.15071	-0.48583	1.73052	0.243136	-0.864053	-0.905428	-0.45641	-0.332335	-1.58326	0.379236	-0.417614	0.514636	1.14083	3.55286	-0.621438	-1.09775	-0.973346	-0.312553	0.0869335	0.457119	-0.737108	0.721325	-1.15032	0.546458	-1.07204	-0.542533	0.222797	0.342766	-0.106153	2.64531	0.0306672	0.292427	1.61292	-0.857889	4.01905	2.73458	1.04027	-0.268405	0.95357	2.05134	-0.633704	-0.280437	0.943521
18.9	-1.73296	0.686372	-0.0382264	-0.672563	0.75161	-0.801361	-0.343195	-0.0723576	-0.013415	0.395096	-0.442563	-1.7193	-0.65926	1.77516	0.662499	0.503576	-1.0363	-1.52877	0.443074	-0.220089	0.19505	-0.546119	0.288399	-0.894046	1.00202	0.59564	-0.122851	0.297016	-0.995912	0.473598	-0.091889	-0.982424	0.09174	-1.28086	-0.106153	2.03297	1.46181	1.75456	3.80737	1.04853	1.86712	-0.106542	3.08929	-0.584176	-0.0976097	1.51151	-0.46694	0.379415	0.18108
19.2	-1.26669	-0.24959	0.471464	-0.964981	0.309486	1.14133	0.464321	0.961323	0.389031	-0.364704	-0.864053	-1.1089	-0.65926	0.802468	0.437923	-0.242462	-0.726958	0.136227	0.582625	0.723149	0.0136082	-1.42874	0.468648	-0.821359	-0.828157	-1.41291	0.337841	-0.198011	0.702542	0.473598	0.0306295	-0.689163	-0.170374	-1.55147	0.500436	0.318417	0.439566	0.292427	2.71015	0.0953214	1.36078	2.0243	2.14359	-0.268405	-1.44913	-1.72744	-0.633704	0.544378	-0.00953019
19.5	-0.955848	0.686372	0.981155	-0.380144	0.309486	-0.801361	-0.343195	-1.31277	-0.952455	1.61078	-0.864053	-0.0915603	-1.67351	1.45093	0.961933	0.876595	0.819762	-0.847635	-0.324456	0.723149	-1.16576	-1.53906	-1.51409	0.123567	-1.10268	-1.55143	0.261059	-0.693038	-0.687102	0.546458	-0.459446	0.19062	-1.48094	0.162363	0.197141	0.930757	-0.173782	-0.255873	2.27126	0.413057	-0.664568	-2.00063	0.725038	-0.268405	-1.29896	-0.647789	-0.46694	-1.10525	-0.200141
19.8	1.53091	-0.24959	1.49085	0.204692	1.19373	1.14133	-1.55447	-0.0723576	1.05977	1.00294	-0.864053	-1.51583	-1.06496	1.77516	-0.385522	-0.118123	0.510418	0.665999	-0.25468	2.60963	-0.530717	-0.435792	-0.432598	0.0508807	0.269952	-0.443267	0.414623	-0.410165	-2.23115	-0.327875	0.398186	0.33725	-1.34989	-0.649452	2.01691	1.66557	0.848465	1.20626	2.71015	1.04853	0.221523	-0.343302	1.67074	1.94199	0.95357	-0.107966	-0.133412	4.17357	1.32474
20.1	2.30802	0.99836	0.216618	-0.380144	-2.56432	0.169986	-1.15071	1.58153	2.93785	0.547057	-0.0210738	-0.905428	-1.26781	1.45093	-1.28383	-0.9885	0.819762	1.19577	0.6524	-1.47774	0.920817	-1.98037	0.648897	0.196254	-0.00457534	-0.720309	-0.660326	0.50917	-0.532697	-0.61932	-1.07204	-0.982424	-0.694602	-1.01026	0.197141	1.66557	0.644016	1.75456	2.05181	-0.222415	-0.411399	1.31402	0.567421	-0.268405	-0.397946	0.971685	0.0333527	1.20423	-0.00953019
20.4	-0.0233135	-0.873564	1.49085	-1.2574	1.85692	1.14133	0.868079	1.16806	0.523179	0.850977	-0.864053	-0.498494	-0.253562	0.640353	-0.909532	0.503576	-0.417614	0.968726	0.931502	-0.220089	-1.3472	-1.31841	0.829146	-0.6033	0.269952	-1.48217	-0.583544	0.0848618	0.548137	0.692181	0.275667	0.483881	-0.563545	-1.28086	-1.31933	1.29816	-0.173782	2.30286	4.46571	2.31948	-0.411399	0.8405	0.0945699	2.25776	0.352896	-0.647789	0.700409	2.35897	-1.15319
20.7	-0.0233135	2.5583	3.01992	-0.964981	2.29904	-0.801361	-1.15071	2.61521	2.93785	0.850977	-0.864053	-1.1089	2.18063	1.77516	-1.73298	0.752255	2.36648	0.363272	-0.394231	1.9808	-1.61937	-1.87004	-2.41534	-0.239866	0.544479	-0.99735	0.0307128	-0.268729	-0.223887	-0.255014	-0.214408	0.043989	-0.694602	-1.55147	-1.01604	0.930757	-0.582681	2.48563	4.68515	2.00174	0.981029	1.55078	2.14359	-0.268405	-1.44913	-1.18761	1.70099	1.69912	1.13413
21	0.442954	1.31035	3.01992	-0.964981	-1.90113	0.655658	-1.15071	0.961323	4.01104	1.00294	-0.864053	-1.1089	0.152137	3.55842	-1.20897	0.503576	1.12911	3.99599	0.163972	-0.848914	-0.258554	-1.09775	1.0094	-0.675986	0.269952	-0.92809	-0.737108	1.14563	1.32016	0.765042	1.37834	2.61002	-0.170374	-0.198444	-1.01604	-0.171455	-0.787131	-0.98694	5.12404	3.59042	-1.93041	1.31402	0.882655	-0.584176	0.052559	-1.18761	0.0333527	1.03927	-0.962583
21.3	0.598376	2.24631	0.471464	-0.964981	-0.353699	1.62701	0.0605633	1.78827	2.13296	1.00294	-0.864053	0.315374	-1.47066	1.45093	-1.05925	0.00621712	0.201073	3.01213	0.791951	1.66639	0.920817	-0.435792	1.18964	1.5773	0.819007	-0.166225	-0.276416	0.721325	1.47457	2.58657	0.765743	3.41649	0.615968	-0.288645	-0.409448	1.78803	-1.40048	1.02349	2.71015	-0.540152	-0.284815	1.78754	1.67074	-1.53149	0.352896	-2.26727	-0.46694	1.53416	1.51535
21.6	3.08513	0.99836	0.726309	0.497111	-1.01688	0.655658	0.0605633	2.20174	2.53541	0.850977	-0.864053	0.925775	-0.45641	1.28881	-0.385522	-0.118123	0.201073	1.12009	0.6524	1.35198	0.0136082	-0.215138	-1.69434	-1.33017	0.269952	-0.789569	-0.660326	0.0848618	1.47457	1.20221	1.50086	0.850457	0.353854	-0.378847	-0.712741	0.563353	-0.378231	0.65796	4.24626	2.00174	0.0949382	1.78754	2.93167	0.994679	0.352896	-0.107966	0.0333527	1.20423	0.37169
21.9	6.50443	-0.24959	2.25538	-0.380144	0.972672	0.169986	0.464321	0.134379	1.86466	-1.12451	-0.442563	1.12924	0.760684	-0.170221	-0.0860875	0.254896	0.510418	3.5419	2.25724	0.0943233	0.376492	0.888133	0.648897	-0.0218061	0.910516	-0.443267	-0.353198	0.15558	1.16576	0.765042	0.520705	-0.322587	1.40231	-0.649452	-0.712741	1.05323	-0.582681	0.10966	1.61292	0.413057	3.6393	2.97134	2.14359	0.678908	0.803402	-0.647789	0.867174	2.35897	-1.15319
22.2	0.287532	0.374385	-1.05761	-0.380144	-0.353699	-0.801361	-0.343195	-0.692566	0.120734	1.76274	-0.864053	0.111907	-0.0507124	-1.46714	0.213347	-0.118123	1.12911	1.72554	1.69903	-0.220089	-0.0771128	0.777806	-0.612847	1.79536	1.18504	-0.720309	0.721752	-0.551601	-0.0694824	1.7851	0.153148	0.043989	-1.08777	-0.829856	-1.01604	1.29816	-0.787131	-1.71801	3.58793	0.413057	1.48737	-1.05358	1.51312	-1.84726	-0.548115	1.51151	0.867174	3.67868	0.37169
22.5	0.287532	0.374385	-0.547918	0.204692	-1.45901	0.655658	0.464321	-0.279094	-0.147564	0.0911759	-0.864053	0.111907	-0.0507124	0.478239	-2.10727	0.379236	0.201073	1.4985	-0.603557	-1.47774	-0.349275	0.777806	-2.59559	-0.821359	-1.19419	0.318598	-1.58171	-0.622319	-1.76794	-1.05649	1.74589	-0.835794	0.747025	0.252565	-0.409448	1.9105	-1.40048	1.02349	0.954586	2.00174	1.61395	1.31402	1.67074	-0.584176	-0.247778	-1.72744	0.366881	2.19401	0.562301
22.8	-1.26669	1.62233	-1.82214	-0.380144	0.530548	0.169986	2.07935	0.341114	-1.0866	2.06666	-0.442563	1.53618	-0.253562	-0.332335	-0.834673	-0.242462	-0.726958	-0.090818	0.582625	1.03756	-0.893601	-0.435792	-2.59559	-0.821359	-0.187594	-0.789569	-0.42998	-0.339447	-0.0694824	2.00368	-0.827002	-0.982424	-0.563545	-0.739654	-1.01604	2.64531	-0.173782	0.65796	-1.23986	0.730794	1.36078	-1.05358	0.882655	-0.268405	-0.247778	-1.18761	0.533646	0.379415	-0.200141
23.1	-0.645003	0.374385	-0.293072	-0.0877252	-0.574761	1.14133	0.868079	-0.0723576	-1.3549	-0.516665	-0.864053	-1.1089	-1.47066	-0.656565	-1.05925	0.00621712	-1.0363	0.0605455	1.07105	0.0943233	0.648654	0.226171	0.468648	-0.748673	0.819007	-0.443267	0.568188	-0.905192	-0.841507	-0.0364306	-0.827002	0.19062	-0.432488	-0.0180404	-0.409448	1.29816	-0.787131	0.292427	0.954586	-0.222415	1.86712	-0.580063	0.409804	-0.899948	0.352896	1.51151	-0.967232	-0.445401	-0.390751
23.4	-1.73296	-0.873564	0.216618	-0.0877252	-0.353699	-0.801361	-0.746951	0.547851	-1.89149	2.06666	-0.864053	-0.905428	-0.45641	-0.49445	1.11165	-1.11284	-1.0363	0.438954	0.443074	-0.534501	0.830096	0.115844	0.108149	1.86805	3.01523	0.457119	-0.42998	0.50917	-0.532697	0.546458	-0.336927	0.777142	1.00914	1.06438	-0.106153	-0.661327	-2.21828	0.65796	2.27126	0.413057	-0.15823	-0.580063	0.0945699	-1.53149	-1.14879	-0.107966	0.700409	1.53416	2.84963
23.7	-0.178736	2.24631	1.236	-0.672563	-0.795823	2.11268	0.464321	-2.55319	0.925625	1.1549	-0.864053	2.96045	-0.0507124	0.478239	0.288206	-0.366802	-2.27368	0.893044	0.0244215	-0.220089	0.0136082	-0.987428	-0.0720999	2.88566	1.91712	-0.0277043	0.798534	1.42851	-0.687102	0.910764	0.765743	0.410565	0.484911	0.793775	1.10702	-0.171455	0.235117	1.93733	0.296251	0.730794	-2.18358	1.07726	-0.851131	-0.268405	0.803402	-0.647789	-0.633704	0.544378	0.752912
24	-0.489581	0.686372	1.236	-1.54982	-0.353699	4.54105	0.0605633	0.961323	1.05977	0.547057	-0.864053	1.33271	-0.45641	0.316124	-3.23015	-0.864161	-0.417614	0.287591	-0.045354	3.86728	0.0136082	-1.31841	-0.612847	1.72267	1.64259	-0.99735	0.0307128	-0.127293	-0.223887	0.546458	-0.704483	0.117304	-1.34989	-0.649452	1.10702	0.195949	0.235117	0.475194	0.954586	-2.12883	0.474691	-0.343302	1.82836	-0.899948	0.803402	-1.18761	0.533646	2.85386	1.89657
24.3	0.132109	2.24631	-2.07699	-1.2574	1.4148	-0.315687	0.464321	-0.692566	-1.6232	-0.972545	-0.864053	-0.498494	0.557835	0.478239	-1.58326	-0.491142	-0.108271	-0.62059	0.6524	3.55286	-0.0771128	-1.53906	1.36989	0.268941	-0.462121	0.110817	0.952098	0.367734	2.86421	0.182153	0.765743	0.483881	-0.432488	-1.01026	1.71361	1.17569	-0.173782	0.10966	0.735141	0.730794	2.8798	2.0243	2.30121	0.0473661	-0.998621	-0.647789	0.867174	2.02905	0.37169
24.6	-1.11127	0.686372	-0.802763	-0.672563	1.85692	0.169986	-0.343195	-1.31277	-0.952455	-0.364704	-0.864053	-0.295027	-0.862109	2.58573	-0.684956	-1.11284	-1.0363	0.590317	1.28038	4.18169	1.82803	0.00551636	1.18964	1.64999	1.27655	-0.374006	0.414623	-0.480883	0.393733	-0.255014	-0.459446	0.117304	-0.563545	0.162363	0.197141	-0.906264	0.235117	-0.0731069	2.92959	0.413057	1.61395	1.31402	0.0945699	0.0473661	1.40408	1.51151	0.200117	1.53416	-0.962583
24.9	-0.334158	1.31035	1.49085	0.497111	-0.574761	-0.315687	-1.95822	-1.51951	-0.952455	-1.42843	-0.864053	-2.3297	-0.862109	1.77516	-1.05925	0.254896	-1.0363	2.25532	0.6524	1.66639	-0.258554	-0.435792	1.36989	0.632374	0.910516	-1.48217	0.491406	-0.268729	2.401	-0.400736	0.398186	0.997088	0.484911	0.613372	-0.409448	0.195949	-0.173782	0.475194	0.296251	2.63721	1.86712	-0.816823	2.14359	0.678908	0.202728	0.43186	0.366881	0.709342	0.562301
25.2	0.598376	-0.873564	0.216618	-0.964981	1.63586	-0.315687	-1.55447	-0.48583	-1.89149	-1.58039	-0.864053	-2.3297	-2.0792	3.23419	-1.88269	-1.73454	-0.108271	0.514636	-0.11513	1.35198	-0.0771128	0.115844	-0.432598	0.123567	1.27655	-0.374006	-0.199634	1.92353	1.32016	0.910764	0.765743	-0.322587	-0.170374	0.432968	0.197141	-0.416392	-0.378231	0.65796	0.515696	-1.49336	1.36078	-1.05358	1.35551	1.31045	1.70441	0.43186	0.700409	1.69912	-1.3438
25.5	-0.334158	1.31035	0.216618	0.204692	2.5201	-0.315687	-0.746951	-0.899302	-1.89149	-0.972545	-0.864053	-0.905428	-0.45641	1.61304	-0.0860875	-1.11284	-1.34565	0.665999	-0.324456	0.408736	-1.80081	-1.53906	-0.973346	0.341627	0.361461	-1.75922	-0.506762	0.862761	-1.45913	-0.255014	-0.459446	-0.982424	-0.170374	-1.46127	1.71361	-0.538859	-0.173782	0.65796	0.515696	0.730794	1.10761	0.8405	-0.851131	-0.584176	1.55424	1.51151	0.700409	3.84364	0.943521
25.8	-0.645003	-0.24959	0.216618	0.204692	2.74117	-0.801361	-1.55447	-0.0723576	-1.0866	-0.972545	-0.864053	-2.12623	-0.45641	-0.81868	0.437923	-0.491142	-0.108271	-0.696272	-0.603557	-2.42098	-0.167834	-0.656447	-0.432598	0.341627	0.635988	-0.0969646	-0.660326	0.226298	-0.687102	1.05649	0.643224	0.630511	0.747025	0.432968	2.92679	1.17569	0.0306672	0.292427	1.39348	0.413057	0.854445	1.55078	0.725038	-0.584176	-0.0976097	0.43186	0.867174	1.53416	0.37169
26.1	-0.489581	0.99836	-1.05761	-0.672563	-0.353699	-0.801361	-2.36198	0.961323	-2.15979	-0.668625	-0.864053	-2.3297	-1.26781	0.640353	-2.55642	-0.242462	0.510418	1.12009	0.373299	2.60963	-0.80288	-0.104811	0.468648	0.850434	0.635988	-1.41291	-0.81389	1.14563	1.01135	0.546458	2.35849	1.0704	0.484911	-0.739654	0.197141	-0.0489871	0.439566	-1.53524	-1.23986	0.0953214	1.9937	-0.343302	2.93167	1.94199	0.95357	2.05134	-1.134	0.214452	2.08718
26.4	0.442954	0.686372	-1.05761	-0.964981	-0.353699	0.655658	-0.343195	-2.75993	-0.952455	2.6745	-0.864053	-1.1089	-0.862109	0.640353	-1.58326	-0.864161	-0.417614	1.34713	1.35015	-0.220089	0.0136082	0.115844	1.55014	-0.167179	1.00202	1.3575	0.414623	0.0848618	0.548137	0.983625	0.643224	0.117304	0.484911	0.252565	1.41032	1.9105	-0.378231	-2.81461	-0.581529	1.04853	0.474691	-1.5271	1.98597	0.363136	-2.35014	-1.72744	-0.633704	-0.775327	-0.00953019
26.7	1.37549	0.374385	0.981155	0.497111	4.06754	-0.801361	-2.36198	-0.0723576	-1.6232	-0.668625	-0.864053	-0.905428	-1.67351	-0.49445	-1.20897	0.130557	-1.65499	1.87691	1.55948	0.723149	0.104329	0.00551636	-2.59559	0.850434	1.18504	-1.06661	-0.42998	-0.268729	-0.0694824	1.05649	1.01078	0.703826	-0.170374	0.793775	-0.712741	-0.293923	-0.173782	-1.53524	-0.800975	0.0953214	-0.411399	-2.23739	-0.535898	-0.584176	0.052559	1.51151	-0.800468	-0.445401	-1.3438
27	-0.645003	0.99836	-0.802763	-0.964981	2.74117	-0.315687	-0.343195	-0.899302	0.120734	0.395096	-0.864053	-1.51583	-0.253562	-1.95348	-0.909532	-0.366802	-1.65499	0.817362	-0.394231	1.03756	-0.439996	0.667479	-0.0720999	-0.239866	0.178443	-0.304746	-0.0460691	0.579889	1.32016	0.400736	-0.704483	0.410565	1.1402	-0.288645	-0.409448	1.9105	-0.582681	-1.53524	-1.23986	-0.540152	0.601276	0.8405	0.252187	-3.11034	2.30509	2.05134	0.0333527	0.379415	0.752912
27.3	-0.800426	1.93432	-0.547918	-0.0877252	2.29904	-0.801361	-1.95822	-0.48583	-0.281712	-0.516665	-0.864053	-2.53316	-1.26781	-0.170221	-1.28383	0.379236	-1.0363	1.27145	-0.533782	2.29521	-0.439996	0.777806	-0.0720999	-1.11211	-0.55363	-1.75922	-0.583544	-0.834474	1.62897	1.63938	-0.091889	0.117304	-1.48094	-0.288645	0.500436	1.78803	-1.40048	-0.804174	1.39348	-1.17563	1.2342	0.8405	0.725038	0.0473661	-1.74946	-0.107966	0.867174	1.86408	-0.771973
27.6	-0.178736	1.31035	-0.0382264	0.497111	-0.795823	2.59835	-1.55447	-1.51951	2.26711	-0.516665	-0.864053	-0.905428	-0.862109	0.478239	-2.10727	-1.36152	0.201073	0.287591	-1.09199	1.35198	-0.893601	0.115844	-1.15359	0.559687	-0.0960845	0.110817	-0.0460691	0.297016	-1.76794	-1.42079	-0.949521	-0.175957	-0.039317	-0.920058	-0.409448	0.685821	2.27961	1.38903	0.735141	0.0953214	1.86712	0.366978	0.409804	0.678908	0.95357	0.43186	-0.300175	4.66846	0.752912
27.9	1.53091	2.5583	-1.82214	0.497111	1.19373	0.655658	1.27184	1.16806	1.05977	0.699016	-0.864053	-1.92276	-1.06496	0.316124	-1.43354	0.130557	1.43845	-0.998999	0.163972	-0.534501	-0.349275	-1.98037	0.829146	0.196254	0.910516	0.110817	-1.27458	0.721325	1.16576	-0.0364306	-1.19456	-0.909109	-2.00517	-2.00248	-0.409448	0.685821	1.87071	-0.804174	0.515696	-0.222415	0.981029	2.26106	1.67074	-0.584176	1.25391	1.51151	0.200117	2.85386	1.70596
28.2	0.753799	1.62233	-0.802763	-0.964981	2.29904	0.169986	-1.95822	0.134379	-0.147564	-0.972545	-0.864053	-1.31236	-0.0507124	1.28881	-0.235805	-0.366802	2.05714	-0.090818	-0.324456	1.03756	-1.25648	-1.64939	-0.612847	0.0508807	0.819007	-0.0277043	1.10566	-0.905192	-1.61353	-0.109292	0.275667	-0.469218	-1.21883	-0.469049	-0.409448	-0.538859	0.0306672	0.10966	-1.23986	-2.12883	0.981029	1.07726	-0.220664	0.0473661	-0.998621	0.971685	0.700409	0.544378	1.51535
28.5	4.63936	0.686372	0.726309	1.08195	0.0884244	-0.315687	-2.36198	0.134379	0.120734	1.00294	-0.864053	0.315374	0.152137	0.964583	-2.25699	1.37395	3.60386	-0.544908	-0.184905	-1.47774	-1.25648	-0.546119	-1.51409	-0.6033	0.819007	-0.166225	1.71992	-1.25878	1.78338	-0.109292	1.62337	1.0704	-1.34989	-0.198444	1.71361	-0.661327	-0.378231	-1.71801	-1.67875	-0.857889	-0.15823	-1.05358	-0.693515	-1.84726	2.30509	0.43186	-0.800468	0.709342	-0.390751
28.8	2.1526	-0.873564	-1.05761	1.08195	1.85692	0.169986	-1.95822	-0.279094	1.99881	0.699016	-0.864053	1.12924	0.760684	2.58573	-3.23015	-0.491142	2.98517	0.287591	-0.394231	0.408736	-0.621438	0.00551636	-1.51409	-1.33017	-1.10268	-2.17478	0.568188	-0.622319	-0.0694824	-1.12935	-0.581964	-2.74199	-1.21883	-1.28086	-0.409448	0.440885	-0.378231	0.10966	0.515696	0.413057	-1.04432	0.366978	0.0945699	-0.268405	-0.548115	1.51151	-0.133412	0.379415	-1.72502
29.1	0.287532	0.99836	0.471464	-0.672563	0.75161	1.14133	-0.746951	-0.279094	1.59637	1.45882	-0.864053	-0.0915603	-0.45641	1.77516	0.213347	0.503576	0.819762	-1.52877	-1.09199	-0.534501	0.920817	-0.104811	-0.612847	-1.98435	0.269952	0.0415562	-0.276416	-0.339447	-1.30472	-2.51371	-2.90982	-1.86221	-0.301431	-1.10046	0.500436	1.78803	-0.787131	0.475194	1.83237	-0.540152	1.36078	-1.05358	-0.220664	-1.84726	0.052559	0.43186	-1.46753	0.709342	-0.200141
29.4	0.442954	3.18227	0.216618	0.497111	0.972672	0.169986	-1.95822	-1.51951	1.19392	0.547057	-0.864053	-0.498494	-1.06496	0.964583	0.138488	-0.242462	2.05714	-0.0151363	-0.184905	-1.79215	-0.439996	-0.987428	-2.59559	-0.966733	-0.00457534	-1.41291	-0.0460691	-0.763756	-2.07675	-2.36799	-1.31708	-1.20237	-2.13623	-1.64167	-1.01604	0.808289	-0.582681	-1.53524	-1.67875	1.684	1.2342	1.07726	-1.00875	-0.899948	-0.247778	-1.18761	-0.133412	0.049489	0.562301
29.7	1.84176	0.686372	1.236	0.204692	0.75161	0.655658	-1.15071	-1.72625	1.32807	-0.516665	-0.864053	0.315374	0.152137	0.316124	-1.58326	0.254896	1.74779	-1.52877	-1.99907	-1.16333	0.739375	-0.104811	-2.59559	-0.821359	0.45297	0.59564	0.721752	-0.268729	-1.92234	-3.89807	-1.56212	-0.909109	-0.694602	-0.198444	-1.01604	0.563353	1.25736	-2.26631	0.735141	-0.222415	0.72786	1.55078	-0.851131	-0.268405	0.052559	-2.26727	-0.800468	2.35897	-1.3438
[truncated: 188 more columns]

## Sheet: 2D - Heatmap Reward Pressers
	PL	PL	PL	PL	PL	PL	PL	PL	PL	PL	PL	PL	PL	PL	PL	PL	PL	PL	PL	PL	PL	PL	PL	PL	PL	PL	PL	PL	PL	PL	PL	PL	PL	PL	PL	PL	PL	PL	PL	PL	PL	PL	PL	PL	PL	PL	PL	PL	PL
	EXPJF20 1O1	EXPJF20 1O1	EXPJF20 1O1	EXPJF20 1O1	EXPJF20 1O1	EXPJF20 1O1	EXPJF20 1O1	EXPJF20 1O1	EXPJF20 1O1	EXPJF20 1O1	EXPJF20 1O1	EXPJF125 1G2	EXPJF125 1G2	EXPJF125 1G2	EXPJF125 1G2	EXPJF125 1G2	EXPJF125 1G2	EXPJF123 4G2	EXPJF123 4G2	EXPJF123 4G2	EXPJF123 4G2	EXPJF123 4G2	EXPJF123 4G2	EXPJF123 4G2	EXPJF123 4G2	EXPJF123 4G2	EXPJF123 4G2	EXPJF123 4G2	EXPJF123 4G2	EXPJF123 4G2	EXPJF123 4G2	EXPJF123 4G2	EXPJF123 4G2	EXPJF123 4G2	EXPJF166 5M2	EXPJF166 5M2	EXPJF166 5M2	EXPJF166 5M2	EXPJF166 5M2	EXPJF166 5M2	EXPJF166 5M2	EXPJF166 5M2	EXPJF166 5M2	EXPJF166 5M2	EXPJF166 5M2	EXPJF166 5M2	EXPJF166 5M2	EXPJF166 5M2	EXPJF184 8T2
	SPK08a	SPK17a	SPK18a	SPK19a	SPK20a	SPK21a	SPK22a	SPK23a	SPK27a	SPK31a	SPK31b	SPK01a	SPK01b	SPK02a	SPK05a	SPK05b	SPK11a	SPK05a	SPK05b	SPK06a	SPK07a	SPK07b	SPK12a	SPK14a	SPK14b	SPK15a	SPK15b	SPK18a	SPK19a	SPK19b	SPK20a	SPK20b	SPK22a	SPK22b	SPK01a	SPK07a	SPK15a	SPK16a	SPK18a	SPK18b	SPK19a	SPK19b	SPK21a	SPK23a	SPK24a	SPK25a	SPK27a	SPK32a	SPK21a
-30	4.15391	1.42625	1.35164	0.317681	-4.39417	-0.223607	-0.0677243	0.0266363	0.359134	1.38312	NaN	-1.20329	-0.608766	0.232989	1.00039	-0.14576	-0.385238	-0.52318	-2.16306	-1.28495	-0.0528222	1.04949	-2.16296	-0.697071	-2.81378	0.198812	-0.429755	-0.62025	-0.987872	-0.553702	-0.193395	-1.95295	-0.457625	0.214696	-0.324893	0.826126	-0.212776	-0.504557	-2.75159	-0.418301	-0.458564	-0.961616	-1.53164	-0.505582	1.00104	-1.89429	-0.479959	-1.58455	0.940194
-29.7	3.92815	-2.43652	-0.810982	1.47289	-3.91912	-0.223607	-0.91428	-0.506087	0.73717	0.395177	NaN	-2.03314	-1.54533	0.137891	-1.12434	2.56121	0.315194	-0.52318	0.139088	0.628806	-0.757116	-0.0376313	2.18271	-1.56011	-1.37328	-0.444404	-0.188771	-1.39556	-1.97574	-0.224118	-1.27641	-0.960978	-0.861411	0.11246	-0.324893	-1.00971	0.17409	-0.985087	-2.44067	-1.52325	-1.04087	0.17714	-1.53164	-1.4686	0.0361823	1.23031	-1.35261	-1.70236	-1.41029
-29.4	4.37966	-0.6537	-0.810982	-0.259921	-5.18591	-0.223607	-0.0677243	0.0266363	0.359134	-0.263451	NaN	-0.207463	-0.920952	-1.09838	-1.03581	3.1859	-0.385238	1.48905	-1.10791	0.902201	-0.522351	0.380494	1.98518	-0.564296	-0.31691	-0.795249	-1.39369	-0.177214	-0.141125	0.171384	0.734901	-0.83698	-0.996006	0.725875	-0.324893	0.367167	0.560955	-1.62579	0.823922	-0.418301	0.269316	-0.0759168	-1.53164	-0.264829	0.0361823	-2.67544	-0.479959	-2.76265	-1.95271
-29.1	-0.361209	-1.84224	0.270327	-0.837525	-3.91912	-0.223607	0.101587	-0.772449	1.49324	-1.58071	NaN	-0.0414927	0.639983	-0.717986	-0.0619715	0.895384	-1.7861	0.684157	-0.724217	-1.01156	-1.57879	-1.12476	1.39259	-0.365133	-1.18121	-0.444404	-0.510083	-1.61708	-0.564498	0.0395501	-0.0386789	-0.960978	-0.59222	-0.705428	-0.324893	-0.0917913	-0.212776	-1.14526	-1.04156	-0.733999	0.414891	-0.328974	-1.53164	-0.0240753	-0.205032	-1.11314	1.26535	-1.82017	-2.49513
-28.8	2.1221	-1.24797	-1.35164	-0.837525	-4.07747	-0.223607	-0.91428	-1.57153	-1.53104	-0.922078	NaN	-0.207463	0.639983	0.423184	-1.3014	0.0624687	-0.618714	-1.59637	-0.148681	-1.01156	0.181943	-0.0376313	-1.57037	-0.365133	0.0672232	0.666606	0.132541	-1.2848	-0.846748	-0.224118	0.425469	-1.58096	0.484543	1.33929	-0.324893	-0.321271	-0.212776	0.937034	-0.264277	-0.418301	0.706043	-0.328974	-0.13924	0.457432	-0.446245	-0.331989	2.138	-0.877686	-0.506258
-28.5	0.541814	-0.950836	-0.270328	2.05049	-3.60243	-0.223607	-0.744969	-2.63698	-0.774972	-0.922078	NaN	0.290449	2.8253	0.423184	1.26599	1.7283	-0.618714	0.281712	-0.244603	-0.46477	0.651472	-0.372131	0.207407	-0.896234	-2.14154	0.549658	-0.590411	-0.509491	-0.564498	-1.80612	-0.348111	2.38694	0.215353	1.13482	-0.324893	0.826126	0.560955	0.296327	-1.81885	-0.891848	0.851619	-0.202445	-1.53164	-0.987089	0.0361823	-1.89429	-1.35261	-0.759876	-0.325452
-28.2	0.993325	-0.6537	-0.270328	-0.259921	-0.752155	-0.223607	-1.42221	-0.506087	3.38342	-0.922078	NaN	-0.705375	0.952171	0.518281	-1.03581	1.7283	-0.852191	-0.254882	-0.724217	0.902201	1.23838	0.129619	-0.582715	0.697071	0.451357	0.958977	0.935822	-0.398733	0.141125	-1.34471	-0.193395	-0.588986	-0.0538384	1.54376	-0.324893	1.74404	-0.599642	-0.664734	-1.19702	-1.0497	-0.312988	-0.328974	-0.13924	-2.19086	1.48346	-2.28487	-0.479959	-0.642066	0.940194
-27.9	2.34786	-0.356563	2.43295	2.6281	-2.81069	4.24853	-0.91428	-0.239725	4.51752	1.0538	NaN	-1.20329	1.57655	0.232989	1.79717	0.895384	-0.852191	-1.05977	-2.25898	0.0820179	0.299325	-0.0376313	-1.57037	0.0331938	0.931523	0.958977	-0.590411	-0.287973	-0.846748	-1.41062	-0.0386789	-1.82896	-0.861411	0.316931	-0.324893	1.28508	0.17409	-0.82491	-1.66339	-1.83894	-0.749716	0.556725	-1.53164	-0.746335	-1.65231	-0.722564	0.392695	-1.70236	-0.506258
-27.6	4.15391	0.237709	-0.810982	2.6281	-3.60243	-0.223607	-0.237036	2.15753	1.87128	-0.263451	NaN	-1.86717	-1.23314	0.518281	-1.83258	-1.39513	0.548672	-2.93785	-3.02637	0.355412	-0.170205	-0.204881	-1.17531	-0.43152	-1.85344	-0.268981	0.212869	0.265822	-0.423374	-0.421868	-0.502827	-0.960978	-1.2652	0.0102236	-0.324893	0.367167	0.560955	-0.0240267	-0.730648	-1.0497	-0.312988	-1.46773	-0.13924	-0.746335	0.277395	-1.11314	-1.35261	-1.70236	-0.506258
-27.3	0.993325	-0.0594267	-1.35164	2.6281	-2.17729	-0.223607	1.62539	0.292998	3.38342	0.395177	NaN	-0.0414927	-0.920952	-0.147401	-1.03581	-0.14576	0.548672	-1.59637	-1.4916	0.628806	-0.99188	0.0459937	-0.977777	-0.365133	0.451357	-0.561352	-0.269099	-0.287973	-0.846748	-0.0922837	-1.12169	-1.82896	-0.861411	-0.39872	-0.324893	-0.0917913	1.33469	-0.82491	0.668465	-2.15464	-0.0218365	-0.835087	-1.53164	-1.22784	-0.205032	-1.11314	-1.35261	-0.877686	-0.687064
-27	4.83117	0.534845	2.9736	4.36091	-3.91912	-0.223607	-0.91428	-0.239725	3.38342	1.38312	NaN	-0.207463	0.327797	0.803573	0.380681	1.7283	-0.618714	-1.05977	-0.724217	-1.01156	-1.34403	-1.71013	1.39259	-1.56011	-0.60501	0.257287	-1.15271	-0.509491	-0.141125	-0.487785	-0.966974	-1.82896	-0.457625	-1.11437	-0.324893	2.203	0.947821	0.13615	-0.575191	-1.52325	0.706043	-0.582031	-1.53164	-0.987089	-0.205032	-1.50372	0.392695	-2.40922	-0.325452
-26.7	3.25088	-1.24797	0.810983	0.895285	-3.28573	-0.223607	-0.406347	1.09208	5.65163	0.0658627	NaN	0.124478	-1.23314	-1.19347	-2.98348	-0.978675	-0.618714	0.013415	-0.82014	-0.191375	-1.34403	-1.29201	-0.582715	-0.896234	0.355324	-1.08762	-0.992052	-0.287973	-1.55237	-0.751453	-0.812258	-2.57294	-1.66898	-0.39872	-0.324893	0.596646	0.560955	-0.504557	-2.28522	-1.83894	0.706043	-1.3412	-0.13924	-1.9501	-0.687459	0.839737	-1.35261	-1.82017	-0.506258
-26.4	5.28269	-0.6537	2.43295	3.2057	-3.12738	-0.223607	0.60952	0.559359	6.4077	0.724491	NaN	0.456419	0.639983	-0.717986	-0.0619715	0.478926	-2.01958	-0.254882	-1.01199	1.44899	-2.04832	-1.12476	-1.17531	-0.0995817	0.739457	-0.678301	-0.831395	-0.952528	-0.282249	1.16014	-1.27641	-0.960978	-1.1306	-0.705428	-0.324893	0.367167	-0.986508	0.13615	-1.66339	-0.891848	-0.895292	-0.455502	-0.13924	1.6612	-0.928672	0.0585858	-0.479959	-0.642066	-0.687064
-26.1	2.79937	-0.0594267	0.810983	-0.259921	-1.70225	-0.223607	-0.237036	0.825721	3.00538	-0.263451	NaN	-0.207463	0.0156095	-1.19347	-0.593154	1.93653	-2.48653	0.415861	-0.82014	1.17559	0.416707	-0.539381	-0.977777	-0.497908	0.0672232	-0.152033	-0.510083	-0.841769	-0.846748	-1.01512	-0.812258	-1.08497	-1.1306	0.11246	-0.324893	1.97352	0.947821	1.09721	-2.28522	-0.102602	-0.60414	0.430197	-1.53164	-0.264829	-0.446245	-0.722564	-0.479959	-1.58455	-0.506258
-25.8	3.47664	-0.6537	0.810983	-0.837525	-2.96903	-0.223607	-0.91428	-0.239725	3.38342	-1.25139	NaN	0.124478	0.639983	-1.19347	-0.416093	0.895384	-1.7861	1.89149	0.235011	-0.738164	-0.639734	0.464119	-0.977777	-0.630683	-0.412944	-0.0935588	-0.590411	1.37341	-0.987872	0.632802	-1.89527	0.402991	0.215353	-0.194249	2.92404	1.97352	1.33469	0.456504	-1.81885	-1.52325	-1.62317	-0.835087	-0.13924	-0.505582	0.518609	-0.331989	2.138	-2.05579	-0.687064
-25.5	3.02513	-1.24797	-0.270328	2.6281	-3.91912	-0.223607	-0.91428	0.825721	1.1152	-0.922078	NaN	-0.705375	-2.1697	-0.147401	0.557742	-0.562217	0.315194	-0.389031	0.330934	0.902201	-0.404969	-0.790256	-1.17531	1.69289	2.17996	0.666606	-1.07238	0.0443035	-1.69349	0.962387	0.580185	-1.33297	-1.1306	0.419167	-0.324893	-0.0917913	0.17409	-0.985087	-1.9743	-1.0497	-1.4776	0.683253	-0.13924	-1.70935	-1.16989	-1.50372	-0.479959	-0.759876	-0.144645
-25.2	1.67059	0.237709	-0.810982	-0.259921	-3.12738	-0.223607	-1.42221	-0.239725	-1.53104	-1.25139	NaN	-1.86717	-2.79408	-0.337596	-1.12434	0.478926	-1.55262	-2.40126	-1.87529	0.628806	-0.757116	0.464119	-1.57037	1.0954	0.83549	0.140338	-0.510083	0.376581	-0.423374	-0.751453	-1.27641	-2.32495	0.349948	-0.807664	-0.324893	1.28508	-0.599642	-0.0240267	-1.9743	-1.3654	0.997195	-0.455502	-1.53164	-0.0240753	-1.16989	-0.331989	-0.479959	-1.11331	-1.41029
-24.9	3.02513	-0.950836	-0.810982	1.47289	-2.01894	-0.223607	-0.744969	-0.772449	-0.018902	0.395177	NaN	-2.69702	-0.920952	-1.95425	0.20362	1.31184	1.01563	-1.19392	-2.16306	1.17559	-0.404969	-0.623006	-1.57037	0.962622	0.355324	1.07593	-1.39369	-0.952528	-0.423374	-2.13571	0.889616	-1.58096	0.88833	0.828111	-0.324893	0.826126	-0.599642	-0.985087	-2.44067	-1.3654	0.269316	-0.455502	1.25316	1.17969	-0.446245	0.449162	-0.479959	-1.46674	0.0361614
-24.6	1.44484	-1.54511	0.810983	1.47289	-0.435458	-0.223607	-1.59152	-0.506087	-0.774972	0.395177	NaN	-0.705375	1.88873	-0.527791	-1.38993	0.687155	1.71606	-1.86466	-1.29975	-1.01156	0.181943	-1.45926	0.799999	0.630683	-0.220877	0.666606	-1.63468	-0.398733	-0.846748	-0.81737	0.270753	-1.70496	-1.39979	-1.21661	-0.324893	1.51456	-0.212776	-1.94615	-3.37342	-0.733999	1.5795	-1.08814	-1.53164	-1.70935	0.277395	-0.722564	-0.479959	-1.11331	-1.41029
-24.3	1.21908	0.237709	-1.35164	2.05049	-2.65234	-0.223607	-1.2529	0.0266363	-0.396938	0.395177	NaN	-1.53523	-0.920952	-0.717986	-1.21287	1.10361	1.71606	-2.53541	-2.06714	-1.55835	0.768854	-0.706631	-2.16296	1.75927	0.25929	0.72508	0.293198	-1.72784	-1.97574	-0.487785	0.116037	-2.57294	-0.323029	-0.296484	-0.324893	4.49779	0.560955	-0.504557	-1.81885	-0.418301	-0.0218365	-0.0759168	-0.13924	-2.43161	1.72468	-0.331989	0.392695	-0.877686	-0.325452
-24	3.47664	-1.84224	-1.89229	0.317681	-1.38555	-0.223607	-0.575658	-2.10426	-1.53104	-0.592765	NaN	-2.53105	-1.23314	-1.00328	-1.03581	-0.14576	1.48258	-4.14519	-1.39568	0.902201	1.23838	-0.288506	-1.37284	-0.962622	-0.0288099	0.315761	-0.590411	-2.17088	-2.11687	-1.87204	0.116037	-1.20897	0.619139	-0.603192	-0.324893	1.05561	-0.986508	-2.10633	-1.66339	-1.3654	-1.18644	0.0506112	-1.53164	-0.505582	-0.928672	0.449162	-0.479959	0.0647957	0.397774
-23.7	3.25088	-1.84224	-1.35164	4.36091	-0.752155	-0.223607	0.948142	-1.30517	-1.53104	0.0658627	NaN	-1.03732	-0.920952	-0.432694	-3.3376	0.687155	0.782148	-1.73052	-0.82014	1.17559	-0.757116	-1.12476	0.00987662	-0.896234	-0.31691	-0.502878	-1.15271	-1.17405	-1.55237	0.500969	-0.193395	-1.58096	-0.0538384	-0.194249	-0.324893	1.28508	-0.212776	-1.30544	-0.730648	-0.57615	-0.60414	-0.582031	-0.13924	-0.0240753	-0.687459	-1.50372	-1.35261	-0.524255	-0.867871
-23.4	0.993325	-1.24797	-0.810982	0.895285	-2.33564	-0.223607	1.11745	-2.10426	-1.15301	0.395177	NaN	-1.36926	0.327797	0.0427938	-1.56699	-2.01982	1.01563	-3.87689	-1.10791	-0.191375	-0.757116	-1.12476	-0.977777	-1.89205	0.83549	-0.736775	-0.831395	-0.62025	-1.83462	-1.14695	-1.12169	-2.69694	-2.07277	-1.93226	-0.324893	0.367167	-0.986508	-1.30544	-0.419734	1.47589	-1.62317	-0.835087	2.64556	-0.0240753	-0.928672	-0.331989	-1.35261	-0.288635	-0.506258
-23.1	1.21908	-0.356563	-0.810982	2.05049	-1.38555	-0.223607	0.270898	-0.772449	-0.396938	1.38312	NaN	-0.705375	-2.48189	-1.00328	-0.681684	0.0624687	1.01563	-2.53541	-2.25898	-0.46477	-1.34403	-1.37563	-0.780246	-0.630683	-0.124843	-0.795249	-1.715	-2.28164	-1.129	-2.13571	-1.27641	-1.58096	-1.53439	-0.807664	-0.324893	0.367167	-1.76024	0.616681	-2.28522	-1.3654	-1.62317	-0.0759168	-1.53164	0.938938	-1.89353	-0.722564	0.392695	0.771657	-0.867871
-22.8	3.02513	-0.6537	-0.810982	0.317681	-3.12738	4.24853	-1.2529	0.559359	0.73717	-0.592765	65535	-1.53523	-1.85751	-1.66896	-0.947276	1.10361	0.782148	-0.52318	-1.20383	1.99578	-1.81356	-1.79376	-1.37284	-0.497908	-0.797077	-1.02915	-1.95599	-2.28164	-0.282249	-1.01512	-0.812258	-2.32495	-1.53439	-1.21661	2.92404	0.367167	0.17409	-0.504557	-1.50793	-0.57615	-1.04087	1.44242	-0.13924	-0.746335	-0.446245	-1.11314	-1.35261	-0.759876	0.578581
-22.5	5.28269	-1.84224	-1.35164	4.36091	-2.65234	-0.223607	-1.08359	-2.10426	-1.15301	-1.25139	NaN	-0.0414927	-2.48189	-0.908181	-1.47846	0.687155	1.48258	-1.99881	-2.45083	-1.28495	-1.46141	-1.20838	-2.95308	-2.09121	-1.18121	-1.37999	-0.911724	-1.61708	0.141125	-2.00387	-2.2047	-2.44894	-3.55332	-1.83002	-0.324893	-0.321271	-0.986508	-0.985087	-0.886105	-0.260451	0.414891	-0.202445	1.25316	0.457432	-0.205032	-0.722564	-0.479959	-0.406445	0.578581
-22.2	2.34786	0.237709	-1.35164	1.47289	-2.81069	-0.223607	-1.2529	-1.57153	-0.774972	-0.263451	NaN	-1.20329	0.952171	-0.242498	-0.947276	0.478926	1.94953	-1.99881	-0.724217	-0.738164	-2.04832	-1.04113	-0.780246	-1.22817	-0.412944	-0.853724	-0.992052	-1.39556	-0.141125	-1.74021	-2.04999	-1.45697	-1.93818	-2.0345	-0.324893	0.596646	0.560955	-0.34438	-1.35248	0.213097	1.72507	-1.08814	-1.53164	0.938938	-0.446245	0.0585858	-1.35261	-1.82017	-0.144645
-21.9	4.60542	-0.356563	-0.810982	0.895285	-2.65234	-0.223607	0.948142	-0.772449	1.1152	1.38312	NaN	-1.7012	-3.41845	-0.337596	-1.74405	0.0624687	1.71606	-1.19392	0.139088	0.0820179	-2.1657	-0.372131	-0.385185	-1.36095	-2.81378	-1.43847	-0.831395	-0.398733	-1.69349	-0.619619	-0.812258	-2.44894	-2.07277	-2.0345	-0.324893	1.05561	-0.599642	-1.30544	-0.575191	-0.102602	0.706043	-0.582031	-0.13924	-0.505582	0.0361823	-0.722564	-0.479959	-1.93798	-1.41029
-21.6	4.37966	0.831982	-0.810982	3.7833	-1.70225	-0.223607	0.270898	-1.83789	1.87128	1.71243	NaN	-2.03314	-1.23314	1.75455	-1.21287	-0.562217	1.01563	-2.8037	-1.87529	-1.28495	-1.10926	-0.372131	-2.16296	-1.49372	-0.31691	-1.61389	-1.55435	-0.62025	-1.129	-0.0263667	-1.89527	-4.4329	-1.2652	-1.01214	-0.324893	-0.321271	0.560955	-1.46562	0.513008	-0.57615	0.12374	0.0506112	-0.13924	-1.4686	0.759823	-1.89429	3.01065	-0.288635	-0.687064
-21.3	1.44484	0.237709	-0.810982	2.05049	-2.49399	-0.223607	-0.237036	-0.772449	-1.15301	-1.91002	NaN	-0.539404	0.327797	0.613379	-3.3376	-0.353989	-0.15176	-2.26711	-1.4916	0.0820179	2.41221	-0.204881	0.799999	1.29456	1.12359	0.842029	-0.188771	0.376581	0.705623	-1.47654	1.19905	-2.32495	1.02293	1.13482	-0.324893	-1.46867	-0.599642	-0.664734	-1.04156	-0.733999	0.851619	0.683253	-0.13924	-0.505582	0.0361823	0.839737	-1.35261	-0.0530146	0.0361614
-21	0.767569	-0.6537	-1.35164	-0.837525	-4.23582	-0.223607	-0.91428	-0.239725	-0.396938	-0.922078	NaN	-1.36926	-1.23314	0.708476	-0.858745	-0.353989	0.315194	-3.072	0.0431653	-0.46477	0.0645602	0.296869	-2.16296	-1.29456	-0.412944	-0.0935588	-0.269099	-1.39556	-1.55237	-1.60837	-0.348111	-3.93691	0.0807572	-0.807664	-0.324893	-0.0917913	-0.599642	0.13615	-1.04156	0.0552471	-1.04087	0.303668	1.25316	0.938938	0.518609	0.449162	0.392695	-1.70236	-0.506258
-20.7	1.44484	-1.24797	-0.810982	1.47289	-1.06885	-0.223607	-0.91428	-0.506087	0.73717	-0.592765	NaN	0.78836	-1.23314	0.708476	1.17745	-1.81159	0.782148	-3.74274	-0.82014	-2.10513	1.35577	-0.372131	-0.780246	-0.43152	0.25929	1.1344	0.132541	-0.952528	-0.423374	-3.2563	-2.51413	-3.68891	-0.996006	-0.0920125	-0.324893	-0.78023	0.17409	-0.82491	1.29029	-0.260451	-0.749716	0.683253	-1.53164	1.17969	0.518609	0.839737	1.26535	-1.23112	0.0361614
-20.4	1.21908	0.237709	-0.810982	-0.259921	-2.96903	-0.223607	-0.406347	-0.506087	-1.15301	-0.263451	NaN	1.78418	0.639983	0.803573	0.292151	-2.6445	1.48258	-1.73052	-1.20383	0.628806	0.534089	-0.455756	-1.96543	0.43152	-0.89311	0.491183	-0.188771	-1.17405	0.141125	-0.421868	-1.43112	-0.960978	-0.59222	-0.807664	-0.324893	0.137687	0.947821	0.776857	-1.04156	0.213097	-1.4776	-0.455502	-0.13924	-0.264829	1.00104	1.62089	-0.479959	-0.170825	-0.506258
-20.1	0.767569	-0.356563	0.810983	2.05049	-3.12738	-0.223607	-1.2529	1.09208	1.87128	0.724491	NaN	-0.539404	0.639983	-0.242498	0.380681	-0.978675	1.01563	-2.66956	-1.58752	-0.191375	0.299325	-0.623006	-1.17531	1.6265	-2.14154	0.081864	-0.911724	-0.398733	-1.97574	-1.14695	0.270753	-1.70496	-1.39979	-1.52332	-0.324893	0.137687	0.560955	0.13615	-1.9743	-1.3654	-0.167412	-0.0759168	-0.13924	1.90195	1.00104	-0.331989	-1.35261	-1.34893	-0.867871
-19.8	3.02513	-0.356563	-0.270328	-1.41513	-2.49399	-0.223607	-0.744969	0.292998	1.1152	0.0658627	NaN	0.124478	2.8253	0.0427938	-0.858745	-0.562217	2.41649	-2.13296	-0.244603	-0.46477	0.0645602	-0.539381	-1.7679	0.165969	-0.989143	-0.0935588	-0.0281147	0.819617	0.564498	-0.290034	-1.27641	-3.81291	-0.457625	-1.11437	-0.324893	-0.55075	0.560955	2.5388	-1.04156	-0.891848	1.28835	-0.0759168	-1.53164	0.698184	1.72468	-1.11314	-0.479959	0.300416	0.0361614
-19.5	2.57362	-0.6537	-0.270328	2.05049	-1.2272	-0.223607	-1.59152	-1.83789	2.24931	2.04175	NaN	-1.36926	-0.296578	1.08887	-1.38993	-0.353989	1.71606	-1.59637	-1.68345	1.72238	-1.57879	-0.706631	-0.977777	1.69289	1.60376	-0.0350845	-0.510083	-0.398733	-0.141125	-1.47654	-1.27641	-2.57294	-0.188433	0.11246	-0.324893	1.05561	2.49528	1.73792	0.823922	-0.891848	0.706043	-0.328974	1.25316	1.17969	1.00104	-1.11314	0.392695	-1.34893	-0.144645
-19.2	2.34786	-0.356563	-0.810982	-1.99273	-3.12738	-0.223607	-1.42221	-1.30517	0.359134	1.38312	NaN	-1.36926	-1.85751	0.328086	-0.681684	-0.14576	0.782148	-1.46222	-0.724217	-0.191375	-3.33953	-0.0376313	-2.36049	-0.564296	-0.124843	-0.38593	-1.15271	-0.841769	0.141125	-0.158201	0.580185	-1.45697	0.215353	-0.500956	-0.324893	-1.23919	1.72155	-0.82491	0.202094	0.370946	-0.0218365	-0.455502	1.25316	0.457432	0.277395	0.839737	2.138	-0.759876	-0.144645
-18.9	0.767569	0.831982	-0.270328	0.317681	-1.86059	-0.223607	-0.575658	1.89117	-0.774972	0.724491	NaN	-0.0414927	-1.23314	-0.242498	-0.239032	0.895384	-0.15176	-0.254882	-0.0527576	0.355412	-0.99188	-0.873881	0.00987662	-0.232357	1.02756	-0.210507	-1.15271	-1.61708	-0.282249	0.237301	-1.89527	-1.58096	-1.2652	-0.296484	-0.324893	0.367167	-0.212776	0.616681	-0.419734	0.0552471	-1.4776	0.809782	-1.53164	1.90195	0.0361823	0.449162	-1.35261	-0.759876	-1.04868
-18.6	3.25088	-1.54511	-1.35164	-0.259921	-4.55252	-0.223607	-1.08359	0.825721	1.1152	-0.263451	NaN	-0.539404	3.44967	-0.622888	1.08892	0.895384	-0.852191	-1.59637	-1.20383	0.628806	0.181943	-0.372131	-2.55802	-1.16179	0.54739	-1.20457	0.132541	-1.06329	-0.987872	-0.81737	-0.348111	0.774982	-0.726816	0.419167	-0.324893	0.367167	0.560955	1.57774	-1.35248	0.686644	-1.4776	0.0506112	-0.13924	0.216678	0.0361823	-0.331989	0.392695	-2.05579	-1.04868
-18.3	2.1221	1.42625	-1.35164	-0.259921	0.0395869	-0.223607	-1.42221	-1.03881	-0.018902	0.724491	NaN	-1.03732	0.327797	-0.622888	-0.681684	-1.60336	0.548672	0.818306	-0.148681	-0.46477	1.00362	-0.372131	-0.187654	0.365132	1.21962	-0.327456	-1.15271	-0.398733	0.423374	-1.47654	-0.193395	-0.83698	-0.457625	-0.194249	-0.324893	1.51456	-0.599642	1.09721	-1.04156	-0.891848	-1.04087	-0.202445	2.64556	1.42045	0.277395	-1.11314	-1.35261	-2.88046	0.397774
-18	2.57362	-0.356563	-0.270328	1.47289	-0.752155	-0.223607	-0.91428	-1.57153	1.1152	0.395177	NaN	0.456419	-0.920952	0.0427938	-1.03581	-1.1869	1.48258	-1.19392	-1.68345	-0.191375	0.651472	1.21674	-0.187654	0.497908	-0.31691	0.0233897	0.373526	-0.952528	-1.129	-0.421868	0.734901	1.51896	-0.59222	-0.194249	-0.324893	0.137687	0.17409	0.296327	-0.575191	-0.102602	0.997195	-0.328974	-1.53164	1.6612	-0.205032	-0.331989	1.26535	-1.34893	0.397774
-17.7	0.316058	0.534845	-0.270328	-0.837525	-2.01894	-0.223607	-1.76084	-1.03881	1.87128	-0.922078	NaN	0.124478	0.952171	-0.147401	0.292151	0.0624687	0.315194	2.83053	0.714625	0.0820179	0.0645602	-0.204881	-0.187654	1.75927	0.739457	-0.0935588	0.373526	1.48417	0.705623	1.75339	-0.348111	1.89096	1.42671	-0.194249	-0.324893	0.137687	0.947821	0.937034	-0.886105	-1.3654	-0.458564	-1.08814	-1.53164	-0.746335	1.96589	-1.50372	1.26535	-2.88046	-1.04868
-17.4	1.67059	1.72339	-0.810982	2.05049	-2.33564	-0.223607	-1.76084	0.292998	-0.396938	0.395177	NaN	-0.871345	-1.54533	-0.0523037	-1.74405	1.10361	1.94953	0.550009	-1.68345	-0.191375	-0.287586	-1.37563	0.207407	0.763459	1.89186	0.081864	-0.269099	1.92721	0.423374	1.0283	-1.58584	-0.216995	-0.323029	-1.11437	-0.324893	-0.0917913	-0.986508	-0.664734	-0.730648	-1.0497	0.414891	-0.708559	-1.53164	2.38346	1.72468	-1.89429	-0.479959	-0.995496	-0.325452
-17.1	1.89635	1.72339	-1.35164	1.47289	-1.06885	-0.223607	-1.42221	0.825721	-0.396938	-0.263451	NaN	-1.36926	-0.920952	0.993769	-0.504623	-0.770446	0.081717	-1.46222	-1.20383	0.902201	-1.34403	-0.706631	-1.17531	1.16179	0.25929	-0.970672	-0.510083	0.376581	-0.987872	-1.87204	-1.74055	0.402991	-2.20737	-1.01214	-0.324893	-0.321271	0.560955	-0.82491	-2.12976	-0.260451	-0.60414	-0.202445	-0.13924	2.38346	-1.16989	0.0585858	2.138	-1.82017	0.397774
-16.8	0.541814	0.534845	0.810983	0.895285	-2.01894	-0.223607	-1.08359	1.6248	0.73717	-0.922078	NaN	-1.7012	-0.296578	0.232989	-2.89495	-0.978675	0.315194	0.415861	0.0431653	0.355412	0.299325	-0.455756	-0.187654	-0.962622	1.69979	-0.152033	-0.510083	-0.509491	0	-1.01512	1.81791	-1.33297	0.349948	-0.194249	-0.324893	0.596646	1.72155	-0.34438	-3.37342	-1.52325	0.414891	1.3159	-0.13924	0.938938	0.0361823	0.0585858	0.392695	-2.1736	-0.687064
-16.5	2.57362	-0.950836	0.270327	-0.259921	-2.01894	-0.223607	-0.237036	-1.83789	-0.396938	1.38312	NaN	0.622389	1.57655	0.898671	-1.56699	0.478926	-1.08567	-0.657328	-2.7386	-0.191375	-0.404969	-0.957506	-0.582715	-0.0995817	-0.701044	-0.327456	-0.590411	-0.177214	-2.11687	-1.08104	-1.74055	-0.83698	-1.39979	-1.52332	-0.324893	0.826126	-0.986508	-0.664734	-1.81885	-1.52325	-0.0218365	0.430197	-0.13924	-0.264829	0.518609	0.0585858	0.392695	-2.64484	-1.7719
-16.2	1.44484	0.237709	-1.89229	1.47289	0.356284	-0.223607	-0.91428	-1.30517	-0.396938	4.01763	NaN	-0.705375	0.327797	-1.09838	-0.947276	-1.39513	0.081717	-1.99881	0.810548	-1.01156	-2.28309	-0.706631	-0.582715	-1.89205	-0.60501	-0.853724	-1.87566	-1.72784	-1.83462	-1.41062	-1.89527	-1.58096	-1.80358	-1.72779	-0.324893	0.367167	1.33469	0.616681	-0.730648	-1.0497	-1.62317	0.809782	-1.53164	-1.22784	1.24225	-1.11314	-1.35261	-1.93798	0.578581
-15.9	1.67059	2.91194	-1.35164	-0.259921	-2.96903	-0.223607	-1.42221	-1.03881	-0.396938	3.68831	NaN	-0.207463	-1.23314	-1.57386	-0.416093	1.7283	-0.15176	-2.66956	0.139088	0.0820179	0.181943	-1.04113	-0.385185	0.630683	1.41169	-0.152033	-0.911724	-0.177214	0.282249	-1.14695	-0.657542	-1.70496	-1.2652	0.0102236	-0.324893	1.28508	-0.212776	-0.82491	-1.81885	0.0552471	-0.60414	1.69548	-0.13924	2.86496	0.277395	0.839737	-1.35261	-2.52703	-0.687064
-15.6	3.25088	-0.6537	-1.35164	0.895285	-1.70225	-0.223607	-0.744969	1.09208	-1.53104	2.37106	NaN	-1.7012	1.88873	-2.04935	1.17745	1.7283	-1.08567	-2.26711	0.0431653	-0.191375	-1.34403	0.0459937	-1.96543	0.896234	0.643423	-1.08762	-1.07238	0.376581	0.141125	-0.553702	1.19905	-1.82896	-0.861411	-0.807664	-0.324893	1.05561	0.947821	0.937034	-1.35248	-1.68109	-1.33202	0.17714	-1.53164	2.38346	0.518609	2.01146	-1.35261	-2.29141	-0.506258
-15.3	3.25088	1.12912	-0.810982	2.6281	-0.910503	-0.223607	-0.91428	1.35844	-0.774972	0.395177	NaN	-2.53105	0.952171	-0.622888	-0.858745	2.97767	-1.08567	-0.120734	-2.64267	0.355412	-0.99188	-0.204881	1.78765	0.232357	1.31566	-1.49694	-0.670739	-0.0664553	1.129	-0.421868	0.580185	-2.57294	-0.996006	-0.705428	-0.324893	0.137687	1.33469	0.456504	-0.10882	1.31804	-1.76875	-0.455502	-1.53164	-0.0240753	1.72468	0.449162	1.26535	-1.70236	1.66342
-15	2.1221	0.534845	-1.89229	0.317681	-1.06885	-0.223607	-0.406347	1.09208	-0.396938	1.38312	NaN	-2.03314	-0.920952	-1.28857	0.026559	0.687155	-2.72001	1.3549	-0.532372	-0.191375	1.121	-0.873881	0.404938	-0.232357	0.0672232	-0.0935588	0.935822	0.819617	-0.423374	-0.685536	-0.193395	0.526988	-0.861411	1.54376	-0.324893	-0.55075	0.17409	-1.14526	-0.264277	-1.20755	1.5795	0.430197	-1.53164	-0.505582	-1.89353	-0.722564	-1.35261	-3.58732	-0.325452
-14.7	2.1221	0.831982	-1.35164	-0.837525	-0.910503	-0.223607	0.440209	1.09208	1.1152	0.0658627	NaN	-0.871345	0.639983	0.0427938	0.911863	0.270698	-2.25305	-3.3403	-0.532372	-1.55835	0.181943	-1.12476	0.00987662	0.697071	0.931523	1.01745	0.293198	0.819617	-1.55237	-0.224118	0.116037	-1.20897	-0.188433	-0.194249	-0.324893	-1.00971	1.72155	-0.34438	-0.575191	1.31804	-0.167412	1.18937	-1.53164	1.42045	-1.16989	-1.11314	-0.479959	-1.70236	-0.325452
-14.4	5.28269	-1.54511	0.810983	2.05049	-2.17729	-0.223607	-0.237036	-0.239725	-1.15301	0.724491	NaN	-0.373433	-1.23314	0.232989	1.62011	0.270698	-1.08567	-1.73052	-1.39568	0.628806	-0.287586	-0.0376313	-0.187654	-0.298745	-0.89311	-0.444404	-0.670739	0.0443035	0.705623	-0.81737	-1.58584	-1.58096	-0.323029	-0.39872	-0.324893	-1.23919	1.72155	0.616681	-0.419734	-1.20755	-0.458564	1.56895	-1.53164	0.938938	-0.687459	-1.50372	0.392695	-1.93798	0.759387
-14.1	1.44484	-0.0594267	-0.270328	0.895285	-0.752155	-0.223607	-1.59152	-1.03881	-1.15301	0.724491	NaN	-0.705375	-1.85751	-1.85916	-0.947276	1.93653	-2.01958	-1.46222	-1.77937	-1.28495	1.23838	-0.706631	-1.7679	-1.02901	-0.701044	0.491183	-1.31336	-0.62025	0.987872	-0.487785	-2.04999	-1.33297	-0.726816	0.725875	-0.324893	0.137687	-1.76024	0.13615	-0.730648	-0.891848	0.706043	1.44242	-1.53164	1.42045	0.759823	-0.331989	-0.479959	-0.0530146	-1.5911
-13.8	1.21908	0.237709	0.270327	2.05049	-2.65234	4.24853	-1.42221	2.15753	2.62735	1.38312	NaN	0.124478	0.327797	-2.52484	0.646272	0.270698	-2.72001	-0.254882	-0.244603	0.355412	-0.0528222	-0.455756	-0.780246	-1.02901	-0.124843	-0.795249	0.293198	-2.17088	0.282249	-0.751453	0.734901	1.89096	-1.2652	-0.807664	-0.324893	-0.321271	0.560955	-0.184203	-0.575191	-0.57615	-1.33202	2.20159	-1.53164	1.90195	0.277395	1.62089	-0.479959	-2.88046	-0.687064
-13.5	1.21908	-0.0594267	-0.270328	-1.99273	0.989678	-0.223607	-0.744969	-0.506087	-1.15301	-0.592765	NaN	1.95015	1.88873	-1.19347	1.26599	1.10361	-1.7861	-2.40126	-1.87529	-0.46477	-0.874498	0.213244	-1.7679	-0.298745	-0.124843	-0.561352	-0.269099	-0.952528	-0.705623	-1.27879	-0.812258	-2.69694	-0.188433	-0.807664	-0.324893	0.137687	1.72155	0.296327	-1.66339	-0.733999	2.45295	0.556725	-1.53164	-0.505582	0.277395	1.62089	1.26535	-0.288635	-1.04868
-13.2	1.21908	-0.0594267	-1.35164	0.895285	-1.2272	-0.223607	-0.91428	0.559359	1.87128	-0.922078	NaN	0.78836	-0.608766	-2.04935	-0.150502	0.895384	-2.01958	1.0866	-0.82014	1.99578	2.88174	0.965869	-0.780246	1.75927	0.0672232	1.42677	0.694838	1.48417	0.423374	0.237301	0.270753	1.51896	0.88833	1.44153	-0.324893	0.596646	0.947821	0.296327	-1.04156	0.0552471	1.28835	-0.708559	1.25316	0.216678	-0.687459	0.839737	-1.35261	-1.11331	0.216968
-12.9	3.92815	2.31766	-0.810982	2.6281	0.197935	-0.223607	-1.59152	0.0266363	1.49324	0.724491	NaN	1.45224	-0.608766	-1.57386	-0.239032	-1.81159	-2.25305	-1.86466	0.426857	-1.28495	1.82529	0.380494	-1.17531	0.43152	0.54739	0.608132	0.373526	-0.287973	0	-0.290034	-0.966974	-1.08497	-0.0538384	-0.194249	-0.324893	-0.55075	0.560955	-0.184203	-1.19702	-0.733999	-1.33202	0.683253	-1.53164	0.216678	-0.205032	1.62089	-1.35261	-2.1736	-0.867871
-12.6	0.767569	0.534845	-1.35164	0.895285	-1.06885	-0.223607	-0.237036	1.6248	4.51752	-0.592765	NaN	-0.539404	-0.296578	-1.66896	-0.858745	-0.14576	-2.25305	-1.32807	0.426857	-0.46477	0.299325	0.380494	-0.187654	-0.298745	-0.60501	0.958977	0.132541	0.265822	-0.846748	0.237301	-1.12169	-2.57294	-0.996006	-0.194249	-0.324893	-0.0917913	0.17409	0.776857	-1.66339	-1.52325	-1.62317	-0.0759168	-1.53164	-1.4686	-1.89353	0.449162	0.392695	-2.1736	0.216968
-12.3	0.316058	0.831982	0.270327	-0.837525	-1.38555	-0.223607	-1.08359	2.15753	3.00538	-1.58071	NaN	0.622389	-1.23314	-0.337596	1.00039	-0.353989	-1.7861	-1.19392	1.48201	-1.01156	1.23838	1.21674	-2.36049	-0.0995817	1.31566	0.842029	0.293198	-1.06329	-0.846748	-2.00387	0.580185	-1.70496	-1.1306	0.0102236	-0.324893	-0.321271	0.560955	-0.985087	-0.575191	-1.99679	0.560467	-0.0759168	-1.53164	-1.9501	-0.687459	0.449162	-0.479959	-1.23112	-1.7719
-12	0.541814	0.831982	-1.35164	0.317681	0.356284	-0.223607	-0.91428	-0.506087	-0.774972	-0.592765	NaN	1.1203	-0.296578	1.46926	-1.21287	2.14476	-2.72001	-3.47445	-1.10791	0.628806	-0.404969	0.714993	-1.7679	-1.36095	-0.31691	0.0233897	-0.911724	-1.17405	-0.564498	-2.00387	-2.2047	-4.0609	1.56131	-0.39872	-0.324893	1.05561	-1.37337	-0.184203	-0.886105	-0.891848	-0.312988	1.06284	-1.53164	-0.0240753	1.48346	-0.331989	-1.35261	-0.170825	-1.22948
-11.7	0.0903025	0.237709	-0.810982	-2.57034	-0.752155	-0.223607	-1.2529	-0.506087	0.359134	-0.263451	NaN	-0.705375	-0.608766	0.232989	0.557742	1.52007	-2.48653	-1.86466	0.52278	1.44899	0.181943	0.129619	-1.57037	-1.22817	-1.37328	-0.327456	-0.429755	-1.17405	-0.282249	-1.54246	0.116037	-0.0929977	-2.07277	-0.39872	-0.324893	0.137687	-0.986508	1.57774	-0.886105	-1.83894	-0.60414	0.17714	-0.13924	0.216678	0.0361823	1.23031	-0.479959	-0.406445	-0.867871
-11.4	1.44484	-0.6537	-0.270328	-0.259921	0.356284	-0.223607	-1.59152	0.559359	-0.774972	0.395177	NaN	-0.871345	-1.54533	-0.622888	0.646272	0.478926	-2.48653	1.3549	0.0431653	0.0820179	0.886236	1.55124	-0.582715	0.630683	-0.89311	0.140338	0.0522131	0.0443035	0.987872	0.698719	1.6632	-0.0929977	-1.2652	-0.296484	-0.324893	0.137687	-0.599642	0.937034	-1.81885	-0.733999	-1.33202	0.17714	-1.53164	-0.0240753	0.759823	0.839737	2.138	-1.58455	-0.144645
-11.1	0.316058	0.237709	-1.35164	-0.259921	0.197935	-0.223607	-0.406347	-0.506087	-0.396938	0.724491	NaN	-0.0414927	0.0156095	-0.147401	0.026559	1.31184	-2.25305	-1.59637	-1.20383	0.0820179	1.23838	1.46762	2.57778	-0.365133	-0.701044	0.315761	-0.108443	-0.0664553	-0.282249	-0.0922837	2.90092	-0.960978	0.753735	-1.31884	-0.324893	2.43248	-0.599642	0.616681	-2.90705	-0.733999	0.269316	0.0506112	-1.53164	-0.264829	-1.16989	-1.11314	0.392695	-1.46674	0.759387
-10.8	0.767569	-1.24797	0.270327	0.317681	-1.2272	-0.223607	0.778832	-2.10426	2.24931	-0.592765	NaN	1.61821	-0.608766	-1.95425	1.8857	0.0624687	-3.42044	-2.53541	-1.87529	-1.01156	-0.874498	0.464119	-1.37284	-0.497908	0.0672232	-0.152033	-0.0281147	-1.61708	-1.83462	-1.08104	-3.133	-0.712983	-1.2652	0.11246	-0.324893	1.28508	-1.76024	-0.0240267	-1.50793	-1.3654	-0.60414	-0.582031	-1.53164	0.457432	1.24225	-0.722564	-0.479959	-0.406445	-0.325452
-10.5	0.0903025	1.42625	-1.35164	-1.99273	-2.17729	-0.223607	2.64125	-0.239725	0.359134	0.724491	NaN	0.622389	-0.608766	-1.19347	0.026559	-0.14576	-1.31915	-1.05977	-0.916063	-0.191375	-1.57879	-1.45926	0.00987662	-1.69289	-0.989143	-1.14609	-0.349427	-0.841769	-1.27012	-0.949204	-1.74055	-0.464989	-2.74575	-0.9099	-0.324893	0.826126	0.947821	-0.0240267	-1.81885	-0.260451	1.28835	-0.202445	-1.53164	-1.22784	1.00104	-0.331989	-1.35261	0.536037	1.66342
-10.2	2.1221	-0.0594267	-1.35164	-0.837525	-1.2272	-0.223607	2.30263	-0.772449	-0.774972	1.38312	NaN	-0.539404	-0.608766	-1.19347	1.62011	-0.353989	-0.15176	-1.19392	1.38609	1.17559	-1.10926	-0.204881	-2.16296	-0.497908	0.0672232	-1.55541	-1.715	-1.72784	-1.27012	-0.553702	0.580185	-0.216995	-2.47656	-1.01214	-0.324893	1.97352	0.560955	1.25739	-1.81885	-0.891848	-0.749716	-1.46773	-1.53164	-1.4686	0.518609	-0.331989	0.392695	0.0647957	0.216968
-9.9	4.37966	-1.24797	-1.89229	-0.259921	-0.118761	-0.223607	2.64125	-2.10426	-0.774972	-0.592765	NaN	0.124478	3.44967	-0.432694	1.79717	0.478926	-0.15176	-0.925625	-1.77937	-0.738164	-0.874498	0.129619	-2.36049	-0.962622	-0.60501	-0.736775	-0.188771	-1.50632	-1.41125	-1.47654	-2.51413	-2.44894	-2.34196	-0.807664	-0.324893	1.97352	-0.212776	-1.30544	-0.575191	-1.20755	-0.895292	-0.0759168	-1.53164	-0.505582	-1.4111	-0.722564	1.26535	-0.995496	0.397774
-9.6	3.25088	-0.356563	-0.810982	3.2057	-3.28573	-0.223607	1.62539	-1.30517	-0.396938	1.0538	NaN	-1.36926	0.327797	-0.908181	-1.38993	-0.353989	-0.15176	-0.657328	-1.39568	1.72238	-0.0528222	-0.873881	-1.37284	-0.0995817	-0.989143	0.374235	0.935822	1.15189	-0.423374	-0.158201	0.270753	-1.58096	-1.2652	-1.31884	2.92404	0.596646	0.17409	-0.82491	-2.12976	-1.68109	0.414891	0.303668	-1.53164	-0.0240753	0.277395	0.839737	-0.479959	-0.0530146	-0.506258
-9.3	5.7342	0.534845	0.270327	-0.259921	-0.910503	-0.223607	0.101587	0.559359	-1.15301	1.71243	NaN	1.28627	0.952171	-1.00328	0.026559	0.270698	-1.31915	0.550009	0.0431653	-1.28495	-0.287586	-0.204881	-0.977777	-0.763459	-1.08518	-0.0350845	-0.108443	-0.841769	0.141125	0.435052	-0.193395	-0.83698	-1.1306	0.316931	-0.324893	1.74404	-1.37337	-0.34438	-0.730648	-0.733999	0.269316	-0.202445	-0.13924	-0.746335	0.759823	0.449162	0.392695	-0.877686	-0.687064
-9	2.57362	-0.6537	-0.270328	0.895285	2.41481	-0.223607	1.28676	0.559359	-0.774972	2.70037	NaN	2.61404	0.639983	-1.66896	0.11509	-0.978675	-2.01958	0.684157	-0.436449	0.355412	-0.404969	0.0459937	-1.57037	2.75509	-0.989143	1.07593	0.534182	0.0443035	0.564498	1.42381	-0.966974	-1.08497	-1.1306	0.316931	-0.324893	2.66196	-2.14711	0.616681	-2.12976	0.528795	1.43392	-0.455502	-1.53164	-0.264829	-0.928672	0.0585858	-0.479959	-0.524255	0.940194
-8.7	0.993325	-0.0594267	0.270327	2.05049	1.30637	-0.223607	1.62539	2.42389	-0.018902	1.38312	NaN	3.60986	3.76186	-0.432694	-1.92111	-0.562217	-2.01958	-0.925625	0.330934	-2.37853	-1.57879	-1.45926	0.602469	0.165969	0.0672232	-0.619827	-0.992052	0.376581	-0.705623	0.369135	-0.348111	1.02298	-1.1306	-1.01214	-0.324893	1.05561	-1.76024	-0.184203	-1.35248	0.0552471	0.560467	-0.835087	-1.53164	-0.0240753	0.0361823	0.449162	3.01065	-0.995496	0.216968
-8.4	1.89635	2.31766	-1.35164	0.895285	1.30637	-0.223607	-0.575658	-0.239725	0.73717	0.0658627	NaN	2.11612	2.51311	-1.28857	-1.38993	-0.770446	-1.55262	-1.32807	-1.4916	-0.191375	-0.639734	-0.623006	-0.385185	-0.232357	1.02756	-0.502878	1.09648	-0.841769	-1.41125	-0.355951	-0.966974	-2.32495	-1.1306	-0.9099	-0.324893	0.596646	0.560955	-0.82491	-1.81885	-0.260451	-1.62317	-0.961616	-1.53164	-0.746335	-0.446245	0.839737	-1.35261	-2.40922	0.578581
-8.1	0.0903025	1.12912	-0.270328	0.895285	2.25647	-0.223607	-0.575658	0.0266363	-1.15301	-0.922078	NaN	-0.705375	1.57655	-1.76406	2.06276	-0.978675	-0.385238	1.48905	-0.340526	-1.01156	-1.93094	-0.706631	-1.96543	0.298745	-0.508977	-0.38593	0.534182	-0.952528	-0.564498	-0.685536	-1.74055	-0.0929977	-0.457625	0.11246	-0.324893	0.367167	-0.599642	-0.985087	-0.886105	-0.891848	-0.312988	-0.0759168	-0.13924	0.457432	0.0361823	-0.722564	-0.479959	-1.46674	-0.144645
-7.8	2.57362	-0.356563	-1.35164	3.7833	1.30637	-0.223607	-1.08359	0.825721	-0.018902	-2.23933	NaN	-0.207463	-1.23314	-1.19347	2.85953	-0.353989	0.081717	1.3549	0.139088	1.99578	-0.404969	-1.04113	1.78765	-0.564296	-0.124843	-0.561352	-0.831395	-0.841769	0.423374	0.435052	-0.0386789	0.0309991	-0.323029	1.03258	2.92404	0.826126	-0.599642	0.616681	-1.19702	-0.260451	-0.895292	1.3159	-0.13924	-1.9501	0.277395	-0.331989	-1.35261	0.300416	0.759387
-7.5	1.44484	-1.84224	-0.270328	0.317681	-2.65234	-0.223607	-1.59152	-1.30517	-0.774972	-0.592765	NaN	-0.207463	-1.54533	0.708476	1.79717	-0.978675	-0.385238	2.15979	-0.0527576	-0.191375	1.35577	0.464119	-0.187654	1.69289	1.12359	1.66067	1.17681	0.155063	0.141125	1.55564	1.35376	2.13895	3.04186	3.28177	-0.324893	0.137687	-0.599642	-1.62579	-1.9743	0.528795	-0.312988	-1.08814	-0.13924	-0.505582	0.277395	-0.331989	0.392695	-1.34893	-1.04868
-7.2	1.21908	0.237709	-0.810982	2.05049	1.78142	-0.223607	-0.575658	-0.506087	-0.018902	-1.91002	NaN	-0.373433	0.639983	1.27906	1.53158	0.270698	0.081717	-1.46222	1.29016	0.0820179	0.886236	0.296869	-0.780246	0.564296	0.25929	0.842029	-0.108443	0.376581	-0.282249	1.55564	0.580185	-1.08497	0.215353	2.15718	-0.324893	-0.321271	0.17409	-0.985087	-0.264277	1.16019	-1.33202	0.17714	-1.53164	-1.22784	-0.928672	-1.11314	0.392695	1.83195	-0.325452
-6.9	0.767569	-1.24797	-1.89229	2.05049	-2.01894	-0.223607	0.440209	0.292998	0.73717	-0.263451	NaN	-0.539404	0.0156095	0.232989	2.41688	1.31184	-0.385238	2.15979	-0.436449	-1.28495	-0.0528222	-0.790256	-0.977777	0.630683	-0.60501	-0.678301	0.534182	-0.509491	0.987872	0.369135	1.04433	0.650985	0.215353	0.62364	-0.324893	1.05561	0.17409	1.25739	-0.575191	-1.68109	0.12374	1.18937	6.82276	0.216678	0.759823	2.01146	0.392695	0.771657	-1.04868
-6.6	1.44484	-0.356563	-0.270328	-0.259921	-0.593807	-0.223607	0.948142	-2.37062	-0.396938	0.0658627	NaN	-0.705375	-0.608766	-0.0523037	0.469211	-1.1869	0.081717	-1.32807	-1.01199	-0.738164	-0.639734	-1.20838	0.207407	-0.0995817	-0.797077	-0.268981	-0.0281147	0.0443035	1.41125	1.22605	-1.27641	1.64296	-0.457625	-0.603192	-0.324893	0.367167	-0.212776	0.937034	-0.10882	-1.3654	-0.895292	0.17714	-1.53164	-1.70935	0.0361823	1.23031	2.138	0.300416	0.578581
-6.3	3.92815	0.237709	-1.35164	3.7833	0.672981	-0.223607	0.778832	2.15753	-0.774972	-0.922078	NaN	-0.0414927	2.51311	0.898671	0.292151	-0.353989	-0.15176	0.818306	-1.4916	1.17559	-2.63523	-2.46276	-0.187654	-0.763459	-0.989143	-1.20457	-1.715	-1.72784	-0.846748	0.698719	0.425469	-1.58096	-1.66898	-0.9099	-0.324893	1.28508	-0.212776	-0.82491	0.668465	-1.52325	-0.0218365	-0.0759168	-1.53164	-0.505582	1.24225	-0.722564	1.26535	0.653847	-0.144645
-6	0.993325	-1.24797	0.810983	0.895285	-0.27711	-0.223607	0.270898	1.35844	-0.774972	-0.592765	NaN	0.456419	0.327797	0.423184	1.08892	0.478926	-1.31915	-0.657328	-0.340526	-1.83174	-0.757116	-1.54288	-0.977777	0.232357	2.85219	-0.152033	-0.429755	-0.73101	-0.564498	-0.0922837	-2.2047	-0.0929977	-0.323029	-0.705428	-0.324893	0.367167	0.947821	1.09721	0.0466373	0.0552471	2.30738	0.556725	2.64556	-1.22784	0.277395	2.01146	-1.35261	0.418226	0.578581
-5.7	-0.812721	-0.0594267	0.270327	-0.259921	0.672981	-0.223607	-0.406347	-0.506087	-0.018902	0.0658627	NaN	-0.0414927	-0.920952	1.08887	0.11509	2.35298	0.315194	0.818306	0.714625	-0.738164	0.0645602	0.0459937	1.19506	1.16179	0.739457	-0.736775	0.293198	0.265822	0.705623	-0.553702	0.270753	-0.83698	-0.726816	0.214696	-0.324893	0.367167	2.10842	-0.34438	0.668465	-0.260451	-0.312988	-1.08814	-0.13924	1.17969	-0.205032	0.839737	1.26535	0.418226	0.759387
-5.4	2.1221	-0.950836	-0.810982	1.47289	-1.2272	-0.223607	-0.575658	0.559359	-0.018902	-1.25139	NaN	-1.36926	-0.920952	-0.908181	0.646272	0.895384	-2.01958	1.6232	-0.340526	-1.01156	0.299325	-0.623006	0.602469	0.829846	-0.0288099	0.374235	0.453854	1.59493	-0.282249	1.81931	-0.0386789	1.39497	1.15752	-0.194249	-0.324893	-0.55075	0.560955	0.456504	-1.19702	-0.733999	-0.312988	-1.59426	-1.53164	0.938938	-0.928672	0.0585858	-1.35261	1.94976	-0.144645
-5.1	0.993325	1.42625	0.270327	-0.837525	0.197935	-0.223607	-0.0677243	0.825721	1.1152	-0.263451	NaN	0.290449	1.57655	-0.813083	-1.3014	-0.978675	1.2491	-0.657328	-0.82014	0.0820179	0.651472	0.798618	0.602469	2.09121	0.83549	1.19287	1.25713	1.04113	0.423374	1.95114	1.35376	0.526988	1.29212	1.13482	-0.324893	-0.321271	-0.212776	0.296327	-1.66339	-0.102602	-0.0218365	-0.455502	-1.53164	-0.987089	1.48346	-0.331989	0.392695	1.12509	0.0361614
-4.8	0.316058	1.12912	0.810983	-0.837525	-0.27711	-0.223607	0.440209	0.0266363	-0.018902	0.0658627	NaN	-1.03732	-1.54533	-1.19347	1.08892	-0.14576	-1.08567	-0.52318	-0.532372	0.628806	-1.93094	-0.957506	-1.37284	-2.35676	-0.989143	-1.43847	-1.15271	-0.952528	-0.564498	-0.685536	-0.348111	0.774982	-1.1306	-1.31884	2.92404	-0.78023	0.560955	-0.34438	0.202094	-0.102602	0.12374	0.556725	-0.13924	-0.264829	-1.16989	-1.11314	-1.35261	-0.288635	-1.5911
-4.5	-0.812721	-0.6537	0.810983	-1.41513	-1.06885	-0.223607	1.11745	-0.239725	-1.15301	1.71243	NaN	1.78418	-0.608766	0.423184	-1.38993	1.7283	-0.618714	0.147563	-0.436449	-0.738164	-0.639734	-0.957506	1.59012	-0.564296	-1.27724	-1.20457	-0.992052	-0.841769	0.564498	-0.290034	-1.27641	-1.20897	-2.07277	-0.705428	-0.324893	0.137687	0.560955	-0.34438	-1.35248	-0.418301	0.560467	0.303668	-0.13924	-0.746335	0.0361823	0.449162	0.392695	1.47852	-0.144645
-4.2	0.316058	-1.54511	0.810983	0.317681	0.0395869	-0.223607	2.30263	-1.57153	0.73717	0.395177	NaN	-0.0414927	0.639983	-0.242498	0.380681	0.270698	-0.618714	-0.389031	-0.340526	-0.738164	-0.874498	-1.37563	0.00987662	-0.43152	-0.60501	-0.619827	-0.670739	0.708858	0.141125	-0.355951	0.734901	-0.712983	-0.323029	-1.31884	-0.324893	-0.78023	-0.212776	-1.30544	0.202094	-0.57615	-1.62317	0.17714	-1.53164	-0.505582	-0.928672	0.0585858	2.138	0.418226	-1.7719
-3.9	-1.26423	-0.950836	-1.35164	-0.837525	0.356284	-0.223607	-0.406347	-1.03881	1.1152	-0.922078	NaN	-1.36926	-2.48189	-1.28857	0.734802	0.0624687	0.315194	1.75735	-1.68345	-0.738164	-1.34403	-0.539381	-0.385185	-0.298745	-1.85344	-0.853724	-2.43796	-1.17405	-1.27012	-0.0922837	-0.348111	-1.08497	-0.59222	-1.01214	-0.324893	-1.69815	-0.599642	1.41756	0.202094	0.0552471	-0.167412	0.0506112	-0.13924	2.86496	0.0361823	0.449162	0.392695	-0.0530146	0.940194
-3.6	0.0903025	-0.356563	0.810983	0.317681	1.30637	-0.223607	-0.744969	-0.239725	0.73717	0.0658627	NaN	-1.20329	0.639983	-1.47877	-0.504623	0.0624687	-0.15176	0.952455	0.52278	0.628806	-1.22665	-1.04113	-1.7679	-0.165969	0.643423	-0.38593	0.453854	-0.73101	-0.987872	-0.553702	-0.812258	0.0309991	-0.457625	-0.9099	-0.324893	-1.23919	0.17409	-0.0240267	0.357551	0.686644	0.560467	-0.328974	-0.13924	0.457432	1.00104	-1.50372	-0.479959	0.0647957	0.940194
-3.3	-1.48999	1.12912	-0.810982	-0.259921	-0.435458	-0.223607	-0.575658	-0.772449	-0.396938	0.0658627	NaN	0.622389	-0.920952	-1.76406	-0.0619715	-1.1869	-1.08567	0.684157	-1.77937	1.99578	0.299325	0.296869	-0.977777	1.02901	-0.124843	-1.02915	0.0522131	-0.0664553	-2.25799	-1.54246	0.270753	-1.70496	-0.0538384	0.828111	-0.324893	-0.78023	-0.212776	1.57774	2.68941	2.10729	-1.33202	2.70771	1.25316	0.216678	0.277395	2.01146	-0.479959	1.2429	0.940194
-3	1.89635	1.42625	-0.270328	0.317681	1.78142	-0.223607	-1.08359	0.559359	-1.15301	-0.263451	NaN	0.124478	0.327797	-1.09838	0.557742	0.0624687	0.081717	0.550009	1.00239	1.44899	0.886236	0.547744	-0.385185	0.630683	0.355324	0.432709	0.293198	-0.509491	1.27012	1.48972	1.81791	0.774982	1.02293	2.25941	-0.324893	-1.00971	-1.37337	-0.504557	0.823922	2.10729	-0.749716	-0.582031	-0.13924	0.216678	-0.687459	0.449162	-0.479959	-1.46674	2.02503
-2.7	0.0903025	0.534845	-0.810982	2.05049	1.78142	-0.223607	-0.0677243	-1.03881	-1.53104	-0.922078	NaN	1.45224	0.0156095	0.518281	-0.0619715	0.687155	-0.385238	-0.120734	0.810548	0.0820179	1.59053	1.30037	-0.977777	0.0995816	-0.797077	2.59626	1.98009	2.25948	-0.141125	0.435052	2.12734	1.14697	1.42671	1.13482	-0.324893	1.28508	-1.37337	-0.34438	-0.264277	0.370946	-0.0218365	-0.961616	-0.13924	0.216678	0.759823	-0.331989	0.392695	-0.0530146	-1.22948
-2.4	-0.135453	-0.356563	-1.35164	-0.837525	0.989678	-0.223607	-1.08359	0.825721	0.359134	-0.592765	NaN	-1.03732	0.952171	0.613379	-0.327563	-0.770446	0.315194	0.013415	1.48201	1.44899	1.121	0.631368	0.207407	-0.43152	0.451357	1.1344	0.935822	1.70569	-0.423374	0.698719	0.116037	0.774982	1.96509	1.44153	-0.324893	0.137687	-0.599642	0.456504	-0.10882	0.844494	1.14277	-0.328974	-0.13924	-0.505582	2.68953	-1.50372	-1.35261	-0.642066	-0.506258
-2.1	-0.812721	0.237709	0.270327	-0.259921	0.831329	-0.223607	-0.575658	1.09208	-1.15301	0.0658627	NaN	1.61821	-0.608766	0.898671	0.20362	-0.770446	1.71606	0.415861	0.52278	-0.46477	0.416707	-0.288506	1.39259	0.0995816	-0.124843	1.1344	-0.349427	-0.62025	0.423374	0.171384	-0.812258	0.154996	0.753735	0.214696	-0.324893	-0.0917913	0.947821	-0.0240267	-0.419734	-0.260451	-0.60414	-0.582031	1.25316	-0.264829	0.759823	-0.722564	0.392695	-1.34893	0.759387
-1.8	-0.135453	-0.356563	-0.810982	0.317681	0.197935	-0.223607	-0.744969	0.0266363	-0.018902	-0.922078	NaN	-0.705375	0.639983	0.518281	1.17745	-0.353989	1.94953	-0.120734	1.00239	0.355412	1.35577	0.714993	0.799999	0.165969	-1.18121	0.432709	-0.188771	-0.398733	-0.282249	-0.355951	-0.0386789	2.13895	0.0807572	-0.0920125	-0.324893	1.05561	-0.599642	-1.30544	-0.575191	-0.733999	0.269316	-0.202445	-0.13924	-1.22784	-0.687459	-1.11314	1.26535	-0.995496	-0.687064
-1.5	0.993325	-0.950836	2.43295	1.47289	-1.38555	-0.223607	-1.59152	-1.03881	-0.774972	-0.592765	NaN	-0.539404	0.952171	1.37416	-1.38993	-1.81159	0.315194	-0.254882	1.96162	1.17559	1.35577	2.38749	0.00987662	1.29456	0.163257	0.72508	0.212869	-0.73101	1.41125	0.962387	0.116037	0.526988	-0.323029	-0.500956	-0.324893	0.596646	-0.599642	-2.58686	0.202094	-2.15464	2.01623	0.93631	-0.13924	-0.746335	-0.446245	0.0585858	-0.479959	0.536037	-0.867871
-1.2	-0.135453	1.42625	-0.810982	-0.259921	-0.752155	-0.223607	0.440209	2.15753	2.62735	-0.922078	NaN	-0.705375	0.0156095	1.27906	-2.09817	-0.978675	-0.15176	0.550009	-1.10791	0.355412	0.181943	0.296869	0.00987662	-0.564296	0.0672232	-0.327456	1.33746	-0.177214	-0.564498	0.237301	-0.0386789	-0.340992	-0.59222	-0.500956	2.92404	1.28508	-0.212776	1.25739	1.60121	-0.891848	-1.33202	0.556725	1.25316	-0.505582	-0.928672	-0.331989	0.392695	-0.170825	0.397774
-0.9	-1.03848	0.534845	0.810983	-1.99273	-0.752155	-0.223607	1.7947	0.292998	-0.018902	0.724491	NaN	1.28627	0.639983	0.232989	-1.03581	-0.353989	0.315194	-0.925625	-0.244603	-0.738164	-0.404969	-0.372131	1.59012	-1.02901	0.54739	-0.0935588	-0.751067	-0.287973	2.25799	-0.421868	0.116037	-0.712983	0.215353	0.419167	-0.324893	2.43248	-0.986508	-0.0240267	-0.264277	1.00234	-0.167412	-0.0759168	-0.13924	-0.264829	-0.205032	-0.331989	-0.479959	-1.70236	-0.867871
-0.6	-0.361209	-1.24797	0.270327	0.317681	-1.5439	-0.223607	0.440209	-1.57153	0.73717	2.70037	NaN	0.124478	0.952171	0.613379	1.08892	-0.14576	-0.15176	-1.32807	0.235011	-0.191375	-0.0528222	-0.455756	-0.977777	-0.962622	0.25929	-0.561352	-0.670739	0.598099	-0.141125	-1.41062	-0.657542	-1.08497	-0.996006	0.62364	-0.324893	0.137687	2.10842	-0.0240267	-0.10882	-0.733999	0.12374	1.56895	-0.13924	1.42045	-1.4111	1.23031	-0.479959	0.0647957	-0.506258
-0.3	-0.812721	0.831982	-1.35164	0.317681	-0.435458	4.24853	1.11745	0.292998	-0.396938	1.38312	NaN	0.290449	0.327797	0.803573	1.08892	0.895384	1.01563	-2.53541	-0.628295	-1.01156	-0.99188	1.13312	-0.187654	-0.829847	0.0672232	-0.619827	0.373526	-0.952528	0.282249	-1.41062	-0.348111	-0.464989	-0.323029	-1.01214	-0.324893	-0.55075	-0.986508	0.616681	-1.04156	-0.260451	-0.458564	-1.21467	-0.13924	-0.264829	0.277395	-0.331989	1.26535	-0.995496	0.940194
0	4.83117	-1.24797	-1.35164	9.55934	-0.910503	-0.223607	-0.237036	-0.239725	-0.018902	7.31076	NaN	0.78836	-1.85751	-0.622888	6.22369	11.9315	-2.48653	-2.93785	-1.4916	0.902201	5.81629	2.80562	-1.57037	2.95425	2.37202	3.82421	1.98009	1.59493	1.55237	-0.0263667	0.425469	-0.588986	2.50348	3.48625	-0.324893	-1.69815	2.10842	2.21845	3.62215	-0.57615	-2.35105	2.58118	2.64556	-1.9501	2.44832	-0.331989	-1.35261	-1.11331	-0.144645
0.3	9.57204	-1.54511	-0.810982	8.98174	2.57316	-0.223607	-1.42221	0.559359	-1.53104	-2.56865	NaN	-2.36508	-3.10626	-0.527791	1.62011	5.47642	-2.48653	-2.93785	-2.16306	-0.738164	1.35577	-0.288506	-2.16296	1.0954	1.79582	1.60219	0.534182	0.0443035	-1.129	-0.619619	-1.12169	-2.69694	-0.457625	0.11246	-0.324893	-3.53398	1.72155	0.937034	6.42037	-0.418301	-2.0599	-0.202445	1.25316	-4.11688	0.518609	-2.28487	0.392695	-0.406445	0.397774
0.6	6.41146	-1.84224	-1.35164	3.7833	2.88986	-0.223607	-1.76084	-0.772449	-1.53104	-1.58071	NaN	-2.86299	-3.73064	-0.147401	-0.770215	0.478926	-2.25305	-0.791476	-0.916063	0.902201	2.06006	0.965869	-0.780246	0.763459	0.83549	1.95304	1.33746	1.26265	-1.41125	-1.34471	0.425469	1.39497	1.02293	2.05494	-0.324893	-2.84554	0.560955	-0.34438	5.17672	-1.3654	-2.93335	0.17714	-0.13924	-3.15387	-0.446245	-1.89429	1.26535	-2.88046	0.578581
0.9	7.31449	0.534845	-1.35164	5.51611	0.831329	-0.223607	-1.59152	1.09208	0.359134	1.0538	NaN	-2.53105	-2.79408	-1.28857	0.380681	0.0624687	0.315194	-1.59637	-1.01199	-1.28495	-0.0528222	-0.121256	-1.37284	0.630683	0.25929	0.257287	-0.510083	-0.177214	-0.846748	-1.01512	-0.348111	-2.44894	0.88833	0.11246	2.92404	-2.15711	0.17409	-1.30544	6.26492	-0.260451	-2.49663	0.556725	2.64556	-2.43161	-0.928672	-1.11314	-0.479959	-1.23112	-0.506258
1.2	6.86298	-0.0594267	-0.270328	4.93851	-1.5439	-0.223607	-1.42221	0.292998	-0.774972	1.71243	NaN	-1.86717	-3.73064	-1.09838	0.292151	-3.06096	-0.15176	-3.47445	-1.39568	0.628806	1.23838	1.30037	0.00987662	-0.497908	0.643423	0.608132	-0.510083	-0.398733	0.705623	-1.01512	0.580185	-3.68891	0.88833	2.46389	-0.324893	-1.69815	-1.37337	-0.82491	3.15578	-0.260451	-0.895292	0.809782	-0.13924	-2.19086	-0.446245	0.839737	-1.35261	-0.524255	-0.506258
1.5	8.21751	-0.0594267	-1.35164	4.36091	-0.27711	-0.223607	-1.2529	0.292998	2.24931	2.04175	NaN	-1.20329	-1.54533	-1.19347	-0.239032	-2.43628	0.081717	0.281712	0.235011	1.99578	1.23838	0.464119	-2.55802	0.298745	2.37202	1.3683	0.694838	0.598099	-0.141125	0.764636	0.425469	0.402991	1.8305	1.13482	-0.324893	-0.321271	-0.986508	-0.664734	3.15578	-0.891848	-1.91432	0.303668	-0.13924	-1.22784	1.72468	0.839737	2.138	-0.877686	1.66342
1.8	8.21751	-0.356563	0.810983	2.05049	0.197935	-0.223607	-0.575658	2.69025	-0.774972	1.0538	NaN	-0.207463	-1.85751	-1.09838	-1.74405	-0.978675	1.94953	-0.52318	0.426857	0.0820179	0.886236	0.296869	0.00987662	1.29456	-0.220877	0.958977	-0.269099	-0.398733	0.564498	0.105467	0.270753	-0.83698	2.09969	1.74824	-0.324893	-1.46867	0.947821	1.09721	3.62215	-0.57615	-2.20548	0.430197	-0.13924	-2.43161	-0.446245	-0.722564	-1.35261	-0.759876	0.940194
2.1	7.31449	-0.356563	-0.270328	1.47289	-0.910503	-0.223607	-0.744969	1.35844	-1.53104	1.38312	NaN	-1.36926	-1.23314	0.0427938	-0.416093	-1.39513	-0.15176	-0.925625	-0.724217	3.36275	5.58153	2.05299	-1.37284	0.497908	-0.508977	1.83609	1.09648	1.37341	-0.141125	-0.883287	0.116037	-2.07695	3.17645	4.71308	-0.324893	-0.0917913	0.17409	-0.184203	2.84486	0.370946	-0.749716	-1.21467	2.64556	-2.19086	0.518609	-1.11314	-1.35261	-0.995496	-0.867871
2.4	9.12053	-2.43652	-1.35164	4.36091	0.0395869	-0.223607	-1.59152	0.292998	-0.018902	1.0538	NaN	-1.86717	-1.23314	-0.242498	0.380681	-2.01982	2.41649	2.02564	1.00239	1.44899	4.64247	0.714993	0.602469	-0.298745	2.37202	1.1344	1.17681	-1.72784	0.846748	1.09422	2.12734	2.26295	3.04186	5.32649	-0.324893	-0.78023	-0.212776	-0.82491	2.22304	-0.733999	-1.18644	0.809782	5.43036	-2.67236	1.00104	-0.722564	-0.479959	-2.52703	-0.687064
2.7	8.89478	-1.24797	-0.810982	2.6281	0.356284	-0.223607	-1.59152	-1.83789	1.1152	-0.922078	NaN	-1.86717	0.327797	-1.38367	1.17745	-2.85273	1.01563	-0.791476	0.139088	1.17559	0.768854	0.380494	-0.582715	1.16179	0.739457	0.783555	0.132541	-0.0664553	1.27012	0.566886	1.97263	0.0309991	1.42671	2.56612	-0.324893	-0.78023	-0.212776	-1.78597	1.75666	-1.68109	-1.04087	-0.708559	-0.13924	-1.9501	0.277395	1.62089	-0.479959	-2.1736	0.940194
3	11.1523	0.237709	-0.810982	-0.259921	-1.2272	-0.223607	-1.76084	0.825721	-0.396938	-0.263451	NaN	-2.03314	-0.608766	-2.04935	-1.47846	-1.60336	2.41649	-0.52318	0.810548	-1.01156	0.651472	0.798618	0.207407	-0.232357	-0.220877	1.54372	-0.670739	-0.73101	0.564498	0.632802	2.12734	0.0309991	1.6959	1.33929	-0.324893	1.28508	-0.599642	-0.34438	2.22304	-0.260451	-1.76875	0.430197	-0.13924	-1.22784	-0.928672	2.79261	-1.35261	-1.70236	-0.867871
3.3	8.89478	0.237709	-0.270328	0.895285	-0.593807	-0.223607	-0.744969	0.559359	-0.774972	1.0538	NaN	-1.86717	-0.296578	-2.42974	-0.416093	-2.85273	3.81735	-1.59637	-0.916063	0.355412	-0.757116	-0.706631	-1.37284	0.43152	1.02756	-0.502878	0.935822	-0.398733	-0.282249	-0.355951	-0.193395	-2.69694	-1.39979	-1.11437	2.92404	0.137687	1.33469	-0.664734	0.357551	-1.52325	-0.458564	-0.0759168	1.25316	-2.67236	-0.205032	0.0585858	-1.35261	-1.58455	0.759387
3.6	8.66902	0.534845	0.270327	2.05049	-0.118761	-0.223607	-0.91428	3.22297	0.73717	-0.592765	NaN	-1.36926	-0.608766	-1.95425	-1.47846	-3.68565	6.3856	2.42809	-0.916063	-0.738164	0.299325	1.21674	0.602469	-1.36095	2.27599	0.783555	-0.108443	-0.509491	0.846748	-1.60837	-1.12169	-0.340992	-1.66898	0.828111	-0.324893	-0.55075	0.17409	-1.30544	-0.575191	-0.418301	-0.60414	0.430197	2.64556	-2.19086	0.518609	0.449162	-0.479959	-0.406445	0.578581
3.9	7.31449	1.12912	-0.270328	2.6281	1.14803	-0.223607	-0.744969	2.42389	0.73717	-1.25139	NaN	-2.03314	-1.54533	-2.33464	-1.21287	-1.81159	6.3856	-2.40126	-1.97121	-1.83174	-0.287586	1.04949	-2.16296	-0.43152	1.21962	0.315761	1.57845	-1.06329	-0.987872	-0.81737	-2.51413	-2.20095	-0.323029	-0.39872	-0.324893	-1.00971	1.72155	-0.664734	-2.12976	-2.15464	-1.91432	-0.0759168	-0.13924	-2.43161	0.518609	0.449162	-0.479959	0.536037	0.940194
4.2	6.41146	-0.6537	-0.270328	2.6281	-2.65234	-0.223607	-0.91428	1.09208	2.24931	-1.91002	NaN	-1.03732	1.26436	-2.14445	-2.54082	-2.01982	8.95385	1.22075	-0.82014	1.17559	1.70791	-0.790256	0.404938	0.896234	1.89186	0.608132	-1.47402	-0.73101	0.141125	-0.0263667	-0.657542	0.278993	1.42671	0.828111	-0.324893	0.137687	0.560955	-0.0240267	-3.0625	-0.891848	-2.6422	1.18937	-1.53164	-3.15387	-0.205032	-0.331989	-1.35261	0.418226	0.216968
4.5	7.08873	1.12912	-1.35164	0.895285	-2.81069	-0.223607	-1.2529	0.559359	-0.774972	-0.922078	NaN	-2.36508	-0.608766	-1.28857	-1.83258	-2.85273	4.98474	1.6232	-0.340526	-0.191375	0.416707	-0.623006	0.00987662	0.0331938	-1.37328	0.140338	1.41779	-1.50632	-0.564498	1.35789	1.81791	-0.712983	2.09969	3.58848	-0.324893	-1.46867	0.947821	-0.504557	-3.83979	-1.0497	-1.18644	-0.582031	-0.13924	-1.4686	-1.16989	-1.11314	-0.479959	-1.23112	-0.687064
4.8	8.21751	0.237709	1.35164	3.7833	-2.49399	-0.223607	-1.2529	2.95661	4.51752	-1.25139	NaN	-1.03732	0.327797	-1.95425	-2.45229	-1.39513	3.58387	-1.73052	0.906471	-0.46477	2.06006	0.0459937	1.78765	0.896234	0.451357	2.18694	0.694838	0.48734	-0.423374	-1.21287	1.81791	0.278993	2.36888	4.81531	-0.324893	0.137687	2.49528	-1.14526	-3.0625	-1.3654	-1.4776	-0.961616	-0.13924	-0.505582	0.0361823	-1.50372	0.392695	-1.70236	-1.04868
5.1	7.99175	0.534845	1.35164	2.6281	-2.33564	4.24853	-1.42221	0.825721	3.76145	-1.58071	NaN	-0.373433	0.327797	-0.908181	2.771	-1.39513	1.48258	2.83053	-1.10791	1.44899	1.47315	0.0459937	-0.187654	1.16179	0.355324	1.48525	-0.0281147	1.37341	-1.129	0.764636	0.425469	1.02298	2.09969	3.0773	-0.324893	0.367167	-0.599642	-0.985087	-3.21796	-0.891848	-0.458564	0.303668	1.25316	-0.746335	-0.687459	0.0585858	1.26535	-1.23112	-0.325452
5.4	9.57204	2.02053	0.270327	-3.14794	-1.38555	-0.223607	-1.2529	2.95661	1.1152	-1.91002	NaN	1.1203	-1.54533	-1.66896	-0.150502	-1.39513	4.2843	-1.99881	-1.68345	1.17559	2.29482	-0.455756	-0.977777	0.43152	1.50772	1.30982	0.212869	-0.177214	-0.282249	-0.685536	-2.2047	-1.45697	2.50348	1.74824	-0.324893	-0.0917913	-0.212776	-0.0240267	-3.68433	-1.0497	-1.04087	0.556725	1.25316	-0.746335	1.48346	0.839737	-1.35261	-1.70236	-0.867871
5.7	7.54024	-0.6537	-0.810982	4.36091	-0.910503	-0.223607	-1.42221	1.35844	-0.774972	-0.922078	NaN	-0.539404	0.327797	-1.47877	-1.56699	-2.01982	7.08603	-0.925625	-0.244603	0.0820179	2.88174	0.129619	0.602469	-0.763459	0.83549	1.01745	-0.670739	1.48417	-0.987872	0.764636	-0.812258	-3.93691	2.23429	2.66836	-0.324893	0.826126	-0.599642	-0.985087	-2.90705	-0.891848	-0.0218365	-0.202445	-0.13924	-0.746335	-0.205032	-1.50372	-1.35261	-1.93798	-1.41029
6	5.7342	-0.356563	0.270327	-0.259921	0.356284	4.24853	-0.91428	0.825721	0.73717	-1.25139	NaN	-1.36926	-1.23314	0.0427938	-1.56699	-1.81159	6.15212	0.818306	0.330934	1.44899	2.41221	0.129619	0.799999	0.564296	1.21962	0.842029	-0.831395	-0.62025	-0.564498	-0.81737	-0.657542	0.154996	2.36888	1.03258	-0.324893	-0.321271	-0.212776	-0.985087	-1.9743	-1.3654	-0.749716	-0.708559	1.25316	-0.264829	1.00104	-2.28487	-0.479959	-0.995496	-1.04868
6.3	8.21751	-0.950836	0.810983	0.895285	-0.910503	-0.223607	0.101587	1.89117	1.1152	0.724491	NaN	-0.705375	1.57655	0.0427938	-0.504623	-3.06096	5.68517	-2.53541	-0.532372	0.902201	0.416707	-0.623006	-0.385185	-0.896234	0.451357	0.432709	-0.269099	-1.39556	-0.282249	-0.224118	-1.27641	-1.95295	-1.2652	1.646	-0.324893	1.51456	0.947821	-0.664734	-2.75159	-0.891848	-2.49663	-0.0759168	-0.13924	-0.746335	-0.205032	-0.331989	0.392695	-1.82017	0.216968
6.6	7.31449	-0.356563	0.810983	1.47289	-1.5439	-0.223607	-1.2529	0.292998	-0.018902	0.0658627	NaN	-1.86717	1.26436	-0.147401	-0.681684	-1.39513	8.72037	0.550009	-1.39568	0.628806	-0.522351	-0.0376313	-1.7679	0.365132	0.0672232	0.081864	-0.188771	1.59493	-1.129	-0.81737	-0.966974	-2.82093	-0.996006	1.646	-0.324893	1.05561	0.947821	0.456504	-3.21796	-2.15464	-1.62317	-1.3412	-1.53164	0.698184	-0.687459	-0.331989	1.26535	-2.52703	1.84423
6.9	6.18571	-2.43652	0.810983	-0.259921	-0.435458	-0.223607	-1.2529	1.09208	0.73717	0.395177	NaN	0.290449	0.952171	-0.717986	1.79717	-1.81159	8.01994	-1.32807	-1.20383	1.44899	0.299325	0.0459937	-0.582715	-0.232357	0.739457	-0.736775	-0.992052	2.25948	1.129	0.171384	-0.812258	-1.58096	-0.323029	1.646	2.92404	1.51456	-0.599642	-0.0240267	-2.90705	-0.733999	-1.76875	-0.835087	-1.53164	-0.505582	1.48346	0.0585858	-1.35261	-2.40922	-0.144645
7.2	9.34629	-0.0594267	1.35164	2.6281	-2.01894	4.24853	-1.08359	1.6248	3.00538	0.395177	NaN	-0.539404	0.952171	-0.813083	-0.239032	-0.770446	8.48689	-2.13296	-1.29975	0.902201	0.299325	-0.0376313	0.404938	0.564296	0.355324	0.783555	0.132541	-0.952528	-1.27012	-0.949204	-1.89527	-2.57294	0.349948	1.23706	-0.324893	1.97352	1.33469	0.616681	-3.0625	-1.20755	-1.18644	0.430197	1.25316	-2.19086	0.518609	1.62089	-0.479959	-2.64484	0.216968
7.5	8.44327	0.534845	0.270327	0.317681	0.0395869	-0.223607	-1.59152	3.22297	1.87128	1.0538	65535	2.11612	2.51311	-0.337596	0.026559	-1.81159	5.91864	-1.19392	0.330934	1.72238	1.121	0.714993	0.404938	-1.56011	2.75616	0.900503	0.855494	1.04113	0	0.369135	-1.58584	0.650985	1.8305	4.09966	-0.324893	0.596646	-0.212776	-2.10633	-3.52887	-1.83894	-0.458564	0.0506112	-0.13924	-0.746335	-0.928672	-1.50372	-1.35261	-2.29141	0.940194
7.8	9.7978	0.534845	-0.810982	0.317681	-0.435458	-0.223607	-1.42221	3.7557	1.49324	0.395177	NaN	1.95015	-1.23314	-0.622888	1.79717	1.31184	3.3504	-0.657328	-0.148681	1.72238	1.23838	0.714993	-0.780246	0.896234	0.355324	-0.0935588	0.775166	-0.62025	-0.282249	-0.685536	-0.502827	-0.712983	0.88833	2.05494	-0.324893	1.97352	-1.76024	-1.62579	-1.50793	-1.20755	-1.4776	0.809782	1.25316	-0.0240753	0.518609	0.839737	2.138	-1.93798	0.578581
8.1	6.41146	-0.356563	-1.35164	0.317681	-1.2272	-0.223607	-1.59152	0.825721	0.73717	-0.922078	NaN	1.28627	0.0156095	0.137891	-0.327563	-0.562217	4.05083	-2.66956	-1.58752	0.628806	4.4077	0.882244	0.99753	2.02483	2.66012	2.01151	0.694838	0.708858	0.846748	0.764636	-0.193395	-2.20095	1.29212	2.46389	-0.324893	2.89144	0.560955	-2.10633	-3.21796	-1.68109	-0.60414	-0.0759168	-1.53164	0.457432	0.518609	0.449162	1.26535	-0.406445	0.0361614
8.4	5.7342	-0.0594267	0.810983	0.317681	-1.2272	-0.223607	-0.744969	1.09208	1.1152	0.0658627	NaN	0.290449	1.26436	-0.242498	-0.947276	0.0624687	3.81735	-0.254882	2.53716	0.628806	0.0645602	-0.121256	0.602469	0.298745	-0.60501	-0.0935588	0.775166	-0.287973	-1.41125	0.435052	-0.193395	0.774982	0.215353	0.725875	-0.324893	1.74404	0.560955	-3.06739	-2.44067	2.10729	0.706043	0.0506112	-0.13924	-0.746335	0.277395	2.79261	0.392695	-2.52703	1.121
8.7	7.54024	1.42625	-1.35164	3.2057	-3.91912	8.72067	-0.744969	1.35844	-1.53104	0.0658627	NaN	-1.36926	1.26436	0.423184	2.41688	-0.770446	7.78646	1.48905	0.0431653	0.0820179	0.0645602	0.129619	2.57778	1.89205	0.83549	0.608132	0.373526	-0.62025	-0.987872	0.237301	2.12734	0.278993	0.619139	0.62364	-0.324893	0.596646	0.17409	-0.34438	-3.68433	-0.260451	-0.0218365	0.0506112	-1.53164	0.216678	-2.61717	0.449162	-0.479959	-1.46674	0.397774
9	5.95995	-0.0594267	-0.810982	-0.837525	-2.33564	4.24853	-0.91428	0.559359	0.73717	-0.263451	NaN	-1.36926	-1.23314	0.613379	2.32835	-0.14576	4.51778	0.818306	0.52278	0.902201	-0.757116	-0.706631	0.404938	0.165969	0.0672232	-0.0350845	-0.751067	-0.952528	-0.141125	0.171384	-0.812258	0.898979	1.6959	1.03258	-0.324893	1.05561	1.72155	-0.82491	-3.83979	0.213097	-0.895292	-0.328974	-0.13924	1.42045	-0.205032	0.839737	-1.35261	-1.34893	-0.506258
9.3	5.7342	0.237709	-1.35164	2.05049	-0.118761	-0.223607	-0.406347	-1.83789	1.87128	-1.58071	NaN	-0.539404	0.639983	2.03984	0.734802	0.0624687	1.94953	1.6232	-0.724217	-1.83174	1.47315	0.213244	1.59012	-0.0995817	-1.08518	0.958977	-0.108443	0.0443035	0	2.08298	0.734901	1.76696	4.11862	5.6332	-0.324893	2.203	0.17409	-1.94615	-4.1507	-0.418301	-1.33202	-0.455502	-0.13924	0.938938	-1.89353	0.839737	-0.479959	-2.99827	-0.867871
9.6	7.54024	2.02053	0.810983	0.895285	-1.86059	-0.223607	-0.91428	0.825721	3.38342	-1.91002	NaN	-0.373433	0.639983	0.993769	-0.150502	-0.14576	4.51778	2.83053	0.0431653	-0.46477	0.181943	0.965869	2.18271	-0.365133	-0.0288099	-0.678301	-0.911724	0.930376	0	0.500969	0.425469	1.64296	2.09969	2.77059	-0.324893	2.43248	-0.599642	0.13615	-3.0625	0.528795	-0.895292	1.94854	-1.53164	2.1427	0.0361823	-1.50372	-1.35261	-1.34893	-0.687064
9.9	6.63722	-0.0594267	-1.35164	4.36091	-1.70225	-0.223607	-1.2529	-1.57153	7.54181	-0.922078	NaN	-0.207463	-0.920952	-0.337596	-0.593154	0.0624687	4.51778	1.6232	-0.436449	-0.191375	-0.874498	0.380494	-1.96543	-0.0331939	-1.18121	-0.561352	-0.992052	1.70569	-1.129	-0.619619	-0.502827	3.13093	2.36888	2.77059	-0.324893	4.03884	1.33469	0.616681	-4.1507	-0.891848	-0.895292	0.430197	-1.53164	0.457432	0.277395	-1.50372	-1.35261	-2.64484	-1.41029
10.2	7.31449	-0.950836	2.9736	-1.41513	-4.07747	-0.223607	-1.42221	1.35844	1.87128	-1.58071	NaN	-0.207463	1.57655	1.56435	-1.56699	-1.60336	4.2843	4.57447	0.714625	-0.191375	0.416707	1.80212	3.17037	-0.564296	-0.31691	0.608132	0.212869	1.59493	-0.423374	0.89647	1.19905	2.75894	1.29212	3.58848	-0.324893	2.203	0.560955	-0.0240267	-3.83979	0.370946	-1.18644	0.0506112	-0.13924	0.216678	0.277395	-0.331989	-1.35261	-2.64484	-1.22948
10.5	7.54024	-0.356563	0.270327	2.05049	-0.910503	-0.223607	-1.2529	1.6248	12.4563	-0.592765	NaN	-0.871345	-1.23314	0.898671	0.20362	1.93653	1.94953	3.23298	0.426857	2.81596	-1.34403	0.296869	1.39259	-0.564296	1.12359	0.315761	1.49812	1.92721	1.129	0.830553	0.270753	1.27097	2.09969	3.99743	-0.324893	2.43248	-1.37337	-0.985087	-4.1507	0.213097	0.269316	-0.582031	1.25316	0.216678	-0.446245	2.01146	-1.35261	-1.58455	-0.687064
10.8	8.44327	-0.356563	0.270327	3.7833	0.0395869	-0.223607	-0.91428	1.6248	6.78574	-0.592765	NaN	-2.36508	-2.1697	0.423184	-1.47846	-0.353989	3.81735	3.23298	1.38609	1.17559	0.534089	1.80212	1.59012	0.630683	1.69979	0.958977	0.534182	1.04113	-0.705623	0.105467	1.19905	1.27097	2.63807	3.79295	-0.324893	1.51456	1.33469	-0.664734	-3.83979	0.0552471	1.14277	0.303668	-0.13924	1.17969	-0.446245	1.62089	-1.35261	-0.995496	-0.506258
11.1	5.95995	-0.6537	0.270327	-0.259921	0.989678	-0.223607	-0.91428	1.6248	7.91984	-1.58071	NaN	-0.0414927	0.327797	0.232989	0.646272	-0.978675	4.2843	4.03787	1.67385	-0.191375	5.112	1.30037	1.98518	3.35258	4.38872	2.83015	0.935822	2.92404	2.25799	2.41256	0.889616	1.27097	2.63807	6.04215	-0.324893	0.826126	1.33469	0.296327	-3.37342	2.73869	0.997195	0.430197	-0.13924	-2.43161	-0.687459	0.0585858	-1.35261	-1.11331	0.216968
11.4	3.92815	-0.6537	1.35164	0.895285	-0.435458	-0.223607	-0.91428	1.09208	0.73717	-1.25139	NaN	1.45224	-1.23314	2.61043	0.911863	-0.770446	6.61908	1.3549	-1.29975	2.81596	0.416707	-0.204881	2.57778	1.0954	0.643423	0.315761	0.775166	-1.06329	0.141125	0.89647	0.425469	2.75894	2.90726	2.87283	-0.324893	2.43248	-0.212776	-0.0240267	-2.28522	1.94944	-1.4776	-0.328974	-0.13924	-1.70935	-0.446245	0.0585858	1.26535	-2.40922	-1.41029
11.7	7.08873	-1.24797	1.35164	2.6281	-0.435458	-0.223607	-1.76084	-0.239725	9.81002	-0.592765	NaN	-0.539404	-2.1697	1.75455	0.380681	-0.562217	4.98474	1.48905	-0.436449	-1.01156	-0.757116	-0.372131	-0.780246	-1.16179	0.739457	-0.0350845	-0.911724	2.37024	0.423374	1.09422	1.6632	0.898979	2.23429	3.48625	-0.324893	1.74404	0.560955	-0.504557	-2.44067	0.370946	-0.895292	0.683253	-0.13924	0.698184	-0.446245	1.62089	-1.35261	-1.23112	-0.687064
12	5.50844	0.534845	3.51426	2.6281	-1.86059	-0.223607	-0.575658	4.28842	2.62735	0.0658627	NaN	-1.36926	-2.48189	-0.622888	1.44305	0.687155	3.3504	0.952455	-1.97121	1.17559	-0.874498	-0.706631	-2.16296	0.497908	0.54739	0.432709	-0.269099	0.0443035	-1.41125	0.435052	-0.0386789	1.76696	-0.457625	1.54376	-0.324893	4.26832	-0.599642	0.296327	-1.81885	1.47589	0.706043	0.303668	-1.53164	-0.987089	0.0361823	2.01146	-1.35261	-2.1736	0.216968
12.3	5.50844	-0.356563	0.810983	2.05049	-2.81069	-0.223607	-1.2529	4.82114	2.62735	1.0538	NaN	-0.705375	0.952171	-0.432694	0.026559	0.687155	4.51778	-0.389031	-0.724217	-1.01156	0.416707	-0.204881	2.18271	1.95844	-0.124843	-0.268981	0.61451	1.70569	0.282249	1.68747	1.19905	0.650985	2.63807	1.03258	-0.324893	3.57988	1.33469	-1.30544	-3.99525	0.370946	1.5795	-0.0759168	-0.13924	-0.264829	-0.928672	1.23031	-0.479959	-1.70236	-0.144645
12.6	6.86298	-0.6537	0.270327	-0.259921	-2.01894	-0.223607	-1.76084	-1.03881	6.78574	-1.58071	NaN	0.456419	-0.296578	0.328086	1.00039	-0.770446	4.2843	2.96468	0.330934	2.26917	-0.404969	0.965869	0.00987662	1.36095	1.12359	0.374235	0.775166	1.04113	1.41125	2.08298	-0.193395	3.62691	0.484543	1.74824	-0.324893	2.43248	0.947821	-1.30544	-4.30616	0.686644	-1.62317	0.809782	-0.13924	0.698184	-0.205032	-0.722564	-1.35261	-0.995496	0.397774
12.9	7.31449	-0.950836	0.270327	3.2057	-0.910503	-0.223607	-1.59152	-0.506087	2.24931	-0.263451	NaN	2.11612	0.0156095	1.84965	0.469211	1.52007	1.01563	2.69639	-0.340526	-0.191375	2.06006	1.04949	-0.187654	1.49372	2.17996	1.54372	1.33746	0.376581	2.39912	1.55564	1.6632	0.0309991	3.84943	3.58848	-0.324893	2.203	0.17409	-2.2665	-4.1507	-0.891848	0.706043	0.809782	-0.13924	-0.746335	1.24225	2.40204	0.392695	-1.46674	0.0361614
13.2	5.28269	0.237709	0.810983	2.05049	-1.06885	-0.223607	-1.42221	1.6248	2.62735	-0.263451	NaN	0.622389	0.327797	0.613379	-0.327563	-2.43628	3.11692	1.89149	0.52278	0.628806	0.768854	-0.539381	-0.385185	-1.49372	-0.508977	0.198812	-1.47402	1.15189	-0.987872	0.89647	-0.348111	1.51896	0.215353	1.03258	-0.324893	3.3504	-1.37337	-1.14526	-2.12976	0.528795	-0.895292	0.17714	-0.13924	-0.987089	-0.928672	0.0585858	-0.479959	-1.23112	2.02503
13.5	4.15391	0.831982	-0.810982	1.47289	-0.27711	-0.223607	-0.406347	1.35844	0.73717	0.395177	NaN	-0.539404	1.26436	1.94474	-0.416093	0.478926	3.81735	2.56224	0.810548	1.17559	1.121	1.21674	1.39259	-0.829847	0.54739	0.900503	-0.0281147	2.37024	1.55237	2.67623	0.580185	2.75894	5.32998	3.38401	-0.324893	2.43248	-0.599642	-0.664734	-3.0625	0.213097	-0.60414	0.0506112	-1.53164	1.42045	-0.205032	1.23031	1.26535	-1.23112	-0.506258
13.8	4.60542	-0.6537	-0.810982	0.317681	-2.33564	-0.223607	-0.91428	0.825721	1.87128	-0.592765	NaN	1.95015	1.88873	0.613379	-1.3014	-0.14576	3.3504	-1.59637	0.139088	-0.46477	-1.22665	-1.04113	0.00987662	-0.630683	-0.31691	0.140338	-0.108443	0.930376	-0.564498	-0.0263667	-1.12169	0.154996	0.484543	-0.9099	-0.324893	1.74404	-0.599642	-1.14526	-3.52887	-1.68109	0.414891	-0.328974	1.25316	1.17969	0.518609	0.0585858	-0.479959	-2.52703	-0.867871
14.1	6.18571	-0.356563	-0.270328	1.47289	-0.910503	-0.223607	-1.42221	-0.239725	0.73717	0.724491	NaN	-0.539404	-0.296578	1.27906	-2.1867	1.93653	1.2491	2.02564	-1.01199	0.0820179	1.70791	-0.288506	1.59012	1.82566	0.739457	1.07593	0.935822	1.37341	0.282249	-0.158201	1.19905	0.154996	1.56131	1.95271	-0.324893	3.57988	0.560955	-0.0240267	-2.59613	-1.68109	1.72507	0.430197	-0.13924	-0.505582	0.759823	-1.11314	-0.479959	-0.877686	-0.144645
14.4	5.7342	1.42625	-1.89229	3.7833	-0.593807	-0.223607	-1.2529	-1.03881	1.49324	2.04175	NaN	-1.7012	-1.23314	1.18396	-0.504623	-0.978675	1.94953	-0.657328	-0.244603	2.26917	1.94268	1.21674	-0.385185	-0.0995817	0.25929	1.48525	-0.188771	-0.73101	-0.987872	0.500969	1.97263	0.650985	0.215353	2.46389	-0.324893	1.51456	0.17409	-0.34438	-3.0625	-0.891848	1.28835	-0.328974	-1.53164	1.17969	0.518609	0.449162	0.392695	-1.58455	0.0361614
14.7	3.47664	-1.54511	-0.810982	-1.41513	1.14803	-0.223607	-1.08359	1.35844	0.359134	1.38312	NaN	1.1203	0.327797	3.27611	-0.504623	-1.60336	1.94953	-1.32807	-0.82014	2.54256	1.121	0.547744	-1.57037	2.88787	1.41169	1.95304	-0.269099	0.265822	-0.705623	-1.27879	1.19905	-0.712983	1.02293	1.74824	-0.324893	2.89144	-0.986508	-1.46562	-2.44067	0.213097	1.14277	-1.3412	-0.13924	2.1427	-1.16989	-1.11314	0.392695	-0.877686	0.0361614
15	6.41146	-0.356563	-1.35164	3.7833	-0.118761	-0.223607	-1.42221	0.559359	1.87128	1.71243	NaN	-0.871345	-0.296578	1.56435	-0.504623	-0.353989	-0.385238	0.147563	-1.29975	-0.46477	0.0645602	0.965869	0.602469	-0.298745	0.54739	0.549658	1.25713	-1.94936	0	-0.0263667	0.734901	-0.83698	3.04186	3.0773	-0.324893	2.43248	-0.212776	-0.0240267	-3.83979	-1.52325	0.851619	-1.72079	-0.13924	-0.0240753	0.518609	0.839737	-0.479959	-1.11331	0.578581
15.3	7.766	-1.24797	1.89229	1.47289	0.197935	-0.223607	-1.59152	2.15753	3.76145	0.724491	NaN	-0.373433	-0.920952	0.613379	-0.327563	-1.60336	1.71606	-0.389031	-0.532372	0.0820179	-0.287586	-0.455756	0.799999	-0.365133	-0.701044	-0.152033	-0.349427	-0.73101	0.987872	-0.290034	0.270753	-1.45697	-0.0538384	0.62364	-0.324893	2.203	0.560955	-0.0240267	-3.52887	-0.733999	1.72507	0.17714	-1.53164	2.38346	-1.16989	2.01146	-1.35261	0.182606	0.216968
15.6	5.95995	0.831982	0.270327	1.47289	-1.70225	-0.223607	-1.08359	2.15753	3.00538	-0.263451	NaN	-0.871345	-1.85751	0.898671	-0.416093	-0.978675	0.315194	2.15979	0.618702	0.0820179	0.886236	0.380494	0.99753	-0.896234	-0.124843	1.42677	-1.55435	-0.62025	-1.129	-0.0263667	1.81791	0.898979	1.56131	1.95271	-0.324893	3.3504	-0.212776	0.456504	-2.59613	-0.260451	0.560467	-0.835087	-0.13924	0.457432	-0.205032	0.449162	-0.479959	0.182606	0.759387
15.9	6.18571	-0.356563	-0.810982	2.05049	0.672981	-0.223607	-1.42221	1.09208	6.78574	-1.58071	NaN	-1.36926	-0.608766	-0.432694	0.11509	-0.978675	-1.08567	-1.05977	-1.29975	-1.28495	1.00362	-1.29201	-0.582715	0.564296	0.451357	0.491183	0.212869	-1.8386	0.282249	-0.883287	1.04433	-2.44894	1.29212	1.646	-0.324893	2.66196	-0.986508	0.456504	-2.75159	1.31804	0.12374	1.18937	2.64556	0.457432	0.0361823	0.449162	2.138	-0.288635	-0.144645
16.2	3.25088	-0.950836	-1.35164	1.47289	0.197935	-0.223607	-1.42221	0.825721	2.24931	0.395177	NaN	-0.705375	1.26436	0.137891	-1.3014	0.478926	-1.7861	-0.254882	0.714625	-0.46477	-1.46141	-0.0376313	1.19506	-0.165969	1.12359	0.608132	1.01615	1.48417	-0.705623	0.435052	1.35376	-1.58096	0.484543	1.13482	-0.324893	1.97352	1.33469	-0.34438	-2.12976	0.686644	-0.0218365	-0.328974	4.03796	2.38346	0.277395	0.449162	-0.479959	-0.642066	-0.325452
16.5	5.50844	-1.54511	0.270327	-0.259921	1.30637	-0.223607	-1.59152	0.825721	1.49324	-1.25139	NaN	-1.03732	0.639983	1.56435	2.06276	-0.353989	-2.25305	-0.657328	-1.01199	-1.28495	-0.757116	-1.04113	0.00987662	-0.365133	-0.508977	0.140338	-0.670739	-0.0664553	-0.564498	-1.74021	0.734901	0.154996	-1.39979	0.316931	-0.324893	4.26832	-0.986508	-0.504557	-0.264277	0.0552471	0.414891	0.303668	-1.53164	0.938938	-1.16989	0.0585858	0.392695	-1.58455	1.48261
16.8	3.02513	-0.950836	1.35164	0.895285	-1.5439	8.72067	-1.42221	0.825721	3.76145	0.0658627	NaN	2.28209	0.0156095	-0.242498	0.469211	-0.562217	-2.01958	1.3549	-0.340526	-0.738164	-1.93094	-1.79376	-2.75555	-0.564296	-0.0288099	-0.502878	-0.510083	-1.50632	-1.41125	-1.60837	-3.59714	-2.57294	-1.2652	-1.72779	-0.324893	3.3504	0.17409	-1.14526	-2.44067	0.213097	0.414891	0.0506112	-0.13924	1.90195	-0.687459	0.449162	1.26535	-1.34893	2.20584
17.1	3.02513	-0.356563	-0.810982	2.6281	-2.65234	-0.223607	-1.76084	0.292998	1.49324	-0.263451	NaN	1.61821	0.327797	0.993769	1.44305	-0.14576	-1.31915	-2.26711	-1.29975	-0.46477	-0.287586	-0.288506	0.00987662	-0.697071	-1.56534	-0.327456	-0.0281147	-1.8386	-1.129	-1.74021	-1.58584	-1.20897	-1.80358	0.11246	-0.324893	2.66196	-1.37337	0.13615	-2.59613	-0.260451	4.05429	-0.582031	-0.13924	0.216678	-1.16989	0.0585858	-1.35261	-2.1736	-0.325452
17.4	6.41146	1.12912	-0.270328	0.317681	-3.12738	-0.223607	-1.08359	0.559359	2.24931	-0.263451	NaN	2.11612	3.13748	0.423184	-0.0619715	0.0624687	-2.25305	-1.05977	-0.244603	0.0820179	-0.639734	-0.0376313	-0.582715	-1.69289	-0.412944	0.081864	-1.15271	-1.50632	-0.705623	-1.60837	-1.27641	-1.08497	0.619139	0.316931	-0.324893	2.43248	-1.37337	-2.74703	-3.83979	0.686644	-0.458564	-0.455502	-1.53164	-0.987089	0.0361823	0.0585858	0.392695	-1.23112	0.0361614
17.7	5.05693	-0.950836	0.270327	-0.837525	-2.49399	-0.223607	-0.91428	-1.83789	-0.396938	-0.922078	NaN	0.290449	4.38623	0.328086	-1.12434	2.35298	-2.25305	-3.3403	-0.916063	-1.55835	0.0645602	-0.790256	-1.17531	-0.298745	-1.37328	-0.619827	-0.510083	-1.72784	-1.27012	-3.2563	-0.812258	-3.56492	-0.861411	-0.296484	-0.324893	4.95675	-0.599642	0.776857	-1.66339	-0.57615	3.03526	0.683253	-0.13924	-1.4686	0.277395	3.18319	-1.35261	-1.82017	1.48261
18	7.31449	-1.54511	0.270327	2.05049	-1.5439	-0.223607	-1.59152	1.09208	-1.15301	0.0658627	NaN	0.456419	-0.296578	-0.527791	1.97423	3.39413	-2.48653	-0.791476	-2.93044	0.628806	0.534089	-0.455756	0.00987662	-0.962622	1.41169	0.0233897	-0.590411	-0.73101	-0.282249	-0.685536	0.889616	0.154996	-0.188433	0.725875	-0.324893	1.05561	-0.986508	-0.82491	-2.28522	-0.57615	1.28835	1.06284	-1.53164	-1.4686	0.518609	1.23031	-1.35261	-1.11331	-0.687064
18.3	5.50844	-1.84224	1.89229	1.47289	-1.38555	-0.223607	-0.91428	-1.30517	-0.396938	0.724491	NaN	0.124478	2.51311	-0.147401	-0.593154	3.39413	-2.25305	-3.3403	-2.35491	-0.191375	0.181943	-1.20838	-1.17531	-0.497908	-0.124843	0.491183	0.293198	-1.06329	-1.129	-0.685536	-1.27641	-2.94493	-0.0538384	0.828111	-0.324893	3.12092	-0.212776	-1.78597	-3.99525	0.370946	-0.312988	0.93631	-0.13924	-0.0240753	0.277395	2.01146	-1.35261	-0.524255	0.0361614
18.6	6.18571	-0.6537	-1.89229	2.05049	-0.27711	-0.223607	-1.59152	-0.506087	2.24931	1.0538	NaN	1.1203	0.327797	-0.242498	0.292151	1.10361	-2.01958	-2.13296	-1.68345	-1.01156	0.416707	-0.0376313	-1.96543	-0.365133	1.31566	0.198812	0.534182	-1.17405	0.846748	-0.553702	-3.28771	-2.57294	-0.323029	0.11246	-0.324893	2.89144	-0.986508	-1.62579	-3.0625	-0.102602	-0.895292	-0.708559	-1.53164	-0.505582	2.20711	-0.722564	0.392695	0.771657	1.30181
18.9	6.86298	-0.6537	-0.270328	1.47289	-1.86059	-0.223607	-1.42221	0.292998	0.359134	-0.592765	NaN	0.954331	-0.608766	-0.432694	-0.0619715	0.478926	-2.72001	-1.19392	-1.20383	-0.46477	2.64697	1.55124	-1.96543	0.962622	1.12359	1.42677	0.694838	0.819617	-0.423374	-0.553702	0.270753	-1.82896	2.90726	1.33929	-0.324893	1.74404	-1.37337	0.456504	-2.44067	0.0552471	0.997195	-0.455502	2.64556	-0.0240753	1.24225	-1.11314	-1.35261	0.182606	-1.22948
19.2	5.05693	-0.950836	0.270327	0.317681	-0.910503	-0.223607	-0.575658	0.292998	-0.396938	-0.592765	NaN	-0.705375	2.51311	-1.00328	-0.504623	0.478926	-2.72001	-3.20615	-1.97121	0.355412	2.52959	0.714993	-1.96543	1.0954	-0.508977	1.89456	-0.269099	-0.73101	-2.54024	-2.33346	-1.89527	-2.69694	0.0807572	1.85047	-0.324893	1.51456	-0.212776	0.13615	-1.35248	-0.260451	-0.0218365	1.3159	2.64556	-0.746335	1.72468	-0.331989	-1.35261	0.0647957	0.578581
19.5	6.86298	0.831982	-0.810982	0.895285	-3.12738	-0.223607	-0.575658	-0.772449	3.38342	-0.263451	NaN	0.290449	-0.296578	-1.00328	-0.858745	-0.353989	-2.25305	1.0866	-1.58752	-0.738164	3.23388	1.46762	0.00987662	0.962622	-0.89311	1.83609	1.41779	-1.39556	1.129	-1.27879	0.889616	-1.70496	1.29212	2.25941	-0.324893	-0.0917913	-0.212776	2.21845	-0.575191	-0.102602	0.851619	-0.582031	-0.13924	-0.987089	-0.446245	0.449162	-0.479959	0.418226	0.397774
19.8	3.47664	-1.24797	-1.35164	0.895285	-2.96903	-0.223607	-1.08359	-1.03881	0.359134	0.724491	NaN	0.456419	0.0156095	-1.76406	-1.3014	1.93653	-2.72001	1.3549	-0.436449	-0.46477	1.121	0.464119	1.98518	1.0954	1.41169	2.12846	2.70304	0.930376	0.705623	0.632802	0.580185	1.89096	2.77267	2.56612	-0.324893	1.74404	-0.599642	-0.504557	-0.419734	0.213097	0.414891	0.0506112	-0.13924	0.457432	0.0361823	0.839737	2.138	-0.524255	-1.04868
20.1	3.70239	0.534845	-0.270328	-1.99273	-3.60243	-0.223607	-1.76084	-0.239725	1.1152	0.0658627	NaN	-0.705375	0.327797	-1.85916	1.44305	1.52007	-2.25305	3.23298	0.330934	0.355412	2.76435	2.13662	-0.385185	1.56011	0.163257	1.66067	1.33746	1.81645	0.141125	1.42381	1.81791	3.62691	4.52241	3.17954	-0.324893	1.74404	-0.212776	-1.62579	-1.04156	-0.102602	1.87065	0.430197	-1.53164	-0.505582	0.277395	2.01146	1.26535	-0.0530146	1.121
20.4	3.02513	-0.0594267	2.43295	-0.837525	-1.70225	-0.223607	-1.42221	0.292998	2.62735	-1.25139	NaN	0.290449	-1.54533	-2.90523	-1.21287	0.0624687	-2.72001	0.550009	1.09832	-0.191375	1.121	0.129619	-1.17531	-0.697071	-0.220877	1.01745	0.694838	0.376581	1.27012	0.632802	0.580185	1.14697	2.09969	1.74824	-0.324893	3.12092	-0.212776	0.456504	-2.59613	1.16019	0.997195	3.21382	-1.53164	1.6612	-1.16989	2.01146	-1.35261	0.889467	0.397774
20.7	4.60542	-0.356563	1.35164	-0.259921	0.0395869	-0.223607	-0.575658	0.559359	3.00538	-0.592765	NaN	-0.0414927	-1.85751	-2.04935	0.734802	0.895384	-3.18696	-0.254882	1.19424	1.44899	0.651472	-0.288506	-0.582715	-0.630683	0.0672232	0.374235	-0.108443	0.819617	1.97574	0.632802	2.28206	0.278993	0.619139	0.930347	-0.324893	1.74404	0.560955	0.776857	-1.35248	1.47589	0.706043	1.3159	-0.13924	-0.264829	0.277395	-0.331989	3.01065	-0.524255	1.121
21	1.67059	0.831982	-0.270328	0.317681	-3.28573	-0.223607	0.60952	1.09208	-0.396938	0.0658627	NaN	-1.20329	-0.296578	-2.42974	1.62011	-0.14576	-2.25305	-1.05977	-1.10791	1.44899	-0.522351	-0.121256	-1.7679	-0.564296	1.79582	-0.152033	-0.670739	0.155063	-0.705623	0.632802	-0.0386789	-1.82896	0.753735	0.0102236	-0.324893	4.72727	0.560955	0.456504	-0.575191	1.16019	0.560467	-0.455502	2.64556	0.216678	-1.16989	0.839737	1.26535	-1.11331	-0.325452
21.3	0.541814	0.237709	-0.810982	-1.99273	-3.60243	-0.223607	-1.42221	0.292998	-0.018902	-0.922078	NaN	0.622389	0.952171	-1.85916	1.26599	0.270698	-2.25305	-2.13296	-0.82014	0.355412	0.768854	1.13312	0.207407	-0.232357	0.25929	1.19287	-0.269099	-1.8386	-1.97574	-0.421868	-0.657542	-3.06893	-0.861411	-0.194249	-0.324893	0.826126	-0.212776	0.937034	-1.19702	0.528795	0.12374	0.556725	2.64556	0.216678	1.00104	-1.50372	-0.479959	-1.70236	-0.687064
21.6	2.79937	0.831982	1.35164	-2.57034	-2.17729	-0.223607	-1.42221	0.559359	0.359134	-0.922078	NaN	0.124478	-0.296578	-1.66896	1.08892	1.93653	-2.48653	-2.26711	-1.87529	-0.738164	-0.639734	0.0459937	-2.75555	-0.497908	1.02756	-0.444404	0.293198	-1.06329	-1.69349	-0.883287	-1.27641	-2.69694	-0.59222	0.316931	-0.324893	2.66196	-1.37337	-1.30544	-2.12976	1.00234	3.03526	-0.202445	1.25316	0.698184	-0.687459	0.449162	-1.35261	-2.64484	1.66342
21.9	3.02513	-1.84224	-1.35164	2.05049	-1.06885	-0.223607	-0.406347	0.0266363	-0.018902	-1.25139	NaN	-0.207463	-2.1697	-2.14445	1.26599	2.14476	-3.42044	0.818306	-0.244603	1.44899	1.82529	1.30037	-0.977777	0.165969	1.41169	0.783555	-0.0281147	1.59493	1.83462	-0.81737	-0.0386789	-3.19293	0.88833	1.74824	-0.324893	2.203	-0.986508	-1.30544	-2.75159	-0.102602	3.03526	-1.08814	1.25316	2.1427	0.277395	0.839737	-0.479959	-2.29141	0.0361614
22.2	3.02513	-1.24797	0.810983	-0.259921	-0.27711	-0.223607	-1.42221	2.15753	1.87128	-0.922078	NaN	-1.03732	-0.920952	-2.04935	-0.0619715	1.52007	-3.18696	0.415861	0.906471	-0.46477	1.82529	1.21674	-1.17531	0.43152	0.54739	0.081864	-0.349427	0.598099	1.27012	0.830553	1.04433	1.76696	2.23429	1.03258	-0.324893	1.05561	0.947821	-0.82491	-3.0625	1.16019	0.706043	0.556725	-1.53164	-0.0240753	-0.205032	0.449162	-0.479959	-1.93798	-1.41029
22.5	2.34786	-0.0594267	-0.270328	0.317681	-0.593807	-0.223607	-1.59152	1.35844	2.24931	0.395177	NaN	-1.03732	0.639983	-1.95425	-0.416093	-0.14576	-3.65392	2.15979	0.330934	1.17559	0.534089	0.129619	2.38024	1.02901	0.643423	0.783555	1.17681	0.930376	0.564498	1.16014	2.59149	2.38694	0.88833	2.66836	-0.324893	0.367167	-0.212776	1.41756	-2.90705	0.370946	-0.0218365	-0.328974	-1.53164	0.698184	0.518609	-0.331989	0.392695	-3.3517	0.216968
22.8	1.89635	-1.84224	0.270327	0.317681	0.0395869	-0.223607	-1.59152	0.825721	2.24931	0.724491	NaN	0.78836	-1.23314	-2.71503	-1.21287	1.10361	-3.42044	-1.86466	-1.97121	0.355412	0.416707	0.129619	0.00987662	0.829846	-0.220877	-0.327456	-0.269099	-1.06329	1.55237	-0.619619	-0.502827	-2.32495	1.29212	0.11246	-0.324893	-0.78023	2.10842	0.296327	-2.12976	-0.57615	-0.895292	0.809782	-0.13924	-0.264829	-1.16989	0.839737	-1.35261	-1.11331	0.0361614
23.1	4.60542	-0.0594267	1.89229	-0.259921	0.0395869	-0.223607	-1.59152	1.09208	1.49324	0.724491	NaN	-0.0414927	0.327797	-2.52484	1.97423	1.10361	-3.18696	-0.254882	-0.532372	0.355412	2.17744	-0.455756	-1.17531	0.564296	0.163257	1.3683	0.373526	-0.177214	0.846748	0.764636	0.425469	0.278993	0.753735	1.54376	-0.324893	0.367167	-0.599642	0.296327	-2.28522	-0.418301	-1.04087	0.809782	1.25316	0.216678	-0.928672	-0.722564	-0.479959	-3.3517	0.0361614
23.4	4.60542	0.237709	1.35164	-1.41513	-0.752155	-0.223607	-1.59152	0.292998	3.00538	-0.922078	NaN	-1.03732	-1.23314	-0.908181	1.26599	0.895384	-2.25305	0.550009	-1.39568	-0.46477	-0.874498	0.464119	-1.17531	-0.298745	1.21962	0.315761	-0.0281147	0.265822	-0.846748	-1.54246	-1.12169	-0.340992	0.215353	-0.0920125	-0.324893	0.596646	0.17409	0.13615	-2.59613	0.0552471	1.5795	0.683253	1.25316	1.6612	-0.687459	-0.331989	0.392695	0.182606	-0.144645
23.7	2.57362	-0.356563	4.05491	-0.259921	-1.38555	-0.223607	-1.42221	1.35844	3.76145	0.724491	NaN	0.456419	-0.920952	-1.95425	0.380681	2.35298	-2.95349	0.550009	-0.628295	0.0820179	-0.99188	0.631368	0.602469	-1.16179	1.41169	0.491183	0.694838	0.48734	-0.282249	-0.685536	1.97263	-0.0929977	0.753735	0.62364	-0.324893	-0.0917913	1.33469	-0.82491	-1.50793	-0.418301	-0.312988	1.82201	1.25316	-0.505582	-1.4111	0.839737	1.26535	-0.524255	-1.04868
24	3.02513	-0.6537	2.9736	-1.41513	-1.86059	-0.223607	-1.2529	-1.83789	4.51752	2.70037	NaN	0.290449	1.26436	-1.19347	0.557742	0.270698	-1.7861	-2.40126	-1.68345	-0.738164	0.768854	-0.623006	-0.977777	1.0954	-0.412944	0.374235	-0.269099	-0.952528	-0.705623	0.0395501	-0.502827	-0.588986	-1.1306	-0.39872	-0.324893	-0.0917913	1.33469	-0.504557	-1.66339	-0.102602	-0.458564	0.0506112	-1.53164	-0.264829	-0.446245	0.449162	0.392695	0.418226	0.759387
24.3	3.70239	-1.24797	-1.35164	-0.259921	-2.65234	-0.223607	-1.42221	1.09208	-0.396938	0.724491	NaN	1.1203	0.639983	-0.622888	-0.0619715	1.31184	-1.55262	-2.26711	-0.0527576	-1.28495	-1.10926	0.129619	0.207407	-1.22817	-0.31691	-1.73084	-1.715	-0.73101	-0.987872	-0.619619	-1.12169	-2.44894	-0.323029	-0.0920125	-0.324893	1.74404	0.17409	-0.985087	-0.730648	-0.57615	0.560467	0.683253	-1.53164	-0.264829	1.24225	2.40204	-0.479959	0.300416	0.578581
24.6	4.83117	-0.950836	-1.35164	0.895285	-1.2272	-0.223607	-0.575658	0.0266363	-1.15301	2.37106	NaN	0.456419	0.327797	-0.622888	0.380681	2.14476	-0.852191	-2.13296	0.139088	-1.01156	0.886236	-0.539381	-0.977777	-0.630683	-0.508977	-1.26304	-1.55435	-1.8386	-1.41125	-0.0263667	-0.657542	-0.83698	-0.323029	0.316931	-0.324893	0.137687	0.17409	-0.34438	-2.59613	-1.83894	0.269316	1.44242	-0.13924	-0.264829	-0.928672	0.449162	0.392695	-0.995496	0.397774
24.9	2.34786	-1.54511	0.270327	-1.41513	-2.01894	-0.223607	-1.2529	-0.239725	-0.018902	0.395177	NaN	-0.705375	0.327797	-0.908181	3.47925	2.35298	-1.31915	3.63543	0.618702	0.355412	-0.639734	-0.957506	-0.187654	1.02901	0.163257	-0.0350845	-0.188771	0.930376	0.564498	0.698719	1.97263	1.64296	1.6959	1.95271	-0.324893	2.43248	-0.212776	0.296327	-1.50793	-0.418301	-0.0218365	0.93631	-0.13924	0.216678	0.759823	2.40204	-1.35261	-2.1736	1.121
25.2	3.70239	0.534845	1.35164	1.47289	-2.49399	-0.223607	-1.42221	0.292998	-0.774972	2.04175	NaN	-0.207463	-2.1697	-0.622888	1.08892	2.97767	-0.852191	0.550009	1.19424	-0.191375	-1.10926	-0.0376313	2.77531	-0.0995817	-0.0288099	0.140338	0.132541	-0.398733	-1.41125	0.698719	0.889616	0.898979	1.02293	1.74824	-0.324893	1.05561	2.10842	-0.0240267	-2.90705	0.370946	0.12374	1.69548	-0.13924	-1.4686	1.24225	0.449162	-0.479959	-0.877686	-0.506258
25.5	3.70239	-1.54511	0.270327	-0.259921	-3.76078	-0.223607	-0.575658	0.559359	-0.396938	-1.58071	NaN	-1.7012	-1.23314	-1.38367	0.911863	1.7283	-2.01958	3.09883	0.235011	0.628806	-1.57879	0.380494	1.19506	-0.165969	-1.85344	0.081864	-0.429755	1.37341	0.423374	2.14889	1.50848	2.88293	0.619139	1.23706	-0.324893	2.89144	-0.986508	-2.2665	-1.50793	1.16019	0.851619	0.303668	-1.53164	-1.22784	-0.446245	0.0585858	1.26535	0.771657	-1.04868
25.8	3.70239	-0.356563	0.270327	-0.259921	-2.49399	-0.223607	0.270898	-1.57153	2.24931	-0.263451	NaN	0.456419	-1.85751	-0.0523037	0.292151	1.10361	-1.7861	4.97691	0.810548	0.355412	-1.46141	-0.957506	2.97284	1.0954	0.739457	0.140338	0.212869	0.930376	0.282249	2.47848	2.28206	1.76696	0.619139	1.33929	-0.324893	1.05561	-0.599642	-0.34438	-0.730648	0.844494	-0.895292	0.430197	-1.53164	2.38346	-1.89353	-1.11314	-0.479959	-1.34893	-1.04868
26.1	4.37966	-0.356563	-1.89229	-1.99273	-0.593807	-0.223607	-0.91428	-2.90334	-1.15301	-1.58071	NaN	-0.705375	-0.608766	-0.813083	1.8857	1.10361	-1.7861	3.09883	2.24939	-0.738164	-0.757116	-0.121256	1.39259	-0.165969	1.21962	0.491183	0.935822	0.48734	1.27012	2.9399	2.43678	2.13895	1.02293	0.828111	-0.324893	1.05561	0.17409	-0.0240267	0.0466373	0.0552471	0.269316	-0.835087	-0.13924	-0.0240753	-0.687459	0.0585858	1.26535	0.300416	0.759387
26.4	2.1221	0.534845	0.270327	1.47289	-0.27711	-0.223607	-0.744969	0.0266363	4.13949	-0.263451	NaN	-0.373433	3.76186	0.232989	3.21365	1.7283	-1.31915	3.23298	0.714625	0.0820179	1.82529	1.96937	-0.187654	-0.763459	-0.60501	1.3683	0.293198	0.265822	1.55237	1.22605	1.81791	5.11488	2.77267	2.25941	-0.324893	0.826126	-0.212776	1.8981	-0.575191	0.844494	0.997195	-0.835087	-1.53164	-0.987089	1.48346	1.62089	-0.479959	-0.759876	-0.506258
26.7	3.92815	-1.54511	-0.270328	1.47289	0.672981	-0.223607	-1.59152	-0.772449	4.89556	1.0538	NaN	1.78418	1.26436	1.65945	0.734802	1.52007	-0.385238	-0.120734	0.139088	0.355412	1.00362	0.296869	0.799999	1.0954	0.163257	0.549658	0.132541	0.376581	-0.564498	-0.158201	0.889616	3.13093	0.88833	1.23706	-0.324893	2.203	1.33469	-0.0240267	-0.730648	-0.891848	-0.458564	-0.0759168	1.25316	-0.987089	1.72468	-1.11314	-1.35261	-0.642066	1.84423
27	3.02513	-0.950836	4.05491	3.2057	-1.86059	-0.223607	-1.08359	-1.83789	10.9441	0.724491	NaN	-2.03314	-0.608766	1.27906	0.734802	0.895384	-0.852191	-1.32807	-0.628295	-0.738164	0.768854	0.296869	0.00987662	1.36095	0.931523	0.432709	-0.590411	-0.62025	1.41125	-1.08104	-0.0386789	0.526988	0.753735	2.05494	-0.324893	0.367167	-0.599642	1.09721	-1.50793	-0.418301	-0.458564	0.303668	-1.53164	-0.746335	-0.928672	-0.331989	1.26535	-2.1736	1.121
27.3	5.50844	1.12912	3.51426	1.47289	-4.07747	8.72067	0.270898	3.22297	7.54181	0.395177	NaN	0.456419	1.88873	0.708476	0.823333	1.7283	-1.7861	-0.254882	-1.29975	0.0820179	-1.93094	-0.873881	-1.7679	0.165969	-0.124843	1.25135	0.694838	1.26265	-0.141125	1.48972	-0.0386789	-0.712983	0.619139	0.725875	-0.324893	1.97352	1.72155	0.776857	0.357551	-0.57615	-1.4776	-0.961616	-1.53164	-0.746335	-0.205032	-0.722564	-0.479959	-2.29141	-1.22948
27.6	4.37966	-2.43652	0.810983	2.05049	-0.593807	-0.223607	1.11745	0.0266363	3.00538	2.04175	NaN	-0.373433	0.0156095	-0.622888	-0.416093	-0.14576	-1.55262	-1.32807	0.235011	1.99578	1.82529	0.129619	-0.187654	1.0954	1.79582	0.900503	0.534182	-0.287973	1.129	0.171384	-0.812258	0.650985	0.619139	1.33929	-0.324893	0.367167	-0.212776	0.937034	0.513008	-0.418301	0.414891	0.430197	-1.53164	0.938938	0.277395	0.839737	-0.479959	-1.23112	-0.144645
27.9	5.7342	-0.0594267	1.89229	4.93851	-2.33564	-0.223607	0.440209	-1.03881	2.24931	0.724491	NaN	0.290449	-0.608766	0.708476	2.23982	1.93653	-2.01958	-0.925625	-0.0527576	-1.01156	-0.522351	-0.204881	-0.582715	-1.0954	-0.220877	0.783555	-0.0281147	0.265822	0.705623	0.0395501	0.116037	-1.45697	-0.323029	1.85047	-0.324893	1.05561	0.560955	0.937034	-0.575191	-0.733999	1.87065	-0.708559	1.25316	-0.987089	0.0361823	-0.331989	-0.479959	-1.23112	0.397774
28.2	5.28269	-1.24797	-0.270328	3.2057	-1.2272	-0.223607	-0.744969	-0.239725	4.51752	2.70037	NaN	0.290449	-1.54533	-1.28857	0.469211	0.478926	-0.852191	0.818306	-0.340526	1.44899	0.181943	-0.204881	1.19506	-0.43152	0.83549	0.432709	-0.0281147	1.04113	-0.282249	-0.158201	1.35376	-2.69694	1.29212	0.725875	-0.324893	-0.321271	0.560955	0.296327	-0.886105	0.0552471	-0.458564	-0.202445	-0.13924	-1.22784	-0.928672	-0.331989	-1.35261	-1.82017	0.397774
28.5	5.50844	0.237709	1.89229	2.6281	-1.38555	-0.223607	-0.744969	3.7557	10.9441	-0.263451	NaN	0.124478	1.26436	-0.813083	-0.504623	-0.770446	-2.72001	-0.120734	0.330934	3.08935	0.416707	0.213244	-0.780246	0.43152	0.163257	0.081864	-0.108443	-0.287973	-1.97574	-0.0922837	-1.12169	-0.340992	-0.457625	0.11246	-0.324893	-0.0917913	1.72155	-0.184203	0.513008	-0.260451	-0.312988	-0.582031	-1.53164	0.216678	-0.446245	1.23031	0.392695	0.0647957	2.56745
28.8	6.41146	-0.356563	2.9736	0.317681	-1.06885	-0.223607	-0.575658	1.09208	3.00538	0.0658627	NaN	0.290449	0.639983	-0.813083	1.8857	0.895384	-1.7861	0.684157	-1.87529	1.17559	-0.170205	-0.372131	1.59012	-0.298745	-0.89311	-0.0350845	-0.510083	-0.62025	0	-0.355951	-1.27641	-0.588986	0.0807572	0.214696	-0.324893	1.51456	-0.599642	3.17951	0.513008	0.686644	0.12374	0.303668	-1.53164	-0.505582	-0.446245	1.23031	-1.35261	-0.524255	1.48261
29.1	3.92815	-0.6537	0.270327	0.317681	-0.435458	-0.223607	-1.08359	-0.772449	3.00538	0.724491	NaN	1.61821	-0.608766	-1.66896	-1.3014	1.7283	-0.618714	2.56224	0.618702	0.628806	0.768854	-0.288506	-0.187654	0.298745	-0.412944	0.900503	-0.590411	0.819617	-0.423374	-0.421868	-0.812258	0.898979	0.619139	0.419167	-0.324893	2.89144	0.947821	-0.0240267	-0.575191	-0.57615	0.269316	-0.835087	-1.53164	-1.22784	-0.446245	-1.50372	-0.479959	-0.0530146	-0.687064
29.4	5.50844	-1.24797	1.35164	2.6281	-2.33564	-0.223607	-0.744969	0.292998	3.00538	-0.263451	NaN	0.124478	0.0156095	-0.622888	3.03659	0.895384	-1.7861	3.09883	0.906471	0.902201	-0.404969	0.882244	-0.385185	0.829846	0.355324	-0.152033	0.132541	1.70569	0.282249	1.29197	1.35376	1.51896	0.88833	1.13482	-0.324893	0.596646	-0.599642	-1.94615	-1.66339	-1.0497	-1.62317	-0.202445	-1.53164	-0.746335	1.24225	-1.11314	1.26535	-1.11331	0.0361614
29.7	4.15391	0.237709	0.810983	3.2057	-1.2272	-0.223607	0.270898	-0.239725	3.00538	0.395177	NaN	-0.539404	-1.85751	0.232989	0.911863	0.895384	-2.25305	-0.925625	-0.724217	1.72238	-0.874498	-0.0376313	-0.582715	0.365132	0.739457	1.66067	-0.0281147	1.15189	-0.423374	-0.224118	-0.193395	-0.340992	0.484543	-0.296484	-0.324893	0.367167	-1.76024	-0.504557	-2.28522	-1.68109	-0.458564	1.18937	-1.53164	-0.0240753	-0.687459	-0.331989	-1.35261	0.0647957	-0.506258
[truncated: 188 more columns]

## Sheet: 2E - Data time course Pressers 
	PL	PL	PL	PL	PL	PL	PL	PL	PL	PL	PL	PL	PL	PL	PL	PL	PL	PL	PL	PL	PL	PL	PL	PL	PL	PL	PL	PL	PL	PL	PL	PL	PL	PL	PL	PL	PL	PL	PL	PL	PL	PL	PL	PL	PL	PL	PL	PL	PL
	EXPJF20 1O1	EXPJF20 1O1	EXPJF20 1O1	EXPJF20 1O1	EXPJF20 1O1	EXPJF20 1O1	EXPJF20 1O1	EXPJF20 1O1	EXPJF20 1O1	EXPJF20 1O1	EXPJF20 1O1	EXPJF125 1G2	EXPJF125 1G2	EXPJF125 1G2	EXPJF125 1G2	EXPJF125 1G2	EXPJF125 1G2	EXPJF123 4G2	EXPJF123 4G2	EXPJF123 4G2	EXPJF123 4G2	EXPJF123 4G2	EXPJF123 4G2	EXPJF123 4G2	EXPJF123 4G2	EXPJF123 4G2	EXPJF123 4G2	EXPJF123 4G2	EXPJF123 4G2	EXPJF123 4G2	EXPJF123 4G2	EXPJF123 4G2	EXPJF123 4G2	EXPJF123 4G2	EXPJF166 5M2	EXPJF166 5M2	EXPJF166 5M2	EXPJF166 5M2	EXPJF166 5M2	EXPJF166 5M2	EXPJF166 5M2	EXPJF166 5M2	EXPJF166 5M2	EXPJF166 5M2	EXPJF166 5M2	EXPJF166 5M2	EXPJF166 5M2	EXPJF166 5M2	EXPJF184 8T2
	SPK08a	SPK17a	SPK18a	SPK19a	SPK20a	SPK21a	SPK22a	SPK23a	SPK27a	SPK31a	SPK31b	SPK01a	SPK01b	SPK02a	SPK05a	SPK05b	SPK11a	SPK05a	SPK05b	SPK06a	SPK07a	SPK07b	SPK12a	SPK14a	SPK14b	SPK15a	SPK15b	SPK18a	SPK19a	SPK19b	SPK20a	SPK20b	SPK22a	SPK22b	SPK01a	SPK07a	SPK15a	SPK16a	SPK18a	SPK18b	SPK19a	SPK19b	SPK21a	SPK23a	SPK24a	SPK25a	SPK27a	SPK32a	SPK21a
-30	-0.334158	0.374385	-1.31245	-0.380144	-1.90113	-0.801361	-1.95822	-1.72625	-0.41586	-1.12451	-0.864053	-1.7193	-0.862109	0.154009	-2.4067	-2.2319	-1.0363	-0.469227	0.0941967	3.23845	0.19505	0.99846	-0.793096	-0.748673	-0.828157	-0.512527	-0.81389	-0.834474	0.0849227	-1.27507	-1.92967	0.557196	-0.039317	0.613372	0.803729	0.073481	-0.582681	0.292427	2.92959	0.730794	0.348107	-0.106542	-0.220664	0.678908	-0.397946	-1.18761	0.366881	0.214452	-1.3438
-29.7	-1.26669	-1.18555	-0.293072	-0.672563	0.75161	-0.315687	-1.95822	-1.51951	-1.75735	-0.516665	-0.864053	-1.1089	-1.67351	1.93727	-3.00557	-1.6102	-0.726958	1.19577	0.0244215	1.66639	-0.80288	-0.656447	0.829146	-0.530613	-0.370612	-0.0277043	-0.660326	0.0848618	-0.223887	-0.473598	2.35849	0.33725	-0.039317	0.252565	-0.106153	-1.02873	-0.99158	2.30286	1.83237	-0.540152	0.854445	1.07726	-1.4816	0.363136	-0.848452	-0.107966	0.533646	0.709342	-1.53441
-29.4	-0.800426	1.31035	-0.802763	0.204692	1.4148	-0.801361	-1.95822	-2.13972	-1.6232	-0.820585	-0.864053	-1.31236	-1.06496	0.154009	-3.08043	-0.9885	-1.34565	0.287591	-1.23154	1.66639	-0.893601	0.557152	-2.41534	0.196254	-0.462121	-0.581788	-1.04424	0.0141436	-1.30472	-0.692181	-1.07204	-0.762479	1.00914	0.252565	2.01691	0.073481	-0.378231	-0.43864	1.61292	0.730794	0.474691	1.07726	-0.693515	-0.584176	-0.698284	-0.107966	1.36747	0.874305	-1.91563
-29.1	0.287532	-1.49754	-1.5673	0.497111	-0.795823	2.11268	0.0605633	0.547851	-0.952455	0.243136	-0.864053	-1.92276	-0.253562	-0.49445	-2.70614	-0.615481	-1.96433	1.72554	0.373299	0.408736	-0.621438	-0.435792	-0.432598	-0.457926	-1.01118	-1.27439	-0.42998	-0.127293	-0.0694824	0.0364306	0.398186	1.73024	2.05759	-0.108242	1.71361	-0.906264	0.439566	-0.621407	-0.142639	-1.17563	0.854445	2.0243	-0.220664	0.0473661	-0.247778	2.05134	-0.967232	-0.280437	0.943521
-28.8	1.06464	-0.24959	-1.5673	-0.672563	-0.795823	0.655658	-1.95822	-1.51951	-1.48905	0.0911759	-0.864053	-0.905428	-0.45641	0.802468	-2.18213	-0.491142	-1.96433	2.55804	1.28038	1.03756	-1.07504	-0.435792	1.36989	-0.312553	-0.00457534	-1.13587	-1.12102	0.50917	1.93778	1.20221	0.643224	1.29035	0.747025	0.613372	1.41032	-0.0489871	1.66626	1.02349	0.515696	-1.17563	0.348107	-1.05358	1.98597	-0.899948	-2.19997	-0.647789	-0.133412	-1.60014	-0.771973
-28.5	2.1526	-0.561577	-1.82214	-0.964981	2.74117	0.169986	-1.95822	-1.72625	-2.29394	1.9147	-0.864053	-0.701961	-0.0507124	-0.00810583	-2.93071	-0.491142	-0.417614	0.438954	0.512849	0.723149	0.104329	-0.435792	-0.252348	-0.312553	0.635988	-0.0277043	-0.0460691	-0.905192	0.702542	-1.56651	0.0306295	-0.175957	0.09174	-0.0180404	0.197141	1.05323	-0.378231	-1.71801	3.14904	-0.222415	-0.0316463	-0.106542	0.252187	-1.53149	0.202728	-0.647789	0.0333527	-1.27022	-1.3438
-28.2	-0.178736	0.0623972	2.00054	-0.672563	1.4148	-0.315687	-2.76574	-0.48583	-1.22075	-0.212744	-0.442563	-0.905428	-1.06496	-1.79137	-1.05925	-0.118123	-0.108271	1.57418	0.443074	0.408736	-0.349275	-0.435792	-0.252348	-0.312553	0.544479	-0.374006	-1.04424	-0.480883	-0.532697	-0.327875	-0.827002	1.14372	0.878081	0.162363	-0.712741	0.808289	-0.787131	-1.53524	0.735141	-1.17563	-0.284815	-1.05358	0.409804	-0.584176	-1.5993	1.51151	-0.133412	-0.610363	0.37169
-27.9	-1.57754	0.0623972	-1.82214	-0.672563	-0.353699	-0.801361	-2.36198	-1.31277	-0.818306	0.0911759	-0.864053	-1.31236	-0.862109	-0.980794	-1.35868	0.503576	-1.0363	0.590317	-0.25468	3.23845	-0.0771128	0.888133	0.468648	-0.530613	-0.828157	-1.20513	0.184277	-1.04663	-0.378292	0.473598	-0.704483	1.43698	1.79548	1.33499	1.71361	0.808289	-0.582681	-1.71801	0.735141	0.0953214	-0.917737	0.366978	1.67074	-2.4788	-0.397946	0.43186	-0.633704	-0.775327	1.13413
-27.6	-1.42212	1.31035	-0.547918	-0.380144	0.530548	0.655658	-2.36198	-2.13972	-0.147564	-0.668625	-0.864053	-0.498494	0.354986	-1.62925	-3.52958	-0.366802	-1.65499	1.34713	0.303523	1.03756	-0.439996	-0.656447	2.09089	0.414314	-1.65174	-0.720309	-1.12102	-0.268729	1.16576	0.837903	-0.459446	-0.762479	-0.563545	-0.0180404	-0.106153	0.808289	-1.19603	-1.53524	2.05181	-0.857889	0.348107	-2.47415	1.51312	-0.899948	-1.5993	-2.26727	1.53423	-0.610363	-0.00953019
-27.3	-0.334158	0.0623972	-1.05761	0.204692	-0.574761	2.11268	-1.95822	-2.75993	0.657328	-1.27647	-0.864053	-1.31236	-1.26781	-1.46714	-0.909532	-1.48586	0.201073	2.70941	-0.184905	-0.848914	-0.167834	-0.215138	-0.252348	-1.18479	0.727497	-0.789569	-0.42998	0.862761	-1.30472	0.0364306	-0.459446	0.997088	-0.301431	-1.19066	1.10702	0.195949	1.66626	-0.255873	1.39348	-2.44657	2.75321	2.26106	0.0945699	0.0473661	0.95357	-0.107966	0.533646	0.049489	1.51535
-27	-0.489581	0.686372	-1.31245	0.497111	0.530548	1.62701	-1.15071	-0.899302	-0.550009	-1.88431	-0.864053	-2.12623	-1.67351	0.478239	-1.28383	0.627916	0.201073	1.19577	0.443074	-1.47774	-1.43793	-1.87004	-0.0720999	0.923121	0.269952	-0.374006	-0.42998	1.21635	1.32016	-0.109292	-0.949521	1.14372	-2.26728	-1.28086	-0.712741	-1.64107	-0.582681	-0.98694	-1.45931	-0.540152	-1.04432	0.366978	0.409804	-2.4788	-0.698284	0.971685	-0.46694	-0.115474	-0.00953019
-26.7	0.132109	0.374385	-1.31245	-0.964981	0.530548	-0.801361	-2.76574	-2.55319	0.657328	-0.668625	-0.864053	1.33271	-1.47066	0.802468	-1.13411	0.876595	0.819762	0.363272	-0.045354	1.9808	-0.80288	-1.53906	-1.69434	0.559687	-0.736648	-1.89774	-0.42998	0.438452	-0.687102	0.255014	0.888262	-0.029326	-0.563545	-0.559251	0.500436	-1.1512	-0.378231	-0.804174	0.954586	0.0953214	-0.791152	-1.05358	-0.220664	-1.21572	0.503064	3.13098	0.533646	-0.445401	-0.200141
-26.4	1.22007	0.374385	-1.05761	1.08195	0.0884244	-0.801361	-2.76574	-0.48583	-0.818306	-0.516665	-0.864053	-1.31236	-0.253562	3.88265	-1.88269	1.12527	1.74779	-0.998999	-0.464007	-1.16333	-1.16576	-0.987428	-2.23509	-0.675986	-1.10268	-0.651048	1.64314	-0.622319	-0.532697	-0.983625	1.37834	-0.469218	-1.08777	-1.37107	0.803729	-1.1512	1.66626	-0.43864	-1.67875	-2.76431	-1.29749	-1.05358	0.567421	-1.84726	-0.698284	0.43186	-0.46694	-1.43518	-0.581362
-26.1	0.598376	-0.561577	-1.05761	-0.964981	-0.132638	-0.801361	-1.95822	-1.31277	1.19392	0.395096	-0.864053	-0.295027	-0.253562	3.07208	-2.93071	0.379236	0.510418	-1.30173	0.6524	-0.848914	-1.16576	-0.766773	1.18964	-1.62091	-1.19419	-2.17478	-1.42815	-0.198011	2.401	-0.910764	-0.581964	-0.835794	-1.21883	-1.28086	-0.106153	0.318417	-0.787131	0.65796	-0.800975	0.413057	-2.057	-0.816823	-0.220664	0.0473661	-1.89963	0.971685	-0.800468	-1.93007	-1.3438
-25.8	-0.489581	0.99836	-0.0382264	-0.964981	0.309486	0.169986	-1.95822	-0.692566	1.19392	1.9147	-0.864053	-2.53316	-1.06496	-0.00810583	0.0636298	-0.118123	0.510418	-1.37741	-0.394231	-0.220089	-1.3472	-2.31135	-1.33384	-1.76629	-0.645139	-1.68996	-1.1978	-0.410165	-0.378292	-1.71224	-1.92967	-1.56895	-1.21883	-2.36328	-0.712741	-0.0489871	0.644016	2.30286	-1.02042	1.684	1.61395	0.130218	-1.00875	0.0473661	-1.14879	-0.647789	-0.300175	-0.94029	-0.962583
-25.5	1.22007	0.0623972	-0.0382264	0.204692	-0.795823	0.169986	-1.55447	-1.51951	1.32807	0.699016	-0.864053	-0.905428	-1.26781	2.74785	-1.58326	-0.9885	2.67583	-0.393545	-1.09199	0.723149	-0.530717	-1.75972	-1.51409	-2.05703	-0.55363	-1.967	-1.1978	0.0848618	-0.378292	-0.400736	-0.949521	-1.71558	-0.956716	-1.46127	-0.409448	0.563353	-0.99158	-0.621407	-0.142639	-0.540152	1.74054	-2.00063	-1.16637	1.31045	-1.74946	-1.18761	1.03394	-0.775327	0.562301
-25.2	-0.178736	0.374385	0.981155	0.204692	0.75161	-0.801361	-2.76574	-0.692566	0.254882	0.0911759	-0.864053	-1.92276	-0.45641	-0.170221	-0.310663	1.00093	2.67583	-1.37741	-1.09199	-1.16333	-0.167834	-1.53906	-2.05484	1.72267	0.361461	-0.0969646	-0.42998	0.0848618	0.548137	-2.1494	-0.214408	-0.689163	-1.08777	-0.649452	-1.31933	0.563353	-0.378231	0.10966	0.296251	0.413057	0.981029	0.366978	-0.851131	-0.899948	-0.397946	-1.18761	0.200117	0.049489	0.943521
-24.9	-0.0233135	-1.49754	-0.802763	0.497111	-1.68007	-0.315687	-1.95822	-1.51951	1.32807	-0.972545	-0.864053	-2.3297	-1.26781	1.1267	-1.65812	0.00621712	1.43845	-1.68013	-0.045354	0.723149	-0.893601	-1.98037	0.288399	-0.0944928	-1.37721	-1.55143	-1.35137	0.226298	-0.995912	-2.36799	-0.827002	-1.12906	-0.563545	-1.10046	-1.01604	-0.171455	-0.582681	0.292427	0.735141	-0.540152	-0.411399	3.91838	-0.851131	-1.84726	0.803402	-0.107966	-1.134	0.214452	-0.390751
-24.6	1.06464	-1.49754	-0.802763	-0.380144	0.530548	0.169986	-2.36198	-3.38014	-1.48905	1.1549	-0.864053	-2.12623	-1.26781	1.1267	-2.48156	1.12527	1.74779	-0.0151363	-1.37109	0.408736	-1.3472	-0.766773	-1.15359	0.487001	-1.74325	-1.34365	-0.353198	0.15558	0.856948	0.983625	1.1333	0.117304	-2.00517	-2.00248	-1.01604	0.318417	-1.40048	-0.0731069	1.39348	-0.857889	-1.04432	0.603739	-0.851131	-2.79457	-0.998621	-0.647789	0.366881	-0.610363	0.943521
-24.3	-1.26669	-0.873564	-0.293072	-0.672563	0.309486	-0.315687	-1.95822	-3.38014	-1.6232	1.00294	-0.864053	-1.51583	-2.0792	-1.30502	-1.5084	-0.864161	2.67583	0.211909	-0.603557	-0.534501	-1.52865	-1.42874	0.648897	-1.18479	-0.919667	0.387859	-0.42998	0.15558	-0.0694824	-1.34793	0.398186	0.043989	-1.08777	-1.19066	-1.31933	-0.538859	-1.60493	1.38903	0.515696	0.413057	-0.917737	0.366978	1.82836	-0.268405	-0.247778	-2.26727	-0.300175	3.51371	-0.581362
-24	-0.800426	0.374385	-2.07699	-1.2574	3.84647	-0.801361	-1.15071	-1.31277	-2.02564	-0.668625	-0.864053	-1.1089	-0.0507124	-0.49445	-1.05925	-0.366802	1.12911	-1.07468	-0.324456	-0.848914	-0.984321	-0.325465	-0.612847	-1.33017	-1.10268	-1.48217	-1.81206	0.438452	-1.76794	-1.56651	-1.92967	-0.689163	-1.48094	-1.10046	-0.106153	-1.27367	0.0306672	-0.804174	-0.800975	-0.857889	-1.17091	0.366978	-0.220664	-0.584176	-0.397946	-2.26727	-1.46753	1.69912	2.08718
-23.7	-0.800426	-0.24959	0.471464	-1.54982	-0.574761	0.169986	-0.746951	-0.0723576	-1.75735	-1.42843	-0.864053	-0.498494	-1.26781	-1.46714	-2.25699	0.254896	-0.417614	-1.15036	-1.09199	-0.534501	-0.439996	-1.42874	-2.05484	-1.62091	-1.46872	-0.512527	-0.660326	0.297016	-0.532697	-1.85796	-1.19456	-1.20237	-1.21883	-1.55147	-0.106153	-0.0489871	1.05291	0.10966	-1.02042	-0.540152	-0.537984	-0.106542	1.19789	-0.268405	0.352896	-0.647789	-0.300175	2.19401	-0.00953019
-23.4	-0.645003	1.31035	-1.31245	-0.672563	-2.56432	-0.801361	-0.746951	-1.10604	-1.48905	0.243136	-0.864053	-1.51583	-0.45641	0.154009	-0.984391	0.130557	-0.108271	-1.45309	0.163972	0.408736	-0.80288	-1.42874	0.108149	-0.748673	0.269952	-1.48217	-1.35137	0.579889	-1.76794	-0.765042	-0.214408	0.410565	-1.21883	-1.73187	-0.712741	0.195949	-0.173782	-0.0731069	-0.142639	-1.49336	-1.29749	-1.5271	-0.220664	-0.899948	0.202728	-1.72744	-1.96782	-0.775327	0.37169
-23.1	-0.955848	0.0623972	-0.293072	-0.380144	-1.01688	-0.315687	-2.36198	-0.48583	-1.22075	-1.27647	-0.864053	-0.0915603	-1.06496	-0.81868	-2.55642	0.379236	0.201073	-1.8315	-2.06884	0.0943233	-1.25648	-1.87004	-0.612847	-1.40285	-2.65834	-2.24404	-0.737108	-1.68309	-2.07675	0.109292	-1.31708	-0.615848	-2.92257	-2.09268	-1.01604	-0.538859	0.644016	0.10966	-1.45931	1.04853	-0.664568	-1.29034	0.882655	0.678908	-1.74946	-1.18761	-0.633704	0.544378	1.51535
-22.8	-1.42212	0.99836	-1.05761	2.25162	-0.795823	-0.315687	-1.55447	0.134379	-0.684158	-1.27647	-0.864053	1.12924	0.354986	0.154009	-2.03241	0.379236	0.201073	-0.469227	-0.25468	0.0943233	-0.258554	-1.98037	-2.77584	-3.29271	-1.01118	-1.82848	-1.27458	-0.834474	0.393733	-0.692181	0.275667	-0.542533	-1.74306	-1.10046	-1.01604	0.685821	-0.173782	-0.98694	-1.23986	-0.222415	-0.791152	2.97134	-0.535898	-1.21572	1.40408	2.59116	-0.633704	-1.43518	0.943521
-22.5	1.53091	0.374385	-0.547918	0.204692	-0.132638	-0.315687	-2.36198	-0.48583	4.27934	0.0911759	-0.864053	1.73964	0.760684	-2.76406	-1.5084	0.130557	-0.417614	-2.05854	-0.882659	-0.848914	-1.71009	-0.546119	-1.15359	-2.63853	-1.19419	-1.82848	-1.42815	-1.82453	-1.30472	-1.49365	-1.56212	-0.982424	-0.694602	-1.10046	-1.01604	1.05323	1.25736	3.58223	-1.45931	-1.8111	-0.664568	1.55078	0.567421	-0.899948	-1.44913	-0.107966	-0.633704	0.214452	-1.15319
-22.2	-0.489581	0.686372	-1.31245	1.08195	1.85692	1.62701	0.0605633	-1.72625	0.523179	-0.820585	-0.864053	2.14658	0.760684	1.93727	-2.33185	-0.118123	-0.108271	-2.51263	-1.65019	-0.848914	-0.258554	-0.877101	-2.59559	-0.38524	-1.19419	0.387859	-0.81389	-0.268729	-0.841507	-2.29513	0.275667	-0.762479	-0.301431	-0.469049	-0.712741	-1.27367	-1.40048	1.02349	0.0768055	-0.222415	-0.917737	0.8405	-1.32398	0.0473661	-1.14879	-0.647789	0.700409	-0.280437	0.562301
-21.9	1.06464	-0.24959	-0.547918	-0.964981	0.530548	0.169986	-1.55447	-1.93298	0.791477	5.10586	-0.864053	-0.701961	-0.862109	-1.46714	-2.63128	0.130557	0.510418	-2.73968	-1.85952	0.0943233	-0.621438	0.00551636	-2.77584	-1.18479	0.45297	-0.92809	-1.04424	-1.54166	-2.69437	-1.71224	-0.214408	-2.15547	-1.34989	-1.46127	-1.31933	-0.906264	-0.378231	0.292427	1.61292	-0.222415	-0.0316463	0.366978	-0.220664	0.994679	-0.397946	-1.18761	-0.633704	-0.94029	0.752912
-21.6	2.61887	0.374385	-0.0382264	0.78953	0.0884244	2.59835	-0.343195	-2.75993	2.13296	0.850977	-0.864053	-1.7193	-1.06496	-1.14291	-0.610098	0.00621712	-0.726958	-1.15036	-1.65019	-1.16333	-1.25648	-1.75972	-2.05484	-1.47554	-0.828157	-3.14442	-1.35137	-0.834474	-2.07675	-0.983625	-0.704483	-1.93552	-2.26728	-1.82207	-1.01604	-0.0489871	0.644016	-1.35247	-0.142639	-1.49336	1.48737	1.07726	-0.851131	-1.84726	-0.998621	0.43186	-0.46694	-1.43518	-0.00953019
-21.3	-0.800426	-0.561577	-1.31245	-0.0877252	-1.23795	1.62701	-1.95822	-1.72625	-0.013415	0.547057	-0.864053	-2.73663	-0.65926	-0.00810583	-2.33185	-0.491142	-0.108271	-2.20991	-0.324456	-0.534501	-0.80288	-1.75972	-2.41534	-2.34778	-0.645139	-2.59034	-1.88884	-0.97591	-1.15032	-2.22226	-1.19456	-1.12906	-1.34989	-1.28086	-1.01604	0.685821	-0.173782	0.475194	-0.142639	-0.222415	-0.537984	-0.343302	-1.00875	-0.268405	2.30509	-0.647789	-0.967232	-0.610363	-0.390751
-21	-1.11127	1.31035	0.726309	-0.0877252	1.19373	0.169986	-1.95822	-0.48583	1.73052	-2.18823	-0.864053	0.315374	0.760684	-0.81868	-0.385522	-0.864161	0.510418	-1.68013	-0.184905	2.29521	-0.167834	0.336498	-1.87459	-0.748673	-0.828157	-1.20513	-2.27275	-0.622319	0.0849227	-0.692181	-0.459446	-0.395902	1.40231	1.24478	-1.31933	0.318417	-0.173782	0.292427	0.954586	-0.222415	-0.537984	2.26106	-1.79683	-1.21572	0.052559	2.59116	-1.80105	0.214452	0.562301
-20.7	-1.57754	0.374385	-0.547918	-0.672563	-0.353699	-0.801361	0.464321	1.58153	0.657328	-0.820585	-0.864053	1.12924	0.963534	-0.332335	-1.88269	0.254896	1.12911	-0.696272	-0.743108	-0.848914	-0.0771128	-1.42874	-2.05484	-2.20241	0.45297	-0.99735	-1.04424	-0.622319	-1.92234	-1.42079	0.398186	0.043989	-1.08777	-0.108242	-1.31933	-0.293923	0.644016	1.93733	1.83237	-2.12883	-2.057	1.78754	-0.220664	2.25776	-1.14879	0.971685	-0.300175	-0.280437	-0.390751
-20.4	-1.57754	0.374385	0.471464	-0.380144	1.63586	-0.315687	-1.55447	0.547851	0.523179	0.547057	-0.864053	2.14658	1.36923	-0.980794	-1.20897	0.503576	0.819762	-1.22604	-1.16176	-2.73539	-0.893601	-1.09775	-0.0720999	-2.12972	-0.736648	-2.17478	-0.737108	-1.82453	-1.76794	-2.65943	0.0306295	-1.49563	-2.66046	-1.19066	-1.31933	-1.02873	-0.173782	0.840727	3.80737	-0.540152	-2.94309	1.07726	-0.693515	0.363136	-1.29896	0.971685	-0.967232	0.709342	-1.15319
-20.1	-1.73296	0.686372	0.216618	-0.964981	2.29904	-0.315687	-1.15071	-2.34646	-0.818306	0.850977	-0.442563	-0.905428	0.152137	0.640353	-1.13411	0.503576	0.201073	-1.37741	-1.30131	-1.16333	-1.43793	-2.0907	-1.15359	-0.821359	0.361461	-1.89774	-0.737108	-0.693038	-0.223887	-1.12935	0.0306295	-1.05574	0.09174	-1.19066	-1.01604	-0.171455	0.235117	2.30286	2.05181	0.730794	-2.68992	-0.343302	-0.535898	-0.899948	-1.14879	-2.26727	-1.30076	-2.25999	-0.390751
-19.8	-1.26669	0.686372	-0.293072	-0.380144	-0.574761	-0.315687	-1.95822	-2.34646	-0.818306	-0.972545	-0.864053	0.111907	-0.45641	-0.81868	-1.05925	0.254896	-0.108271	-1.75582	0.233748	1.35198	-0.167834	-1.87004	-0.612847	1.06849	0.361461	0.803421	-0.122851	0.367734	2.09219	-0.765042	0.398186	1.21703	1.40231	-0.108242	-1.31933	-0.906264	0.235117	1.20626	3.36848	0.0953214	-0.284815	3.68162	0.725038	0.994679	0.352896	-1.72744	1.86776	-1.43518	-0.581362
-19.5	-1.88838	0.99836	0.471464	-0.964981	-0.353699	1.14133	-0.343195	-0.899302	-1.3549	0.0911759	-0.864053	1.12924	-1.06496	-3.08829	-1.05925	-0.366802	-0.417614	-1.68013	0.443074	0.0943233	-0.0771128	-1.31841	-0.252348	0.268941	-0.279103	-0.720309	-0.122851	-0.693038	0.0849227	1.49365	0.0306295	-0.322587	-0.170374	-1.01026	-1.31933	-0.416392	-0.582681	0.65796	3.80737	0.413057	-0.284815	0.8405	-1.16637	5.73124	-0.998621	0.43186	1.36747	0.049489	0.37169
-19.2	-1.57754	0.0623972	0.216618	-0.380144	0.530548	1.62701	2.88687	-0.692566	-1.3549	0.0911759	-0.864053	-0.701961	0.760684	-1.30502	0.363064	-0.739821	0.201073	-0.317863	-0.184905	1.35198	0.830096	-0.546119	0.288399	-0.894046	1.09353	0.734161	2.41096	0.579889	0.393733	0.255014	-0.459446	-0.762479	-0.039317	1.06438	-0.712741	-1.1512	0.235117	0.475194	4.02682	-1.8111	-1.67724	1.31402	-0.535898	1.31045	-0.848452	-0.647789	-0.133412	1.69912	-0.200141
-18.9	0.598376	-0.561577	-0.0382264	0.204692	-0.132638	-0.315687	-1.15071	0.341114	-0.013415	-0.0607839	-0.864053	-1.1089	1.36923	-0.00810583	0.812216	0.627916	0.819762	-1.07468	0.443074	1.9808	1.10226	-1.20808	-2.41534	0.850434	1.00202	0.59564	-0.0460691	0.0141436	0.856948	-0.61932	-0.214408	-0.689163	-0.039317	-0.198444	1.71361	-0.538859	-0.173782	0.65796	3.58793	0.730794	-1.80383	1.07726	0.567421	0.363136	-0.247778	-0.107966	0.200117	0.709342	0.943521
-18.6	-0.800426	2.24631	-0.293072	0.204692	2.5201	1.14133	2.88687	-0.899302	-0.684158	0.0911759	-0.864053	-0.0915603	0.760684	1.61304	0.437923	-0.491142	2.36648	-0.0151363	-0.045354	-0.220089	-0.893601	-0.435792	-0.432598	0.850434	1.36806	-0.581788	0.64497	0.226298	1.47457	0.765042	0.888262	-0.835794	0.222797	0.0721614	-1.31933	0.440885	-0.787131	1.75456	3.80737	-0.857889	-0.664568	1.31402	0.252187	0.994679	-0.848452	0.43186	-0.133412	0.544378	0.18108
-18.3	0.287532	-0.561577	-1.05761	0.78953	0.309486	-0.801361	4.5019	-0.48583	-1.3549	-1.42843	-0.864053	-0.701961	-1.67351	1.28881	-1.95755	0.876595	1.74779	-1.45309	-0.603557	0.408736	1.01154	-0.215138	2.27114	2.01342	2.10013	0.941942	-0.353198	0.438452	-0.223887	0.327875	0.0306295	0.923772	1.40231	-0.108242	-1.01604	0.930757	-0.582681	-0.255873	1.17403	1.684	-0.0316463	2.49782	-1.16637	-0.899948	0.052559	-0.107966	-0.800468	1.53416	-2.10625
-18	-0.0233135	0.99836	-1.5673	-0.0877252	2.29904	0.169986	1.27184	-1.93298	-1.0866	0.0911759	-0.864053	-1.51583	0.152137	3.39631	-0.909532	0.627916	1.74779	-0.696272	-0.045354	1.35198	0.19505	-1.09775	0.829146	0.414314	-0.370612	0.180077	-0.353198	-0.410165	2.24659	-0.400736	0.398186	2.17013	0.222797	0.342766	-1.31933	1.17569	0.0306672	1.38903	2.71015	1.04853	1.2342	2.0243	-1.32398	1.31045	0.052559	-0.647789	0.533646	1.20423	1.70596
-17.7	-0.800426	0.0623972	-0.802763	-1.54982	1.63586	1.14133	1.67559	-1.72625	-1.6232	0.0911759	-0.864053	0.315374	-0.253562	2.09939	-2.18213	0.130557	0.510418	-0.923317	0.163972	-0.534501	1.01154	-0.215138	0.108149	0.487001	1.82561	0.6649	-0.583544	1.64066	0.702542	1.71224	0.153148	0.923772	0.747025	0.974179	-0.712741	0.073481	0.0306672	-0.804174	2.27126	2.95495	-0.537984	1.78754	0.725038	-0.584176	0.95357	-2.26727	-0.46694	0.379415	-0.00953019
-17.4	-0.645003	0.374385	1.236	0.204692	-0.353699	1.14133	-0.746951	-0.692566	-1.6232	0.243136	-0.864053	0.518841	-0.862109	1.45093	-1.43354	0.752255	0.201073	2.86077	0.791951	1.66639	1.01154	1.21911	-0.432598	1.94073	2.55768	-0.512527	1.02888	0.933479	1.16576	1.27507	1.86841	0.703826	1.27125	0.883977	1.41032	-0.416392	-1.19603	0.840727	2.92959	-1.17563	-1.17091	1.55078	-1.63922	2.57353	-0.247778	-2.80709	0.867174	1.36919	-0.200141
-17.1	-0.178736	-0.561577	0.216618	0.204692	-2.78538	-0.801361	-1.15071	1.58153	-1.22075	1.00294	-0.864053	-1.51583	-0.253562	-1.46714	-0.0112288	0.503576	2.67583	-0.62059	0.0941967	2.29521	1.55586	0.557152	-0.252348	2.52223	1.82561	3.08902	1.33601	-0.268729	0.239328	-0.255014	1.99093	1.29035	1.1402	1.8762	2.01691	-1.27367	0.0306672	-0.98694	1.17403	-1.49336	-1.67724	3.2081	-0.851131	-0.899948	0.653233	-1.72744	1.53423	2.02905	1.13413
-16.8	0.909221	-1.18555	1.236	1.9592	-0.795823	-0.801361	-1.95822	-1.51951	-1.22075	0.547057	-0.864053	-0.905428	-0.0507124	-0.980794	-1.35868	1.12527	1.43845	-0.696272	-1.23154	-0.848914	1.19298	-1.09775	-1.87459	1.35924	0.819007	-0.0277043	1.41279	-1.18806	0.548137	0.182153	0.765743	-0.102641	-0.039317	-0.0180404	-0.106153	-0.538859	-0.378231	0.65796	1.17403	0.0953214	-0.284815	3.2081	0.0945699	-0.899948	1.70441	-1.18761	1.2007	1.36919	1.51535
-16.5	-0.489581	-0.873564	0.471464	0.497111	2.74117	-0.315687	-1.55447	-0.279094	-0.41586	-0.668625	-0.864053	-2.53316	-1.87636	1.93727	-0.759815	0.130557	1.74779	0.968726	0.163972	-1.47774	-1.16576	0.00551636	-0.252348	0.487001	-0.736648	-0.720309	-0.737108	0.0848618	1.47457	1.93082	0.643224	0.630511	1.79548	0.252565	-0.409448	0.318417	0.235117	0.292427	1.61292	0.413057	-0.664568	2.26106	0.252187	-0.584176	1.70441	4.21064	0.533646	2.52394	0.562301
-16.2	-0.489581	-0.24959	-2.07699	-0.672563	1.85692	1.14133	0.0605633	-2.13972	0.925625	-0.668625	-0.864053	-1.7193	-1.47066	1.45093	-1.65812	0.130557	2.36648	-0.469227	1.07105	-1.16333	-1.98225	-1.75972	-0.973346	-1.33017	0.178443	-1.41291	-0.583544	-0.622319	-0.532697	0.0364306	-0.214408	-1.56895	-0.956716	-1.91228	-1.01604	-0.171455	0.439566	-0.43864	2.27126	1.04853	-1.04432	0.366978	-0.378281	0.994679	-1.14879	0.971685	2.20129	1.53416	-0.200141
-15.9	0.909221	-0.24959	-0.0382264	1.9592	3.18329	-0.801361	0.0605633	0.134379	-1.0866	-1.58039	-0.864053	-0.905428	-0.45641	-1.14291	0.213347	0.752255	-0.108271	-0.1665	-0.394231	-1.16333	-1.3472	-2.31135	1.18964	-0.675986	0.269952	-1.34365	-0.276416	-0.198011	0.0849227	0.255014	-0.581964	-0.909109	-1.08777	-0.739654	-0.106153	-0.538859	-0.173782	0.840727	0.296251	2.63721	-1.29749	2.26106	-0.220664	3.20508	-0.247778	1.51151	0.700409	3.18379	-0.962583
-15.6	-0.489581	1.62233	1.236	0.497111	-0.353699	1.14133	-0.746951	0.961323	-1.6232	-1.88431	-0.864053	-1.1089	1.16638	0.478239	-0.984391	-0.491142	0.510418	0.287591	0.722176	0.0943233	-2.6173	-1.87004	-0.612847	-0.894046	-1.2857	-1.75922	-0.81389	-0.339447	-0.687102	-0.692181	0.643224	-0.029326	-0.825659	-1.82207	-0.409448	-0.171455	1.25736	1.75456	0.735141	0.413057	-0.411399	-0.106542	1.67074	0.0473661	0.052559	4.75046	-0.800468	2.02905	-0.200141
-15.3	-1.26669	0.99836	-1.82214	-1.2574	0.75161	0.655658	-1.55447	-0.692566	-0.550009	0.243136	-0.864053	0.315374	-0.65926	0.640353	0.288206	1.00093	2.05714	-1.37741	-1.30131	-1.79215	-1.89153	-1.64939	-1.69434	-1.03942	-1.10268	-2.72886	-1.12102	-0.763756	0.548137	-1.27507	-1.07204	-2.52205	-2.66046	-2.00248	-0.106153	-0.293923	-0.173782	1.20626	0.296251	0.730794	1.48737	0.366978	3.24691	-0.584176	-1.14879	0.43186	-0.46694	2.19401	-0.962583
-15	1.99718	-0.561577	-0.0382264	0.78953	-0.353699	-0.315687	-2.76574	-2.96666	-0.013415	0.395096	-0.864053	-0.0915603	-2.4849	1.61304	1.33623	0.130557	2.67583	-0.242182	0.582625	-2.10657	-1.07504	-1.98037	-1.33384	-0.167179	1.00202	0.249338	-0.42998	-0.0565745	-0.841507	-0.546458	-1.92967	-1.71558	-0.825659	-2.18288	-0.409448	0.440885	-0.173782	0.10966	1.17403	1.684	1.86712	1.55078	2.93167	-0.268405	0.052559	0.971685	0.200117	0.709342	0.18108
-14.7	-0.489581	0.374385	-0.547918	0.497111	2.74117	0.169986	-1.95822	-2.96666	-0.281712	-0.212744	-0.864053	-2.3297	-1.06496	-0.980794	-0.909532	0.627916	0.819762	-0.393545	0.0941967	3.86728	-0.439996	0.00551636	-2.59559	-1.03942	0.178443	-1.06661	-0.353198	-0.622319	0.856948	-0.692181	-0.949521	0.043989	-0.432488	-0.108242	-1.01604	-0.293923	-0.173782	0.65796	-0.142639	0.730794	-0.411399	3.91838	0.567421	0.678908	1.55424	0.971685	0.200117	1.36919	1.51535
-14.4	0.132109	0.374385	-0.0382264	-0.0877252	3.40435	1.14133	-1.15071	-1.31277	0.523179	0.0911759	-0.864053	-1.31236	-0.45641	-1.95348	-0.310663	1.00093	2.36648	-1.98286	-0.812884	1.9808	-0.893601	-0.435792	-0.612847	-1.11211	0.910516	-0.374006	-0.660326	-0.480883	-0.841507	-2.36799	-0.949521	-1.27569	-0.956716	-2.09268	-0.712741	0.440885	-0.378231	0.10966	2.05181	0.0953214	0.601276	0.366978	2.30121	0.994679	0.202728	1.51151	0.366881	0.709342	0.752912
-14.1	3.39598	2.87028	-0.547918	-0.380144	1.4148	0.169986	-0.746951	-0.0723576	1.99881	-0.972545	-0.864053	0.925775	-0.45641	-1.14291	2.00995	1.49829	2.05714	-0.771953	-0.952435	-0.534501	-1.16576	-1.20808	-0.973346	-1.25748	2.83221	-0.99735	0.261059	-0.763756	-1.45913	-1.12935	-0.704483	-0.835794	-1.87411	-1.91228	0.500436	0.563353	0.848465	0.10966	2.05181	1.04853	-0.284815	1.55078	1.19789	-0.899948	1.55424	0.43186	-0.46694	0.214452	-1.3438
-13.8	4.32851	0.374385	-0.293072	-0.0877252	3.40435	-0.801361	-1.95822	-1.72625	3.3403	-1.42843	-0.864053	-1.51583	0.354986	-0.656565	-1.13411	0.00621712	2.98517	0.0605455	0.443074	-0.220089	-1.3472	-1.42874	-0.0720999	-1.25748	0.0869335	-1.89774	-1.35137	-1.3295	-0.378292	0.400736	-0.336927	-1.78889	-1.21883	-1.91228	-1.31933	-0.661327	-0.582681	-0.255873	-0.800975	-1.8111	0.0949382	-1.76386	1.82836	-0.268405	1.10374	-0.107966	-0.633704	1.36919	0.752912
-13.5	-0.645003	0.0623972	-1.31245	0.497111	-1.01688	0.655658	-2.36198	-1.72625	0.523179	-1.58039	-0.864053	-1.51583	-0.0507124	-0.81868	0.512782	0.130557	-0.417614	-0.1665	-0.464007	1.9808	-1.89153	-1.53906	-0.612847	-2.05703	-1.65174	-1.62069	-0.660326	-1.04663	-0.841507	-0.692181	-0.459446	-2.00884	-3.70891	-1.73187	-0.712741	0.073481	0.235117	-0.0731069	0.0768055	1.04853	-0.664568	2.49782	3.56214	-1.53149	0.352896	0.971685	-0.800468	-0.280437	0.37169
-13.2	-1.11127	1.62233	-1.5673	-0.380144	0.0884244	0.655658	-0.746951	-2.55319	0.120734	-1.88431	-0.864053	-0.0915603	0.152137	0.802468	-1.95755	-0.242462	-0.417614	0.363272	-0.464007	1.66639	-0.712159	-1.20808	-1.69434	-0.821359	2.00863	-1.20513	-1.42815	-0.834474	0.702542	-0.692181	0.398186	-1.27569	-2.00517	-1.55147	-1.01604	-0.171455	-0.582681	-0.43864	-0.581529	-1.8111	-0.284815	-1.29034	0.567421	0.678908	0.503064	0.43186	1.2007	0.379415	-0.200141
-12.9	-1.26669	0.99836	0.981155	-0.380144	0.309486	-0.315687	-1.55447	-1.72625	-0.147564	-0.364704	-0.864053	-1.31236	-0.253562	0.802468	0.138488	0.00621712	0.510418	-0.090818	0.0244215	-0.534501	-1.43793	-1.31841	-1.51409	-0.457926	0.269952	-2.03626	0.184277	-1.3295	-0.841507	-0.765042	-1.19456	-1.05574	-1.34989	-0.649452	-0.712741	1.05323	0.848465	1.02349	1.83237	-0.222415	1.10761	-0.816823	-0.535898	1.31045	0.653233	-0.107966	0.700409	-0.775327	-0.771973
-12.6	-1.73296	3.18227	-0.293072	-0.964981	-0.574761	-0.801361	-1.15071	-1.93298	0.523179	-0.972545	-0.442563	-0.295027	0.354986	0.316124	-1.88269	0.752255	2.67583	-0.317863	0.0244215	0.0943233	-1.61937	-1.31841	-1.15359	-0.38524	0.178443	-0.0969646	-0.42998	0.367734	1.16576	0.0364306	-0.091889	-1.42232	-0.694602	-1.19066	-0.106153	0.318417	-0.582681	-0.0731069	0.735141	0.730794	1.36078	-0.106542	0.882655	1.94199	-0.0976097	-0.647789	1.03394	-0.115474	1.32474
-12.3	-1.57754	0.374385	0.471464	-1.2574	-0.795823	-0.801361	-1.15071	-0.48583	0.389031	-0.364704	-0.864053	-0.498494	-0.862109	-1.14291	-1.13411	0.254896	2.67583	0.287591	0.931502	-1.79215	-0.621438	-1.09775	-0.252348	1.43193	1.91712	-0.374006	-0.353198	0.297016	1.32016	0.0364306	-0.581964	-0.175957	-0.432488	-0.649452	-1.01604	-1.02873	0.235117	1.93733	-0.581529	-0.222415	2.24687	2.49782	2.14359	0.678908	0.653233	2.05134	0.867174	0.049489	-0.771973
-12	-0.645003	0.686372	-0.293072	-0.0877252	3.62541	0.169986	-0.746951	-0.692566	0.120734	-0.0607839	-0.442563	0.111907	0.354986	0.478239	2.45911	-0.118123	1.74779	-0.771953	-0.464007	-2.42098	-1.43793	-0.435792	-1.87459	-0.239866	0.544479	-1.82848	0.107495	-0.0565745	0.856948	0.400736	0.520705	-0.175957	0.09174	-0.829856	-1.01604	-1.39614	-1.40048	-0.43864	0.0768055	-1.17563	1.2342	2.0243	1.67074	-0.899948	-0.0976097	1.51151	-0.133412	2.52394	0.18108
-11.7	-1.88838	0.686372	0.981155	-0.672563	0.0884244	2.11268	1.67559	-0.279094	-1.22075	-0.972545	-0.864053	-0.701961	0.354986	-0.170221	2.00995	-0.366802	0.201073	0.665999	0.303523	-1.79215	-0.893601	-0.987428	0.288399	0.559687	0.269952	-1.41291	-0.353198	0.367734	1.47457	-0.61932	1.25582	-0.689163	-0.825659	-0.559251	0.197141	-0.416392	-0.99158	1.20626	1.39348	-1.49336	1.36078	1.55078	2.30121	2.88931	-0.247778	-0.107966	-0.46694	-0.115474	-0.581362
-11.4	-0.800426	-1.18555	1.236	-0.672563	-0.353699	0.169986	-0.343195	-1.72625	-2.15979	0.0911759	-0.864053	-0.295027	-0.253562	-0.980794	-1.58326	0.876595	1.12911	-0.696272	0.861727	0.0943233	-0.984321	0.115844	0.648897	-1.03942	-1.01118	-2.24404	-0.967455	-0.0565745	1.32016	-0.182153	0.520705	0.410565	-2.00517	-1.37107	-0.712741	0.808289	2.07516	0.840727	-0.581529	0.413057	1.10761	2.49782	0.409804	-1.84726	-0.998621	0.43186	-1.134	-1.60014	-0.390751
-11.1	-1.57754	-0.561577	0.981155	-0.672563	-0.132638	-0.315687	0.0605633	-1.51951	-1.22075	-1.73235	-0.864053	-1.7193	-0.65926	1.1267	-1.28383	-0.242462	1.43845	-0.544908	-0.184905	-3.0498	-1.89153	-1.42874	0.288399	-1.18479	-1.83476	-2.3133	-1.35137	-0.905192	-0.0694824	-1.20221	1.01078	-1.05574	-2.13623	-1.46127	-0.712741	1.05323	0.235117	-1.16971	0.296251	1.04853	1.74054	1.07726	0.725038	-2.16303	0.95357	2.05134	0.700409	0.049489	0.752912
-10.8	-1.11127	0.374385	0.471464	0.204692	-2.34325	-0.315687	0.464321	-0.0723576	-2.15979	1.45882	-0.864053	-1.7193	1.57208	0.640353	-0.46038	-0.242462	2.05714	0.0605455	0.931502	-1.47774	-0.258554	-1.75972	-1.33384	-0.167179	0.727497	-1.06661	-0.276416	0.0141436	0.856948	-0.182153	-0.214408	0.630511	-0.825659	-0.559251	-1.31933	1.42063	1.87071	0.292427	1.17403	-0.540152	1.74054	1.07726	1.04027	-0.268405	0.95357	-0.647789	-0.633704	1.36919	2.46841
-10.5	-1.42212	1.62233	0.726309	-0.672563	0.530548	0.655658	0.868079	1.3748	-2.15979	-1.88431	-0.864053	-0.498494	0.760684	1.28881	1.33623	1.37395	1.43845	0.0605455	0.791951	0.723149	-0.530717	-0.435792	0.829146	-0.457926	1.45957	-2.03626	-0.276416	0.0848618	1.16576	0.473598	-1.68463	-1.20237	-0.956716	-0.288645	-1.01604	-0.661327	0.235117	-0.804174	0.296251	-0.540152	3.00638	-1.5271	1.82836	-1.84726	0.653233	0.971685	-0.633704	0.049489	1.51535
-10.2	-0.800426	0.686372	1.49085	-0.672563	0.75161	3.08402	1.67559	1.3748	0.791477	0.850977	-0.864053	-0.295027	-0.0507124	0.640353	-0.684956	-0.491142	1.43845	2.25532	0.931502	0.723149	-0.167834	-0.325465	0.288399	2.44954	1.64259	-0.0969646	-0.506762	-0.551601	0.239328	0.692181	-0.581964	-1.27569	-0.694602	-0.469049	-1.01604	0.318417	0.0306672	-0.804174	0.296251	1.684	1.74054	1.31402	0.252187	-0.268405	0.052559	0.43186	0.366881	0.214452	0.562301
-9.9	-1.26669	1.31035	0.471464	-0.672563	-1.45901	0.655658	-1.55447	0.961323	-0.41586	1.30686	-0.864053	-0.905428	0.557835	-1.46714	-0.909532	-0.739821	-0.108271	0.514636	-0.394231	1.03756	-0.80288	-1.64939	-2.41534	-0.0218061	-0.370612	-0.651048	-0.506762	0.297016	-0.223887	0.910764	0.153148	0.557196	-1.08777	-1.37107	0.197141	0.808289	-0.173782	0.10966	-1.45931	-0.857889	-0.15823	-1.76386	1.98597	0.678908	-0.247778	-1.72744	0.533646	-0.445401	-1.15319
-9.6	-1.26669	0.0623972	-0.802763	-0.0877252	0.309486	0.169986	0.0605633	-1.72625	-1.0866	-0.668625	-0.442563	2.14658	-0.65926	1.45093	0.737357	1.12527	0.819762	-0.469227	-0.743108	2.60963	-1.61937	-0.656447	-1.33384	0.632374	0.45297	-1.20513	-0.199634	0.367734	-1.15032	-0.327875	1.25582	0.263935	-0.563545	-1.55147	-0.712741	0.440885	0.644016	-0.0731069	-0.362084	-1.49336	0.601276	0.130218	1.98597	-0.584176	0.95357	-1.18761	-1.46753	0.214452	-1.53441
-9.3	-1.26669	0.99836	0.216618	-0.0877252	3.40435	1.14133	-0.343195	-0.279094	-1.0866	-0.364704	-0.864053	1.53618	-0.65926	-0.656565	-0.160946	0.00621712	1.12911	0.817362	0.722176	1.35198	-0.258554	-1.75972	2.63164	1.28655	1.36806	-0.581788	-0.506762	0.0141436	-0.378292	0.0364306	0.765743	1.36366	0.09174	0.342766	-0.712741	1.29816	0.235117	-3.18014	-0.362084	-0.222415	2.12029	-0.106542	0.725038	-1.84726	0.95357	0.43186	-0.633704	-0.115474	-0.00953019
-9	-1.26669	-0.24959	1.236	-0.964981	0.309486	-0.315687	0.464321	1.3748	-1.48905	-0.364704	-0.0210738	1.12924	0.760684	-2.1156	-1.13411	-1.11284	-0.108271	0.136227	-0.184905	0.0943233	-1.07504	-1.20808	-0.612847	-1.11211	0.45297	-1.20513	-0.506762	0.226298	0.393733	0.182153	1.37834	-0.542533	-0.432488	-0.829856	-0.712741	0.195949	-0.99158	1.20626	0.954586	-1.17563	1.48737	1.55078	2.93167	-0.584176	0.95357	-1.72744	0.700409	0.049489	0.562301
-8.7	-0.178736	0.374385	-0.802763	0.497111	-0.574761	1.14133	0.464321	-2.13972	-1.6232	2.82646	-0.864053	-1.92276	-0.0507124	-0.332335	-0.0112288	-0.864161	-0.108271	-0.998999	0.791951	0.723149	-1.98225	-1.87004	-2.05484	-2.05703	0.635988	-1.62069	-0.737108	2.34784	0.0849227	-1.42079	-0.949521	-1.05574	-1.08777	-1.46127	-1.31933	0.195949	0.235117	-0.0731069	0.0768055	-0.222415	-0.0316463	1.31402	1.51312	0.363136	-1.14879	0.43186	0.366881	-0.280437	0.18108
-8.4	1.53091	-0.24959	-0.293072	1.08195	-0.353699	4.05537	-0.343195	-2.13972	0.657328	-0.668625	-0.864053	-1.31236	-0.253562	-2.60194	-0.46038	1.12527	0.510418	-0.242182	0.791951	-1.47774	-0.439996	-0.104811	0.468648	0.123567	2.19164	-0.235486	-0.276416	-0.410165	1.32016	-1.20221	0.643224	-0.029326	-0.039317	-0.829856	-1.31933	-0.538859	0.0306672	-0.0731069	2.27126	0.0953214	-0.0316463	1.31402	0.725038	-0.899948	0.653233	-0.647789	0.0333527	0.214452	2.08718
-8.1	0.753799	0.0623972	-0.0382264	1.37437	-0.795823	2.59835	4.09814	-1.51951	0.791477	-0.364704	-0.864053	-0.295027	0.152137	-0.49445	0.737357	1.00093	2.05714	-0.090818	0.0941967	-0.220089	0.557933	-0.215138	-1.69434	1.50461	0.635988	0.0415562	0.721752	0.367734	-0.223887	0.837903	0.765743	0.263935	2.05759	1.69579	-1.01604	-0.171455	0.0306672	-0.0731069	0.0768055	1.36627	1.48737	2.26106	-0.535898	1.31045	-0.397946	0.971685	-1.134	-0.280437	-0.771973
-7.8	0.442954	1.62233	-2.33183	-0.380144	1.4148	2.11268	0.868079	-0.0723576	-0.147564	1.00294	-0.0210738	-1.51583	-0.65926	0.154009	-0.310663	0.254896	-0.417614	0.438954	1.69903	2.60963	1.19298	-1.64939	0.648897	1.14118	0.635988	0.318598	-0.276416	1.21635	0.548137	0.765042	2.35849	1.73024	-0.301431	-0.0180404	-1.31933	-0.538859	-1.40048	0.840727	0.515696	1.36627	0.854445	0.130218	0.252187	-1.21572	-0.0976097	0.971685	-0.633704	-2.58992	-0.962583
-7.5	-1.42212	-1.18555	-0.293072	-1.2574	-0.574761	2.11268	0.0605633	-1.10604	-0.952455	-0.212744	-0.864053	0.722308	-2.0792	-1.30502	0.0636298	-0.864161	-0.108271	0.741681	0.722176	1.35198	-0.0771128	-0.656447	0.468648	-0.748673	-0.187594	1.21898	0.337841	0.367734	1.01135	1.49365	1.50086	0.630511	0.484911	0.0721614	-0.712741	-0.416392	0.644016	2.12009	0.954586	-0.540152	-0.284815	-1.5271	-1.79683	0.678908	1.25391	-1.18761	-1.134	-1.43518	0.562301
-7.2	-0.334158	1.62233	1.74569	-0.0877252	2.96223	1.62701	0.868079	-0.0723576	1.46222	2.37058	-0.864053	-0.0915603	-1.06496	-2.1156	-0.834673	-1.11284	-0.108271	-0.242182	0.722176	0.408736	-0.258554	-1.64939	-1.51409	0.0508807	1.00202	-0.512527	0.491406	-0.622319	-0.532697	0.109292	0.398186	-0.249272	0.222797	-0.739654	-0.409448	0.318417	0.0306672	2.48563	0.954586	2.31948	-0.284815	0.130218	-0.693515	0.0473661	0.352896	-1.72744	0.867174	-0.280437	-0.962583
-6.9	1.37549	0.686372	-0.0382264	-0.964981	-0.132638	0.169986	2.48311	-0.48583	0.791477	1.76274	-0.0210738	0.315374	0.557835	-1.62925	1.11165	-1.23718	-0.417614	-0.847635	-0.603557	1.35198	-0.439996	-0.435792	-0.252348	-0.239866	-0.55363	-0.85883	-0.737108	0.226298	0.239328	-1.12935	-0.949521	0.33725	-0.432488	-1.10046	0.197141	-0.783796	-0.378231	-1.35247	2.27126	2.95495	-0.284815	-1.76386	-1.32398	-0.584176	-1.29896	-1.18761	0.366881	-1.10525	0.752912
-6.6	0.442954	0.686372	0.216618	0.204692	1.4148	-0.801361	0.868079	-0.0723576	-0.013415	1.9147	-0.442563	0.518841	-0.65926	-0.49445	-1.95755	-1.11284	-1.34565	0.287591	1.55948	3.23845	1.19298	1.5501	-1.15359	1.86805	2.28315	0.6649	2.41096	1.21635	1.62897	2.44085	2.11345	2.17013	3.23711	1.51539	-1.01604	-1.5186	1.05291	0.840727	3.80737	0.730794	-0.284815	0.130218	-1.00875	-0.584176	-1.29896	-1.18761	1.53423	-1.76511	0.37169
-6.3	-0.645003	-0.873564	0.471464	-0.672563	0.75161	-0.801361	-1.15071	0.547851	1.59637	-0.0607839	0.400414	0.925775	-0.0507124	0.478239	0.0636298	-1.85888	-0.726958	-0.771953	1.35015	0.408736	1.19298	1.10879	-1.15359	0.995808	1.27655	0.734161	-0.122851	0.792043	1.16576	0.692181	1.1333	0.483881	0.747025	1.8762	-1.31933	0.318417	-2.01383	1.02349	2.4907	-0.222415	1.2342	2.73458	-1.00875	3.20508	-0.0976097	-0.647789	1.36747	-0.115474	-0.00953019
-6	-1.42212	-1.18555	0.216618	-0.0877252	0.972672	-0.315687	0.0605633	-0.48583	-0.41586	1.9147	-0.0210738	-0.0915603	0.354986	1.28881	-0.0860875	-0.242462	-0.108271	-1.37741	-1.09199	1.35198	0.376492	-0.435792	0.829146	-0.748673	1.18504	0.803421	0.491406	0.579889	0.393733	-0.473598	-0.091889	-0.102641	-0.694602	-0.829856	-1.31933	0.073481	-1.60493	-1.35247	0.0768055	-1.49336	1.48737	-2.00063	0.0945699	2.25776	-1.29896	-1.72744	2.70158	0.379415	0.37169
-5.7	1.22007	-0.873564	-0.293072	1.66678	0.75161	-0.315687	-0.343195	-1.10604	1.59637	1.61078	-0.864053	0.722308	0.760684	-0.170221	-0.684956	-1.36152	0.510418	-0.1665	-1.30131	0.723149	1.37442	0.777806	-0.793096	0.196254	-0.0960845	1.56529	0.0307128	-0.905192	-0.995912	-0.910764	0.398186	-1.12906	-0.694602	0.793775	0.197141	1.29816	2.48406	0.10966	0.0768055	-0.540152	1.48737	1.31402	-0.220664	0.0473661	-0.998621	1.51151	-0.133412	1.03927	-0.390751
-5.4	0.132109	-0.873564	0.981155	-0.672563	0.0884244	-0.801361	-1.15071	2.61521	-0.41586	0.395096	-0.442563	-0.498494	0.152137	0.640353	0.0636298	0.254896	-1.0363	-0.696272	0.163972	1.35198	0.648654	1.21911	-1.51409	0.995808	0.269952	1.56529	-0.506762	0.721325	0.239328	0.182153	-0.581964	-0.909109	-0.432488	-0.378847	-0.106153	0.440885	1.05291	0.475194	-1.67875	-1.17563	1.9937	1.31402	-1.16637	0.678908	-1.29896	0.971685	-0.967232	0.049489	-2.48747
-5.1	0.442954	2.24631	-1.31245	-0.0877252	-0.132638	-0.315687	0.464321	0.341114	-1.48905	-0.0607839	0.400414	-0.295027	0.557835	-0.980794	1.71052	0.752255	-1.34565	-1.60445	-1.65019	-1.16333	-0.439996	-0.435792	-1.87459	1.50461	-0.187594	0.110817	-0.122851	-0.0565745	0.856948	-0.400736	-0.214408	-0.322587	0.353854	-0.198444	0.500436	0.685821	0.848465	-1.90077	0.296251	-0.540152	-0.791152	-0.580063	0.252187	-1.21572	1.70441	-0.107966	0.533646	-0.775327	1.51535
-4.8	0.287532	0.374385	0.216618	-0.0877252	-1.23795	0.169986	-0.746951	-0.0723576	-0.952455	-0.212744	-0.442563	0.518841	0.152137	-0.49445	0.288206	0.503576	-0.108271	0.514636	-0.25468	-1.16333	0.104329	-0.656447	-1.51409	0.995808	0.635988	0.457119	-0.42998	1.21635	-1.76794	-0.109292	-1.19456	-1.49563	-0.825659	-1.37107	-0.712741	0.440885	-1.40048	-0.0731069	-1.67875	-0.540152	-0.284815	1.07726	1.82836	0.363136	-0.247778	-1.72744	-0.800468	-1.27022	0.18108
-4.5	1.22007	1.62233	-0.293072	-0.672563	0.75161	-0.801361	1.27184	0.754587	-1.6232	0.0911759	0.400414	-2.53316	-0.862109	0.154009	0.138488	-0.491142	0.510418	1.4985	0.791951	0.408736	0.648654	-0.546119	1.55014	0.850434	0.269952	-0.789569	1.41279	1.0042	-0.841507	1.12935	0.0306295	0.997088	0.615968	0.342766	-1.31933	1.42063	0.235117	-0.98694	-0.362084	0.730794	-0.15823	1.31402	-0.535898	-0.584176	-0.548115	-0.107966	-0.46694	1.36919	-0.581362
-4.2	-0.645003	-0.24959	0.981155	1.08195	0.530548	-0.315687	-1.15071	0.961323	0.523179	-0.212744	-0.864053	0.315374	-0.0507124	0.802468	-0.759815	-0.864161	0.201073	0.211909	-0.394231	0.408736	-1.25648	0.226171	-0.432598	-0.38524	1.18504	-0.235486	1.56636	-0.622319	0.239328	-0.182153	0.275667	-0.615848	1.00914	-0.378847	0.197141	1.29816	-0.787131	-0.255873	0.0768055	1.04853	-0.791152	-0.816823	-1.4816	-0.584176	-0.848452	-0.107966	-0.800468	1.69912	1.13413
-3.9	-0.0233135	0.374385	-1.82214	-1.54982	-1.23795	0.655658	-0.746951	-0.279094	1.05977	-0.0607839	-0.864053	-0.295027	-0.862109	-0.332335	-1.95755	-0.366802	-0.417614	-1.07468	-0.045354	0.723149	-0.80288	0.336498	1.18964	0.0508807	0.269952	0.941942	0.107495	-0.480883	-0.995912	-0.837903	-0.704483	-1.349	-0.170374	-1.01026	2.6235	1.42063	0.848465	0.10966	-1.45931	0.413057	-0.917737	0.603739	-0.378281	-0.899948	0.803402	-0.647789	0.200117	0.709342	-1.15319
-3.6	-1.26669	0.0623972	-1.82214	-0.964981	-0.574761	2.59835	0.868079	-1.10604	-0.952455	-0.972545	2.50786	-0.0915603	1.57208	1.61304	-0.834673	-0.864161	-1.34565	-0.090818	-0.184905	-0.848914	-0.530717	1.5501	0.468648	1.50461	0.727497	-0.374006	1.87348	-0.834474	1.01135	0.327875	-0.704483	0.777142	1.1402	0.703573	-0.106153	-0.0489871	-1.40048	0.840727	0.0768055	1.36627	-1.42407	-0.106542	-0.220664	-0.268405	1.10374	0.971685	-0.300175	0.214452	-0.00953019
-3.3	-1.26669	-1.49754	-0.293072	0.204692	0.530548	-0.801361	0.464321	1.3748	-0.013415	-1.12451	2.08637	-0.905428	-1.87636	-0.81868	-0.834673	0.130557	0.201073	1.04441	1.00128	-1.47774	1.91875	1.43977	1.0094	0.777748	1.00202	1.0112	-1.27458	1.42851	0.856948	1.05649	2.48101	0.923772	1.53337	2.3272	-0.712741	0.195949	-0.378231	0.475194	0.296251	1.36627	-0.664568	-1.05358	-1.4816	0.363136	-0.698284	-0.107966	0.200117	-0.610363	0.562301
-3	0.287532	1.62233	0.726309	1.9592	1.4148	-0.801361	0.0605633	1.16806	-0.281712	-0.668625	0.821904	0.722308	0.557835	0.964583	0.812216	-0.9885	0.510418	0.211909	1.35015	0.408736	0.830096	1.43977	0.288399	-0.312553	-0.462121	-0.235486	-0.967455	0.438452	1.78338	1.71224	0.153148	0.483881	0.222797	0.793775	0.197141	-0.0489871	0.0306672	1.57179	1.61292	-0.540152	-0.537984	-1.29034	0.0945699	-1.84726	-1.14879	0.43186	-0.967232	0.709342	1.13413
-2.7	-0.334158	-0.561577	1.49085	0.497111	-1.23795	-0.801361	0.0605633	-0.899302	0.657328	-1.42843	-0.0210738	1.33271	-0.45641	0.964583	0.213347	-1.11284	0.819762	0.363272	1.69903	1.66639	0.830096	1.21911	-0.612847	-0.0944928	-1.2857	0.52638	-0.353198	1.85281	-0.0694824	1.27507	-0.214408	-0.029326	1.27125	1.9664	-0.409448	0.563353	-0.378231	1.02349	-0.581529	-0.540152	0.348107	0.366978	-0.0630466	0.678908	0.803402	-0.647789	0.200117	1.03927	-0.390751
-2.4	0.753799	-1.18555	0.726309	1.08195	1.63586	-0.315687	0.464321	-0.899302	2.40126	-0.820585	-0.442563	1.94311	-0.0507124	-0.656565	0.213347	-1.23718	1.12911	-1.52877	-0.045354	0.0943233	0.0136082	-1.20808	0.468648	-0.821359	-1.65174	0.249338	-0.890673	0.50917	0.239328	-1.34793	-0.827002	-1.12906	-1.21883	-0.288645	-0.106153	-1.27367	-0.378231	-0.804174	0.296251	0.730794	0.72786	-0.580063	1.51312	-1.21572	2.00475	0.971685	1.70099	0.544378	-1.15319
-2.1	2.46345	0.374385	0.726309	1.37437	1.19373	2.59835	1.67559	-0.48583	0.523179	-1.27647	0.821904	-0.0915603	-0.862109	1.77516	-1.05925	-0.739821	2.05714	-0.544908	-1.51064	0.0943233	-0.984321	-0.877101	0.288399	-1.83897	-2.2923	-0.581788	-1.04424	-1.25878	-2.07675	-1.85796	-0.581964	-0.322587	-2.13623	-1.46127	2.3202	-0.416392	-0.582681	-0.0731069	1.39348	-0.540152	-1.67724	-0.816823	-0.378281	0.678908	0.202728	-0.107966	0.700409	-0.775327	0.943521
-1.8	0.132109	-0.561577	-0.802763	0.204692	-0.795823	0.655658	-1.95822	-1.31277	0.791477	-0.0607839	-0.442563	0.722308	0.963534	-0.332335	1.93509	1.87131	-1.34565	-1.07468	-1.23154	-1.79215	-1.07504	-0.877101	-1.15359	-1.6936	0.178443	-1.82848	-0.583544	-1.61237	-0.687102	-1.63938	-0.091889	-0.982424	-0.956716	-0.739654	0.197141	0.073481	0.644016	0.475194	1.39348	-1.17563	-0.411399	-0.106542	-0.0630466	-0.268405	1.40408	0.971685	-0.800468	-0.445401	-0.00953019
-1.5	-1.11127	0.686372	0.216618	-0.672563	-1.45901	-0.315687	-0.746951	-0.0723576	-0.41586	0.547057	-0.864053	0.722308	1.77493	-1.62925	0.58764	0.503576	-1.65499	1.12009	1.00128	1.03756	-1.71009	-0.546119	0.648897	-0.0218061	-0.00457534	-1.06661	0.184277	-0.339447	1.32016	0.61932	0.153148	0.850457	0.353854	0.162363	-0.712741	-0.906264	-0.378231	1.20626	0.735141	1.684	0.854445	-0.106542	-1.32398	1.31045	-0.397946	-0.647789	-0.133412	-1.43518	0.37169
-1.2	-0.334158	0.0623972	-0.293072	-0.380144	-1.45901	0.169986	0.0605633	-0.0723576	-0.684158	-0.364704	-0.864053	0.518841	-1.67351	-1.62925	1.18651	1.37395	0.201073	0.438954	-0.533782	-0.220089	-0.893601	-0.987428	-0.612847	-1.03942	0.0869335	-1.34365	-1.58171	-1.47094	0.0849227	-0.400736	2.60353	1.21703	-1.34989	-0.920058	0.197141	-1.1512	1.25736	-0.621407	-1.67875	1.04853	0.981029	-0.816823	1.82836	-0.899948	0.052559	-1.72744	1.03394	-0.775327	-0.00953019
-0.9	0.909221	0.374385	-0.802763	-0.964981	-0.353699	0.169986	0.868079	0.134379	0.254882	2.06666	-0.864053	-0.498494	1.16638	-0.81868	-0.0112288	1.99565	-0.726958	0.136227	0.791951	-0.534501	-0.80288	-1.64939	0.108149	-1.18479	-1.46872	-1.06661	1.56636	-0.622319	-0.378292	0.765042	0.0306295	1.80356	0.878081	0.252565	-0.106153	-2.13094	0.235117	-1.90077	0.735141	-1.49336	-0.411399	0.366978	-0.0630466	1.31045	-0.247778	1.51151	0.366881	0.049489	-1.3438
-0.6	-0.800426	-0.561577	-0.293072	-1.2574	0.530548	-0.801361	-1.15071	0.341114	-0.281712	0.850977	-0.864053	-1.51583	-0.45641	-0.332335	0.512782	0.503576	0.819762	0.893044	0.6524	-0.220089	1.2837	0.557152	0.648897	0.414314	0.269952	-0.92809	-0.122851	0.792043	0.702542	0.910764	-1.31708	-0.029326	0.484911	-0.198444	0.197141	-0.906264	0.0306672	0.65796	0.0768055	0.0953214	0.348107	0.366978	0.567421	0.0473661	-0.247778	-0.107966	-1.134	-2.09503	0.18108
-0.3	-0.645003	-0.24959	1.74569	-0.672563	0.0884244	-0.315687	1.67559	-0.899302	-0.281712	-0.212744	0.821904	-0.701961	-0.862109	-0.00810583	-1.43354	0.379236	1.12911	1.72554	0.791951	-0.848914	0.467212	-0.546119	1.0094	0.850434	1.36806	1.21898	0.64497	-0.339447	0.0849227	0.182153	0.398186	1.36366	0.615968	0.432968	-1.01604	-1.02873	-0.378231	1.02349	0.296251	0.0953214	-0.15823	1.55078	1.19789	0.0473661	-0.0976097	0.43186	-1.134	0.379415	1.13413
0	2.1526	0.0623972	3.78445	0.78953	-3.00644	1.14133	-1.15071	-3.1734	-2.42809	23.0372	-0.864053	-2.73663	-0.45641	-2.27771	4.03114	8.46131	-1.34565	1.64986	1.83858	0.0943233	4.00533	1.10879	1.73039	3.53984	0.269952	2.11937	1.41279	3.47933	3.48183	5.06385	1.1333	4.80948	2.31971	3.86063	-1.31933	-1.39614	0.848465	2.48563	6.00182	0.730794	-0.917737	6.04923	15.541	-0.268405	7.11048	0.43186	1.86776	-2.58992	-0.200141
0.3	5.72732	-0.561577	5.05868	3.71371	0.972672	3.08402	-0.343195	-3.79361	-1.22075	-0.820585	-0.864053	-3.5505	-2.4849	-3.08829	1.41108	2.86603	-2.27368	0.741681	1.07105	3.55286	4.73109	2.76369	0.468648	2.95835	-0.00457534	2.88123	3.33234	2.41856	1.32016	3.38804	0.643224	0.923772	3.36816	3.13902	-0.106153	-2.98822	-0.378231	-2.08354	10.8296	0.730794	-1.93041	3.2081	8.7635	-1.84726	6.50981	-2.80709	3.70217	-1.27022	-1.15319
0.6	3.08513	-1.80953	3.27476	0.497111	3.40435	4.54105	0.464321	-1.10604	-1.0866	-0.820585	-0.864053	-2.53316	-0.862109	-1.79137	-1.13411	1.99565	-2.27368	0.287591	-0.184905	2.29521	2.82595	2.65337	-1.87459	-0.239866	0.0869335	1.49603	-0.199634	-0.480883	-0.995912	0.546458	-0.704483	1.43698	1.53337	2.59781	1.71361	-2.13094	-0.173782	-2.63184	6.8796	2.63721	-2.31017	2.26106	7.8178	-1.84726	5.45863	-3.34691	1.86776	-2.25999	-1.53441
0.9	0.287532	-0.873564	0.981155	0.497111	0.0884244	3.08402	-0.746951	-2.55319	-2.56224	-1.58039	-0.864053	-1.51583	-1.26781	-2.27771	0.887075	0.627916	-1.65499	-0.1665	-0.464007	-0.848914	0.19505	-0.766773	-0.973346	-0.530613	-0.00457534	-0.99735	-0.583544	-0.551601	-1.45913	-0.983625	0.153148	-0.029326	1.27125	0.162363	6.56632	-1.5186	0.0306672	-3.18014	5.56293	2.63721	-2.56333	4.3919	2.45882	-2.4788	0.352896	-1.72744	0.867174	-1.10525	1.89657
1.2	-0.178736	0.686372	2.76507	-0.0877252	3.40435	0.169986	-0.343195	-1.10604	-1.6232	-1.27647	-0.864053	-2.3297	-2.0792	-3.2504	-0.834673	0.503576	0.201073	1.42282	-0.743108	0.408736	1.82803	0.557152	2.27114	0.123567	0.544479	0.110817	-0.660326	0.0141436	0.548137	0.546458	0.888262	1.80356	1.40231	1.60559	3.53338	-2.62082	-0.99158	-3.18014	6.00182	1.36627	-1.80383	0.8405	3.24691	-1.84726	2.15492	-2.80709	0.366881	-1.93007	-0.390751
1.5	1.06464	0.99836	2.51023	1.08195	0.75161	1.14133	0.0605633	-2.55319	-1.48905	-1.27647	-0.864053	-3.5505	-1.47066	-2.60194	-1.20897	-0.366802	2.67583	-0.1665	0.163972	1.03756	1.55586	1.9914	-0.0720999	0.196254	-0.370612	1.56529	0.64497	0.721325	1.01135	0.765042	1.1333	0.33725	1.1402	0.613372	2.01691	-1.27367	-1.40048	-2.99737	4.24626	0.0953214	-0.917737	2.0243	2.77406	-0.584176	1.10374	-1.18761	-1.134	-3.90963	0.37169
1.8	0.598376	1.31035	2.76507	-0.0877252	-1.23795	1.14133	-0.343195	-1.31277	-2.15979	-0.516665	-0.864053	-3.75397	-2.28205	-3.57463	-0.834673	0.130557	2.36648	-1.52877	-1.23154	-0.534501	3.0074	0.99846	-1.87459	1.43193	2.37466	1.98085	0.0307128	0.50917	1.16576	-2.65943	-0.949521	-0.029326	1.53337	1.78599	5.35314	-0.416392	-1.40048	-0.98694	1.61292	1.36627	-2.18358	1.07726	4.03499	-1.53149	0.052559	-3.34691	0.0333527	-3.41474	-0.00953019
2.1	0.287532	2.5583	1.236	-0.380144	-0.574761	1.62701	0.464321	-0.899302	-2.42809	-0.364704	-0.442563	-3.34703	-1.47066	-2.60194	0.138488	1.00093	1.43845	0.590317	1.07105	-1.16333	1.37442	-0.546119	0.108149	0.487001	0.727497	0.180077	1.25923	2.13569	-0.223887	0.0364306	2.23597	3.04991	3.49922	3.95083	4.13997	-1.76354	-1.40048	-2.81461	2.4907	-0.222415	-0.791152	4.86543	3.08929	-0.899948	0.503064	-2.26727	1.36747	-1.27022	-0.390751
2.4	-0.800426	-0.873564	1.74569	-0.672563	-0.353699	3.08402	0.868079	-3.58687	-0.818306	-0.0607839	-0.442563	-2.9401	-1.47066	-3.08829	-0.684956	0.130557	0.819762	-0.544908	1.28038	4.18169	1.46514	2.54304	0.108149	1.86805	1.91712	2.39641	2.02705	2.27712	1.78338	2.36799	2.48101	2.31676	5.72719	5.03326	2.6235	-0.661327	-0.582681	-2.08354	1.61292	-0.222415	-2.8165	0.603739	2.93167	-0.268405	1.70441	0.971685	-0.633704	0.544378	0.37169
2.7	-1.42212	0.374385	2.25538	-0.964981	0.530548	1.14133	-0.343195	-0.899302	-0.952455	0.243136	-0.864053	-3.5505	-1.87636	-2.76406	-1.35868	-0.242462	0.510418	0.817362	0.0244215	1.03756	1.46514	1.43977	1.18964	3.61253	1.7341	1.42677	1.41279	2.91359	1.16576	1.05649	0.398186	1.36366	5.46507	1.78599	3.53338	0.195949	-0.582681	-1.53524	-0.362084	-0.540152	-1.80383	0.366978	4.50784	-1.21572	-0.247778	-1.18761	-0.46694	-0.445401	0.18108
3	-0.955848	0.99836	1.74569	0.204692	1.4148	2.59835	1.27184	-2.96666	-0.013415	0.547057	-0.864053	-2.9401	-1.26781	-1.30502	-0.310663	-1.85888	4.22255	1.12009	1.69903	1.35198	3.37028	3.31533	1.73039	1.50461	2.28315	2.9505	1.7967	2.63071	3.32743	2.51371	2.23597	2.53671	9.52784	6.65689	1.71361	-0.171455	0.644016	0.10966	-1.23986	2.00174	-1.42407	0.603739	1.19789	-0.584176	-0.848452	-1.72744	0.700409	-0.610363	0.943521
3.3	-1.57754	0.374385	1.236	-1.2574	0.309486	-0.801361	-1.55447	-4.20708	1.59637	1.9147	-0.442563	-3.34703	-1.87636	-1.46714	0.737357	-1.6102	4.84123	1.19577	0.861727	1.9808	4.09605	2.65337	1.73039	3.83059	2.19164	3.50458	0.184277	1.85281	2.09219	1.12935	3.0936	2.61002	5.0719	7.01769	2.6235	2.03297	-0.173782	-1.71801	-2.11764	0.730794	-1.42407	0.8405	1.35551	-1.53149	0.653233	-1.18761	2.53482	-1.76511	-0.581362
3.6	-2.19923	-0.561577	2.00054	-1.84224	-1.01688	-0.801361	-1.15071	-1.51951	-0.41586	-0.0607839	-0.864053	-1.92276	-1.26781	-2.1156	-0.759815	-1.98322	5.45992	2.40668	1.62926	1.35198	2.46307	2.98435	0.288399	2.81297	1.82561	1.28824	0.261059	4.04508	2.5554	4.11665	2.11345	4.80948	6.38247	4.58225	0.197141	-0.0489871	-0.173782	-3.72844	-1.02042	0.0953214	-1.55066	3.2081	1.04027	-0.584176	-0.848452	-0.107966	0.200117	0.379415	0.37169
3.9	0.753799	2.5583	2.25538	-0.964981	-0.132638	0.169986	-0.746951	-1.31277	5.35253	0.395096	-0.864053	-1.92276	-0.253562	0.316124	-1.35868	-1.11284	10.7188	1.57418	-0.952435	1.35198	1.91875	0.115844	-0.793096	3.03103	1.55108	3.08902	1.25923	1.07492	1.32016	2.51371	0.398186	1.80356	5.33402	2.86841	3.83667	0.440885	-0.582681	-0.98694	-2.99542	-0.222415	-2.057	2.73458	3.71976	-1.53149	1.10374	-0.107966	-2.13458	-1.76511	-0.581362
4.2	-0.0233135	-0.561577	1.74569	-0.672563	1.4148	1.62701	-1.55447	-0.0723576	4.27934	-0.364704	-0.864053	-2.73663	-0.45641	-1.14291	-0.684956	-1.23718	7.62533	0.741681	2.25724	1.03756	3.73316	3.42566	1.55014	3.32178	1.18504	5.44387	2.64131	2.56	2.5554	2.1494	2.72604	2.24345	7.95515	6.02547	1.71361	0.073481	0.235117	0.292427	-1.8982	1.04853	-1.80383	-0.343302	2.61644	-0.268405	0.052559	-0.647789	-0.633704	-2.09503	-0.581362
4.5	-0.489581	-0.24959	-0.0382264	-0.672563	-0.132638	0.655658	-0.343195	-0.899302	0.120734	0.0911759	-0.864053	-0.905428	0.963534	-2.60194	0.138488	-0.739821	2.98517	1.12009	2.60611	1.03756	2.55379	2.32239	0.468648	3.03103	2.19164	2.18863	2.94843	4.5401	3.32743	-1.05649	1.37834	2.90328	2.84394	4.13124	-0.712741	-0.0489871	-0.173782	0.475194	-3.87321	-0.540152	-1.55066	-0.343302	2.30121	-0.584176	-0.0976097	-2.80709	-0.967232	-2.09503	-0.771973
4.8	-1.42212	-0.24959	1.49085	-1.54982	0.75161	1.62701	1.27184	-1.51951	1.32807	-0.0607839	-0.864053	-0.701961	-1.06496	-1.62925	-0.0860875	-1.73454	5.45992	1.04441	1.28038	0.408736	2.82595	1.66042	0.648897	1.72267	1.00202	2.60419	2.64131	1.71138	4.40826	1.7851	0.888262	0.557196	6.38247	4.94305	-0.712741	1.66557	0.235117	-1.71801	-3.65376	0.0953214	-1.17091	-1.5271	4.82308	0.0473661	1.25391	-2.26727	-0.300175	-1.60014	-0.00953019
5.1	-0.0233135	-0.24959	2.00054	-1.2574	-1.90113	0.655658	-1.55447	-2.34646	5.62082	-0.820585	-0.864053	-2.73663	-1.47066	0.154009	-0.610098	-1.6102	5.45992	2.55804	1.62926	-0.534501	3.64244	2.21206	-0.612847	2.15879	-0.645139	2.39641	0.952098	2.9843	0.856948	0.61932	1.50086	1.80356	4.41662	7.01769	0.197141	0.808289	0.0306672	-2.26631	-2.99542	0.413057	-0.917737	1.55078	5.29593	-0.584176	0.503064	-0.107966	0.200117	-1.76511	-0.390751
5.4	0.753799	0.686372	1.49085	0.497111	1.85692	0.655658	0.464321	-1.31277	-0.41586	-0.0607839	-0.864053	-1.7193	-1.26781	0.154009	-2.18213	-1.6102	5.15058	2.40668	1.00128	1.66639	1.01154	0.226171	-0.0720999	0.487001	2.83221	1.08046	0.107495	0.367734	3.17302	1.42079	1.25582	1.43698	4.54768	5.03326	0.803729	2.27791	-0.173782	-2.63184	-4.09265	2.00174	1.36078	-2.23739	2.77406	-1.21572	0.352896	-0.107966	0.200117	-1.43518	1.13413
5.7	-0.645003	0.0623972	2.25538	-0.0877252	-0.574761	-0.801361	-1.55447	-0.692566	2.93785	0.699016	-0.864053	-1.92276	-0.65926	1.77516	0.737357	-1.23718	7.31599	-0.393545	0.6524	1.03756	0.648654	-0.435792	-2.23509	1.86805	0.178443	0.872682	0.184277	2.84287	0.702542	0.765042	-0.827002	-0.395902	3.36816	4.40184	-0.712741	1.29816	-1.19603	-2.26631	-4.53154	1.36627	-0.537984	0.603739	1.67074	-0.268405	0.202728	-0.647789	1.03394	-1.76511	-0.00953019
6	0.287532	-0.24959	0.471464	-0.380144	-0.132638	1.14133	-0.746951	-0.899302	2.40126	-1.58039	-0.0210738	-1.51583	-0.45641	-0.170221	-0.909532	-1.23718	4.22255	0.438954	0.861727	1.35198	1.55586	1.5501	-1.15359	-0.239866	1.00202	1.63455	1.64314	1.14563	0.0849227	-1.20221	-0.949521	0.483881	2.58182	3.68023	-0.712741	1.5431	-0.582681	-1.53524	-4.09265	2.63721	-0.411399	-0.816823	2.61644	-0.584176	0.052559	0.971685	0.0333527	-3.41474	-0.200141
6.3	-0.800426	0.0623972	1.236	0.204692	-0.795823	-0.801361	-1.15071	-2.75993	-0.147564	-0.212744	-0.864053	0.111907	-0.0507124	0.154009	-0.385522	-0.864161	4.84123	-0.0151363	-0.673333	1.03756	1.37442	0.226171	-1.15359	-0.457926	-0.0960845	1.84233	1.02888	1.14563	-0.378292	-0.983625	1.74589	0.19062	4.28556	3.77043	-0.712741	2.52284	-0.582681	-2.44907	-3.87321	1.36627	-1.67724	-1.5271	1.51312	-0.268405	-0.397946	-1.18761	-0.133412	-0.94029	0.37169
6.6	-0.800426	0.686372	0.471464	-0.672563	-1.23795	0.169986	-1.55447	-0.279094	0.254882	0.0911759	-0.442563	-1.7193	-0.253562	-0.00810583	0.58764	-1.36152	4.22255	-0.847635	0.0244215	2.92404	0.467212	1.77075	-0.793096	1.86805	0.635988	-0.443267	-0.276416	1.49922	0.0849227	-0.692181	-0.091889	0.923772	4.02345	3.77043	-1.01604	2.03297	-0.99158	-1.71801	-4.53154	1.04853	-0.917737	1.55078	0.252187	-1.53149	-2.0498	-1.72744	-0.133412	-1.76511	-0.390751
6.9	-1.57754	-0.24959	-1.31245	-1.2574	1.19373	-0.801361	-1.95822	-1.31277	-0.013415	1.61078	-0.442563	-1.51583	0.557835	0.802468	-1.5084	-1.11284	4.84123	1.42282	0.6524	1.9808	0.648654	-0.435792	-2.05484	-0.6033	1.82561	0.180077	0.491406	2.84287	-1.15032	-0.109292	-0.214408	-1.05574	2.18865	1.9664	-0.712741	4.11493	-0.582681	-1.71801	-4.31209	1.36627	-0.537984	0.8405	1.35551	0.994679	-0.0976097	-1.72744	0.0333527	-0.445401	0.37169
7.2	-1.42212	0.0623972	-0.293072	-1.84224	1.19373	4.54105	3.69438	-3.58687	-1.48905	-0.212744	-0.864053	-0.905428	-0.65926	-0.49445	-2.03241	0.130557	4.22255	0.438954	1.41993	2.60963	1.7373	1.5501	1.73039	2.37685	-0.00457534	1.56529	1.18244	3.19646	1.32016	0.61932	2.72604	0.263935	4.02345	4.49205	-0.712741	5.82948	0.439566	-0.804174	-3.65376	1.36627	-0.0316463	0.366978	-0.0630466	-0.899948	-0.247778	-1.72744	-0.300175	-1.10525	1.51535
7.5	-0.955848	0.374385	-0.0382264	-1.54982	0.75161	4.05537	1.27184	-1.31277	-0.684158	0.243136	-0.864053	1.94311	1.97778	-0.81868	-0.909532	0.254896	2.67583	-0.242182	0.791951	4.4961	0.830096	2.65337	1.36989	2.44954	2.10013	2.60419	1.71992	2.13569	0.393733	3.4609	4.56383	2.24345	7.56198	5.12346	0.197141	5.46208	-0.99158	-0.804174	-3.65376	2.31948	2.12029	-1.29034	0.0945699	1.31045	-0.698284	-0.647789	-0.133412	0.214452	-0.771973
7.8	-0.334158	1.31035	-0.0382264	0.497111	-1.90113	0.655658	0.0605633	-0.692566	0.389031	-0.364704	-0.864053	0.925775	-0.0507124	-0.49445	-1.35868	0.379236	2.67583	-0.090818	0.443074	0.0943233	1.82803	0.667479	-0.432598	2.01342	0.727497	3.08902	1.25923	2.20641	-1.45913	0.473598	1.99093	0.777142	3.89239	5.12346	-1.01604	4.11493	-0.582681	-1.35247	-2.77598	2.00174	0.348107	-0.343302	2.14359	-1.21572	-1.44913	-3.88674	-0.46694	-0.280437	0.37169
8.1	-1.11127	0.686372	1.236	-0.964981	0.75161	-0.801361	-0.746951	0.547851	2.40126	0.547057	-0.864053	-0.905428	-1.06496	-0.170221	-0.834673	-0.491142	4.22255	0.363272	-0.394231	1.35198	0.0136082	0.99846	-0.0720999	2.59491	2.64919	1.63455	-0.81389	1.99425	-0.687102	-0.983625	-1.31708	0.19062	2.97499	1.8762	-1.01604	4.11493	-0.378231	-1.53524	-2.11764	1.36627	0.72786	-1.29034	1.04027	0.0473661	0.352896	-0.107966	-1.30076	1.69912	-0.200141
8.4	-0.800426	-0.561577	0.471464	-0.0877252	2.07798	1.14133	-0.343195	0.754587	0.791477	-2.03627	-0.442563	0.518841	-1.06496	-0.332335	2.30939	-0.615481	5.15058	1.19577	-0.25468	0.723149	2.19091	2.65337	-1.69434	3.39447	0.910516	1.77307	0.337841	1.92353	-0.687102	1.20221	1.74589	0.923772	3.23711	2.41741	-1.31933	4.6048	-1.60493	-0.98694	-1.67875	1.684	-0.284815	-0.343302	0.567421	0.0473661	1.40408	-0.647789	2.36805	-1.27022	1.32474
8.7	-1.88838	1.31035	0.471464	-1.2574	-1.01688	1.62701	1.67559	1.78827	0.254882	-1.58039	-0.864053	-0.701961	0.760684	0.154009	-0.160946	-1.48586	3.60386	0.741681	0.861727	-0.848914	1.01154	1.10879	0.288399	0.196254	1.82561	0.6649	0.0307128	0.650607	2.401	0.983625	2.11345	1.21703	4.02345	1.8762	-1.01604	3.86999	-0.99158	-1.53524	-2.11764	1.36627	-1.80383	-2.00063	-0.693515	-2.16303	-1.5993	-2.80709	0.700409	-1.43518	0.752912
9	-1.57754	0.686372	0.726309	-0.964981	-0.353699	1.62701	2.48311	2.20174	0.791477	-1.12451	-0.442563	0.518841	1.16638	1.28881	0.58764	-0.615481	3.60386	1.42282	2.32701	2.60963	-0.0771128	1.10879	-0.612847	0.0508807	1.64259	-0.581788	1.02888	0.226298	1.32016	1.71224	-0.704483	2.0235	4.41662	1.8762	0.803729	4.9722	-0.787131	1.02349	-2.55653	2.63721	0.348107	-0.580063	2.45882	-2.16303	-1.44913	-0.647789	0.0333527	-1.27022	2.84963
9.3	-0.800426	0.686372	-0.0382264	-0.380144	0.0884244	0.655658	-1.55447	-0.692566	-0.684158	-1.42843	-0.864053	0.518841	-0.65926	1.61304	0.961933	-0.615481	1.74779	0.968726	-0.184905	-2.42098	1.91875	1.88108	-0.432598	1.79536	1.36806	1.42677	1.25923	2.13569	2.401	1.56651	-0.336927	1.36366	2.18865	5.21366	0.197141	4.6048	-0.378231	-0.255873	-2.55653	1.684	1.48737	-0.816823	0.567421	-0.584176	-0.848452	-1.72744	-1.134	-0.610363	1.70596
9.6	-1.88838	0.0623972	0.471464	-0.380144	-0.132638	2.11268	1.67559	-0.48583	-0.684158	-1.58039	-0.864053	-0.498494	0.557835	0.154009	-1.88269	-0.118123	2.05714	-0.696272	1.14083	0.0943233	1.64658	2.87402	-0.0720999	1.64999	0.635988	0.180077	1.33601	1.92353	-0.378292	2.00368	-0.091889	1.36366	4.02345	1.8762	-1.01604	2.52284	-0.582681	0.840727	-0.142639	3.27268	0.854445	-0.580063	0.882655	1.94199	-0.548115	2.05134	0.200117	-1.76511	-0.00953019
9.9	-1.26669	-0.24959	-0.0382264	-1.2574	0.0884244	1.62701	1.27184	4.68257	-1.0866	-0.668625	-0.864053	0.518841	-0.862109	-0.332335	-1.05925	-0.242462	4.84123	0.741681	1.2106	1.9808	2.64451	1.43977	-0.432598	-1.03942	-0.00457534	1.77307	1.41279	-0.198011	0.393733	1.12935	-0.214408	2.31676	1.53337	2.59781	-0.106153	2.76778	1.05291	-0.43864	0.0768055	0.730794	0.0949382	1.07726	0.0945699	-2.4788	0.653233	-2.26727	0.366881	-1.10525	2.84963
10.2	-1.26669	-0.24959	1.236	-0.0877252	-0.795823	-0.315687	-0.746951	2.61521	-0.952455	-1.58039	-0.864053	-1.7193	-0.862109	0.478239	-0.759815	-0.242462	5.76927	0.893044	2.11768	2.29521	1.82803	1.43977	0.468648	1.35924	1.18504	0.180077	1.18244	1.71138	1.93778	2.29513	2.35849	1.95019	3.76133	1.9664	-1.31933	2.52284	-0.787131	0.292427	0.0768055	4.54363	-0.791152	-0.816823	2.30121	-0.584176	-1.5993	-0.647789	-0.46694	-1.27022	-1.15319
10.5	-1.57754	0.374385	0.216618	-0.964981	-1.45901	2.11268	-0.746951	2.61521	1.73052	-2.34019	-0.864053	0.925775	-0.45641	0.802468	-1.65812	-0.366802	4.22255	0.287591	1.14083	0.0943233	-0.349275	-0.104811	-0.252348	1.06849	0.178443	1.42677	0.184277	0.297016	1.78338	2.1494	0.520705	0.630511	2.31971	0.52317	-1.31933	2.40037	-0.787131	0.475194	1.17403	5.1791	-1.17091	1.78754	1.51312	-1.53149	-0.247778	-1.72744	0.0333527	-1.76511	0.752912
10.8	-2.0438	-1.18555	0.471464	-0.672563	-0.574761	-0.801361	1.27184	4.88931	1.05977	-1.73235	-0.864053	-1.31236	-0.45641	0.154009	-0.684956	-0.615481	1.74779	0.968726	0.6524	1.66639	0.285771	0.667479	0.829146	0.559687	-1.10268	-0.85883	-0.737108	0.0848618	1.01135	1.20221	-0.459446	0.483881	-0.432488	0.342766	-1.31933	2.52284	-0.582681	-0.43864	-1.67875	3.27268	-1.42407	2.26106	3.24691	0.0473661	-1.14879	-3.34691	0.366881	-0.775327	1.89657
11.1	-0.955848	0.374385	0.216618	-0.380144	-1.23795	1.62701	-1.55447	3.85563	0.254882	-2.18823	-0.0210738	0.111907	-0.0507124	0.478239	0.0636298	-0.118123	1.12911	0.438954	0.0244215	1.35198	-0.80288	0.557152	1.18964	0.123567	1.09353	-1.62069	-0.660326	1.35779	1.93778	1.63938	1.99093	-0.029326	1.1402	0.162363	2.6235	2.27791	-0.582681	-1.16971	-2.33709	1.36627	-1.17091	1.55078	0.252187	1.31045	-0.848452	-3.34691	1.2007	-2.25999	0.752912
11.4	-0.334158	0.686372	2.00054	0.204692	-1.68007	-0.315687	-2.36198	5.30278	-0.818306	-1.27647	0.400414	-0.905428	-0.45641	-1.30502	-2.63128	0.627916	1.12911	-0.0151363	1.41993	2.29521	0.648654	0.00551636	0.288399	0.123567	-0.0960845	-0.581788	-0.42998	1.28707	1.78338	2.44085	2.11345	1.21703	2.84394	1.9664	-0.106153	1.66557	-0.787131	-1.16971	1.61292	3.90816	-0.917737	-0.106542	0.0945699	-0.268405	-1.44913	-1.72744	-0.133412	-2.42496	-0.00953019
11.7	-1.42212	0.0623972	2.25538	-0.672563	0.530548	-0.315687	-1.55447	2.40848	-1.3549	-1.42843	-0.0210738	-1.1089	0.963534	-0.980794	-0.759815	-0.242462	2.05714	0.817362	-0.11513	-0.848914	-0.80288	-0.325465	-1.69434	0.0508807	0.544479	-1.20513	-1.35137	0.297016	-0.378292	-0.255014	-0.704483	0.33725	-0.563545	-0.649452	-0.106153	2.64531	-2.01383	0.10966	0.954586	2.31948	3.6393	0.130218	2.61644	0.363136	0.803402	-0.107966	-0.133412	-0.280437	1.51535
12	-0.489581	0.374385	1.236	-1.2574	-1.68007	-0.801361	-2.36198	3.23542	0.523179	-1.27647	-0.442563	-1.31236	0.557835	-0.170221	0.138488	-1.36152	0.819762	1.19577	0.443074	-0.848914	-0.80288	-1.20808	0.288399	0.123567	0.269952	0.387859	0.0307128	0.0848618	-0.0694824	0.109292	1.62337	0.630511	0.09174	-0.559251	0.197141	1.9105	-0.582681	0.10966	-1.02042	1.36627	-1.04432	-1.05358	-0.0630466	-1.53149	-0.848452	-1.18761	1.03394	-0.445401	0.18108
12.3	-2.19923	-0.873564	3.78445	-0.964981	-0.353699	-0.801361	-2.76574	0.754587	-0.013415	-1.42843	-0.864053	-0.498494	0.354986	0.964583	-0.535239	1.00093	0.510418	0.741681	0.373299	0.723149	1.64658	1.5501	1.0094	0.705061	-0.645139	1.63455	0.414623	0.0141436	-0.378292	1.93082	0.153148	-0.835794	2.45076	1.9664	-0.712741	2.40037	0.235117	-0.804174	-1.23986	0.0953214	-0.15823	0.8405	1.35551	-1.21572	-0.247778	1.51151	-0.967232	0.544378	-0.962583
12.6	-1.26669	-0.24959	2.51023	-0.380144	-0.132638	-0.801361	-2.76574	2.40848	1.99881	0.0911759	-0.0210738	-0.701961	0.152137	1.28881	2.53396	0.130557	0.201073	1.95259	-0.324456	0.0943233	-0.258554	-0.325465	-0.793096	0.341627	1.00202	-0.235486	-0.0460691	-0.905192	2.24659	2.58657	0.275667	0.263935	2.18865	1.60559	1.41032	1.42063	0.0306672	-0.804174	-0.362084	0.413057	0.474691	-1.05358	2.14359	-0.268405	-0.397946	-2.26727	-0.300175	-0.115474	0.562301
12.9	-1.73296	0.374385	3.52961	-1.54982	0.309486	0.169986	-1.15071	3.64889	4.14519	-0.668625	-0.442563	-0.701961	0.963534	0.154009	-0.46038	0.130557	0.819762	0.741681	1.14083	1.66639	1.01154	0.446825	-1.87459	-0.0218061	2.00863	-0.581788	0.337841	1.0042	0.239328	-0.837903	-0.091889	0.33725	0.09174	1.24478	-0.409448	2.40037	0.235117	2.48563	-0.581529	0.730794	0.981029	0.8405	2.61644	-1.21572	-1.29896	-1.18761	0.0333527	0.544378	1.32474
13.2	-0.955848	-0.561577	2.25538	-1.54982	0.0884244	-0.315687	-1.95822	4.68257	0.657328	-1.12451	-0.864053	0.315374	0.354986	-0.81868	-1.65812	-0.366802	0.510418	1.72554	-1.58041	-0.848914	-0.439996	1.32944	-0.432598	0.559687	0.0869335	0.734161	0.568188	1.64066	0.0849227	0.910764	0.643224	0.483881	1.27125	0.883977	-1.01604	3.13518	0.235117	-0.804174	0.954586	4.22589	3.00638	0.603739	3.24691	-1.84726	0.052559	0.43186	0.867174	-0.610363	1.51535
13.5	-1.42212	-1.49754	0.216618	-1.84224	2.07798	0.655658	-2.36198	1.995	0.523179	1.00294	0.400414	-1.1089	-0.45641	0.154009	-1.35868	-1.23718	2.05714	0.438954	0.163972	0.723149	-0.0771128	-1.42874	0.288399	1.5773	0.819007	0.180077	-0.122851	2.34784	0.239328	-0.400736	1.37834	0.777142	-0.039317	0.703573	-1.01604	2.03297	0.439566	-1.71801	0.954586	3.27268	1.2342	0.366978	2.93167	-1.84726	0.95357	1.51151	-0.967232	1.03927	0.37169
13.8	-1.26669	0.374385	1.74569	-0.672563	0.530548	-0.315687	-1.15071	1.16806	-0.013415	-0.516665	2.08637	-0.295027	-1.06496	-0.332335	-0.984391	-0.491142	2.36648	0.514636	0.791951	2.92404	-0.80288	0.115844	-2.59559	1.43193	0.0869335	1.49603	1.18244	0.933479	0.239328	-0.837903	-1.19456	0.630511	-0.563545	-0.198444	-1.01604	1.5431	-0.787131	0.840727	0.0768055	1.36627	-0.917737	1.78754	3.71976	-1.53149	0.052559	-0.647789	-1.30076	0.379415	-1.3438
14.1	1.06464	-0.873564	0.981155	0.78953	1.63586	-0.801361	-1.95822	0.961323	0.523179	-1.12451	-0.864053	-0.295027	-1.26781	-0.81868	-0.909532	0.503576	0.819762	-0.0151363	0.582625	3.23845	-1.07504	-0.435792	1.55014	0.268941	-0.187594	-0.374006	-0.0460691	0.792043	0.856948	0.400736	1.86841	1.58361	1.92654	0.793775	-0.106153	0.685821	0.235117	-1.35247	1.17403	1.36627	1.2342	0.8405	0.882655	-1.21572	0.803402	-0.107966	0.366881	-1.43518	2.84963
14.4	0.909221	-0.24959	-0.293072	0.78953	0.0884244	-0.801361	0.0605633	1.3748	-0.281712	-1.27647	-0.864053	0.111907	1.16638	-1.14291	1.86024	0.254896	-0.726958	0.287591	-0.603557	2.60963	-1.16576	-0.435792	-0.0720999	2.44954	-0.279103	-0.374006	0.64497	0.721325	-0.532697	0.473598	0.398186	1.51029	2.84394	0.0721614	0.197141	0.808289	0.235117	1.38903	1.61292	-0.540152	-1.55066	3.91838	0.725038	-1.21572	0.803402	-0.107966	-0.46694	-0.280437	0.752912
14.7	1.68633	1.93432	0.216618	-0.964981	-0.574761	0.169986	1.27184	0.754587	-0.147564	0.0911759	-0.442563	2.14658	0.557835	0.316124	-1.05925	-1.36152	-0.726958	0.438954	-1.16176	-0.220089	0.739375	1.66042	-1.15359	1.21387	0.178443	-0.374006	1.18244	1.7821	0.856948	0.255014	1.1333	1.0704	1.40231	0.793775	-1.31933	-0.0489871	0.235117	0.840727	1.39348	2.31948	-1.29749	3.44486	-0.378281	1.31045	0.352896	0.971685	2.20129	0.544378	1.70596
15	-0.334158	-1.49754	0.216618	-1.54982	2.29904	1.14133	2.07935	-0.899302	-0.41586	0.850977	-0.864053	0.111907	0.354986	1.28881	-2.33185	-0.9885	-0.108271	-0.242182	0.233748	2.92404	1.10226	3.75664	0.288399	2.6676	2.00863	1.77307	2.25739	0.50917	2.86421	0.837903	0.765743	0.997088	2.45076	1.42519	-0.106153	0.685821	-0.378231	0.475194	0.515696	0.730794	-1.17091	1.55078	-2.11207	1.94199	-1.29896	-1.72744	0.200117	0.544378	-0.200141
15.3	-2.0438	0.374385	0.981155	-1.2574	-0.574761	2.11268	0.868079	-0.899302	-0.550009	-1.27647	-0.864053	-0.0915603	-0.45641	2.09939	-0.535239	-0.864161	0.510418	-0.696272	-0.812884	3.23845	1.91875	0.888133	0.468648	2.52223	0.0869335	1.70381	0.0307128	-0.834474	-0.0694824	-1.49365	-0.091889	0.630511	3.63028	2.86841	-1.31933	2.15544	-1.60493	2.85116	-1.23986	0.0953214	2.12029	0.366978	1.04027	-2.79457	-0.698284	2.05134	-1.46753	1.03927	-0.200141
15.6	-1.57754	0.0623972	-0.293072	-0.0877252	-1.01688	-0.315687	-0.343195	0.341114	0.657328	-1.58039	-0.442563	-0.0915603	-0.45641	1.45093	0.213347	-0.864161	0.201073	-1.15036	0.303523	1.9808	3.0074	-0.215138	-0.793096	0.196254	1.45957	0.941942	1.25923	-0.127293	-0.532697	0.473598	0.0306295	-0.395902	1.79548	2.86841	-1.01604	3.50259	-1.40048	-0.255873	-1.8982	-1.17563	3.89247	-1.29034	0.725038	-0.268405	0.202728	1.51151	0.0333527	1.20423	-0.00953019
15.9	-0.800426	-0.24959	1.74569	0.78953	0.530548	-0.315687	-1.55447	-0.48583	0.791477	-0.668625	-0.442563	-0.295027	0.354986	1.93727	-1.43354	-0.9885	0.510418	-1.8315	-0.743108	0.0943233	0.467212	-0.435792	-0.973346	1.43193	-0.0960845	1.84233	0.721752	0.933479	0.0849227	-0.765042	0.275667	-1.349	1.00914	-0.469049	-0.106153	2.40037	-0.378231	-0.255873	-1.02042	-0.540152	1.9937	0.603739	0.0945699	1.31045	-0.998621	2.05134	0.0333527	1.69912	-0.390751
16.2	-0.645003	0.686372	1.49085	-0.380144	0.309486	0.169986	-0.343195	-0.899302	2.13296	-1.42843	-0.864053	1.33271	-1.06496	3.23419	1.63566	-0.9885	-0.108271	-0.847635	-0.464007	0.408736	-0.621438	-0.877101	-0.973346	0.414314	1.00202	-0.0277043	1.02888	-0.97591	-0.687102	-1.56651	-1.80715	0.117304	0.484911	-0.108242	-1.01604	2.03297	-1.60493	0.292427	0.954586	1.684	-0.15823	1.07726	-0.378281	2.25776	-1.29896	0.971685	-0.800468	1.03927	-0.390751
16.5	-0.955848	0.374385	-0.0382264	-0.380144	-1.68007	1.62701	0.868079	1.16806	1.19392	0.0911759	-0.864053	-1.1089	-0.45641	2.58573	-1.35868	0.130557	-1.0363	-0.998999	-1.02221	2.29521	-0.712159	-1.09775	-0.252348	1.79536	0.544479	1.3575	-1.04424	1.56994	-0.223887	2.22226	1.25582	-0.102641	0.353854	-0.920058	-0.712741	0.685821	-0.378231	1.57179	2.71015	-0.222415	-0.791152	1.07726	-0.535898	0.0473661	-1.44913	-0.107966	1.53423	0.214452	0.562301
16.8	-1.73296	-1.18555	-0.293072	0.204692	-1.68007	0.169986	1.27184	1.3748	-0.684158	-0.364704	-0.864053	0.518841	-0.45641	1.45093	0.512782	-0.118123	-0.108271	0.211909	-0.603557	0.723149	-0.167834	-1.31841	-1.15359	2.08611	-0.279103	-0.99735	-0.583544	1.71138	0.393733	-1.05649	0.888262	-0.102641	0.222797	1.8762	-1.31933	2.52284	0.644016	0.65796	3.14904	1.04853	1.36078	3.68162	-0.378281	0.363136	0.202728	2.05134	-0.633704	-1.10525	0.562301
17.1	-1.26669	0.374385	-0.547918	-0.964981	-3.2275	1.14133	1.67559	-0.279094	1.05977	-0.820585	-0.864053	0.925775	-1.47066	-0.00810583	-0.0860875	-1.36152	-0.417614	-0.090818	-0.394231	2.29521	-1.3472	-1.31841	-1.15359	-0.312553	1.09353	-0.99735	-1.35137	0.579889	-1.15032	-0.910764	-0.459446	-1.56895	0.747025	-0.0180404	-1.31933	0.440885	2.48406	1.57179	0.735141	-0.857889	2.75321	2.0243	0.409804	1.94199	-1.14879	-0.107966	0.0333527	-1.43518	-0.581362
17.4	0.442954	0.374385	-0.802763	0.78953	0.309486	1.14133	1.27184	3.02869	1.73052	-1.12451	-0.0210738	-0.701961	-0.253562	-0.49445	-2.10727	0.752255	1.43845	1.57418	0.373299	-0.220089	-1.07504	1.43977	-1.15359	-2.27509	-0.736648	-2.03626	-0.276416	-0.834474	1.47457	0.255014	-0.704483	0.043989	-0.170374	0.432968	-0.106153	0.930757	-2.01383	-0.98694	-0.800975	0.0953214	-1.04432	-0.816823	0.0945699	0.0473661	-0.0976097	2.05134	0.533646	-1.27022	-0.200141
17.7	0.287532	0.99836	-1.05761	1.08195	-1.01688	0.169986	-1.15071	-0.0723576	0.925625	-1.12451	-0.0210738	1.12924	0.354986	-0.656565	-0.0112288	0.130557	-0.726958	-0.242182	0.163972	-0.848914	-0.984321	-0.877101	0.108149	-1.62091	0.727497	0.52638	-0.122851	-1.18806	-0.378292	-0.837903	-1.4396	-0.982424	-1.48094	-1.01026	-1.01604	1.66557	-0.173782	-0.255873	-1.45931	-1.17563	-1.67724	0.130218	0.0945699	-0.899948	-0.698284	-2.26727	0.700409	-1.93007	-0.390751
18	-0.645003	-0.561577	0.471464	-0.0877252	-0.795823	0.655658	0.0605633	2.20174	1.99881	-0.972545	-0.442563	-1.1089	0.963534	-0.656565	-2.18213	0.876595	-1.96433	0.590317	1.14083	-1.79215	-0.0771128	0.667479	-0.793096	-2.34778	-2.10928	-0.85883	0.184277	-0.693038	1.01135	-0.400736	0.398186	0.263935	0.747025	-0.288645	0.803729	1.29816	-0.378231	-0.621407	-0.142639	-0.857889	-1.93041	0.603739	-1.16637	-0.899948	-2.50031	-0.107966	0.533646	-0.445401	1.70596
18.3	-0.645003	-0.24959	1.236	-0.0877252	-2.78538	-0.315687	-0.746951	1.16806	2.66956	-0.212744	-0.864053	-0.701961	0.557835	-0.170221	-2.48156	-0.864161	-0.108271	-0.696272	-0.324456	-1.47774	0.285771	0.777806	0.108149	-0.675986	-1.10268	-1.06661	-1.04424	-0.0565745	-0.223887	0.983625	-0.214408	-1.64226	0.484911	0.0721614	-1.31933	3.01271	-0.378231	2.30286	-0.142639	0.0953214	1.61395	2.0243	-0.378281	0.0473661	-0.848452	0.43186	0.700409	0.214452	-0.581362
18.6	-1.42212	0.0623972	2.00054	-0.0877252	-1.23795	0.169986	-1.15071	-0.48583	1.73052	0.243136	-0.864053	-0.905428	-0.45641	-0.332335	-1.58326	0.379236	-0.417614	0.514636	1.14083	3.55286	-0.621438	-1.09775	-0.973346	-0.312553	0.0869335	0.457119	-0.737108	0.721325	-1.15032	0.546458	-1.07204	-0.542533	0.222797	0.342766	-0.106153	2.64531	0.0306672	0.292427	1.61292	-0.857889	4.01905	2.73458	1.04027	-0.268405	0.95357	2.05134	-0.633704	-0.280437	0.943521
18.9	-1.73296	0.686372	-0.0382264	-0.672563	0.75161	-0.801361	-0.343195	-0.0723576	-0.013415	0.395096	-0.442563	-1.7193	-0.65926	1.77516	0.662499	0.503576	-1.0363	-1.52877	0.443074	-0.220089	0.19505	-0.546119	0.288399	-0.894046	1.00202	0.59564	-0.122851	0.297016	-0.995912	0.473598	-0.091889	-0.982424	0.09174	-1.28086	-0.106153	2.03297	1.46181	1.75456	3.80737	1.04853	1.86712	-0.106542	3.08929	-0.584176	-0.0976097	1.51151	-0.46694	0.379415	0.18108
19.2	-1.26669	-0.24959	0.471464	-0.964981	0.309486	1.14133	0.464321	0.961323	0.389031	-0.364704	-0.864053	-1.1089	-0.65926	0.802468	0.437923	-0.242462	-0.726958	0.136227	0.582625	0.723149	0.0136082	-1.42874	0.468648	-0.821359	-0.828157	-1.41291	0.337841	-0.198011	0.702542	0.473598	0.0306295	-0.689163	-0.170374	-1.55147	0.500436	0.318417	0.439566	0.292427	2.71015	0.0953214	1.36078	2.0243	2.14359	-0.268405	-1.44913	-1.72744	-0.633704	0.544378	-0.00953019
19.5	-0.955848	0.686372	0.981155	-0.380144	0.309486	-0.801361	-0.343195	-1.31277	-0.952455	1.61078	-0.864053	-0.0915603	-1.67351	1.45093	0.961933	0.876595	0.819762	-0.847635	-0.324456	0.723149	-1.16576	-1.53906	-1.51409	0.123567	-1.10268	-1.55143	0.261059	-0.693038	-0.687102	0.546458	-0.459446	0.19062	-1.48094	0.162363	0.197141	0.930757	-0.173782	-0.255873	2.27126	0.413057	-0.664568	-2.00063	0.725038	-0.268405	-1.29896	-0.647789	-0.46694	-1.10525	-0.200141
19.8	1.53091	-0.24959	1.49085	0.204692	1.19373	1.14133	-1.55447	-0.0723576	1.05977	1.00294	-0.864053	-1.51583	-1.06496	1.77516	-0.385522	-0.118123	0.510418	0.665999	-0.25468	2.60963	-0.530717	-0.435792	-0.432598	0.0508807	0.269952	-0.443267	0.414623	-0.410165	-2.23115	-0.327875	0.398186	0.33725	-1.34989	-0.649452	2.01691	1.66557	0.848465	1.20626	2.71015	1.04853	0.221523	-0.343302	1.67074	1.94199	0.95357	-0.107966	-0.133412	4.17357	1.32474
20.1	2.30802	0.99836	0.216618	-0.380144	-2.56432	0.169986	-1.15071	1.58153	2.93785	0.547057	-0.0210738	-0.905428	-1.26781	1.45093	-1.28383	-0.9885	0.819762	1.19577	0.6524	-1.47774	0.920817	-1.98037	0.648897	0.196254	-0.00457534	-0.720309	-0.660326	0.50917	-0.532697	-0.61932	-1.07204	-0.982424	-0.694602	-1.01026	0.197141	1.66557	0.644016	1.75456	2.05181	-0.222415	-0.411399	1.31402	0.567421	-0.268405	-0.397946	0.971685	0.0333527	1.20423	-0.00953019
20.4	-0.0233135	-0.873564	1.49085	-1.2574	1.85692	1.14133	0.868079	1.16806	0.523179	0.850977	-0.864053	-0.498494	-0.253562	0.640353	-0.909532	0.503576	-0.417614	0.968726	0.931502	-0.220089	-1.3472	-1.31841	0.829146	-0.6033	0.269952	-1.48217	-0.583544	0.0848618	0.548137	0.692181	0.275667	0.483881	-0.563545	-1.28086	-1.31933	1.29816	-0.173782	2.30286	4.46571	2.31948	-0.411399	0.8405	0.0945699	2.25776	0.352896	-0.647789	0.700409	2.35897	-1.15319
20.7	-0.0233135	2.5583	3.01992	-0.964981	2.29904	-0.801361	-1.15071	2.61521	2.93785	0.850977	-0.864053	-1.1089	2.18063	1.77516	-1.73298	0.752255	2.36648	0.363272	-0.394231	1.9808	-1.61937	-1.87004	-2.41534	-0.239866	0.544479	-0.99735	0.0307128	-0.268729	-0.223887	-0.255014	-0.214408	0.043989	-0.694602	-1.55147	-1.01604	0.930757	-0.582681	2.48563	4.68515	2.00174	0.981029	1.55078	2.14359	-0.268405	-1.44913	-1.18761	1.70099	1.69912	1.13413
21	0.442954	1.31035	3.01992	-0.964981	-1.90113	0.655658	-1.15071	0.961323	4.01104	1.00294	-0.864053	-1.1089	0.152137	3.55842	-1.20897	0.503576	1.12911	3.99599	0.163972	-0.848914	-0.258554	-1.09775	1.0094	-0.675986	0.269952	-0.92809	-0.737108	1.14563	1.32016	0.765042	1.37834	2.61002	-0.170374	-0.198444	-1.01604	-0.171455	-0.787131	-0.98694	5.12404	3.59042	-1.93041	1.31402	0.882655	-0.584176	0.052559	-1.18761	0.0333527	1.03927	-0.962583
21.3	0.598376	2.24631	0.471464	-0.964981	-0.353699	1.62701	0.0605633	1.78827	2.13296	1.00294	-0.864053	0.315374	-1.47066	1.45093	-1.05925	0.00621712	0.201073	3.01213	0.791951	1.66639	0.920817	-0.435792	1.18964	1.5773	0.819007	-0.166225	-0.276416	0.721325	1.47457	2.58657	0.765743	3.41649	0.615968	-0.288645	-0.409448	1.78803	-1.40048	1.02349	2.71015	-0.540152	-0.284815	1.78754	1.67074	-1.53149	0.352896	-2.26727	-0.46694	1.53416	1.51535
21.6	3.08513	0.99836	0.726309	0.497111	-1.01688	0.655658	0.0605633	2.20174	2.53541	0.850977	-0.864053	0.925775	-0.45641	1.28881	-0.385522	-0.118123	0.201073	1.12009	0.6524	1.35198	0.0136082	-0.215138	-1.69434	-1.33017	0.269952	-0.789569	-0.660326	0.0848618	1.47457	1.20221	1.50086	0.850457	0.353854	-0.378847	-0.712741	0.563353	-0.378231	0.65796	4.24626	2.00174	0.0949382	1.78754	2.93167	0.994679	0.352896	-0.107966	0.0333527	1.20423	0.37169
21.9	6.50443	-0.24959	2.25538	-0.380144	0.972672	0.169986	0.464321	0.134379	1.86466	-1.12451	-0.442563	1.12924	0.760684	-0.170221	-0.0860875	0.254896	0.510418	3.5419	2.25724	0.0943233	0.376492	0.888133	0.648897	-0.0218061	0.910516	-0.443267	-0.353198	0.15558	1.16576	0.765042	0.520705	-0.322587	1.40231	-0.649452	-0.712741	1.05323	-0.582681	0.10966	1.61292	0.413057	3.6393	2.97134	2.14359	0.678908	0.803402	-0.647789	0.867174	2.35897	-1.15319
22.2	0.287532	0.374385	-1.05761	-0.380144	-0.353699	-0.801361	-0.343195	-0.692566	0.120734	1.76274	-0.864053	0.111907	-0.0507124	-1.46714	0.213347	-0.118123	1.12911	1.72554	1.69903	-0.220089	-0.0771128	0.777806	-0.612847	1.79536	1.18504	-0.720309	0.721752	-0.551601	-0.0694824	1.7851	0.153148	0.043989	-1.08777	-0.829856	-1.01604	1.29816	-0.787131	-1.71801	3.58793	0.413057	1.48737	-1.05358	1.51312	-1.84726	-0.548115	1.51151	0.867174	3.67868	0.37169
22.5	0.287532	0.374385	-0.547918	0.204692	-1.45901	0.655658	0.464321	-0.279094	-0.147564	0.0911759	-0.864053	0.111907	-0.0507124	0.478239	-2.10727	0.379236	0.201073	1.4985	-0.603557	-1.47774	-0.349275	0.777806	-2.59559	-0.821359	-1.19419	0.318598	-1.58171	-0.622319	-1.76794	-1.05649	1.74589	-0.835794	0.747025	0.252565	-0.409448	1.9105	-1.40048	1.02349	0.954586	2.00174	1.61395	1.31402	1.67074	-0.584176	-0.247778	-1.72744	0.366881	2.19401	0.562301
22.8	-1.26669	1.62233	-1.82214	-0.380144	0.530548	0.169986	2.07935	0.341114	-1.0866	2.06666	-0.442563	1.53618	-0.253562	-0.332335	-0.834673	-0.242462	-0.726958	-0.090818	0.582625	1.03756	-0.893601	-0.435792	-2.59559	-0.821359	-0.187594	-0.789569	-0.42998	-0.339447	-0.0694824	2.00368	-0.827002	-0.982424	-0.563545	-0.739654	-1.01604	2.64531	-0.173782	0.65796	-1.23986	0.730794	1.36078	-1.05358	0.882655	-0.268405	-0.247778	-1.18761	0.533646	0.379415	-0.200141
23.1	-0.645003	0.374385	-0.293072	-0.0877252	-0.574761	1.14133	0.868079	-0.0723576	-1.3549	-0.516665	-0.864053	-1.1089	-1.47066	-0.656565	-1.05925	0.00621712	-1.0363	0.0605455	1.07105	0.0943233	0.648654	0.226171	0.468648	-0.748673	0.819007	-0.443267	0.568188	-0.905192	-0.841507	-0.0364306	-0.827002	0.19062	-0.432488	-0.0180404	-0.409448	1.29816	-0.787131	0.292427	0.954586	-0.222415	1.86712	-0.580063	0.409804	-0.899948	0.352896	1.51151	-0.967232	-0.445401	-0.390751
23.4	-1.73296	-0.873564	0.216618	-0.0877252	-0.353699	-0.801361	-0.746951	0.547851	-1.89149	2.06666	-0.864053	-0.905428	-0.45641	-0.49445	1.11165	-1.11284	-1.0363	0.438954	0.443074	-0.534501	0.830096	0.115844	0.108149	1.86805	3.01523	0.457119	-0.42998	0.50917	-0.532697	0.546458	-0.336927	0.777142	1.00914	1.06438	-0.106153	-0.661327	-2.21828	0.65796	2.27126	0.413057	-0.15823	-0.580063	0.0945699	-1.53149	-1.14879	-0.107966	0.700409	1.53416	2.84963
23.7	-0.178736	2.24631	1.236	-0.672563	-0.795823	2.11268	0.464321	-2.55319	0.925625	1.1549	-0.864053	2.96045	-0.0507124	0.478239	0.288206	-0.366802	-2.27368	0.893044	0.0244215	-0.220089	0.0136082	-0.987428	-0.0720999	2.88566	1.91712	-0.0277043	0.798534	1.42851	-0.687102	0.910764	0.765743	0.410565	0.484911	0.793775	1.10702	-0.171455	0.235117	1.93733	0.296251	0.730794	-2.18358	1.07726	-0.851131	-0.268405	0.803402	-0.647789	-0.633704	0.544378	0.752912
24	-0.489581	0.686372	1.236	-1.54982	-0.353699	4.54105	0.0605633	0.961323	1.05977	0.547057	-0.864053	1.33271	-0.45641	0.316124	-3.23015	-0.864161	-0.417614	0.287591	-0.045354	3.86728	0.0136082	-1.31841	-0.612847	1.72267	1.64259	-0.99735	0.0307128	-0.127293	-0.223887	0.546458	-0.704483	0.117304	-1.34989	-0.649452	1.10702	0.195949	0.235117	0.475194	0.954586	-2.12883	0.474691	-0.343302	1.82836	-0.899948	0.803402	-1.18761	0.533646	2.85386	1.89657
24.3	0.132109	2.24631	-2.07699	-1.2574	1.4148	-0.315687	0.464321	-0.692566	-1.6232	-0.972545	-0.864053	-0.498494	0.557835	0.478239	-1.58326	-0.491142	-0.108271	-0.62059	0.6524	3.55286	-0.0771128	-1.53906	1.36989	0.268941	-0.462121	0.110817	0.952098	0.367734	2.86421	0.182153	0.765743	0.483881	-0.432488	-1.01026	1.71361	1.17569	-0.173782	0.10966	0.735141	0.730794	2.8798	2.0243	2.30121	0.0473661	-0.998621	-0.647789	0.867174	2.02905	0.37169
24.6	-1.11127	0.686372	-0.802763	-0.672563	1.85692	0.169986	-0.343195	-1.31277	-0.952455	-0.364704	-0.864053	-0.295027	-0.862109	2.58573	-0.684956	-1.11284	-1.0363	0.590317	1.28038	4.18169	1.82803	0.00551636	1.18964	1.64999	1.27655	-0.374006	0.414623	-0.480883	0.393733	-0.255014	-0.459446	0.117304	-0.563545	0.162363	0.197141	-0.906264	0.235117	-0.0731069	2.92959	0.413057	1.61395	1.31402	0.0945699	0.0473661	1.40408	1.51151	0.200117	1.53416	-0.962583
24.9	-0.334158	1.31035	1.49085	0.497111	-0.574761	-0.315687	-1.95822	-1.51951	-0.952455	-1.42843	-0.864053	-2.3297	-0.862109	1.77516	-1.05925	0.254896	-1.0363	2.25532	0.6524	1.66639	-0.258554	-0.435792	1.36989	0.632374	0.910516	-1.48217	0.491406	-0.268729	2.401	-0.400736	0.398186	0.997088	0.484911	0.613372	-0.409448	0.195949	-0.173782	0.475194	0.296251	2.63721	1.86712	-0.816823	2.14359	0.678908	0.202728	0.43186	0.366881	0.709342	0.562301
25.2	0.598376	-0.873564	0.216618	-0.964981	1.63586	-0.315687	-1.55447	-0.48583	-1.89149	-1.58039	-0.864053	-2.3297	-2.0792	3.23419	-1.88269	-1.73454	-0.108271	0.514636	-0.11513	1.35198	-0.0771128	0.115844	-0.432598	0.123567	1.27655	-0.374006	-0.199634	1.92353	1.32016	0.910764	0.765743	-0.322587	-0.170374	0.432968	0.197141	-0.416392	-0.378231	0.65796	0.515696	-1.49336	1.36078	-1.05358	1.35551	1.31045	1.70441	0.43186	0.700409	1.69912	-1.3438
25.5	-0.334158	1.31035	0.216618	0.204692	2.5201	-0.315687	-0.746951	-0.899302	-1.89149	-0.972545	-0.864053	-0.905428	-0.45641	1.61304	-0.0860875	-1.11284	-1.34565	0.665999	-0.324456	0.408736	-1.80081	-1.53906	-0.973346	0.341627	0.361461	-1.75922	-0.506762	0.862761	-1.45913	-0.255014	-0.459446	-0.982424	-0.170374	-1.46127	1.71361	-0.538859	-0.173782	0.65796	0.515696	0.730794	1.10761	0.8405	-0.851131	-0.584176	1.55424	1.51151	0.700409	3.84364	0.943521
25.8	-0.645003	-0.24959	0.216618	0.204692	2.74117	-0.801361	-1.55447	-0.0723576	-1.0866	-0.972545	-0.864053	-2.12623	-0.45641	-0.81868	0.437923	-0.491142	-0.108271	-0.696272	-0.603557	-2.42098	-0.167834	-0.656447	-0.432598	0.341627	0.635988	-0.0969646	-0.660326	0.226298	-0.687102	1.05649	0.643224	0.630511	0.747025	0.432968	2.92679	1.17569	0.0306672	0.292427	1.39348	0.413057	0.854445	1.55078	0.725038	-0.584176	-0.0976097	0.43186	0.867174	1.53416	0.37169
26.1	-0.489581	0.99836	-1.05761	-0.672563	-0.353699	-0.801361	-2.36198	0.961323	-2.15979	-0.668625	-0.864053	-2.3297	-1.26781	0.640353	-2.55642	-0.242462	0.510418	1.12009	0.373299	2.60963	-0.80288	-0.104811	0.468648	0.850434	0.635988	-1.41291	-0.81389	1.14563	1.01135	0.546458	2.35849	1.0704	0.484911	-0.739654	0.197141	-0.0489871	0.439566	-1.53524	-1.23986	0.0953214	1.9937	-0.343302	2.93167	1.94199	0.95357	2.05134	-1.134	0.214452	2.08718
26.4	0.442954	0.686372	-1.05761	-0.964981	-0.353699	0.655658	-0.343195	-2.75993	-0.952455	2.6745	-0.864053	-1.1089	-0.862109	0.640353	-1.58326	-0.864161	-0.417614	1.34713	1.35015	-0.220089	0.0136082	0.115844	1.55014	-0.167179	1.00202	1.3575	0.414623	0.0848618	0.548137	0.983625	0.643224	0.117304	0.484911	0.252565	1.41032	1.9105	-0.378231	-2.81461	-0.581529	1.04853	0.474691	-1.5271	1.98597	0.363136	-2.35014	-1.72744	-0.633704	-0.775327	-0.00953019
26.7	1.37549	0.374385	0.981155	0.497111	4.06754	-0.801361	-2.36198	-0.0723576	-1.6232	-0.668625	-0.864053	-0.905428	-1.67351	-0.49445	-1.20897	0.130557	-1.65499	1.87691	1.55948	0.723149	0.104329	0.00551636	-2.59559	0.850434	1.18504	-1.06661	-0.42998	-0.268729	-0.0694824	1.05649	1.01078	0.703826	-0.170374	0.793775	-0.712741	-0.293923	-0.173782	-1.53524	-0.800975	0.0953214	-0.411399	-2.23739	-0.535898	-0.584176	0.052559	1.51151	-0.800468	-0.445401	-1.3438
27	-0.645003	0.99836	-0.802763	-0.964981	2.74117	-0.315687	-0.343195	-0.899302	0.120734	0.395096	-0.864053	-1.51583	-0.253562	-1.95348	-0.909532	-0.366802	-1.65499	0.817362	-0.394231	1.03756	-0.439996	0.667479	-0.0720999	-0.239866	0.178443	-0.304746	-0.0460691	0.579889	1.32016	0.400736	-0.704483	0.410565	1.1402	-0.288645	-0.409448	1.9105	-0.582681	-1.53524	-1.23986	-0.540152	0.601276	0.8405	0.252187	-3.11034	2.30509	2.05134	0.0333527	0.379415	0.752912
27.3	-0.800426	1.93432	-0.547918	-0.0877252	2.29904	-0.801361	-1.95822	-0.48583	-0.281712	-0.516665	-0.864053	-2.53316	-1.26781	-0.170221	-1.28383	0.379236	-1.0363	1.27145	-0.533782	2.29521	-0.439996	0.777806	-0.0720999	-1.11211	-0.55363	-1.75922	-0.583544	-0.834474	1.62897	1.63938	-0.091889	0.117304	-1.48094	-0.288645	0.500436	1.78803	-1.40048	-0.804174	1.39348	-1.17563	1.2342	0.8405	0.725038	0.0473661	-1.74946	-0.107966	0.867174	1.86408	-0.771973
27.6	-0.178736	1.31035	-0.0382264	0.497111	-0.795823	2.59835	-1.55447	-1.51951	2.26711	-0.516665	-0.864053	-0.905428	-0.862109	0.478239	-2.10727	-1.36152	0.201073	0.287591	-1.09199	1.35198	-0.893601	0.115844	-1.15359	0.559687	-0.0960845	0.110817	-0.0460691	0.297016	-1.76794	-1.42079	-0.949521	-0.175957	-0.039317	-0.920058	-0.409448	0.685821	2.27961	1.38903	0.735141	0.0953214	1.86712	0.366978	0.409804	0.678908	0.95357	0.43186	-0.300175	4.66846	0.752912
27.9	1.53091	2.5583	-1.82214	0.497111	1.19373	0.655658	1.27184	1.16806	1.05977	0.699016	-0.864053	-1.92276	-1.06496	0.316124	-1.43354	0.130557	1.43845	-0.998999	0.163972	-0.534501	-0.349275	-1.98037	0.829146	0.196254	0.910516	0.110817	-1.27458	0.721325	1.16576	-0.0364306	-1.19456	-0.909109	-2.00517	-2.00248	-0.409448	0.685821	1.87071	-0.804174	0.515696	-0.222415	0.981029	2.26106	1.67074	-0.584176	1.25391	1.51151	0.200117	2.85386	1.70596
28.2	0.753799	1.62233	-0.802763	-0.964981	2.29904	0.169986	-1.95822	0.134379	-0.147564	-0.972545	-0.864053	-1.31236	-0.0507124	1.28881	-0.235805	-0.366802	2.05714	-0.090818	-0.324456	1.03756	-1.25648	-1.64939	-0.612847	0.0508807	0.819007	-0.0277043	1.10566	-0.905192	-1.61353	-0.109292	0.275667	-0.469218	-1.21883	-0.469049	-0.409448	-0.538859	0.0306672	0.10966	-1.23986	-2.12883	0.981029	1.07726	-0.220664	0.0473661	-0.998621	0.971685	0.700409	0.544378	1.51535
28.5	4.63936	0.686372	0.726309	1.08195	0.0884244	-0.315687	-2.36198	0.134379	0.120734	1.00294	-0.864053	0.315374	0.152137	0.964583	-2.25699	1.37395	3.60386	-0.544908	-0.184905	-1.47774	-1.25648	-0.546119	-1.51409	-0.6033	0.819007	-0.166225	1.71992	-1.25878	1.78338	-0.109292	1.62337	1.0704	-1.34989	-0.198444	1.71361	-0.661327	-0.378231	-1.71801	-1.67875	-0.857889	-0.15823	-1.05358	-0.693515	-1.84726	2.30509	0.43186	-0.800468	0.709342	-0.390751
28.8	2.1526	-0.873564	-1.05761	1.08195	1.85692	0.169986	-1.95822	-0.279094	1.99881	0.699016	-0.864053	1.12924	0.760684	2.58573	-3.23015	-0.491142	2.98517	0.287591	-0.394231	0.408736	-0.621438	0.00551636	-1.51409	-1.33017	-1.10268	-2.17478	0.568188	-0.622319	-0.0694824	-1.12935	-0.581964	-2.74199	-1.21883	-1.28086	-0.409448	0.440885	-0.378231	0.10966	0.515696	0.413057	-1.04432	0.366978	0.0945699	-0.268405	-0.548115	1.51151	-0.133412	0.379415	-1.72502
29.1	0.287532	0.99836	0.471464	-0.672563	0.75161	1.14133	-0.746951	-0.279094	1.59637	1.45882	-0.864053	-0.0915603	-0.45641	1.77516	0.213347	0.503576	0.819762	-1.52877	-1.09199	-0.534501	0.920817	-0.104811	-0.612847	-1.98435	0.269952	0.0415562	-0.276416	-0.339447	-1.30472	-2.51371	-2.90982	-1.86221	-0.301431	-1.10046	0.500436	1.78803	-0.787131	0.475194	1.83237	-0.540152	1.36078	-1.05358	-0.220664	-1.84726	0.052559	0.43186	-1.46753	0.709342	-0.200141
29.4	0.442954	3.18227	0.216618	0.497111	0.972672	0.169986	-1.95822	-1.51951	1.19392	0.547057	-0.864053	-0.498494	-1.06496	0.964583	0.138488	-0.242462	2.05714	-0.0151363	-0.184905	-1.79215	-0.439996	-0.987428	-2.59559	-0.966733	-0.00457534	-1.41291	-0.0460691	-0.763756	-2.07675	-2.36799	-1.31708	-1.20237	-2.13623	-1.64167	-1.01604	0.808289	-0.582681	-1.53524	-1.67875	1.684	1.2342	1.07726	-1.00875	-0.899948	-0.247778	-1.18761	-0.133412	0.049489	0.562301
29.7	1.84176	0.686372	1.236	0.204692	0.75161	0.655658	-1.15071	-1.72625	1.32807	-0.516665	-0.864053	0.315374	0.152137	0.316124	-1.58326	0.254896	1.74779	-1.52877	-1.99907	-1.16333	0.739375	-0.104811	-2.59559	-0.821359	0.45297	0.59564	0.721752	-0.268729	-1.92234	-3.89807	-1.56212	-0.909109	-0.694602	-0.198444	-1.01604	0.563353	1.25736	-2.26631	0.735141	-0.222415	0.72786	1.55078	-0.851131	-0.268405	0.052559	-2.26727	-0.800468	2.35897	-1.3438
[truncated: 195 more columns]

## Sheet: 2E - Exc Zscore time course Pre
Time	Excitatory Reward Phase	Excitatory Reward Phase	Same Cells During Conflict	Same Cells During Conflict
	Time course	SEM	Time course	SEM
	-0.1211	0.14336	0.132635	0.220397
	0.351451	0.218959	-0.02371	0.168206
	0.372384	0.167345	0.099882	0.262167
-6	-0.16347	0.120864	0.096248	0.141525
	-0.01773	0.129313	0.106367	0.15191
	0.094816	0.122103	0.048865	0.144021
	-0.02243	0.12684	0.128636	0.145597
	-0.14966	0.115548	-0.24634	0.135645
	0.206948	0.141184	-0.33837	0.128774
	-0.08792	0.128874	-0.05609	0.119627
	-0.19661	0.117075	-0.50273	0.130638
	-0.04439	0.152822	-0.10498	0.110421
	-0.01202	0.145985	-0.1394	0.149094
-3	0.107558	0.152582	0.261187	0.145364
	0.208183	0.154133	0.199471	0.155495
	0.137709	0.149754	0.157434	0.160252
	-0.28618	0.150731	-0.04481	0.100395
	-0.25443	0.162636	-0.03291	0.119531
	0.105452	0.160481	0.270967	0.172087
	-0.09508	0.155015	-0.04132	0.135114
	0.129148	0.138569	0.234076	0.141033
	0.177851	0.121681	0.031798	0.147104
	0.162252	0.14605	-0.0281	0.160468
0	4.25047	0.640922	2.77504	0.444878
	3.68132	0.422013	1.25125	0.430105
	2.16637	0.416339	1.33789	0.384573
	1.47686	0.43932	0.957355	0.410281
	1.49123	0.4041	1.11537	0.395447
	1.69424	0.427685	1.04755	0.315852
	1.552	0.422311	1.04306	0.346438
	1.74414	0.402304	0.955534	0.336306
	1.79601	0.386935	1.25656	0.366778
	1.21466	0.359102	0.831743	0.34184
3	1.71779	0.37971	0.635123	0.340701
	1.46758	0.368698	0.357301	0.331099
	1.11834	0.368114	0.158159	0.275925
	0.94667	0.279356	0.048329	0.252938
	1.18948	0.36308	-0.00251	0.248692
	0.701942	0.327317	0.227677	0.281676
	0.799444	0.332563	0.572742	0.276
	0.628613	0.310469	0.593811	0.277968
	0.498325	0.281727	0.062654	0.293802
	0.426383	0.240947	0.282311	0.299757
6	0.246392	0.238244	0.392789	0.265468
	0.131946	0.256321	-0.00826	0.259862
	0.3674	0.303686	-0.03451	0.231927
	0.032999	0.23263	0.006682	0.216232

## Sheet: 2F,J,P,T - AUC Avg Pressers_Non
DURING REWARD								SAME CELLS DURING CONFLICT
		Pressers		Non-pressers						Pressers		Non-pressers
Excitatory	Sustained	50		10				Excitatory	Sustained	60		0
	Fast	50		90					Fast	40		100
Inhibitory	Sustained	58.0645		22.2222				Inhibitory	Sustained	75		100
	Fast	41.9355		77.7778					Fast	25		0

## Sheet: 2G - Exc Cell Reward Pressers
Time	Time course
-6	2.5
	1.94444
	3.33333
	1.11111
	2.22222
	3.33333
	2.5
	3.33333
	5
	3.33333
-3	2.22222
	2.77778
	4.16667
	3.05556
	3.05556
	2.22222
	2.77778
	3.61111
	4.16667
	4.16667
0	6.66667
	10.5556
	12.2222
	10.2778
	12.5
	11.9444
	15.8333
	14.1667
	13.3333
	11.9444
3	12.5
	10.8333
	11.9444
	6.94444
	9.16667
	11.1111
	7.77778
	7.22222
	6.66667
	5.83333
6	7.5
0
15
30 sec

## Sheet: 2H - Exc Cell Conflict Pressers
Time	Time course
-6	5.83333
	3.88889
	4.44444
	5.55556
	2.77778
	4.44444
	4.16667
	4.16667
	3.61111
	5.55556
-3	6.11111
	6.38889
	6.66667
	5.83333
	4.16667
	4.16667
	5.27778
	5
	4.44444
	4.16667
0	8.88889
	13.3333
	15.5556
	17.2222
	15.5556
	12.2222
	14.1667
	11.9444
	12.2222
	13.6111
3	9.72222
	11.1111
	7.22222
	9.16667
	8.33333
	10
	6.94444
	5.55556
	7.77778
	7.22222
6	9.16667
0
15
30 sec

## Sheet: 2I - Data time course Pressers 
	PL	PL	PL	PL	PL	PL	PL	PL	PL	PL	PL	PL	PL	PL	PL	PL	PL	PL	PL	PL	PL	PL	PL	PL	PL	PL	PL	PL	PL	PL	PL	PL	PL	PL	PL	PL	PL	PL	PL	PL	PL	PL	PL	PL	PL	PL	PL	PL	PL
	EXPJF20 1O1	EXPJF20 1O1	EXPJF20 1O1	EXPJF20 1O1	EXPJF20 1O1	EXPJF20 1O1	EXPJF20 1O1	EXPJF20 1O1	EXPJF20 1O1	EXPJF20 1O1	EXPJF20 1O1	EXPJF125 1G2	EXPJF125 1G2	EXPJF125 1G2	EXPJF125 1G2	EXPJF125 1G2	EXPJF125 1G2	EXPJF123 4G2	EXPJF123 4G2	EXPJF123 4G2	EXPJF123 4G2	EXPJF123 4G2	EXPJF123 4G2	EXPJF123 4G2	EXPJF123 4G2	EXPJF123 4G2	EXPJF123 4G2	EXPJF123 4G2	EXPJF123 4G2	EXPJF123 4G2	EXPJF123 4G2	EXPJF123 4G2	EXPJF123 4G2	EXPJF123 4G2	EXPJF166 5M2	EXPJF166 5M2	EXPJF166 5M2	EXPJF166 5M2	EXPJF166 5M2	EXPJF166 5M2	EXPJF166 5M2	EXPJF166 5M2	EXPJF166 5M2	EXPJF166 5M2	EXPJF166 5M2	EXPJF166 5M2	EXPJF166 5M2	EXPJF166 5M2	EXPJF184 8T2
	SPK08a	SPK17a	SPK18a	SPK19a	SPK20a	SPK21a	SPK22a	SPK23a	SPK27a	SPK31a	SPK31b	SPK01a	SPK01b	SPK02a	SPK05a	SPK05b	SPK11a	SPK05a	SPK05b	SPK06a	SPK07a	SPK07b	SPK12a	SPK14a	SPK14b	SPK15a	SPK15b	SPK18a	SPK19a	SPK19b	SPK20a	SPK20b	SPK22a	SPK22b	SPK01a	SPK07a	SPK15a	SPK16a	SPK18a	SPK18b	SPK19a	SPK19b	SPK21a	SPK23a	SPK24a	SPK25a	SPK27a	SPK32a	SPK21a
-30	4.15391	1.42625	1.35164	0.317681	-4.39417	-0.223607	-0.0677243	0.0266363	0.359134	1.38312		-1.20329	-0.608766	0.232989	1.00039	-0.14576	-0.385238	-0.52318	-2.16306	-1.28495	-0.0528222	1.04949	-2.16296	-0.697071	-2.81378	0.198812	-0.429755	-0.62025	-0.987872	-0.553702	-0.193395	-1.95295	-0.457625	0.214696	-0.324893	0.826126	-0.212776	-0.504557	-2.75159	-0.418301	-0.458564	-0.961616	-1.53164	-0.505582	1.00104	-1.89429	-0.479959	-1.58455	0.940194
-29.7	3.92815	-2.43652	-0.810982	1.47289	-3.91912	-0.223607	-0.91428	-0.506087	0.73717	0.395177		-2.03314	-1.54533	0.137891	-1.12434	2.56121	0.315194	-0.52318	0.139088	0.628806	-0.757116	-0.0376313	2.18271	-1.56011	-1.37328	-0.444404	-0.188771	-1.39556	-1.97574	-0.224118	-1.27641	-0.960978	-0.861411	0.11246	-0.324893	-1.00971	0.17409	-0.985087	-2.44067	-1.52325	-1.04087	0.17714	-1.53164	-1.4686	0.0361823	1.23031	-1.35261	-1.70236	-1.41029
-29.4	4.37966	-0.6537	-0.810982	-0.259921	-5.18591	-0.223607	-0.0677243	0.0266363	0.359134	-0.263451		-0.207463	-0.920952	-1.09838	-1.03581	3.1859	-0.385238	1.48905	-1.10791	0.902201	-0.522351	0.380494	1.98518	-0.564296	-0.31691	-0.795249	-1.39369	-0.177214	-0.141125	0.171384	0.734901	-0.83698	-0.996006	0.725875	-0.324893	0.367167	0.560955	-1.62579	0.823922	-0.418301	0.269316	-0.0759168	-1.53164	-0.264829	0.0361823	-2.67544	-0.479959	-2.76265	-1.95271
-29.1	-0.361209	-1.84224	0.270327	-0.837525	-3.91912	-0.223607	0.101587	-0.772449	1.49324	-1.58071		-0.0414927	0.639983	-0.717986	-0.0619715	0.895384	-1.7861	0.684157	-0.724217	-1.01156	-1.57879	-1.12476	1.39259	-0.365133	-1.18121	-0.444404	-0.510083	-1.61708	-0.564498	0.0395501	-0.0386789	-0.960978	-0.59222	-0.705428	-0.324893	-0.0917913	-0.212776	-1.14526	-1.04156	-0.733999	0.414891	-0.328974	-1.53164	-0.0240753	-0.205032	-1.11314	1.26535	-1.82017	-2.49513
-28.8	2.1221	-1.24797	-1.35164	-0.837525	-4.07747	-0.223607	-0.91428	-1.57153	-1.53104	-0.922078		-0.207463	0.639983	0.423184	-1.3014	0.0624687	-0.618714	-1.59637	-0.148681	-1.01156	0.181943	-0.0376313	-1.57037	-0.365133	0.0672232	0.666606	0.132541	-1.2848	-0.846748	-0.224118	0.425469	-1.58096	0.484543	1.33929	-0.324893	-0.321271	-0.212776	0.937034	-0.264277	-0.418301	0.706043	-0.328974	-0.13924	0.457432	-0.446245	-0.331989	2.138	-0.877686	-0.506258
-28.5	0.541814	-0.950836	-0.270328	2.05049	-3.60243	-0.223607	-0.744969	-2.63698	-0.774972	-0.922078		0.290449	2.8253	0.423184	1.26599	1.7283	-0.618714	0.281712	-0.244603	-0.46477	0.651472	-0.372131	0.207407	-0.896234	-2.14154	0.549658	-0.590411	-0.509491	-0.564498	-1.80612	-0.348111	2.38694	0.215353	1.13482	-0.324893	0.826126	0.560955	0.296327	-1.81885	-0.891848	0.851619	-0.202445	-1.53164	-0.987089	0.0361823	-1.89429	-1.35261	-0.759876	-0.325452
-28.2	0.993325	-0.6537	-0.270328	-0.259921	-0.752155	-0.223607	-1.42221	-0.506087	3.38342	-0.922078		-0.705375	0.952171	0.518281	-1.03581	1.7283	-0.852191	-0.254882	-0.724217	0.902201	1.23838	0.129619	-0.582715	0.697071	0.451357	0.958977	0.935822	-0.398733	0.141125	-1.34471	-0.193395	-0.588986	-0.0538384	1.54376	-0.324893	1.74404	-0.599642	-0.664734	-1.19702	-1.0497	-0.312988	-0.328974	-0.13924	-2.19086	1.48346	-2.28487	-0.479959	-0.642066	0.940194
-27.9	2.34786	-0.356563	2.43295	2.6281	-2.81069	4.24853	-0.91428	-0.239725	4.51752	1.0538		-1.20329	1.57655	0.232989	1.79717	0.895384	-0.852191	-1.05977	-2.25898	0.0820179	0.299325	-0.0376313	-1.57037	0.0331938	0.931523	0.958977	-0.590411	-0.287973	-0.846748	-1.41062	-0.0386789	-1.82896	-0.861411	0.316931	-0.324893	1.28508	0.17409	-0.82491	-1.66339	-1.83894	-0.749716	0.556725	-1.53164	-0.746335	-1.65231	-0.722564	0.392695	-1.70236	-0.506258
-27.6	4.15391	0.237709	-0.810982	2.6281	-3.60243	-0.223607	-0.237036	2.15753	1.87128	-0.263451		-1.86717	-1.23314	0.518281	-1.83258	-1.39513	0.548672	-2.93785	-3.02637	0.355412	-0.170205	-0.204881	-1.17531	-0.43152	-1.85344	-0.268981	0.212869	0.265822	-0.423374	-0.421868	-0.502827	-0.960978	-1.2652	0.0102236	-0.324893	0.367167	0.560955	-0.0240267	-0.730648	-1.0497	-0.312988	-1.46773	-0.13924	-0.746335	0.277395	-1.11314	-1.35261	-1.70236	-0.506258
-27.3	0.993325	-0.0594267	-1.35164	2.6281	-2.17729	-0.223607	1.62539	0.292998	3.38342	0.395177		-0.0414927	-0.920952	-0.147401	-1.03581	-0.14576	0.548672	-1.59637	-1.4916	0.628806	-0.99188	0.0459937	-0.977777	-0.365133	0.451357	-0.561352	-0.269099	-0.287973	-0.846748	-0.0922837	-1.12169	-1.82896	-0.861411	-0.39872	-0.324893	-0.0917913	1.33469	-0.82491	0.668465	-2.15464	-0.0218365	-0.835087	-1.53164	-1.22784	-0.205032	-1.11314	-1.35261	-0.877686	-0.687064
-27	4.83117	0.534845	2.9736	4.36091	-3.91912	-0.223607	-0.91428	-0.239725	3.38342	1.38312		-0.207463	0.327797	0.803573	0.380681	1.7283	-0.618714	-1.05977	-0.724217	-1.01156	-1.34403	-1.71013	1.39259	-1.56011	-0.60501	0.257287	-1.15271	-0.509491	-0.141125	-0.487785	-0.966974	-1.82896	-0.457625	-1.11437	-0.324893	2.203	0.947821	0.13615	-0.575191	-1.52325	0.706043	-0.582031	-1.53164	-0.987089	-0.205032	-1.50372	0.392695	-2.40922	-0.325452
-26.7	3.25088	-1.24797	0.810983	0.895285	-3.28573	-0.223607	-0.406347	1.09208	5.65163	0.0658627		0.124478	-1.23314	-1.19347	-2.98348	-0.978675	-0.618714	0.013415	-0.82014	-0.191375	-1.34403	-1.29201	-0.582715	-0.896234	0.355324	-1.08762	-0.992052	-0.287973	-1.55237	-0.751453	-0.812258	-2.57294	-1.66898	-0.39872	-0.324893	0.596646	0.560955	-0.504557	-2.28522	-1.83894	0.706043	-1.3412	-0.13924	-1.9501	-0.687459	0.839737	-1.35261	-1.82017	-0.506258
-26.4	5.28269	-0.6537	2.43295	3.2057	-3.12738	-0.223607	0.60952	0.559359	6.4077	0.724491		0.456419	0.639983	-0.717986	-0.0619715	0.478926	-2.01958	-0.254882	-1.01199	1.44899	-2.04832	-1.12476	-1.17531	-0.0995817	0.739457	-0.678301	-0.831395	-0.952528	-0.282249	1.16014	-1.27641	-0.960978	-1.1306	-0.705428	-0.324893	0.367167	-0.986508	0.13615	-1.66339	-0.891848	-0.895292	-0.455502	-0.13924	1.6612	-0.928672	0.0585858	-0.479959	-0.642066	-0.687064
-26.1	2.79937	-0.0594267	0.810983	-0.259921	-1.70225	-0.223607	-0.237036	0.825721	3.00538	-0.263451		-0.207463	0.0156095	-1.19347	-0.593154	1.93653	-2.48653	0.415861	-0.82014	1.17559	0.416707	-0.539381	-0.977777	-0.497908	0.0672232	-0.152033	-0.510083	-0.841769	-0.846748	-1.01512	-0.812258	-1.08497	-1.1306	0.11246	-0.324893	1.97352	0.947821	1.09721	-2.28522	-0.102602	-0.60414	0.430197	-1.53164	-0.264829	-0.446245	-0.722564	-0.479959	-1.58455	-0.506258
-25.8	3.47664	-0.6537	0.810983	-0.837525	-2.96903	-0.223607	-0.91428	-0.239725	3.38342	-1.25139		0.124478	0.639983	-1.19347	-0.416093	0.895384	-1.7861	1.89149	0.235011	-0.738164	-0.639734	0.464119	-0.977777	-0.630683	-0.412944	-0.0935588	-0.590411	1.37341	-0.987872	0.632802	-1.89527	0.402991	0.215353	-0.194249	2.92404	1.97352	1.33469	0.456504	-1.81885	-1.52325	-1.62317	-0.835087	-0.13924	-0.505582	0.518609	-0.331989	2.138	-2.05579	-0.687064
-25.5	3.02513	-1.24797	-0.270328	2.6281	-3.91912	-0.223607	-0.91428	0.825721	1.1152	-0.922078		-0.705375	-2.1697	-0.147401	0.557742	-0.562217	0.315194	-0.389031	0.330934	0.902201	-0.404969	-0.790256	-1.17531	1.69289	2.17996	0.666606	-1.07238	0.0443035	-1.69349	0.962387	0.580185	-1.33297	-1.1306	0.419167	-0.324893	-0.0917913	0.17409	-0.985087	-1.9743	-1.0497	-1.4776	0.683253	-0.13924	-1.70935	-1.16989	-1.50372	-0.479959	-0.759876	-0.144645
-25.2	1.67059	0.237709	-0.810982	-0.259921	-3.12738	-0.223607	-1.42221	-0.239725	-1.53104	-1.25139		-1.86717	-2.79408	-0.337596	-1.12434	0.478926	-1.55262	-2.40126	-1.87529	0.628806	-0.757116	0.464119	-1.57037	1.0954	0.83549	0.140338	-0.510083	0.376581	-0.423374	-0.751453	-1.27641	-2.32495	0.349948	-0.807664	-0.324893	1.28508	-0.599642	-0.0240267	-1.9743	-1.3654	0.997195	-0.455502	-1.53164	-0.0240753	-1.16989	-0.331989	-0.479959	-1.11331	-1.41029
-24.9	3.02513	-0.950836	-0.810982	1.47289	-2.01894	-0.223607	-0.744969	-0.772449	-0.018902	0.395177		-2.69702	-0.920952	-1.95425	0.20362	1.31184	1.01563	-1.19392	-2.16306	1.17559	-0.404969	-0.623006	-1.57037	0.962622	0.355324	1.07593	-1.39369	-0.952528	-0.423374	-2.13571	0.889616	-1.58096	0.88833	0.828111	-0.324893	0.826126	-0.599642	-0.985087	-2.44067	-1.3654	0.269316	-0.455502	1.25316	1.17969	-0.446245	0.449162	-0.479959	-1.46674	0.0361614
-24.6	1.44484	-1.54511	0.810983	1.47289	-0.435458	-0.223607	-1.59152	-0.506087	-0.774972	0.395177		-0.705375	1.88873	-0.527791	-1.38993	0.687155	1.71606	-1.86466	-1.29975	-1.01156	0.181943	-1.45926	0.799999	0.630683	-0.220877	0.666606	-1.63468	-0.398733	-0.846748	-0.81737	0.270753	-1.70496	-1.39979	-1.21661	-0.324893	1.51456	-0.212776	-1.94615	-3.37342	-0.733999	1.5795	-1.08814	-1.53164	-1.70935	0.277395	-0.722564	-0.479959	-1.11331	-1.41029
-24.3	1.21908	0.237709	-1.35164	2.05049	-2.65234	-0.223607	-1.2529	0.0266363	-0.396938	0.395177		-1.53523	-0.920952	-0.717986	-1.21287	1.10361	1.71606	-2.53541	-2.06714	-1.55835	0.768854	-0.706631	-2.16296	1.75927	0.25929	0.72508	0.293198	-1.72784	-1.97574	-0.487785	0.116037	-2.57294	-0.323029	-0.296484	-0.324893	4.49779	0.560955	-0.504557	-1.81885	-0.418301	-0.0218365	-0.0759168	-0.13924	-2.43161	1.72468	-0.331989	0.392695	-0.877686	-0.325452
-24	3.47664	-1.84224	-1.89229	0.317681	-1.38555	-0.223607	-0.575658	-2.10426	-1.53104	-0.592765		-2.53105	-1.23314	-1.00328	-1.03581	-0.14576	1.48258	-4.14519	-1.39568	0.902201	1.23838	-0.288506	-1.37284	-0.962622	-0.0288099	0.315761	-0.590411	-2.17088	-2.11687	-1.87204	0.116037	-1.20897	0.619139	-0.603192	-0.324893	1.05561	-0.986508	-2.10633	-1.66339	-1.3654	-1.18644	0.0506112	-1.53164	-0.505582	-0.928672	0.449162	-0.479959	0.0647957	0.397774
-23.7	3.25088	-1.84224	-1.35164	4.36091	-0.752155	-0.223607	0.948142	-1.30517	-1.53104	0.0658627		-1.03732	-0.920952	-0.432694	-3.3376	0.687155	0.782148	-1.73052	-0.82014	1.17559	-0.757116	-1.12476	0.00987662	-0.896234	-0.31691	-0.502878	-1.15271	-1.17405	-1.55237	0.500969	-0.193395	-1.58096	-0.0538384	-0.194249	-0.324893	1.28508	-0.212776	-1.30544	-0.730648	-0.57615	-0.60414	-0.582031	-0.13924	-0.0240753	-0.687459	-1.50372	-1.35261	-0.524255	-0.867871
-23.4	0.993325	-1.24797	-0.810982	0.895285	-2.33564	-0.223607	1.11745	-2.10426	-1.15301	0.395177		-1.36926	0.327797	0.0427938	-1.56699	-2.01982	1.01563	-3.87689	-1.10791	-0.191375	-0.757116	-1.12476	-0.977777	-1.89205	0.83549	-0.736775	-0.831395	-0.62025	-1.83462	-1.14695	-1.12169	-2.69694	-2.07277	-1.93226	-0.324893	0.367167	-0.986508	-1.30544	-0.419734	1.47589	-1.62317	-0.835087	2.64556	-0.0240753	-0.928672	-0.331989	-1.35261	-0.288635	-0.506258
-23.1	1.21908	-0.356563	-0.810982	2.05049	-1.38555	-0.223607	0.270898	-0.772449	-0.396938	1.38312		-0.705375	-2.48189	-1.00328	-0.681684	0.0624687	1.01563	-2.53541	-2.25898	-0.46477	-1.34403	-1.37563	-0.780246	-0.630683	-0.124843	-0.795249	-1.715	-2.28164	-1.129	-2.13571	-1.27641	-1.58096	-1.53439	-0.807664	-0.324893	0.367167	-1.76024	0.616681	-2.28522	-1.3654	-1.62317	-0.0759168	-1.53164	0.938938	-1.89353	-0.722564	0.392695	0.771657	-0.867871
-22.8	3.02513	-0.6537	-0.810982	0.317681	-3.12738	4.24853	-1.2529	0.559359	0.73717	-0.592765	65535	-1.53523	-1.85751	-1.66896	-0.947276	1.10361	0.782148	-0.52318	-1.20383	1.99578	-1.81356	-1.79376	-1.37284	-0.497908	-0.797077	-1.02915	-1.95599	-2.28164	-0.282249	-1.01512	-0.812258	-2.32495	-1.53439	-1.21661	2.92404	0.367167	0.17409	-0.504557	-1.50793	-0.57615	-1.04087	1.44242	-0.13924	-0.746335	-0.446245	-1.11314	-1.35261	-0.759876	0.578581
-22.5	5.28269	-1.84224	-1.35164	4.36091	-2.65234	-0.223607	-1.08359	-2.10426	-1.15301	-1.25139		-0.0414927	-2.48189	-0.908181	-1.47846	0.687155	1.48258	-1.99881	-2.45083	-1.28495	-1.46141	-1.20838	-2.95308	-2.09121	-1.18121	-1.37999	-0.911724	-1.61708	0.141125	-2.00387	-2.2047	-2.44894	-3.55332	-1.83002	-0.324893	-0.321271	-0.986508	-0.985087	-0.886105	-0.260451	0.414891	-0.202445	1.25316	0.457432	-0.205032	-0.722564	-0.479959	-0.406445	0.578581
-22.2	2.34786	0.237709	-1.35164	1.47289	-2.81069	-0.223607	-1.2529	-1.57153	-0.774972	-0.263451		-1.20329	0.952171	-0.242498	-0.947276	0.478926	1.94953	-1.99881	-0.724217	-0.738164	-2.04832	-1.04113	-0.780246	-1.22817	-0.412944	-0.853724	-0.992052	-1.39556	-0.141125	-1.74021	-2.04999	-1.45697	-1.93818	-2.0345	-0.324893	0.596646	0.560955	-0.34438	-1.35248	0.213097	1.72507	-1.08814	-1.53164	0.938938	-0.446245	0.0585858	-1.35261	-1.82017	-0.144645
-21.9	4.60542	-0.356563	-0.810982	0.895285	-2.65234	-0.223607	0.948142	-0.772449	1.1152	1.38312		-1.7012	-3.41845	-0.337596	-1.74405	0.0624687	1.71606	-1.19392	0.139088	0.0820179	-2.1657	-0.372131	-0.385185	-1.36095	-2.81378	-1.43847	-0.831395	-0.398733	-1.69349	-0.619619	-0.812258	-2.44894	-2.07277	-2.0345	-0.324893	1.05561	-0.599642	-1.30544	-0.575191	-0.102602	0.706043	-0.582031	-0.13924	-0.505582	0.0361823	-0.722564	-0.479959	-1.93798	-1.41029
-21.6	4.37966	0.831982	-0.810982	3.7833	-1.70225	-0.223607	0.270898	-1.83789	1.87128	1.71243		-2.03314	-1.23314	1.75455	-1.21287	-0.562217	1.01563	-2.8037	-1.87529	-1.28495	-1.10926	-0.372131	-2.16296	-1.49372	-0.31691	-1.61389	-1.55435	-0.62025	-1.129	-0.0263667	-1.89527	-4.4329	-1.2652	-1.01214	-0.324893	-0.321271	0.560955	-1.46562	0.513008	-0.57615	0.12374	0.0506112	-0.13924	-1.4686	0.759823	-1.89429	3.01065	-0.288635	-0.687064
-21.3	1.44484	0.237709	-0.810982	2.05049	-2.49399	-0.223607	-0.237036	-0.772449	-1.15301	-1.91002		-0.539404	0.327797	0.613379	-3.3376	-0.353989	-0.15176	-2.26711	-1.4916	0.0820179	2.41221	-0.204881	0.799999	1.29456	1.12359	0.842029	-0.188771	0.376581	0.705623	-1.47654	1.19905	-2.32495	1.02293	1.13482	-0.324893	-1.46867	-0.599642	-0.664734	-1.04156	-0.733999	0.851619	0.683253	-0.13924	-0.505582	0.0361823	0.839737	-1.35261	-0.0530146	0.0361614
-21	0.767569	-0.6537	-1.35164	-0.837525	-4.23582	-0.223607	-0.91428	-0.239725	-0.396938	-0.922078		-1.36926	-1.23314	0.708476	-0.858745	-0.353989	0.315194	-3.072	0.0431653	-0.46477	0.0645602	0.296869	-2.16296	-1.29456	-0.412944	-0.0935588	-0.269099	-1.39556	-1.55237	-1.60837	-0.348111	-3.93691	0.0807572	-0.807664	-0.324893	-0.0917913	-0.599642	0.13615	-1.04156	0.0552471	-1.04087	0.303668	1.25316	0.938938	0.518609	0.449162	0.392695	-1.70236	-0.506258
-20.7	1.44484	-1.24797	-0.810982	1.47289	-1.06885	-0.223607	-0.91428	-0.506087	0.73717	-0.592765		0.78836	-1.23314	0.708476	1.17745	-1.81159	0.782148	-3.74274	-0.82014	-2.10513	1.35577	-0.372131	-0.780246	-0.43152	0.25929	1.1344	0.132541	-0.952528	-0.423374	-3.2563	-2.51413	-3.68891	-0.996006	-0.0920125	-0.324893	-0.78023	0.17409	-0.82491	1.29029	-0.260451	-0.749716	0.683253	-1.53164	1.17969	0.518609	0.839737	1.26535	-1.23112	0.0361614
-20.4	1.21908	0.237709	-0.810982	-0.259921	-2.96903	-0.223607	-0.406347	-0.506087	-1.15301	-0.263451		1.78418	0.639983	0.803573	0.292151	-2.6445	1.48258	-1.73052	-1.20383	0.628806	0.534089	-0.455756	-1.96543	0.43152	-0.89311	0.491183	-0.188771	-1.17405	0.141125	-0.421868	-1.43112	-0.960978	-0.59222	-0.807664	-0.324893	0.137687	0.947821	0.776857	-1.04156	0.213097	-1.4776	-0.455502	-0.13924	-0.264829	1.00104	1.62089	-0.479959	-0.170825	-0.506258
-20.1	0.767569	-0.356563	0.810983	2.05049	-3.12738	-0.223607	-1.2529	1.09208	1.87128	0.724491		-0.539404	0.639983	-0.242498	0.380681	-0.978675	1.01563	-2.66956	-1.58752	-0.191375	0.299325	-0.623006	-1.17531	1.6265	-2.14154	0.081864	-0.911724	-0.398733	-1.97574	-1.14695	0.270753	-1.70496	-1.39979	-1.52332	-0.324893	0.137687	0.560955	0.13615	-1.9743	-1.3654	-0.167412	-0.0759168	-0.13924	1.90195	1.00104	-0.331989	-1.35261	-1.34893	-0.867871
-19.8	3.02513	-0.356563	-0.270328	-1.41513	-2.49399	-0.223607	-0.744969	0.292998	1.1152	0.0658627		0.124478	2.8253	0.0427938	-0.858745	-0.562217	2.41649	-2.13296	-0.244603	-0.46477	0.0645602	-0.539381	-1.7679	0.165969	-0.989143	-0.0935588	-0.0281147	0.819617	0.564498	-0.290034	-1.27641	-3.81291	-0.457625	-1.11437	-0.324893	-0.55075	0.560955	2.5388	-1.04156	-0.891848	1.28835	-0.0759168	-1.53164	0.698184	1.72468	-1.11314	-0.479959	0.300416	0.0361614
-19.5	2.57362	-0.6537	-0.270328	2.05049	-1.2272	-0.223607	-1.59152	-1.83789	2.24931	2.04175		-1.36926	-0.296578	1.08887	-1.38993	-0.353989	1.71606	-1.59637	-1.68345	1.72238	-1.57879	-0.706631	-0.977777	1.69289	1.60376	-0.0350845	-0.510083	-0.398733	-0.141125	-1.47654	-1.27641	-2.57294	-0.188433	0.11246	-0.324893	1.05561	2.49528	1.73792	0.823922	-0.891848	0.706043	-0.328974	1.25316	1.17969	1.00104	-1.11314	0.392695	-1.34893	-0.144645
-19.2	2.34786	-0.356563	-0.810982	-1.99273	-3.12738	-0.223607	-1.42221	-1.30517	0.359134	1.38312		-1.36926	-1.85751	0.328086	-0.681684	-0.14576	0.782148	-1.46222	-0.724217	-0.191375	-3.33953	-0.0376313	-2.36049	-0.564296	-0.124843	-0.38593	-1.15271	-0.841769	0.141125	-0.158201	0.580185	-1.45697	0.215353	-0.500956	-0.324893	-1.23919	1.72155	-0.82491	0.202094	0.370946	-0.0218365	-0.455502	1.25316	0.457432	0.277395	0.839737	2.138	-0.759876	-0.144645
-18.9	0.767569	0.831982	-0.270328	0.317681	-1.86059	-0.223607	-0.575658	1.89117	-0.774972	0.724491		-0.0414927	-1.23314	-0.242498	-0.239032	0.895384	-0.15176	-0.254882	-0.0527576	0.355412	-0.99188	-0.873881	0.00987662	-0.232357	1.02756	-0.210507	-1.15271	-1.61708	-0.282249	0.237301	-1.89527	-1.58096	-1.2652	-0.296484	-0.324893	0.367167	-0.212776	0.616681	-0.419734	0.0552471	-1.4776	0.809782	-1.53164	1.90195	0.0361823	0.449162	-1.35261	-0.759876	-1.04868
-18.6	3.25088	-1.54511	-1.35164	-0.259921	-4.55252	-0.223607	-1.08359	0.825721	1.1152	-0.263451		-0.539404	3.44967	-0.622888	1.08892	0.895384	-0.852191	-1.59637	-1.20383	0.628806	0.181943	-0.372131	-2.55802	-1.16179	0.54739	-1.20457	0.132541	-1.06329	-0.987872	-0.81737	-0.348111	0.774982	-0.726816	0.419167	-0.324893	0.367167	0.560955	1.57774	-1.35248	0.686644	-1.4776	0.0506112	-0.13924	0.216678	0.0361823	-0.331989	0.392695	-2.05579	-1.04868
-18.3	2.1221	1.42625	-1.35164	-0.259921	0.0395869	-0.223607	-1.42221	-1.03881	-0.018902	0.724491		-1.03732	0.327797	-0.622888	-0.681684	-1.60336	0.548672	0.818306	-0.148681	-0.46477	1.00362	-0.372131	-0.187654	0.365132	1.21962	-0.327456	-1.15271	-0.398733	0.423374	-1.47654	-0.193395	-0.83698	-0.457625	-0.194249	-0.324893	1.51456	-0.599642	1.09721	-1.04156	-0.891848	-1.04087	-0.202445	2.64556	1.42045	0.277395	-1.11314	-1.35261	-2.88046	0.397774
-18	2.57362	-0.356563	-0.270328	1.47289	-0.752155	-0.223607	-0.91428	-1.57153	1.1152	0.395177		0.456419	-0.920952	0.0427938	-1.03581	-1.1869	1.48258	-1.19392	-1.68345	-0.191375	0.651472	1.21674	-0.187654	0.497908	-0.31691	0.0233897	0.373526	-0.952528	-1.129	-0.421868	0.734901	1.51896	-0.59222	-0.194249	-0.324893	0.137687	0.17409	0.296327	-0.575191	-0.102602	0.997195	-0.328974	-1.53164	1.6612	-0.205032	-0.331989	1.26535	-1.34893	0.397774
-17.7	0.316058	0.534845	-0.270328	-0.837525	-2.01894	-0.223607	-1.76084	-1.03881	1.87128	-0.922078		0.124478	0.952171	-0.147401	0.292151	0.0624687	0.315194	2.83053	0.714625	0.0820179	0.0645602	-0.204881	-0.187654	1.75927	0.739457	-0.0935588	0.373526	1.48417	0.705623	1.75339	-0.348111	1.89096	1.42671	-0.194249	-0.324893	0.137687	0.947821	0.937034	-0.886105	-1.3654	-0.458564	-1.08814	-1.53164	-0.746335	1.96589	-1.50372	1.26535	-2.88046	-1.04868
-17.4	1.67059	1.72339	-0.810982	2.05049	-2.33564	-0.223607	-1.76084	0.292998	-0.396938	0.395177		-0.871345	-1.54533	-0.0523037	-1.74405	1.10361	1.94953	0.550009	-1.68345	-0.191375	-0.287586	-1.37563	0.207407	0.763459	1.89186	0.081864	-0.269099	1.92721	0.423374	1.0283	-1.58584	-0.216995	-0.323029	-1.11437	-0.324893	-0.0917913	-0.986508	-0.664734	-0.730648	-1.0497	0.414891	-0.708559	-1.53164	2.38346	1.72468	-1.89429	-0.479959	-0.995496	-0.325452
-17.1	1.89635	1.72339	-1.35164	1.47289	-1.06885	-0.223607	-1.42221	0.825721	-0.396938	-0.263451		-1.36926	-0.920952	0.993769	-0.504623	-0.770446	0.081717	-1.46222	-1.20383	0.902201	-1.34403	-0.706631	-1.17531	1.16179	0.25929	-0.970672	-0.510083	0.376581	-0.987872	-1.87204	-1.74055	0.402991	-2.20737	-1.01214	-0.324893	-0.321271	0.560955	-0.82491	-2.12976	-0.260451	-0.60414	-0.202445	-0.13924	2.38346	-1.16989	0.0585858	2.138	-1.82017	0.397774
-16.8	0.541814	0.534845	0.810983	0.895285	-2.01894	-0.223607	-1.08359	1.6248	0.73717	-0.922078		-1.7012	-0.296578	0.232989	-2.89495	-0.978675	0.315194	0.415861	0.0431653	0.355412	0.299325	-0.455756	-0.187654	-0.962622	1.69979	-0.152033	-0.510083	-0.509491	0	-1.01512	1.81791	-1.33297	0.349948	-0.194249	-0.324893	0.596646	1.72155	-0.34438	-3.37342	-1.52325	0.414891	1.3159	-0.13924	0.938938	0.0361823	0.0585858	0.392695	-2.1736	-0.687064
-16.5	2.57362	-0.950836	0.270327	-0.259921	-2.01894	-0.223607	-0.237036	-1.83789	-0.396938	1.38312		0.622389	1.57655	0.898671	-1.56699	0.478926	-1.08567	-0.657328	-2.7386	-0.191375	-0.404969	-0.957506	-0.582715	-0.0995817	-0.701044	-0.327456	-0.590411	-0.177214	-2.11687	-1.08104	-1.74055	-0.83698	-1.39979	-1.52332	-0.324893	0.826126	-0.986508	-0.664734	-1.81885	-1.52325	-0.0218365	0.430197	-0.13924	-0.264829	0.518609	0.0585858	0.392695	-2.64484	-1.7719
-16.2	1.44484	0.237709	-1.89229	1.47289	0.356284	-0.223607	-0.91428	-1.30517	-0.396938	4.01763		-0.705375	0.327797	-1.09838	-0.947276	-1.39513	0.081717	-1.99881	0.810548	-1.01156	-2.28309	-0.706631	-0.582715	-1.89205	-0.60501	-0.853724	-1.87566	-1.72784	-1.83462	-1.41062	-1.89527	-1.58096	-1.80358	-1.72779	-0.324893	0.367167	1.33469	0.616681	-0.730648	-1.0497	-1.62317	0.809782	-1.53164	-1.22784	1.24225	-1.11314	-1.35261	-1.93798	0.578581
-15.9	1.67059	2.91194	-1.35164	-0.259921	-2.96903	-0.223607	-1.42221	-1.03881	-0.396938	3.68831		-0.207463	-1.23314	-1.57386	-0.416093	1.7283	-0.15176	-2.66956	0.139088	0.0820179	0.181943	-1.04113	-0.385185	0.630683	1.41169	-0.152033	-0.911724	-0.177214	0.282249	-1.14695	-0.657542	-1.70496	-1.2652	0.0102236	-0.324893	1.28508	-0.212776	-0.82491	-1.81885	0.0552471	-0.60414	1.69548	-0.13924	2.86496	0.277395	0.839737	-1.35261	-2.52703	-0.687064
-15.6	3.25088	-0.6537	-1.35164	0.895285	-1.70225	-0.223607	-0.744969	1.09208	-1.53104	2.37106		-1.7012	1.88873	-2.04935	1.17745	1.7283	-1.08567	-2.26711	0.0431653	-0.191375	-1.34403	0.0459937	-1.96543	0.896234	0.643423	-1.08762	-1.07238	0.376581	0.141125	-0.553702	1.19905	-1.82896	-0.861411	-0.807664	-0.324893	1.05561	0.947821	0.937034	-1.35248	-1.68109	-1.33202	0.17714	-1.53164	2.38346	0.518609	2.01146	-1.35261	-2.29141	-0.506258
-15.3	3.25088	1.12912	-0.810982	2.6281	-0.910503	-0.223607	-0.91428	1.35844	-0.774972	0.395177		-2.53105	0.952171	-0.622888	-0.858745	2.97767	-1.08567	-0.120734	-2.64267	0.355412	-0.99188	-0.204881	1.78765	0.232357	1.31566	-1.49694	-0.670739	-0.0664553	1.129	-0.421868	0.580185	-2.57294	-0.996006	-0.705428	-0.324893	0.137687	1.33469	0.456504	-0.10882	1.31804	-1.76875	-0.455502	-1.53164	-0.0240753	1.72468	0.449162	1.26535	-1.70236	1.66342
-15	2.1221	0.534845	-1.89229	0.317681	-1.06885	-0.223607	-0.406347	1.09208	-0.396938	1.38312		-2.03314	-0.920952	-1.28857	0.026559	0.687155	-2.72001	1.3549	-0.532372	-0.191375	1.121	-0.873881	0.404938	-0.232357	0.0672232	-0.0935588	0.935822	0.819617	-0.423374	-0.685536	-0.193395	0.526988	-0.861411	1.54376	-0.324893	-0.55075	0.17409	-1.14526	-0.264277	-1.20755	1.5795	0.430197	-1.53164	-0.505582	-1.89353	-0.722564	-1.35261	-3.58732	-0.325452
-14.7	2.1221	0.831982	-1.35164	-0.837525	-0.910503	-0.223607	0.440209	1.09208	1.1152	0.0658627		-0.871345	0.639983	0.0427938	0.911863	0.270698	-2.25305	-3.3403	-0.532372	-1.55835	0.181943	-1.12476	0.00987662	0.697071	0.931523	1.01745	0.293198	0.819617	-1.55237	-0.224118	0.116037	-1.20897	-0.188433	-0.194249	-0.324893	-1.00971	1.72155	-0.34438	-0.575191	1.31804	-0.167412	1.18937	-1.53164	1.42045	-1.16989	-1.11314	-0.479959	-1.70236	-0.325452
-14.4	5.28269	-1.54511	0.810983	2.05049	-2.17729	-0.223607	-0.237036	-0.239725	-1.15301	0.724491		-0.373433	-1.23314	0.232989	1.62011	0.270698	-1.08567	-1.73052	-1.39568	0.628806	-0.287586	-0.0376313	-0.187654	-0.298745	-0.89311	-0.444404	-0.670739	0.0443035	0.705623	-0.81737	-1.58584	-1.58096	-0.323029	-0.39872	-0.324893	-1.23919	1.72155	0.616681	-0.419734	-1.20755	-0.458564	1.56895	-1.53164	0.938938	-0.687459	-1.50372	0.392695	-1.93798	0.759387
-14.1	1.44484	-0.0594267	-0.270328	0.895285	-0.752155	-0.223607	-1.59152	-1.03881	-1.15301	0.724491		-0.705375	-1.85751	-1.85916	-0.947276	1.93653	-2.01958	-1.46222	-1.77937	-1.28495	1.23838	-0.706631	-1.7679	-1.02901	-0.701044	0.491183	-1.31336	-0.62025	0.987872	-0.487785	-2.04999	-1.33297	-0.726816	0.725875	-0.324893	0.137687	-1.76024	0.13615	-0.730648	-0.891848	0.706043	1.44242	-1.53164	1.42045	0.759823	-0.331989	-0.479959	-0.0530146	-1.5911
-13.8	1.21908	0.237709	0.270327	2.05049	-2.65234	4.24853	-1.42221	2.15753	2.62735	1.38312		0.124478	0.327797	-2.52484	0.646272	0.270698	-2.72001	-0.254882	-0.244603	0.355412	-0.0528222	-0.455756	-0.780246	-1.02901	-0.124843	-0.795249	0.293198	-2.17088	0.282249	-0.751453	0.734901	1.89096	-1.2652	-0.807664	-0.324893	-0.321271	0.560955	-0.184203	-0.575191	-0.57615	-1.33202	2.20159	-1.53164	1.90195	0.277395	1.62089	-0.479959	-2.88046	-0.687064
-13.5	1.21908	-0.0594267	-0.270328	-1.99273	0.989678	-0.223607	-0.744969	-0.506087	-1.15301	-0.592765		1.95015	1.88873	-1.19347	1.26599	1.10361	-1.7861	-2.40126	-1.87529	-0.46477	-0.874498	0.213244	-1.7679	-0.298745	-0.124843	-0.561352	-0.269099	-0.952528	-0.705623	-1.27879	-0.812258	-2.69694	-0.188433	-0.807664	-0.324893	0.137687	1.72155	0.296327	-1.66339	-0.733999	2.45295	0.556725	-1.53164	-0.505582	0.277395	1.62089	1.26535	-0.288635	-1.04868
-13.2	1.21908	-0.0594267	-1.35164	0.895285	-1.2272	-0.223607	-0.91428	0.559359	1.87128	-0.922078		0.78836	-0.608766	-2.04935	-0.150502	0.895384	-2.01958	1.0866	-0.82014	1.99578	2.88174	0.965869	-0.780246	1.75927	0.0672232	1.42677	0.694838	1.48417	0.423374	0.237301	0.270753	1.51896	0.88833	1.44153	-0.324893	0.596646	0.947821	0.296327	-1.04156	0.0552471	1.28835	-0.708559	1.25316	0.216678	-0.687459	0.839737	-1.35261	-1.11331	0.216968
-12.9	3.92815	2.31766	-0.810982	2.6281	0.197935	-0.223607	-1.59152	0.0266363	1.49324	0.724491		1.45224	-0.608766	-1.57386	-0.239032	-1.81159	-2.25305	-1.86466	0.426857	-1.28495	1.82529	0.380494	-1.17531	0.43152	0.54739	0.608132	0.373526	-0.287973	0	-0.290034	-0.966974	-1.08497	-0.0538384	-0.194249	-0.324893	-0.55075	0.560955	-0.184203	-1.19702	-0.733999	-1.33202	0.683253	-1.53164	0.216678	-0.205032	1.62089	-1.35261	-2.1736	-0.867871
-12.6	0.767569	0.534845	-1.35164	0.895285	-1.06885	-0.223607	-0.237036	1.6248	4.51752	-0.592765		-0.539404	-0.296578	-1.66896	-0.858745	-0.14576	-2.25305	-1.32807	0.426857	-0.46477	0.299325	0.380494	-0.187654	-0.298745	-0.60501	0.958977	0.132541	0.265822	-0.846748	0.237301	-1.12169	-2.57294	-0.996006	-0.194249	-0.324893	-0.0917913	0.17409	0.776857	-1.66339	-1.52325	-1.62317	-0.0759168	-1.53164	-1.4686	-1.89353	0.449162	0.392695	-2.1736	0.216968
-12.3	0.316058	0.831982	0.270327	-0.837525	-1.38555	-0.223607	-1.08359	2.15753	3.00538	-1.58071		0.622389	-1.23314	-0.337596	1.00039	-0.353989	-1.7861	-1.19392	1.48201	-1.01156	1.23838	1.21674	-2.36049	-0.0995817	1.31566	0.842029	0.293198	-1.06329	-0.846748	-2.00387	0.580185	-1.70496	-1.1306	0.0102236	-0.324893	-0.321271	0.560955	-0.985087	-0.575191	-1.99679	0.560467	-0.0759168	-1.53164	-1.9501	-0.687459	0.449162	-0.479959	-1.23112	-1.7719
-12	0.541814	0.831982	-1.35164	0.317681	0.356284	-0.223607	-0.91428	-0.506087	-0.774972	-0.592765		1.1203	-0.296578	1.46926	-1.21287	2.14476	-2.72001	-3.47445	-1.10791	0.628806	-0.404969	0.714993	-1.7679	-1.36095	-0.31691	0.0233897	-0.911724	-1.17405	-0.564498	-2.00387	-2.2047	-4.0609	1.56131	-0.39872	-0.324893	1.05561	-1.37337	-0.184203	-0.886105	-0.891848	-0.312988	1.06284	-1.53164	-0.0240753	1.48346	-0.331989	-1.35261	-0.170825	-1.22948
-11.7	0.0903025	0.237709	-0.810982	-2.57034	-0.752155	-0.223607	-1.2529	-0.506087	0.359134	-0.263451		-0.705375	-0.608766	0.232989	0.557742	1.52007	-2.48653	-1.86466	0.52278	1.44899	0.181943	0.129619	-1.57037	-1.22817	-1.37328	-0.327456	-0.429755	-1.17405	-0.282249	-1.54246	0.116037	-0.0929977	-2.07277	-0.39872	-0.324893	0.137687	-0.986508	1.57774	-0.886105	-1.83894	-0.60414	0.17714	-0.13924	0.216678	0.0361823	1.23031	-0.479959	-0.406445	-0.867871
-11.4	1.44484	-0.6537	-0.270328	-0.259921	0.356284	-0.223607	-1.59152	0.559359	-0.774972	0.395177		-0.871345	-1.54533	-0.622888	0.646272	0.478926	-2.48653	1.3549	0.0431653	0.0820179	0.886236	1.55124	-0.582715	0.630683	-0.89311	0.140338	0.0522131	0.0443035	0.987872	0.698719	1.6632	-0.0929977	-1.2652	-0.296484	-0.324893	0.137687	-0.599642	0.937034	-1.81885	-0.733999	-1.33202	0.17714	-1.53164	-0.0240753	0.759823	0.839737	2.138	-1.58455	-0.144645
-11.1	0.316058	0.237709	-1.35164	-0.259921	0.197935	-0.223607	-0.406347	-0.506087	-0.396938	0.724491		-0.0414927	0.0156095	-0.147401	0.026559	1.31184	-2.25305	-1.59637	-1.20383	0.0820179	1.23838	1.46762	2.57778	-0.365133	-0.701044	0.315761	-0.108443	-0.0664553	-0.282249	-0.0922837	2.90092	-0.960978	0.753735	-1.31884	-0.324893	2.43248	-0.599642	0.616681	-2.90705	-0.733999	0.269316	0.0506112	-1.53164	-0.264829	-1.16989	-1.11314	0.392695	-1.46674	0.759387
-10.8	0.767569	-1.24797	0.270327	0.317681	-1.2272	-0.223607	0.778832	-2.10426	2.24931	-0.592765		1.61821	-0.608766	-1.95425	1.8857	0.0624687	-3.42044	-2.53541	-1.87529	-1.01156	-0.874498	0.464119	-1.37284	-0.497908	0.0672232	-0.152033	-0.0281147	-1.61708	-1.83462	-1.08104	-3.133	-0.712983	-1.2652	0.11246	-0.324893	1.28508	-1.76024	-0.0240267	-1.50793	-1.3654	-0.60414	-0.582031	-1.53164	0.457432	1.24225	-0.722564	-0.479959	-0.406445	-0.325452
-10.5	0.0903025	1.42625	-1.35164	-1.99273	-2.17729	-0.223607	2.64125	-0.239725	0.359134	0.724491		0.622389	-0.608766	-1.19347	0.026559	-0.14576	-1.31915	-1.05977	-0.916063	-0.191375	-1.57879	-1.45926	0.00987662	-1.69289	-0.989143	-1.14609	-0.349427	-0.841769	-1.27012	-0.949204	-1.74055	-0.464989	-2.74575	-0.9099	-0.324893	0.826126	0.947821	-0.0240267	-1.81885	-0.260451	1.28835	-0.202445	-1.53164	-1.22784	1.00104	-0.331989	-1.35261	0.536037	1.66342
-10.2	2.1221	-0.0594267	-1.35164	-0.837525	-1.2272	-0.223607	2.30263	-0.772449	-0.774972	1.38312		-0.539404	-0.608766	-1.19347	1.62011	-0.353989	-0.15176	-1.19392	1.38609	1.17559	-1.10926	-0.204881	-2.16296	-0.497908	0.0672232	-1.55541	-1.715	-1.72784	-1.27012	-0.553702	0.580185	-0.216995	-2.47656	-1.01214	-0.324893	1.97352	0.560955	1.25739	-1.81885	-0.891848	-0.749716	-1.46773	-1.53164	-1.4686	0.518609	-0.331989	0.392695	0.0647957	0.216968
-9.9	4.37966	-1.24797	-1.89229	-0.259921	-0.118761	-0.223607	2.64125	-2.10426	-0.774972	-0.592765		0.124478	3.44967	-0.432694	1.79717	0.478926	-0.15176	-0.925625	-1.77937	-0.738164	-0.874498	0.129619	-2.36049	-0.962622	-0.60501	-0.736775	-0.188771	-1.50632	-1.41125	-1.47654	-2.51413	-2.44894	-2.34196	-0.807664	-0.324893	1.97352	-0.212776	-1.30544	-0.575191	-1.20755	-0.895292	-0.0759168	-1.53164	-0.505582	-1.4111	-0.722564	1.26535	-0.995496	0.397774
-9.6	3.25088	-0.356563	-0.810982	3.2057	-3.28573	-0.223607	1.62539	-1.30517	-0.396938	1.0538		-1.36926	0.327797	-0.908181	-1.38993	-0.353989	-0.15176	-0.657328	-1.39568	1.72238	-0.0528222	-0.873881	-1.37284	-0.0995817	-0.989143	0.374235	0.935822	1.15189	-0.423374	-0.158201	0.270753	-1.58096	-1.2652	-1.31884	2.92404	0.596646	0.17409	-0.82491	-2.12976	-1.68109	0.414891	0.303668	-1.53164	-0.0240753	0.277395	0.839737	-0.479959	-0.0530146	-0.506258
-9.3	5.7342	0.534845	0.270327	-0.259921	-0.910503	-0.223607	0.101587	0.559359	-1.15301	1.71243		1.28627	0.952171	-1.00328	0.026559	0.270698	-1.31915	0.550009	0.0431653	-1.28495	-0.287586	-0.204881	-0.977777	-0.763459	-1.08518	-0.0350845	-0.108443	-0.841769	0.141125	0.435052	-0.193395	-0.83698	-1.1306	0.316931	-0.324893	1.74404	-1.37337	-0.34438	-0.730648	-0.733999	0.269316	-0.202445	-0.13924	-0.746335	0.759823	0.449162	0.392695	-0.877686	-0.687064
-9	2.57362	-0.6537	-0.270328	0.895285	2.41481	-0.223607	1.28676	0.559359	-0.774972	2.70037		2.61404	0.639983	-1.66896	0.11509	-0.978675	-2.01958	0.684157	-0.436449	0.355412	-0.404969	0.0459937	-1.57037	2.75509	-0.989143	1.07593	0.534182	0.0443035	0.564498	1.42381	-0.966974	-1.08497	-1.1306	0.316931	-0.324893	2.66196	-2.14711	0.616681	-2.12976	0.528795	1.43392	-0.455502	-1.53164	-0.264829	-0.928672	0.0585858	-0.479959	-0.524255	0.940194
-8.7	0.993325	-0.0594267	0.270327	2.05049	1.30637	-0.223607	1.62539	2.42389	-0.018902	1.38312		3.60986	3.76186	-0.432694	-1.92111	-0.562217	-2.01958	-0.925625	0.330934	-2.37853	-1.57879	-1.45926	0.602469	0.165969	0.0672232	-0.619827	-0.992052	0.376581	-0.705623	0.369135	-0.348111	1.02298	-1.1306	-1.01214	-0.324893	1.05561	-1.76024	-0.184203	-1.35248	0.0552471	0.560467	-0.835087	-1.53164	-0.0240753	0.0361823	0.449162	3.01065	-0.995496	0.216968
-8.4	1.89635	2.31766	-1.35164	0.895285	1.30637	-0.223607	-0.575658	-0.239725	0.73717	0.0658627		2.11612	2.51311	-1.28857	-1.38993	-0.770446	-1.55262	-1.32807	-1.4916	-0.191375	-0.639734	-0.623006	-0.385185	-0.232357	1.02756	-0.502878	1.09648	-0.841769	-1.41125	-0.355951	-0.966974	-2.32495	-1.1306	-0.9099	-0.324893	0.596646	0.560955	-0.82491	-1.81885	-0.260451	-1.62317	-0.961616	-1.53164	-0.746335	-0.446245	0.839737	-1.35261	-2.40922	0.578581
-8.1	0.0903025	1.12912	-0.270328	0.895285	2.25647	-0.223607	-0.575658	0.0266363	-1.15301	-0.922078		-0.705375	1.57655	-1.76406	2.06276	-0.978675	-0.385238	1.48905	-0.340526	-1.01156	-1.93094	-0.706631	-1.96543	0.298745	-0.508977	-0.38593	0.534182	-0.952528	-0.564498	-0.685536	-1.74055	-0.0929977	-0.457625	0.11246	-0.324893	0.367167	-0.599642	-0.985087	-0.886105	-0.891848	-0.312988	-0.0759168	-0.13924	0.457432	0.0361823	-0.722564	-0.479959	-1.46674	-0.144645
-7.8	2.57362	-0.356563	-1.35164	3.7833	1.30637	-0.223607	-1.08359	0.825721	-0.018902	-2.23933		-0.207463	-1.23314	-1.19347	2.85953	-0.353989	0.081717	1.3549	0.139088	1.99578	-0.404969	-1.04113	1.78765	-0.564296	-0.124843	-0.561352	-0.831395	-0.841769	0.423374	0.435052	-0.0386789	0.0309991	-0.323029	1.03258	2.92404	0.826126	-0.599642	0.616681	-1.19702	-0.260451	-0.895292	1.3159	-0.13924	-1.9501	0.277395	-0.331989	-1.35261	0.300416	0.759387
-7.5	1.44484	-1.84224	-0.270328	0.317681	-2.65234	-0.223607	-1.59152	-1.30517	-0.774972	-0.592765		-0.207463	-1.54533	0.708476	1.79717	-0.978675	-0.385238	2.15979	-0.0527576	-0.191375	1.35577	0.464119	-0.187654	1.69289	1.12359	1.66067	1.17681	0.155063	0.141125	1.55564	1.35376	2.13895	3.04186	3.28177	-0.324893	0.137687	-0.599642	-1.62579	-1.9743	0.528795	-0.312988	-1.08814	-0.13924	-0.505582	0.277395	-0.331989	0.392695	-1.34893	-1.04868
-7.2	1.21908	0.237709	-0.810982	2.05049	1.78142	-0.223607	-0.575658	-0.506087	-0.018902	-1.91002		-0.373433	0.639983	1.27906	1.53158	0.270698	0.081717	-1.46222	1.29016	0.0820179	0.886236	0.296869	-0.780246	0.564296	0.25929	0.842029	-0.108443	0.376581	-0.282249	1.55564	0.580185	-1.08497	0.215353	2.15718	-0.324893	-0.321271	0.17409	-0.985087	-0.264277	1.16019	-1.33202	0.17714	-1.53164	-1.22784	-0.928672	-1.11314	0.392695	1.83195	-0.325452
-6.9	0.767569	-1.24797	-1.89229	2.05049	-2.01894	-0.223607	0.440209	0.292998	0.73717	-0.263451		-0.539404	0.0156095	0.232989	2.41688	1.31184	-0.385238	2.15979	-0.436449	-1.28495	-0.0528222	-0.790256	-0.977777	0.630683	-0.60501	-0.678301	0.534182	-0.509491	0.987872	0.369135	1.04433	0.650985	0.215353	0.62364	-0.324893	1.05561	0.17409	1.25739	-0.575191	-1.68109	0.12374	1.18937	6.82276	0.216678	0.759823	2.01146	0.392695	0.771657	-1.04868
-6.6	1.44484	-0.356563	-0.270328	-0.259921	-0.593807	-0.223607	0.948142	-2.37062	-0.396938	0.0658627		-0.705375	-0.608766	-0.0523037	0.469211	-1.1869	0.081717	-1.32807	-1.01199	-0.738164	-0.639734	-1.20838	0.207407	-0.0995817	-0.797077	-0.268981	-0.0281147	0.0443035	1.41125	1.22605	-1.27641	1.64296	-0.457625	-0.603192	-0.324893	0.367167	-0.212776	0.937034	-0.10882	-1.3654	-0.895292	0.17714	-1.53164	-1.70935	0.0361823	1.23031	2.138	0.300416	0.578581
-6.3	3.92815	0.237709	-1.35164	3.7833	0.672981	-0.223607	0.778832	2.15753	-0.774972	-0.922078		-0.0414927	2.51311	0.898671	0.292151	-0.353989	-0.15176	0.818306	-1.4916	1.17559	-2.63523	-2.46276	-0.187654	-0.763459	-0.989143	-1.20457	-1.715	-1.72784	-0.846748	0.698719	0.425469	-1.58096	-1.66898	-0.9099	-0.324893	1.28508	-0.212776	-0.82491	0.668465	-1.52325	-0.0218365	-0.0759168	-1.53164	-0.505582	1.24225	-0.722564	1.26535	0.653847	-0.144645
-6	0.993325	-1.24797	0.810983	0.895285	-0.27711	-0.223607	0.270898	1.35844	-0.774972	-0.592765		0.456419	0.327797	0.423184	1.08892	0.478926	-1.31915	-0.657328	-0.340526	-1.83174	-0.757116	-1.54288	-0.977777	0.232357	2.85219	-0.152033	-0.429755	-0.73101	-0.564498	-0.0922837	-2.2047	-0.0929977	-0.323029	-0.705428	-0.324893	0.367167	0.947821	1.09721	0.0466373	0.0552471	2.30738	0.556725	2.64556	-1.22784	0.277395	2.01146	-1.35261	0.418226	0.578581
-5.7	-0.812721	-0.0594267	0.270327	-0.259921	0.672981	-0.223607	-0.406347	-0.506087	-0.018902	0.0658627		-0.0414927	-0.920952	1.08887	0.11509	2.35298	0.315194	0.818306	0.714625	-0.738164	0.0645602	0.0459937	1.19506	1.16179	0.739457	-0.736775	0.293198	0.265822	0.705623	-0.553702	0.270753	-0.83698	-0.726816	0.214696	-0.324893	0.367167	2.10842	-0.34438	0.668465	-0.260451	-0.312988	-1.08814	-0.13924	1.17969	-0.205032	0.839737	1.26535	0.418226	0.759387
-5.4	2.1221	-0.950836	-0.810982	1.47289	-1.2272	-0.223607	-0.575658	0.559359	-0.018902	-1.25139		-1.36926	-0.920952	-0.908181	0.646272	0.895384	-2.01958	1.6232	-0.340526	-1.01156	0.299325	-0.623006	0.602469	0.829846	-0.0288099	0.374235	0.453854	1.59493	-0.282249	1.81931	-0.0386789	1.39497	1.15752	-0.194249	-0.324893	-0.55075	0.560955	0.456504	-1.19702	-0.733999	-0.312988	-1.59426	-1.53164	0.938938	-0.928672	0.0585858	-1.35261	1.94976	-0.144645
-5.1	0.993325	1.42625	0.270327	-0.837525	0.197935	-0.223607	-0.0677243	0.825721	1.1152	-0.263451		0.290449	1.57655	-0.813083	-1.3014	-0.978675	1.2491	-0.657328	-0.82014	0.0820179	0.651472	0.798618	0.602469	2.09121	0.83549	1.19287	1.25713	1.04113	0.423374	1.95114	1.35376	0.526988	1.29212	1.13482	-0.324893	-0.321271	-0.212776	0.296327	-1.66339	-0.102602	-0.0218365	-0.455502	-1.53164	-0.987089	1.48346	-0.331989	0.392695	1.12509	0.0361614
-4.8	0.316058	1.12912	0.810983	-0.837525	-0.27711	-0.223607	0.440209	0.0266363	-0.018902	0.0658627		-1.03732	-1.54533	-1.19347	1.08892	-0.14576	-1.08567	-0.52318	-0.532372	0.628806	-1.93094	-0.957506	-1.37284	-2.35676	-0.989143	-1.43847	-1.15271	-0.952528	-0.564498	-0.685536	-0.348111	0.774982	-1.1306	-1.31884	2.92404	-0.78023	0.560955	-0.34438	0.202094	-0.102602	0.12374	0.556725	-0.13924	-0.264829	-1.16989	-1.11314	-1.35261	-0.288635	-1.5911
-4.5	-0.812721	-0.6537	0.810983	-1.41513	-1.06885	-0.223607	1.11745	-0.239725	-1.15301	1.71243		1.78418	-0.608766	0.423184	-1.38993	1.7283	-0.618714	0.147563	-0.436449	-0.738164	-0.639734	-0.957506	1.59012	-0.564296	-1.27724	-1.20457	-0.992052	-0.841769	0.564498	-0.290034	-1.27641	-1.20897	-2.07277	-0.705428	-0.324893	0.137687	0.560955	-0.34438	-1.35248	-0.418301	0.560467	0.303668	-0.13924	-0.746335	0.0361823	0.449162	0.392695	1.47852	-0.144645
-4.2	0.316058	-1.54511	0.810983	0.317681	0.0395869	-0.223607	2.30263	-1.57153	0.73717	0.395177		-0.0414927	0.639983	-0.242498	0.380681	0.270698	-0.618714	-0.389031	-0.340526	-0.738164	-0.874498	-1.37563	0.00987662	-0.43152	-0.60501	-0.619827	-0.670739	0.708858	0.141125	-0.355951	0.734901	-0.712983	-0.323029	-1.31884	-0.324893	-0.78023	-0.212776	-1.30544	0.202094	-0.57615	-1.62317	0.17714	-1.53164	-0.505582	-0.928672	0.0585858	2.138	0.418226	-1.7719
-3.9	-1.26423	-0.950836	-1.35164	-0.837525	0.356284	-0.223607	-0.406347	-1.03881	1.1152	-0.922078		-1.36926	-2.48189	-1.28857	0.734802	0.0624687	0.315194	1.75735	-1.68345	-0.738164	-1.34403	-0.539381	-0.385185	-0.298745	-1.85344	-0.853724	-2.43796	-1.17405	-1.27012	-0.0922837	-0.348111	-1.08497	-0.59222	-1.01214	-0.324893	-1.69815	-0.599642	1.41756	0.202094	0.0552471	-0.167412	0.0506112	-0.13924	2.86496	0.0361823	0.449162	0.392695	-0.0530146	0.940194
-3.6	0.0903025	-0.356563	0.810983	0.317681	1.30637	-0.223607	-0.744969	-0.239725	0.73717	0.0658627		-1.20329	0.639983	-1.47877	-0.504623	0.0624687	-0.15176	0.952455	0.52278	0.628806	-1.22665	-1.04113	-1.7679	-0.165969	0.643423	-0.38593	0.453854	-0.73101	-0.987872	-0.553702	-0.812258	0.0309991	-0.457625	-0.9099	-0.324893	-1.23919	0.17409	-0.0240267	0.357551	0.686644	0.560467	-0.328974	-0.13924	0.457432	1.00104	-1.50372	-0.479959	0.0647957	0.940194
-3.3	-1.48999	1.12912	-0.810982	-0.259921	-0.435458	-0.223607	-0.575658	-0.772449	-0.396938	0.0658627		0.622389	-0.920952	-1.76406	-0.0619715	-1.1869	-1.08567	0.684157	-1.77937	1.99578	0.299325	0.296869	-0.977777	1.02901	-0.124843	-1.02915	0.0522131	-0.0664553	-2.25799	-1.54246	0.270753	-1.70496	-0.0538384	0.828111	-0.324893	-0.78023	-0.212776	1.57774	2.68941	2.10729	-1.33202	2.70771	1.25316	0.216678	0.277395	2.01146	-0.479959	1.2429	0.940194
-3	1.89635	1.42625	-0.270328	0.317681	1.78142	-0.223607	-1.08359	0.559359	-1.15301	-0.263451		0.124478	0.327797	-1.09838	0.557742	0.0624687	0.081717	0.550009	1.00239	1.44899	0.886236	0.547744	-0.385185	0.630683	0.355324	0.432709	0.293198	-0.509491	1.27012	1.48972	1.81791	0.774982	1.02293	2.25941	-0.324893	-1.00971	-1.37337	-0.504557	0.823922	2.10729	-0.749716	-0.582031	-0.13924	0.216678	-0.687459	0.449162	-0.479959	-1.46674	2.02503
-2.7	0.0903025	0.534845	-0.810982	2.05049	1.78142	-0.223607	-0.0677243	-1.03881	-1.53104	-0.922078		1.45224	0.0156095	0.518281	-0.0619715	0.687155	-0.385238	-0.120734	0.810548	0.0820179	1.59053	1.30037	-0.977777	0.0995816	-0.797077	2.59626	1.98009	2.25948	-0.141125	0.435052	2.12734	1.14697	1.42671	1.13482	-0.324893	1.28508	-1.37337	-0.34438	-0.264277	0.370946	-0.0218365	-0.961616	-0.13924	0.216678	0.759823	-0.331989	0.392695	-0.0530146	-1.22948
-2.4	-0.135453	-0.356563	-1.35164	-0.837525	0.989678	-0.223607	-1.08359	0.825721	0.359134	-0.592765		-1.03732	0.952171	0.613379	-0.327563	-0.770446	0.315194	0.013415	1.48201	1.44899	1.121	0.631368	0.207407	-0.43152	0.451357	1.1344	0.935822	1.70569	-0.423374	0.698719	0.116037	0.774982	1.96509	1.44153	-0.324893	0.137687	-0.599642	0.456504	-0.10882	0.844494	1.14277	-0.328974	-0.13924	-0.505582	2.68953	-1.50372	-1.35261	-0.642066	-0.506258
-2.1	-0.812721	0.237709	0.270327	-0.259921	0.831329	-0.223607	-0.575658	1.09208	-1.15301	0.0658627		1.61821	-0.608766	0.898671	0.20362	-0.770446	1.71606	0.415861	0.52278	-0.46477	0.416707	-0.288506	1.39259	0.0995816	-0.124843	1.1344	-0.349427	-0.62025	0.423374	0.171384	-0.812258	0.154996	0.753735	0.214696	-0.324893	-0.0917913	0.947821	-0.0240267	-0.419734	-0.260451	-0.60414	-0.582031	1.25316	-0.264829	0.759823	-0.722564	0.392695	-1.34893	0.759387
-1.8	-0.135453	-0.356563	-0.810982	0.317681	0.197935	-0.223607	-0.744969	0.0266363	-0.018902	-0.922078		-0.705375	0.639983	0.518281	1.17745	-0.353989	1.94953	-0.120734	1.00239	0.355412	1.35577	0.714993	0.799999	0.165969	-1.18121	0.432709	-0.188771	-0.398733	-0.282249	-0.355951	-0.0386789	2.13895	0.0807572	-0.0920125	-0.324893	1.05561	-0.599642	-1.30544	-0.575191	-0.733999	0.269316	-0.202445	-0.13924	-1.22784	-0.687459	-1.11314	1.26535	-0.995496	-0.687064
-1.5	0.993325	-0.950836	2.43295	1.47289	-1.38555	-0.223607	-1.59152	-1.03881	-0.774972	-0.592765		-0.539404	0.952171	1.37416	-1.38993	-1.81159	0.315194	-0.254882	1.96162	1.17559	1.35577	2.38749	0.00987662	1.29456	0.163257	0.72508	0.212869	-0.73101	1.41125	0.962387	0.116037	0.526988	-0.323029	-0.500956	-0.324893	0.596646	-0.599642	-2.58686	0.202094	-2.15464	2.01623	0.93631	-0.13924	-0.746335	-0.446245	0.0585858	-0.479959	0.536037	-0.867871
-1.2	-0.135453	1.42625	-0.810982	-0.259921	-0.752155	-0.223607	0.440209	2.15753	2.62735	-0.922078		-0.705375	0.0156095	1.27906	-2.09817	-0.978675	-0.15176	0.550009	-1.10791	0.355412	0.181943	0.296869	0.00987662	-0.564296	0.0672232	-0.327456	1.33746	-0.177214	-0.564498	0.237301	-0.0386789	-0.340992	-0.59222	-0.500956	2.92404	1.28508	-0.212776	1.25739	1.60121	-0.891848	-1.33202	0.556725	1.25316	-0.505582	-0.928672	-0.331989	0.392695	-0.170825	0.397774
-0.9	-1.03848	0.534845	0.810983	-1.99273	-0.752155	-0.223607	1.7947	0.292998	-0.018902	0.724491		1.28627	0.639983	0.232989	-1.03581	-0.353989	0.315194	-0.925625	-0.244603	-0.738164	-0.404969	-0.372131	1.59012	-1.02901	0.54739	-0.0935588	-0.751067	-0.287973	2.25799	-0.421868	0.116037	-0.712983	0.215353	0.419167	-0.324893	2.43248	-0.986508	-0.0240267	-0.264277	1.00234	-0.167412	-0.0759168	-0.13924	-0.264829	-0.205032	-0.331989	-0.479959	-1.70236	-0.867871
-0.6	-0.361209	-1.24797	0.270327	0.317681	-1.5439	-0.223607	0.440209	-1.57153	0.73717	2.70037		0.124478	0.952171	0.613379	1.08892	-0.14576	-0.15176	-1.32807	0.235011	-0.191375	-0.0528222	-0.455756	-0.977777	-0.962622	0.25929	-0.561352	-0.670739	0.598099	-0.141125	-1.41062	-0.657542	-1.08497	-0.996006	0.62364	-0.324893	0.137687	2.10842	-0.0240267	-0.10882	-0.733999	0.12374	1.56895	-0.13924	1.42045	-1.4111	1.23031	-0.479959	0.0647957	-0.506258
-0.3	-0.812721	0.831982	-1.35164	0.317681	-0.435458	4.24853	1.11745	0.292998	-0.396938	1.38312		0.290449	0.327797	0.803573	1.08892	0.895384	1.01563	-2.53541	-0.628295	-1.01156	-0.99188	1.13312	-0.187654	-0.829847	0.0672232	-0.619827	0.373526	-0.952528	0.282249	-1.41062	-0.348111	-0.464989	-0.323029	-1.01214	-0.324893	-0.55075	-0.986508	0.616681	-1.04156	-0.260451	-0.458564	-1.21467	-0.13924	-0.264829	0.277395	-0.331989	1.26535	-0.995496	0.940194
0	4.83117	-1.24797	-1.35164	9.55934	-0.910503	-0.223607	-0.237036	-0.239725	-0.018902	7.31076		0.78836	-1.85751	-0.622888	6.22369	11.9315	-2.48653	-2.93785	-1.4916	0.902201	5.81629	2.80562	-1.57037	2.95425	2.37202	3.82421	1.98009	1.59493	1.55237	-0.0263667	0.425469	-0.588986	2.50348	3.48625	-0.324893	-1.69815	2.10842	2.21845	3.62215	-0.57615	-2.35105	2.58118	2.64556	-1.9501	2.44832	-0.331989	-1.35261	-1.11331	-0.144645
0.3	9.57204	-1.54511	-0.810982	8.98174	2.57316	-0.223607	-1.42221	0.559359	-1.53104	-2.56865		-2.36508	-3.10626	-0.527791	1.62011	5.47642	-2.48653	-2.93785	-2.16306	-0.738164	1.35577	-0.288506	-2.16296	1.0954	1.79582	1.60219	0.534182	0.0443035	-1.129	-0.619619	-1.12169	-2.69694	-0.457625	0.11246	-0.324893	-3.53398	1.72155	0.937034	6.42037	-0.418301	-2.0599	-0.202445	1.25316	-4.11688	0.518609	-2.28487	0.392695	-0.406445	0.397774
0.6	6.41146	-1.84224	-1.35164	3.7833	2.88986	-0.223607	-1.76084	-0.772449	-1.53104	-1.58071		-2.86299	-3.73064	-0.147401	-0.770215	0.478926	-2.25305	-0.791476	-0.916063	0.902201	2.06006	0.965869	-0.780246	0.763459	0.83549	1.95304	1.33746	1.26265	-1.41125	-1.34471	0.425469	1.39497	1.02293	2.05494	-0.324893	-2.84554	0.560955	-0.34438	5.17672	-1.3654	-2.93335	0.17714	-0.13924	-3.15387	-0.446245	-1.89429	1.26535	-2.88046	0.578581
0.9	7.31449	0.534845	-1.35164	5.51611	0.831329	-0.223607	-1.59152	1.09208	0.359134	1.0538		-2.53105	-2.79408	-1.28857	0.380681	0.0624687	0.315194	-1.59637	-1.01199	-1.28495	-0.0528222	-0.121256	-1.37284	0.630683	0.25929	0.257287	-0.510083	-0.177214	-0.846748	-1.01512	-0.348111	-2.44894	0.88833	0.11246	2.92404	-2.15711	0.17409	-1.30544	6.26492	-0.260451	-2.49663	0.556725	2.64556	-2.43161	-0.928672	-1.11314	-0.479959	-1.23112	-0.506258
1.2	6.86298	-0.0594267	-0.270328	4.93851	-1.5439	-0.223607	-1.42221	0.292998	-0.774972	1.71243		-1.86717	-3.73064	-1.09838	0.292151	-3.06096	-0.15176	-3.47445	-1.39568	0.628806	1.23838	1.30037	0.00987662	-0.497908	0.643423	0.608132	-0.510083	-0.398733	0.705623	-1.01512	0.580185	-3.68891	0.88833	2.46389	-0.324893	-1.69815	-1.37337	-0.82491	3.15578	-0.260451	-0.895292	0.809782	-0.13924	-2.19086	-0.446245	0.839737	-1.35261	-0.524255	-0.506258
1.5	8.21751	-0.0594267	-1.35164	4.36091	-0.27711	-0.223607	-1.2529	0.292998	2.24931	2.04175		-1.20329	-1.54533	-1.19347	-0.239032	-2.43628	0.081717	0.281712	0.235011	1.99578	1.23838	0.464119	-2.55802	0.298745	2.37202	1.3683	0.694838	0.598099	-0.141125	0.764636	0.425469	0.402991	1.8305	1.13482	-0.324893	-0.321271	-0.986508	-0.664734	3.15578	-0.891848	-1.91432	0.303668	-0.13924	-1.22784	1.72468	0.839737	2.138	-0.877686	1.66342
1.8	8.21751	-0.356563	0.810983	2.05049	0.197935	-0.223607	-0.575658	2.69025	-0.774972	1.0538		-0.207463	-1.85751	-1.09838	-1.74405	-0.978675	1.94953	-0.52318	0.426857	0.0820179	0.886236	0.296869	0.00987662	1.29456	-0.220877	0.958977	-0.269099	-0.398733	0.564498	0.105467	0.270753	-0.83698	2.09969	1.74824	-0.324893	-1.46867	0.947821	1.09721	3.62215	-0.57615	-2.20548	0.430197	-0.13924	-2.43161	-0.446245	-0.722564	-1.35261	-0.759876	0.940194
2.1	7.31449	-0.356563	-0.270328	1.47289	-0.910503	-0.223607	-0.744969	1.35844	-1.53104	1.38312		-1.36926	-1.23314	0.0427938	-0.416093	-1.39513	-0.15176	-0.925625	-0.724217	3.36275	5.58153	2.05299	-1.37284	0.497908	-0.508977	1.83609	1.09648	1.37341	-0.141125	-0.883287	0.116037	-2.07695	3.17645	4.71308	-0.324893	-0.0917913	0.17409	-0.184203	2.84486	0.370946	-0.749716	-1.21467	2.64556	-2.19086	0.518609	-1.11314	-1.35261	-0.995496	-0.867871
2.4	9.12053	-2.43652	-1.35164	4.36091	0.0395869	-0.223607	-1.59152	0.292998	-0.018902	1.0538		-1.86717	-1.23314	-0.242498	0.380681	-2.01982	2.41649	2.02564	1.00239	1.44899	4.64247	0.714993	0.602469	-0.298745	2.37202	1.1344	1.17681	-1.72784	0.846748	1.09422	2.12734	2.26295	3.04186	5.32649	-0.324893	-0.78023	-0.212776	-0.82491	2.22304	-0.733999	-1.18644	0.809782	5.43036	-2.67236	1.00104	-0.722564	-0.479959	-2.52703	-0.687064
2.7	8.89478	-1.24797	-0.810982	2.6281	0.356284	-0.223607	-1.59152	-1.83789	1.1152	-0.922078		-1.86717	0.327797	-1.38367	1.17745	-2.85273	1.01563	-0.791476	0.139088	1.17559	0.768854	0.380494	-0.582715	1.16179	0.739457	0.783555	0.132541	-0.0664553	1.27012	0.566886	1.97263	0.0309991	1.42671	2.56612	-0.324893	-0.78023	-0.212776	-1.78597	1.75666	-1.68109	-1.04087	-0.708559	-0.13924	-1.9501	0.277395	1.62089	-0.479959	-2.1736	0.940194
3	11.1523	0.237709	-0.810982	-0.259921	-1.2272	-0.223607	-1.76084	0.825721	-0.396938	-0.263451		-2.03314	-0.608766	-2.04935	-1.47846	-1.60336	2.41649	-0.52318	0.810548	-1.01156	0.651472	0.798618	0.207407	-0.232357	-0.220877	1.54372	-0.670739	-0.73101	0.564498	0.632802	2.12734	0.0309991	1.6959	1.33929	-0.324893	1.28508	-0.599642	-0.34438	2.22304	-0.260451	-1.76875	0.430197	-0.13924	-1.22784	-0.928672	2.79261	-1.35261	-1.70236	-0.867871
3.3	8.89478	0.237709	-0.270328	0.895285	-0.593807	-0.223607	-0.744969	0.559359	-0.774972	1.0538		-1.86717	-0.296578	-2.42974	-0.416093	-2.85273	3.81735	-1.59637	-0.916063	0.355412	-0.757116	-0.706631	-1.37284	0.43152	1.02756	-0.502878	0.935822	-0.398733	-0.282249	-0.355951	-0.193395	-2.69694	-1.39979	-1.11437	2.92404	0.137687	1.33469	-0.664734	0.357551	-1.52325	-0.458564	-0.0759168	1.25316	-2.67236	-0.205032	0.0585858	-1.35261	-1.58455	0.759387
3.6	8.66902	0.534845	0.270327	2.05049	-0.118761	-0.223607	-0.91428	3.22297	0.73717	-0.592765		-1.36926	-0.608766	-1.95425	-1.47846	-3.68565	6.3856	2.42809	-0.916063	-0.738164	0.299325	1.21674	0.602469	-1.36095	2.27599	0.783555	-0.108443	-0.509491	0.846748	-1.60837	-1.12169	-0.340992	-1.66898	0.828111	-0.324893	-0.55075	0.17409	-1.30544	-0.575191	-0.418301	-0.60414	0.430197	2.64556	-2.19086	0.518609	0.449162	-0.479959	-0.406445	0.578581
3.9	7.31449	1.12912	-0.270328	2.6281	1.14803	-0.223607	-0.744969	2.42389	0.73717	-1.25139		-2.03314	-1.54533	-2.33464	-1.21287	-1.81159	6.3856	-2.40126	-1.97121	-1.83174	-0.287586	1.04949	-2.16296	-0.43152	1.21962	0.315761	1.57845	-1.06329	-0.987872	-0.81737	-2.51413	-2.20095	-0.323029	-0.39872	-0.324893	-1.00971	1.72155	-0.664734	-2.12976	-2.15464	-1.91432	-0.0759168	-0.13924	-2.43161	0.518609	0.449162	-0.479959	0.536037	0.940194
4.2	6.41146	-0.6537	-0.270328	2.6281	-2.65234	-0.223607	-0.91428	1.09208	2.24931	-1.91002		-1.03732	1.26436	-2.14445	-2.54082	-2.01982	8.95385	1.22075	-0.82014	1.17559	1.70791	-0.790256	0.404938	0.896234	1.89186	0.608132	-1.47402	-0.73101	0.141125	-0.0263667	-0.657542	0.278993	1.42671	0.828111	-0.324893	0.137687	0.560955	-0.0240267	-3.0625	-0.891848	-2.6422	1.18937	-1.53164	-3.15387	-0.205032	-0.331989	-1.35261	0.418226	0.216968
4.5	7.08873	1.12912	-1.35164	0.895285	-2.81069	-0.223607	-1.2529	0.559359	-0.774972	-0.922078		-2.36508	-0.608766	-1.28857	-1.83258	-2.85273	4.98474	1.6232	-0.340526	-0.191375	0.416707	-0.623006	0.00987662	0.0331938	-1.37328	0.140338	1.41779	-1.50632	-0.564498	1.35789	1.81791	-0.712983	2.09969	3.58848	-0.324893	-1.46867	0.947821	-0.504557	-3.83979	-1.0497	-1.18644	-0.582031	-0.13924	-1.4686	-1.16989	-1.11314	-0.479959	-1.23112	-0.687064
4.8	8.21751	0.237709	1.35164	3.7833	-2.49399	-0.223607	-1.2529	2.95661	4.51752	-1.25139		-1.03732	0.327797	-1.95425	-2.45229	-1.39513	3.58387	-1.73052	0.906471	-0.46477	2.06006	0.0459937	1.78765	0.896234	0.451357	2.18694	0.694838	0.48734	-0.423374	-1.21287	1.81791	0.278993	2.36888	4.81531	-0.324893	0.137687	2.49528	-1.14526	-3.0625	-1.3654	-1.4776	-0.961616	-0.13924	-0.505582	0.0361823	-1.50372	0.392695	-1.70236	-1.04868
5.1	7.99175	0.534845	1.35164	2.6281	-2.33564	4.24853	-1.42221	0.825721	3.76145	-1.58071		-0.373433	0.327797	-0.908181	2.771	-1.39513	1.48258	2.83053	-1.10791	1.44899	1.47315	0.0459937	-0.187654	1.16179	0.355324	1.48525	-0.0281147	1.37341	-1.129	0.764636	0.425469	1.02298	2.09969	3.0773	-0.324893	0.367167	-0.599642	-0.985087	-3.21796	-0.891848	-0.458564	0.303668	1.25316	-0.746335	-0.687459	0.0585858	1.26535	-1.23112	-0.325452
5.4	9.57204	2.02053	0.270327	-3.14794	-1.38555	-0.223607	-1.2529	2.95661	1.1152	-1.91002		1.1203	-1.54533	-1.66896	-0.150502	-1.39513	4.2843	-1.99881	-1.68345	1.17559	2.29482	-0.455756	-0.977777	0.43152	1.50772	1.30982	0.212869	-0.177214	-0.282249	-0.685536	-2.2047	-1.45697	2.50348	1.74824	-0.324893	-0.0917913	-0.212776	-0.0240267	-3.68433	-1.0497	-1.04087	0.556725	1.25316	-0.746335	1.48346	0.839737	-1.35261	-1.70236	-0.867871
5.7	7.54024	-0.6537	-0.810982	4.36091	-0.910503	-0.223607	-1.42221	1.35844	-0.774972	-0.922078		-0.539404	0.327797	-1.47877	-1.56699	-2.01982	7.08603	-0.925625	-0.244603	0.0820179	2.88174	0.129619	0.602469	-0.763459	0.83549	1.01745	-0.670739	1.48417	-0.987872	0.764636	-0.812258	-3.93691	2.23429	2.66836	-0.324893	0.826126	-0.599642	-0.985087	-2.90705	-0.891848	-0.0218365	-0.202445	-0.13924	-0.746335	-0.205032	-1.50372	-1.35261	-1.93798	-1.41029
6	5.7342	-0.356563	0.270327	-0.259921	0.356284	4.24853	-0.91428	0.825721	0.73717	-1.25139		-1.36926	-1.23314	0.0427938	-1.56699	-1.81159	6.15212	0.818306	0.330934	1.44899	2.41221	0.129619	0.799999	0.564296	1.21962	0.842029	-0.831395	-0.62025	-0.564498	-0.81737	-0.657542	0.154996	2.36888	1.03258	-0.324893	-0.321271	-0.212776	-0.985087	-1.9743	-1.3654	-0.749716	-0.708559	1.25316	-0.264829	1.00104	-2.28487	-0.479959	-0.995496	-1.04868
6.3	8.21751	-0.950836	0.810983	0.895285	-0.910503	-0.223607	0.101587	1.89117	1.1152	0.724491		-0.705375	1.57655	0.0427938	-0.504623	-3.06096	5.68517	-2.53541	-0.532372	0.902201	0.416707	-0.623006	-0.385185	-0.896234	0.451357	0.432709	-0.269099	-1.39556	-0.282249	-0.224118	-1.27641	-1.95295	-1.2652	1.646	-0.324893	1.51456	0.947821	-0.664734	-2.75159	-0.891848	-2.49663	-0.0759168	-0.13924	-0.746335	-0.205032	-0.331989	0.392695	-1.82017	0.216968
6.6	7.31449	-0.356563	0.810983	1.47289	-1.5439	-0.223607	-1.2529	0.292998	-0.018902	0.0658627		-1.86717	1.26436	-0.147401	-0.681684	-1.39513	8.72037	0.550009	-1.39568	0.628806	-0.522351	-0.0376313	-1.7679	0.365132	0.0672232	0.081864	-0.188771	1.59493	-1.129	-0.81737	-0.966974	-2.82093	-0.996006	1.646	-0.324893	1.05561	0.947821	0.456504	-3.21796	-2.15464	-1.62317	-1.3412	-1.53164	0.698184	-0.687459	-0.331989	1.26535	-2.52703	1.84423
6.9	6.18571	-2.43652	0.810983	-0.259921	-0.435458	-0.223607	-1.2529	1.09208	0.73717	0.395177		0.290449	0.952171	-0.717986	1.79717	-1.81159	8.01994	-1.32807	-1.20383	1.44899	0.299325	0.0459937	-0.582715	-0.232357	0.739457	-0.736775	-0.992052	2.25948	1.129	0.171384	-0.812258	-1.58096	-0.323029	1.646	2.92404	1.51456	-0.599642	-0.0240267	-2.90705	-0.733999	-1.76875	-0.835087	-1.53164	-0.505582	1.48346	0.0585858	-1.35261	-2.40922	-0.144645
7.2	9.34629	-0.0594267	1.35164	2.6281	-2.01894	4.24853	-1.08359	1.6248	3.00538	0.395177		-0.539404	0.952171	-0.813083	-0.239032	-0.770446	8.48689	-2.13296	-1.29975	0.902201	0.299325	-0.0376313	0.404938	0.564296	0.355324	0.783555	0.132541	-0.952528	-1.27012	-0.949204	-1.89527	-2.57294	0.349948	1.23706	-0.324893	1.97352	1.33469	0.616681	-3.0625	-1.20755	-1.18644	0.430197	1.25316	-2.19086	0.518609	1.62089	-0.479959	-2.64484	0.216968
7.5	8.44327	0.534845	0.270327	0.317681	0.0395869	-0.223607	-1.59152	3.22297	1.87128	1.0538	65535	2.11612	2.51311	-0.337596	0.026559	-1.81159	5.91864	-1.19392	0.330934	1.72238	1.121	0.714993	0.404938	-1.56011	2.75616	0.900503	0.855494	1.04113	0	0.369135	-1.58584	0.650985	1.8305	4.09966	-0.324893	0.596646	-0.212776	-2.10633	-3.52887	-1.83894	-0.458564	0.0506112	-0.13924	-0.746335	-0.928672	-1.50372	-1.35261	-2.29141	0.940194
7.8	9.7978	0.534845	-0.810982	0.317681	-0.435458	-0.223607	-1.42221	3.7557	1.49324	0.395177		1.95015	-1.23314	-0.622888	1.79717	1.31184	3.3504	-0.657328	-0.148681	1.72238	1.23838	0.714993	-0.780246	0.896234	0.355324	-0.0935588	0.775166	-0.62025	-0.282249	-0.685536	-0.502827	-0.712983	0.88833	2.05494	-0.324893	1.97352	-1.76024	-1.62579	-1.50793	-1.20755	-1.4776	0.809782	1.25316	-0.0240753	0.518609	0.839737	2.138	-1.93798	0.578581
8.1	6.41146	-0.356563	-1.35164	0.317681	-1.2272	-0.223607	-1.59152	0.825721	0.73717	-0.922078		1.28627	0.0156095	0.137891	-0.327563	-0.562217	4.05083	-2.66956	-1.58752	0.628806	4.4077	0.882244	0.99753	2.02483	2.66012	2.01151	0.694838	0.708858	0.846748	0.764636	-0.193395	-2.20095	1.29212	2.46389	-0.324893	2.89144	0.560955	-2.10633	-3.21796	-1.68109	-0.60414	-0.0759168	-1.53164	0.457432	0.518609	0.449162	1.26535	-0.406445	0.0361614
8.4	5.7342	-0.0594267	0.810983	0.317681	-1.2272	-0.223607	-0.744969	1.09208	1.1152	0.0658627		0.290449	1.26436	-0.242498	-0.947276	0.0624687	3.81735	-0.254882	2.53716	0.628806	0.0645602	-0.121256	0.602469	0.298745	-0.60501	-0.0935588	0.775166	-0.287973	-1.41125	0.435052	-0.193395	0.774982	0.215353	0.725875	-0.324893	1.74404	0.560955	-3.06739	-2.44067	2.10729	0.706043	0.0506112	-0.13924	-0.746335	0.277395	2.79261	0.392695	-2.52703	1.121
8.7	7.54024	1.42625	-1.35164	3.2057	-3.91912	8.72067	-0.744969	1.35844	-1.53104	0.0658627		-1.36926	1.26436	0.423184	2.41688	-0.770446	7.78646	1.48905	0.0431653	0.0820179	0.0645602	0.129619	2.57778	1.89205	0.83549	0.608132	0.373526	-0.62025	-0.987872	0.237301	2.12734	0.278993	0.619139	0.62364	-0.324893	0.596646	0.17409	-0.34438	-3.68433	-0.260451	-0.0218365	0.0506112	-1.53164	0.216678	-2.61717	0.449162	-0.479959	-1.46674	0.397774
9	5.95995	-0.0594267	-0.810982	-0.837525	-2.33564	4.24853	-0.91428	0.559359	0.73717	-0.263451		-1.36926	-1.23314	0.613379	2.32835	-0.14576	4.51778	0.818306	0.52278	0.902201	-0.757116	-0.706631	0.404938	0.165969	0.0672232	-0.0350845	-0.751067	-0.952528	-0.141125	0.171384	-0.812258	0.898979	1.6959	1.03258	-0.324893	1.05561	1.72155	-0.82491	-3.83979	0.213097	-0.895292	-0.328974	-0.13924	1.42045	-0.205032	0.839737	-1.35261	-1.34893	-0.506258
9.3	5.7342	0.237709	-1.35164	2.05049	-0.118761	-0.223607	-0.406347	-1.83789	1.87128	-1.58071		-0.539404	0.639983	2.03984	0.734802	0.0624687	1.94953	1.6232	-0.724217	-1.83174	1.47315	0.213244	1.59012	-0.0995817	-1.08518	0.958977	-0.108443	0.0443035	0	2.08298	0.734901	1.76696	4.11862	5.6332	-0.324893	2.203	0.17409	-1.94615	-4.1507	-0.418301	-1.33202	-0.455502	-0.13924	0.938938	-1.89353	0.839737	-0.479959	-2.99827	-0.867871
9.6	7.54024	2.02053	0.810983	0.895285	-1.86059	-0.223607	-0.91428	0.825721	3.38342	-1.91002		-0.373433	0.639983	0.993769	-0.150502	-0.14576	4.51778	2.83053	0.0431653	-0.46477	0.181943	0.965869	2.18271	-0.365133	-0.0288099	-0.678301	-0.911724	0.930376	0	0.500969	0.425469	1.64296	2.09969	2.77059	-0.324893	2.43248	-0.599642	0.13615	-3.0625	0.528795	-0.895292	1.94854	-1.53164	2.1427	0.0361823	-1.50372	-1.35261	-1.34893	-0.687064
9.9	6.63722	-0.0594267	-1.35164	4.36091	-1.70225	-0.223607	-1.2529	-1.57153	7.54181	-0.922078		-0.207463	-0.920952	-0.337596	-0.593154	0.0624687	4.51778	1.6232	-0.436449	-0.191375	-0.874498	0.380494	-1.96543	-0.0331939	-1.18121	-0.561352	-0.992052	1.70569	-1.129	-0.619619	-0.502827	3.13093	2.36888	2.77059	-0.324893	4.03884	1.33469	0.616681	-4.1507	-0.891848	-0.895292	0.430197	-1.53164	0.457432	0.277395	-1.50372	-1.35261	-2.64484	-1.41029
10.2	7.31449	-0.950836	2.9736	-1.41513	-4.07747	-0.223607	-1.42221	1.35844	1.87128	-1.58071		-0.207463	1.57655	1.56435	-1.56699	-1.60336	4.2843	4.57447	0.714625	-0.191375	0.416707	1.80212	3.17037	-0.564296	-0.31691	0.608132	0.212869	1.59493	-0.423374	0.89647	1.19905	2.75894	1.29212	3.58848	-0.324893	2.203	0.560955	-0.0240267	-3.83979	0.370946	-1.18644	0.0506112	-0.13924	0.216678	0.277395	-0.331989	-1.35261	-2.64484	-1.22948
10.5	7.54024	-0.356563	0.270327	2.05049	-0.910503	-0.223607	-1.2529	1.6248	12.4563	-0.592765		-0.871345	-1.23314	0.898671	0.20362	1.93653	1.94953	3.23298	0.426857	2.81596	-1.34403	0.296869	1.39259	-0.564296	1.12359	0.315761	1.49812	1.92721	1.129	0.830553	0.270753	1.27097	2.09969	3.99743	-0.324893	2.43248	-1.37337	-0.985087	-4.1507	0.213097	0.269316	-0.582031	1.25316	0.216678	-0.446245	2.01146	-1.35261	-1.58455	-0.687064
10.8	8.44327	-0.356563	0.270327	3.7833	0.0395869	-0.223607	-0.91428	1.6248	6.78574	-0.592765		-2.36508	-2.1697	0.423184	-1.47846	-0.353989	3.81735	3.23298	1.38609	1.17559	0.534089	1.80212	1.59012	0.630683	1.69979	0.958977	0.534182	1.04113	-0.705623	0.105467	1.19905	1.27097	2.63807	3.79295	-0.324893	1.51456	1.33469	-0.664734	-3.83979	0.0552471	1.14277	0.303668	-0.13924	1.17969	-0.446245	1.62089	-1.35261	-0.995496	-0.506258
11.1	5.95995	-0.6537	0.270327	-0.259921	0.989678	-0.223607	-0.91428	1.6248	7.91984	-1.58071		-0.0414927	0.327797	0.232989	0.646272	-0.978675	4.2843	4.03787	1.67385	-0.191375	5.112	1.30037	1.98518	3.35258	4.38872	2.83015	0.935822	2.92404	2.25799	2.41256	0.889616	1.27097	2.63807	6.04215	-0.324893	0.826126	1.33469	0.296327	-3.37342	2.73869	0.997195	0.430197	-0.13924	-2.43161	-0.687459	0.0585858	-1.35261	-1.11331	0.216968
11.4	3.92815	-0.6537	1.35164	0.895285	-0.435458	-0.223607	-0.91428	1.09208	0.73717	-1.25139		1.45224	-1.23314	2.61043	0.911863	-0.770446	6.61908	1.3549	-1.29975	2.81596	0.416707	-0.204881	2.57778	1.0954	0.643423	0.315761	0.775166	-1.06329	0.141125	0.89647	0.425469	2.75894	2.90726	2.87283	-0.324893	2.43248	-0.212776	-0.0240267	-2.28522	1.94944	-1.4776	-0.328974	-0.13924	-1.70935	-0.446245	0.0585858	1.26535	-2.40922	-1.41029
11.7	7.08873	-1.24797	1.35164	2.6281	-0.435458	-0.223607	-1.76084	-0.239725	9.81002	-0.592765		-0.539404	-2.1697	1.75455	0.380681	-0.562217	4.98474	1.48905	-0.436449	-1.01156	-0.757116	-0.372131	-0.780246	-1.16179	0.739457	-0.0350845	-0.911724	2.37024	0.423374	1.09422	1.6632	0.898979	2.23429	3.48625	-0.324893	1.74404	0.560955	-0.504557	-2.44067	0.370946	-0.895292	0.683253	-0.13924	0.698184	-0.446245	1.62089	-1.35261	-1.23112	-0.687064
12	5.50844	0.534845	3.51426	2.6281	-1.86059	-0.223607	-0.575658	4.28842	2.62735	0.0658627		-1.36926	-2.48189	-0.622888	1.44305	0.687155	3.3504	0.952455	-1.97121	1.17559	-0.874498	-0.706631	-2.16296	0.497908	0.54739	0.432709	-0.269099	0.0443035	-1.41125	0.435052	-0.0386789	1.76696	-0.457625	1.54376	-0.324893	4.26832	-0.599642	0.296327	-1.81885	1.47589	0.706043	0.303668	-1.53164	-0.987089	0.0361823	2.01146	-1.35261	-2.1736	0.216968
12.3	5.50844	-0.356563	0.810983	2.05049	-2.81069	-0.223607	-1.2529	4.82114	2.62735	1.0538		-0.705375	0.952171	-0.432694	0.026559	0.687155	4.51778	-0.389031	-0.724217	-1.01156	0.416707	-0.204881	2.18271	1.95844	-0.124843	-0.268981	0.61451	1.70569	0.282249	1.68747	1.19905	0.650985	2.63807	1.03258	-0.324893	3.57988	1.33469	-1.30544	-3.99525	0.370946	1.5795	-0.0759168	-0.13924	-0.264829	-0.928672	1.23031	-0.479959	-1.70236	-0.144645
12.6	6.86298	-0.6537	0.270327	-0.259921	-2.01894	-0.223607	-1.76084	-1.03881	6.78574	-1.58071		0.456419	-0.296578	0.328086	1.00039	-0.770446	4.2843	2.96468	0.330934	2.26917	-0.404969	0.965869	0.00987662	1.36095	1.12359	0.374235	0.775166	1.04113	1.41125	2.08298	-0.193395	3.62691	0.484543	1.74824	-0.324893	2.43248	0.947821	-1.30544	-4.30616	0.686644	-1.62317	0.809782	-0.13924	0.698184	-0.205032	-0.722564	-1.35261	-0.995496	0.397774
12.9	7.31449	-0.950836	0.270327	3.2057	-0.910503	-0.223607	-1.59152	-0.506087	2.24931	-0.263451		2.11612	0.0156095	1.84965	0.469211	1.52007	1.01563	2.69639	-0.340526	-0.191375	2.06006	1.04949	-0.187654	1.49372	2.17996	1.54372	1.33746	0.376581	2.39912	1.55564	1.6632	0.0309991	3.84943	3.58848	-0.324893	2.203	0.17409	-2.2665	-4.1507	-0.891848	0.706043	0.809782	-0.13924	-0.746335	1.24225	2.40204	0.392695	-1.46674	0.0361614
13.2	5.28269	0.237709	0.810983	2.05049	-1.06885	-0.223607	-1.42221	1.6248	2.62735	-0.263451		0.622389	0.327797	0.613379	-0.327563	-2.43628	3.11692	1.89149	0.52278	0.628806	0.768854	-0.539381	-0.385185	-1.49372	-0.508977	0.198812	-1.47402	1.15189	-0.987872	0.89647	-0.348111	1.51896	0.215353	1.03258	-0.324893	3.3504	-1.37337	-1.14526	-2.12976	0.528795	-0.895292	0.17714	-0.13924	-0.987089	-0.928672	0.0585858	-0.479959	-1.23112	2.02503
13.5	4.15391	0.831982	-0.810982	1.47289	-0.27711	-0.223607	-0.406347	1.35844	0.73717	0.395177		-0.539404	1.26436	1.94474	-0.416093	0.478926	3.81735	2.56224	0.810548	1.17559	1.121	1.21674	1.39259	-0.829847	0.54739	0.900503	-0.0281147	2.37024	1.55237	2.67623	0.580185	2.75894	5.32998	3.38401	-0.324893	2.43248	-0.599642	-0.664734	-3.0625	0.213097	-0.60414	0.0506112	-1.53164	1.42045	-0.205032	1.23031	1.26535	-1.23112	-0.506258
13.8	4.60542	-0.6537	-0.810982	0.317681	-2.33564	-0.223607	-0.91428	0.825721	1.87128	-0.592765		1.95015	1.88873	0.613379	-1.3014	-0.14576	3.3504	-1.59637	0.139088	-0.46477	-1.22665	-1.04113	0.00987662	-0.630683	-0.31691	0.140338	-0.108443	0.930376	-0.564498	-0.0263667	-1.12169	0.154996	0.484543	-0.9099	-0.324893	1.74404	-0.599642	-1.14526	-3.52887	-1.68109	0.414891	-0.328974	1.25316	1.17969	0.518609	0.0585858	-0.479959	-2.52703	-0.867871
14.1	6.18571	-0.356563	-0.270328	1.47289	-0.910503	-0.223607	-1.42221	-0.239725	0.73717	0.724491		-0.539404	-0.296578	1.27906	-2.1867	1.93653	1.2491	2.02564	-1.01199	0.0820179	1.70791	-0.288506	1.59012	1.82566	0.739457	1.07593	0.935822	1.37341	0.282249	-0.158201	1.19905	0.154996	1.56131	1.95271	-0.324893	3.57988	0.560955	-0.0240267	-2.59613	-1.68109	1.72507	0.430197	-0.13924	-0.505582	0.759823	-1.11314	-0.479959	-0.877686	-0.144645
14.4	5.7342	1.42625	-1.89229	3.7833	-0.593807	-0.223607	-1.2529	-1.03881	1.49324	2.04175		-1.7012	-1.23314	1.18396	-0.504623	-0.978675	1.94953	-0.657328	-0.244603	2.26917	1.94268	1.21674	-0.385185	-0.0995817	0.25929	1.48525	-0.188771	-0.73101	-0.987872	0.500969	1.97263	0.650985	0.215353	2.46389	-0.324893	1.51456	0.17409	-0.34438	-3.0625	-0.891848	1.28835	-0.328974	-1.53164	1.17969	0.518609	0.449162	0.392695	-1.58455	0.0361614
14.7	3.47664	-1.54511	-0.810982	-1.41513	1.14803	-0.223607	-1.08359	1.35844	0.359134	1.38312		1.1203	0.327797	3.27611	-0.504623	-1.60336	1.94953	-1.32807	-0.82014	2.54256	1.121	0.547744	-1.57037	2.88787	1.41169	1.95304	-0.269099	0.265822	-0.705623	-1.27879	1.19905	-0.712983	1.02293	1.74824	-0.324893	2.89144	-0.986508	-1.46562	-2.44067	0.213097	1.14277	-1.3412	-0.13924	2.1427	-1.16989	-1.11314	0.392695	-0.877686	0.0361614
15	6.41146	-0.356563	-1.35164	3.7833	-0.118761	-0.223607	-1.42221	0.559359	1.87128	1.71243		-0.871345	-0.296578	1.56435	-0.504623	-0.353989	-0.385238	0.147563	-1.29975	-0.46477	0.0645602	0.965869	0.602469	-0.298745	0.54739	0.549658	1.25713	-1.94936	0	-0.0263667	0.734901	-0.83698	3.04186	3.0773	-0.324893	2.43248	-0.212776	-0.0240267	-3.83979	-1.52325	0.851619	-1.72079	-0.13924	-0.0240753	0.518609	0.839737	-0.479959	-1.11331	0.578581
15.3	7.766	-1.24797	1.89229	1.47289	0.197935	-0.223607	-1.59152	2.15753	3.76145	0.724491		-0.373433	-0.920952	0.613379	-0.327563	-1.60336	1.71606	-0.389031	-0.532372	0.0820179	-0.287586	-0.455756	0.799999	-0.365133	-0.701044	-0.152033	-0.349427	-0.73101	0.987872	-0.290034	0.270753	-1.45697	-0.0538384	0.62364	-0.324893	2.203	0.560955	-0.0240267	-3.52887	-0.733999	1.72507	0.17714	-1.53164	2.38346	-1.16989	2.01146	-1.35261	0.182606	0.216968
15.6	5.95995	0.831982	0.270327	1.47289	-1.70225	-0.223607	-1.08359	2.15753	3.00538	-0.263451		-0.871345	-1.85751	0.898671	-0.416093	-0.978675	0.315194	2.15979	0.618702	0.0820179	0.886236	0.380494	0.99753	-0.896234	-0.124843	1.42677	-1.55435	-0.62025	-1.129	-0.0263667	1.81791	0.898979	1.56131	1.95271	-0.324893	3.3504	-0.212776	0.456504	-2.59613	-0.260451	0.560467	-0.835087	-0.13924	0.457432	-0.205032	0.449162	-0.479959	0.182606	0.759387
15.9	6.18571	-0.356563	-0.810982	2.05049	0.672981	-0.223607	-1.42221	1.09208	6.78574	-1.58071		-1.36926	-0.608766	-0.432694	0.11509	-0.978675	-1.08567	-1.05977	-1.29975	-1.28495	1.00362	-1.29201	-0.582715	0.564296	0.451357	0.491183	0.212869	-1.8386	0.282249	-0.883287	1.04433	-2.44894	1.29212	1.646	-0.324893	2.66196	-0.986508	0.456504	-2.75159	1.31804	0.12374	1.18937	2.64556	0.457432	0.0361823	0.449162	2.138	-0.288635	-0.144645
16.2	3.25088	-0.950836	-1.35164	1.47289	0.197935	-0.223607	-1.42221	0.825721	2.24931	0.395177		-0.705375	1.26436	0.137891	-1.3014	0.478926	-1.7861	-0.254882	0.714625	-0.46477	-1.46141	-0.0376313	1.19506	-0.165969	1.12359	0.608132	1.01615	1.48417	-0.705623	0.435052	1.35376	-1.58096	0.484543	1.13482	-0.324893	1.97352	1.33469	-0.34438	-2.12976	0.686644	-0.0218365	-0.328974	4.03796	2.38346	0.277395	0.449162	-0.479959	-0.642066	-0.325452
16.5	5.50844	-1.54511	0.270327	-0.259921	1.30637	-0.223607	-1.59152	0.825721	1.49324	-1.25139		-1.03732	0.639983	1.56435	2.06276	-0.353989	-2.25305	-0.657328	-1.01199	-1.28495	-0.757116	-1.04113	0.00987662	-0.365133	-0.508977	0.140338	-0.670739	-0.0664553	-0.564498	-1.74021	0.734901	0.154996	-1.39979	0.316931	-0.324893	4.26832	-0.986508	-0.504557	-0.264277	0.0552471	0.414891	0.303668	-1.53164	0.938938	-1.16989	0.0585858	0.392695	-1.58455	1.48261
16.8	3.02513	-0.950836	1.35164	0.895285	-1.5439	8.72067	-1.42221	0.825721	3.76145	0.0658627		2.28209	0.0156095	-0.242498	0.469211	-0.562217	-2.01958	1.3549	-0.340526	-0.738164	-1.93094	-1.79376	-2.75555	-0.564296	-0.0288099	-0.502878	-0.510083	-1.50632	-1.41125	-1.60837	-3.59714	-2.57294	-1.2652	-1.72779	-0.324893	3.3504	0.17409	-1.14526	-2.44067	0.213097	0.414891	0.0506112	-0.13924	1.90195	-0.687459	0.449162	1.26535	-1.34893	2.20584
17.1	3.02513	-0.356563	-0.810982	2.6281	-2.65234	-0.223607	-1.76084	0.292998	1.49324	-0.263451		1.61821	0.327797	0.993769	1.44305	-0.14576	-1.31915	-2.26711	-1.29975	-0.46477	-0.287586	-0.288506	0.00987662	-0.697071	-1.56534	-0.327456	-0.0281147	-1.8386	-1.129	-1.74021	-1.58584	-1.20897	-1.80358	0.11246	-0.324893	2.66196	-1.37337	0.13615	-2.59613	-0.260451	4.05429	-0.582031	-0.13924	0.216678	-1.16989	0.0585858	-1.35261	-2.1736	-0.325452
17.4	6.41146	1.12912	-0.270328	0.317681	-3.12738	-0.223607	-1.08359	0.559359	2.24931	-0.263451		2.11612	3.13748	0.423184	-0.0619715	0.0624687	-2.25305	-1.05977	-0.244603	0.0820179	-0.639734	-0.0376313	-0.582715	-1.69289	-0.412944	0.081864	-1.15271	-1.50632	-0.705623	-1.60837	-1.27641	-1.08497	0.619139	0.316931	-0.324893	2.43248	-1.37337	-2.74703	-3.83979	0.686644	-0.458564	-0.455502	-1.53164	-0.987089	0.0361823	0.0585858	0.392695	-1.23112	0.0361614
17.7	5.05693	-0.950836	0.270327	-0.837525	-2.49399	-0.223607	-0.91428	-1.83789	-0.396938	-0.922078		0.290449	4.38623	0.328086	-1.12434	2.35298	-2.25305	-3.3403	-0.916063	-1.55835	0.0645602	-0.790256	-1.17531	-0.298745	-1.37328	-0.619827	-0.510083	-1.72784	-1.27012	-3.2563	-0.812258	-3.56492	-0.861411	-0.296484	-0.324893	4.95675	-0.599642	0.776857	-1.66339	-0.57615	3.03526	0.683253	-0.13924	-1.4686	0.277395	3.18319	-1.35261	-1.82017	1.48261
18	7.31449	-1.54511	0.270327	2.05049	-1.5439	-0.223607	-1.59152	1.09208	-1.15301	0.0658627		0.456419	-0.296578	-0.527791	1.97423	3.39413	-2.48653	-0.791476	-2.93044	0.628806	0.534089	-0.455756	0.00987662	-0.962622	1.41169	0.0233897	-0.590411	-0.73101	-0.282249	-0.685536	0.889616	0.154996	-0.188433	0.725875	-0.324893	1.05561	-0.986508	-0.82491	-2.28522	-0.57615	1.28835	1.06284	-1.53164	-1.4686	0.518609	1.23031	-1.35261	-1.11331	-0.687064
18.3	5.50844	-1.84224	1.89229	1.47289	-1.38555	-0.223607	-0.91428	-1.30517	-0.396938	0.724491		0.124478	2.51311	-0.147401	-0.593154	3.39413	-2.25305	-3.3403	-2.35491	-0.191375	0.181943	-1.20838	-1.17531	-0.497908	-0.124843	0.491183	0.293198	-1.06329	-1.129	-0.685536	-1.27641	-2.94493	-0.0538384	0.828111	-0.324893	3.12092	-0.212776	-1.78597	-3.99525	0.370946	-0.312988	0.93631	-0.13924	-0.0240753	0.277395	2.01146	-1.35261	-0.524255	0.0361614
18.6	6.18571	-0.6537	-1.89229	2.05049	-0.27711	-0.223607	-1.59152	-0.506087	2.24931	1.0538		1.1203	0.327797	-0.242498	0.292151	1.10361	-2.01958	-2.13296	-1.68345	-1.01156	0.416707	-0.0376313	-1.96543	-0.365133	1.31566	0.198812	0.534182	-1.17405	0.846748	-0.553702	-3.28771	-2.57294	-0.323029	0.11246	-0.324893	2.89144	-0.986508	-1.62579	-3.0625	-0.102602	-0.895292	-0.708559	-1.53164	-0.505582	2.20711	-0.722564	0.392695	0.771657	1.30181
18.9	6.86298	-0.6537	-0.270328	1.47289	-1.86059	-0.223607	-1.42221	0.292998	0.359134	-0.592765		0.954331	-0.608766	-0.432694	-0.0619715	0.478926	-2.72001	-1.19392	-1.20383	-0.46477	2.64697	1.55124	-1.96543	0.962622	1.12359	1.42677	0.694838	0.819617	-0.423374	-0.553702	0.270753	-1.82896	2.90726	1.33929	-0.324893	1.74404	-1.37337	0.456504	-2.44067	0.0552471	0.997195	-0.455502	2.64556	-0.0240753	1.24225	-1.11314	-1.35261	0.182606	-1.22948
19.2	5.05693	-0.950836	0.270327	0.317681	-0.910503	-0.223607	-0.575658	0.292998	-0.396938	-0.592765		-0.705375	2.51311	-1.00328	-0.504623	0.478926	-2.72001	-3.20615	-1.97121	0.355412	2.52959	0.714993	-1.96543	1.0954	-0.508977	1.89456	-0.269099	-0.73101	-2.54024	-2.33346	-1.89527	-2.69694	0.0807572	1.85047	-0.324893	1.51456	-0.212776	0.13615	-1.35248	-0.260451	-0.0218365	1.3159	2.64556	-0.746335	1.72468	-0.331989	-1.35261	0.0647957	0.578581
19.5	6.86298	0.831982	-0.810982	0.895285	-3.12738	-0.223607	-0.575658	-0.772449	3.38342	-0.263451		0.290449	-0.296578	-1.00328	-0.858745	-0.353989	-2.25305	1.0866	-1.58752	-0.738164	3.23388	1.46762	0.00987662	0.962622	-0.89311	1.83609	1.41779	-1.39556	1.129	-1.27879	0.889616	-1.70496	1.29212	2.25941	-0.324893	-0.0917913	-0.212776	2.21845	-0.575191	-0.102602	0.851619	-0.582031	-0.13924	-0.987089	-0.446245	0.449162	-0.479959	0.418226	0.397774
19.8	3.47664	-1.24797	-1.35164	0.895285	-2.96903	-0.223607	-1.08359	-1.03881	0.359134	0.724491		0.456419	0.0156095	-1.76406	-1.3014	1.93653	-2.72001	1.3549	-0.436449	-0.46477	1.121	0.464119	1.98518	1.0954	1.41169	2.12846	2.70304	0.930376	0.705623	0.632802	0.580185	1.89096	2.77267	2.56612	-0.324893	1.74404	-0.599642	-0.504557	-0.419734	0.213097	0.414891	0.0506112	-0.13924	0.457432	0.0361823	0.839737	2.138	-0.524255	-1.04868
20.1	3.70239	0.534845	-0.270328	-1.99273	-3.60243	-0.223607	-1.76084	-0.239725	1.1152	0.0658627		-0.705375	0.327797	-1.85916	1.44305	1.52007	-2.25305	3.23298	0.330934	0.355412	2.76435	2.13662	-0.385185	1.56011	0.163257	1.66067	1.33746	1.81645	0.141125	1.42381	1.81791	3.62691	4.52241	3.17954	-0.324893	1.74404	-0.212776	-1.62579	-1.04156	-0.102602	1.87065	0.430197	-1.53164	-0.505582	0.277395	2.01146	1.26535	-0.0530146	1.121
20.4	3.02513	-0.0594267	2.43295	-0.837525	-1.70225	-0.223607	-1.42221	0.292998	2.62735	-1.25139		0.290449	-1.54533	-2.90523	-1.21287	0.0624687	-2.72001	0.550009	1.09832	-0.191375	1.121	0.129619	-1.17531	-0.697071	-0.220877	1.01745	0.694838	0.376581	1.27012	0.632802	0.580185	1.14697	2.09969	1.74824	-0.324893	3.12092	-0.212776	0.456504	-2.59613	1.16019	0.997195	3.21382	-1.53164	1.6612	-1.16989	2.01146	-1.35261	0.889467	0.397774
20.7	4.60542	-0.356563	1.35164	-0.259921	0.0395869	-0.223607	-0.575658	0.559359	3.00538	-0.592765		-0.0414927	-1.85751	-2.04935	0.734802	0.895384	-3.18696	-0.254882	1.19424	1.44899	0.651472	-0.288506	-0.582715	-0.630683	0.0672232	0.374235	-0.108443	0.819617	1.97574	0.632802	2.28206	0.278993	0.619139	0.930347	-0.324893	1.74404	0.560955	0.776857	-1.35248	1.47589	0.706043	1.3159	-0.13924	-0.264829	0.277395	-0.331989	3.01065	-0.524255	1.121
21	1.67059	0.831982	-0.270328	0.317681	-3.28573	-0.223607	0.60952	1.09208	-0.396938	0.0658627		-1.20329	-0.296578	-2.42974	1.62011	-0.14576	-2.25305	-1.05977	-1.10791	1.44899	-0.522351	-0.121256	-1.7679	-0.564296	1.79582	-0.152033	-0.670739	0.155063	-0.705623	0.632802	-0.0386789	-1.82896	0.753735	0.0102236	-0.324893	4.72727	0.560955	0.456504	-0.575191	1.16019	0.560467	-0.455502	2.64556	0.216678	-1.16989	0.839737	1.26535	-1.11331	-0.325452
21.3	0.541814	0.237709	-0.810982	-1.99273	-3.60243	-0.223607	-1.42221	0.292998	-0.018902	-0.922078		0.622389	0.952171	-1.85916	1.26599	0.270698	-2.25305	-2.13296	-0.82014	0.355412	0.768854	1.13312	0.207407	-0.232357	0.25929	1.19287	-0.269099	-1.8386	-1.97574	-0.421868	-0.657542	-3.06893	-0.861411	-0.194249	-0.324893	0.826126	-0.212776	0.937034	-1.19702	0.528795	0.12374	0.556725	2.64556	0.216678	1.00104	-1.50372	-0.479959	-1.70236	-0.687064
21.6	2.79937	0.831982	1.35164	-2.57034	-2.17729	-0.223607	-1.42221	0.559359	0.359134	-0.922078		0.124478	-0.296578	-1.66896	1.08892	1.93653	-2.48653	-2.26711	-1.87529	-0.738164	-0.639734	0.0459937	-2.75555	-0.497908	1.02756	-0.444404	0.293198	-1.06329	-1.69349	-0.883287	-1.27641	-2.69694	-0.59222	0.316931	-0.324893	2.66196	-1.37337	-1.30544	-2.12976	1.00234	3.03526	-0.202445	1.25316	0.698184	-0.687459	0.449162	-1.35261	-2.64484	1.66342
21.9	3.02513	-1.84224	-1.35164	2.05049	-1.06885	-0.223607	-0.406347	0.0266363	-0.018902	-1.25139		-0.207463	-2.1697	-2.14445	1.26599	2.14476	-3.42044	0.818306	-0.244603	1.44899	1.82529	1.30037	-0.977777	0.165969	1.41169	0.783555	-0.0281147	1.59493	1.83462	-0.81737	-0.0386789	-3.19293	0.88833	1.74824	-0.324893	2.203	-0.986508	-1.30544	-2.75159	-0.102602	3.03526	-1.08814	1.25316	2.1427	0.277395	0.839737	-0.479959	-2.29141	0.0361614
22.2	3.02513	-1.24797	0.810983	-0.259921	-0.27711	-0.223607	-1.42221	2.15753	1.87128	-0.922078		-1.03732	-0.920952	-2.04935	-0.0619715	1.52007	-3.18696	0.415861	0.906471	-0.46477	1.82529	1.21674	-1.17531	0.43152	0.54739	0.081864	-0.349427	0.598099	1.27012	0.830553	1.04433	1.76696	2.23429	1.03258	-0.324893	1.05561	0.947821	-0.82491	-3.0625	1.16019	0.706043	0.556725	-1.53164	-0.0240753	-0.205032	0.449162	-0.479959	-1.93798	-1.41029
22.5	2.34786	-0.0594267	-0.270328	0.317681	-0.593807	-0.223607	-1.59152	1.35844	2.24931	0.395177		-1.03732	0.639983	-1.95425	-0.416093	-0.14576	-3.65392	2.15979	0.330934	1.17559	0.534089	0.129619	2.38024	1.02901	0.643423	0.783555	1.17681	0.930376	0.564498	1.16014	2.59149	2.38694	0.88833	2.66836	-0.324893	0.367167	-0.212776	1.41756	-2.90705	0.370946	-0.0218365	-0.328974	-1.53164	0.698184	0.518609	-0.331989	0.392695	-3.3517	0.216968
22.8	1.89635	-1.84224	0.270327	0.317681	0.0395869	-0.223607	-1.59152	0.825721	2.24931	0.724491		0.78836	-1.23314	-2.71503	-1.21287	1.10361	-3.42044	-1.86466	-1.97121	0.355412	0.416707	0.129619	0.00987662	0.829846	-0.220877	-0.327456	-0.269099	-1.06329	1.55237	-0.619619	-0.502827	-2.32495	1.29212	0.11246	-0.324893	-0.78023	2.10842	0.296327	-2.12976	-0.57615	-0.895292	0.809782	-0.13924	-0.264829	-1.16989	0.839737	-1.35261	-1.11331	0.0361614
23.1	4.60542	-0.0594267	1.89229	-0.259921	0.0395869	-0.223607	-1.59152	1.09208	1.49324	0.724491		-0.0414927	0.327797	-2.52484	1.97423	1.10361	-3.18696	-0.254882	-0.532372	0.355412	2.17744	-0.455756	-1.17531	0.564296	0.163257	1.3683	0.373526	-0.177214	0.846748	0.764636	0.425469	0.278993	0.753735	1.54376	-0.324893	0.367167	-0.599642	0.296327	-2.28522	-0.418301	-1.04087	0.809782	1.25316	0.216678	-0.928672	-0.722564	-0.479959	-3.3517	0.0361614
23.4	4.60542	0.237709	1.35164	-1.41513	-0.752155	-0.223607	-1.59152	0.292998	3.00538	-0.922078		-1.03732	-1.23314	-0.908181	1.26599	0.895384	-2.25305	0.550009	-1.39568	-0.46477	-0.874498	0.464119	-1.17531	-0.298745	1.21962	0.315761	-0.0281147	0.265822	-0.846748	-1.54246	-1.12169	-0.340992	0.215353	-0.0920125	-0.324893	0.596646	0.17409	0.13615	-2.59613	0.0552471	1.5795	0.683253	1.25316	1.6612	-0.687459	-0.331989	0.392695	0.182606	-0.144645
23.7	2.57362	-0.356563	4.05491	-0.259921	-1.38555	-0.223607	-1.42221	1.35844	3.76145	0.724491		0.456419	-0.920952	-1.95425	0.380681	2.35298	-2.95349	0.550009	-0.628295	0.0820179	-0.99188	0.631368	0.602469	-1.16179	1.41169	0.491183	0.694838	0.48734	-0.282249	-0.685536	1.97263	-0.0929977	0.753735	0.62364	-0.324893	-0.0917913	1.33469	-0.82491	-1.50793	-0.418301	-0.312988	1.82201	1.25316	-0.505582	-1.4111	0.839737	1.26535	-0.524255	-1.04868
24	3.02513	-0.6537	2.9736	-1.41513	-1.86059	-0.223607	-1.2529	-1.83789	4.51752	2.70037		0.290449	1.26436	-1.19347	0.557742	0.270698	-1.7861	-2.40126	-1.68345	-0.738164	0.768854	-0.623006	-0.977777	1.0954	-0.412944	0.374235	-0.269099	-0.952528	-0.705623	0.0395501	-0.502827	-0.588986	-1.1306	-0.39872	-0.324893	-0.0917913	1.33469	-0.504557	-1.66339	-0.102602	-0.458564	0.0506112	-1.53164	-0.264829	-0.446245	0.449162	0.392695	0.418226	0.759387
24.3	3.70239	-1.24797	-1.35164	-0.259921	-2.65234	-0.223607	-1.42221	1.09208	-0.396938	0.724491		1.1203	0.639983	-0.622888	-0.0619715	1.31184	-1.55262	-2.26711	-0.0527576	-1.28495	-1.10926	0.129619	0.207407	-1.22817	-0.31691	-1.73084	-1.715	-0.73101	-0.987872	-0.619619	-1.12169	-2.44894	-0.323029	-0.0920125	-0.324893	1.74404	0.17409	-0.985087	-0.730648	-0.57615	0.560467	0.683253	-1.53164	-0.264829	1.24225	2.40204	-0.479959	0.300416	0.578581
24.6	4.83117	-0.950836	-1.35164	0.895285	-1.2272	-0.223607	-0.575658	0.0266363	-1.15301	2.37106		0.456419	0.327797	-0.622888	0.380681	2.14476	-0.852191	-2.13296	0.139088	-1.01156	0.886236	-0.539381	-0.977777	-0.630683	-0.508977	-1.26304	-1.55435	-1.8386	-1.41125	-0.0263667	-0.657542	-0.83698	-0.323029	0.316931	-0.324893	0.137687	0.17409	-0.34438	-2.59613	-1.83894	0.269316	1.44242	-0.13924	-0.264829	-0.928672	0.449162	0.392695	-0.995496	0.397774
24.9	2.34786	-1.54511	0.270327	-1.41513	-2.01894	-0.223607	-1.2529	-0.239725	-0.018902	0.395177		-0.705375	0.327797	-0.908181	3.47925	2.35298	-1.31915	3.63543	0.618702	0.355412	-0.639734	-0.957506	-0.187654	1.02901	0.163257	-0.0350845	-0.188771	0.930376	0.564498	0.698719	1.97263	1.64296	1.6959	1.95271	-0.324893	2.43248	-0.212776	0.296327	-1.50793	-0.418301	-0.0218365	0.93631	-0.13924	0.216678	0.759823	2.40204	-1.35261	-2.1736	1.121
25.2	3.70239	0.534845	1.35164	1.47289	-2.49399	-0.223607	-1.42221	0.292998	-0.774972	2.04175		-0.207463	-2.1697	-0.622888	1.08892	2.97767	-0.852191	0.550009	1.19424	-0.191375	-1.10926	-0.0376313	2.77531	-0.0995817	-0.0288099	0.140338	0.132541	-0.398733	-1.41125	0.698719	0.889616	0.898979	1.02293	1.74824	-0.324893	1.05561	2.10842	-0.0240267	-2.90705	0.370946	0.12374	1.69548	-0.13924	-1.4686	1.24225	0.449162	-0.479959	-0.877686	-0.506258
25.5	3.70239	-1.54511	0.270327	-0.259921	-3.76078	-0.223607	-0.575658	0.559359	-0.396938	-1.58071		-1.7012	-1.23314	-1.38367	0.911863	1.7283	-2.01958	3.09883	0.235011	0.628806	-1.57879	0.380494	1.19506	-0.165969	-1.85344	0.081864	-0.429755	1.37341	0.423374	2.14889	1.50848	2.88293	0.619139	1.23706	-0.324893	2.89144	-0.986508	-2.2665	-1.50793	1.16019	0.851619	0.303668	-1.53164	-1.22784	-0.446245	0.0585858	1.26535	0.771657	-1.04868
25.8	3.70239	-0.356563	0.270327	-0.259921	-2.49399	-0.223607	0.270898	-1.57153	2.24931	-0.263451		0.456419	-1.85751	-0.0523037	0.292151	1.10361	-1.7861	4.97691	0.810548	0.355412	-1.46141	-0.957506	2.97284	1.0954	0.739457	0.140338	0.212869	0.930376	0.282249	2.47848	2.28206	1.76696	0.619139	1.33929	-0.324893	1.05561	-0.599642	-0.34438	-0.730648	0.844494	-0.895292	0.430197	-1.53164	2.38346	-1.89353	-1.11314	-0.479959	-1.34893	-1.04868
26.1	4.37966	-0.356563	-1.89229	-1.99273	-0.593807	-0.223607	-0.91428	-2.90334	-1.15301	-1.58071		-0.705375	-0.608766	-0.813083	1.8857	1.10361	-1.7861	3.09883	2.24939	-0.738164	-0.757116	-0.121256	1.39259	-0.165969	1.21962	0.491183	0.935822	0.48734	1.27012	2.9399	2.43678	2.13895	1.02293	0.828111	-0.324893	1.05561	0.17409	-0.0240267	0.0466373	0.0552471	0.269316	-0.835087	-0.13924	-0.0240753	-0.687459	0.0585858	1.26535	0.300416	0.759387
26.4	2.1221	0.534845	0.270327	1.47289	-0.27711	-0.223607	-0.744969	0.0266363	4.13949	-0.263451		-0.373433	3.76186	0.232989	3.21365	1.7283	-1.31915	3.23298	0.714625	0.0820179	1.82529	1.96937	-0.187654	-0.763459	-0.60501	1.3683	0.293198	0.265822	1.55237	1.22605	1.81791	5.11488	2.77267	2.25941	-0.324893	0.826126	-0.212776	1.8981	-0.575191	0.844494	0.997195	-0.835087	-1.53164	-0.987089	1.48346	1.62089	-0.479959	-0.759876	-0.506258
26.7	3.92815	-1.54511	-0.270328	1.47289	0.672981	-0.223607	-1.59152	-0.772449	4.89556	1.0538		1.78418	1.26436	1.65945	0.734802	1.52007	-0.385238	-0.120734	0.139088	0.355412	1.00362	0.296869	0.799999	1.0954	0.163257	0.549658	0.132541	0.376581	-0.564498	-0.158201	0.889616	3.13093	0.88833	1.23706	-0.324893	2.203	1.33469	-0.0240267	-0.730648	-0.891848	-0.458564	-0.0759168	1.25316	-0.987089	1.72468	-1.11314	-1.35261	-0.642066	1.84423
27	3.02513	-0.950836	4.05491	3.2057	-1.86059	-0.223607	-1.08359	-1.83789	10.9441	0.724491		-2.03314	-0.608766	1.27906	0.734802	0.895384	-0.852191	-1.32807	-0.628295	-0.738164	0.768854	0.296869	0.00987662	1.36095	0.931523	0.432709	-0.590411	-0.62025	1.41125	-1.08104	-0.0386789	0.526988	0.753735	2.05494	-0.324893	0.367167	-0.599642	1.09721	-1.50793	-0.418301	-0.458564	0.303668	-1.53164	-0.746335	-0.928672	-0.331989	1.26535	-2.1736	1.121
27.3	5.50844	1.12912	3.51426	1.47289	-4.07747	8.72067	0.270898	3.22297	7.54181	0.395177		0.456419	1.88873	0.708476	0.823333	1.7283	-1.7861	-0.254882	-1.29975	0.0820179	-1.93094	-0.873881	-1.7679	0.165969	-0.124843	1.25135	0.694838	1.26265	-0.141125	1.48972	-0.0386789	-0.712983	0.619139	0.725875	-0.324893	1.97352	1.72155	0.776857	0.357551	-0.57615	-1.4776	-0.961616	-1.53164	-0.746335	-0.205032	-0.722564	-0.479959	-2.29141	-1.22948
27.6	4.37966	-2.43652	0.810983	2.05049	-0.593807	-0.223607	1.11745	0.0266363	3.00538	2.04175		-0.373433	0.0156095	-0.622888	-0.416093	-0.14576	-1.55262	-1.32807	0.235011	1.99578	1.82529	0.129619	-0.187654	1.0954	1.79582	0.900503	0.534182	-0.287973	1.129	0.171384	-0.812258	0.650985	0.619139	1.33929	-0.324893	0.367167	-0.212776	0.937034	0.513008	-0.418301	0.414891	0.430197	-1.53164	0.938938	0.277395	0.839737	-0.479959	-1.23112	-0.144645
27.9	5.7342	-0.0594267	1.89229	4.93851	-2.33564	-0.223607	0.440209	-1.03881	2.24931	0.724491		0.290449	-0.608766	0.708476	2.23982	1.93653	-2.01958	-0.925625	-0.0527576	-1.01156	-0.522351	-0.204881	-0.582715	-1.0954	-0.220877	0.783555	-0.0281147	0.265822	0.705623	0.0395501	0.116037	-1.45697	-0.323029	1.85047	-0.324893	1.05561	0.560955	0.937034	-0.575191	-0.733999	1.87065	-0.708559	1.25316	-0.987089	0.0361823	-0.331989	-0.479959	-1.23112	0.397774
28.2	5.28269	-1.24797	-0.270328	3.2057	-1.2272	-0.223607	-0.744969	-0.239725	4.51752	2.70037		0.290449	-1.54533	-1.28857	0.469211	0.478926	-0.852191	0.818306	-0.340526	1.44899	0.181943	-0.204881	1.19506	-0.43152	0.83549	0.432709	-0.0281147	1.04113	-0.282249	-0.158201	1.35376	-2.69694	1.29212	0.725875	-0.324893	-0.321271	0.560955	0.296327	-0.886105	0.0552471	-0.458564	-0.202445	-0.13924	-1.22784	-0.928672	-0.331989	-1.35261	-1.82017	0.397774
28.5	5.50844	0.237709	1.89229	2.6281	-1.38555	-0.223607	-0.744969	3.7557	10.9441	-0.263451		0.124478	1.26436	-0.813083	-0.504623	-0.770446	-2.72001	-0.120734	0.330934	3.08935	0.416707	0.213244	-0.780246	0.43152	0.163257	0.081864	-0.108443	-0.287973	-1.97574	-0.0922837	-1.12169	-0.340992	-0.457625	0.11246	-0.324893	-0.0917913	1.72155	-0.184203	0.513008	-0.260451	-0.312988	-0.582031	-1.53164	0.216678	-0.446245	1.23031	0.392695	0.0647957	2.56745
28.8	6.41146	-0.356563	2.9736	0.317681	-1.06885	-0.223607	-0.575658	1.09208	3.00538	0.0658627		0.290449	0.639983	-0.813083	1.8857	0.895384	-1.7861	0.684157	-1.87529	1.17559	-0.170205	-0.372131	1.59012	-0.298745	-0.89311	-0.0350845	-0.510083	-0.62025	0	-0.355951	-1.27641	-0.588986	0.0807572	0.214696	-0.324893	1.51456	-0.599642	3.17951	0.513008	0.686644	0.12374	0.303668	-1.53164	-0.505582	-0.446245	1.23031	-1.35261	-0.524255	1.48261
29.1	3.92815	-0.6537	0.270327	0.317681	-0.435458	-0.223607	-1.08359	-0.772449	3.00538	0.724491		1.61821	-0.608766	-1.66896	-1.3014	1.7283	-0.618714	2.56224	0.618702	0.628806	0.768854	-0.288506	-0.187654	0.298745	-0.412944	0.900503	-0.590411	0.819617	-0.423374	-0.421868	-0.812258	0.898979	0.619139	0.419167	-0.324893	2.89144	0.947821	-0.0240267	-0.575191	-0.57615	0.269316	-0.835087	-1.53164	-1.22784	-0.446245	-1.50372	-0.479959	-0.0530146	-0.687064
29.4	5.50844	-1.24797	1.35164	2.6281	-2.33564	-0.223607	-0.744969	0.292998	3.00538	-0.263451		0.124478	0.0156095	-0.622888	3.03659	0.895384	-1.7861	3.09883	0.906471	0.902201	-0.404969	0.882244	-0.385185	0.829846	0.355324	-0.152033	0.132541	1.70569	0.282249	1.29197	1.35376	1.51896	0.88833	1.13482	-0.324893	0.596646	-0.599642	-1.94615	-1.66339	-1.0497	-1.62317	-0.202445	-1.53164	-0.746335	1.24225	-1.11314	1.26535	-1.11331	0.0361614
29.7	4.15391	0.237709	0.810983	3.2057	-1.2272	-0.223607	0.270898	-0.239725	3.00538	0.395177		-0.539404	-1.85751	0.232989	0.911863	0.895384	-2.25305	-0.925625	-0.724217	1.72238	-0.874498	-0.0376313	-0.582715	0.365132	0.739457	1.66067	-0.0281147	1.15189	-0.423374	-0.224118	-0.193395	-0.340992	0.484543	-0.296484	-0.324893	0.367167	-1.76024	-0.504557	-2.28522	-1.68109	-0.458564	1.18937	-1.53164	-0.0240753	-0.687459	-0.331989	-1.35261	0.0647957	-0.506258
[truncated: 196 more columns]

## Sheet: 2I -Inh Zscore time course Pres
Time	INIHIBITORY Reward Phase	INIHIBITORY Reward Phase	Same Cells During Conflict	Same Cells During Conflict
	Time course	SEM	Time course	SEM
	-0.37091	0.181405	0.185164	0.214321
	-0.24479	0.198678	0.201954	0.196304
	-0.06927	0.17384	0.286428	0.214169
-6	-0.10175	0.1557	0.228438	0.183795
	0.114162	0.149093	0.052617	0.130433
	0.005402	0.1852	-0.02888	0.180348
	-0.48554	0.162474	0.041349	0.193448
	-0.23213	0.139781	-0.07683	0.194793
	-0.06068	0.215367	0.01038	0.153284
	-0.00535	0.156297	-0.285	0.122739
	0.178296	0.16614	-0.16286	0.184814
	0.0711	0.181529	-0.17584	0.181605
	0.11463	0.204112	0.127271	0.184875
-3	0.311476	0.164424	0.148391	0.178358
	0.266809	0.156416	-0.01963	0.137172
	0.100856	0.177174	-0.12652	0.154144
	0.168119	0.174054	0.142066	0.199022
	0.259046	0.189084	0.385751	0.198654
	-0.07621	0.192639	-0.0433	0.186433
	-0.10419	0.191844	0.068098	0.183576
	-0.09604	0.189374	0.036628	0.164789
	-0.15946	0.149607	-0.241	0.191668
	-0.26852	0.164428	-0.08111	0.179867
0	-1.42307	0.279948	-0.66176	0.282641
	-1.75133	0.316941	-0.75176	0.270927
	-1.21891	0.291252	-0.95405	0.263731
	-1.47428	0.211995	-0.3467	0.249688
	-0.6726	0.360736	-0.36871	0.224142
	-1.22126	0.264427	-0.20235	0.176591
	-1.18013	0.288762	0.289924	0.288838
	-1.24644	0.239749	-0.05731	0.294559
	-0.83073	0.316944	-0.10748	0.33179
	-0.76598	0.244113	-0.18158	0.344156
3	-0.58663	0.319692	0.1412	0.285538
	-0.71119	0.371129	0.100441	0.387692
	-0.65002	0.315951	0.138696	0.380459
	-0.09876	0.470297	0.340086	0.402369
	-0.14749	0.403339	0.636873	0.511174
	-0.5486	0.2938	0.045827	0.329466
	-0.44422	0.338953	-0.03627	0.319252
	0.062339	0.424695	0.113856	0.234331
	-0.34683	0.34757	0.237816	0.294915
	-0.08876	0.400714	0.334913	0.323051
6	-0.16183	0.304168	-0.02192	0.283041
	-0.44582	0.30972	0.185106	0.33659
	-0.3008	0.281615	0.20214	0.374798
	0.061104	0.318105	0.487523	0.323883

[truncated: 13 more sheets: 2K - Inh Cell Reward Pressers, 2L - Inh Cell Conflict Pressers, 2M - Changes food responses Non, 2N - Heatmap Conflict NonPresse, 2N - Heatmap Reward NonPressers, 2O - Data time course NonPresse, 2O - Exc Zscore time course Non, 2Q - Exc Cell Reward NonPresser, 2R - Exc Cell Conflict NonPress, 2S - Data time course NonPresse, 2S - Inh Zscore time course Non, 2U - Inh Cell Reward NonPresser, 2V - Inh Cell Conflict NonPress]
