# Supplementary material for: Neural correlates and determinants of approach–avoidance conflict in the prelimbic prefrontal cortex
Source: eLife. 2021 Dec 16;10:e74950. doi: 10.7554/eLife.74950 (PMC8853658; doi:10.7554/eLife.74950)
Supplement: Figure 3—figure supplement 1—source data 1. [file elife-74950-fig3-figsupp1-data1.xlsx]

## Sheet: A - Neurons % Freezing
	Excited	Inhibited	No Changes
Odor + Conflict (Pressers)	4	3	93
Odor + Conflict (Non-Pressers)	0	10	90

## Sheet: B - Neurons % Avoidance
	Excited	Inhibited	No Changes
Odor + Conflict (Pressers)	4	8	88
Odor + Conflict (Non-Pressers)	2	2	96

## Sheet: C - Neurons % Risk Assess
	Excited	Inhibited	No Changes
Odor + Conflict (Pressers)	5	8	87
Odor + Conflict (Non-Pressers)	6	5	89

## Sheet: D - Exc Cell Freezing
Time	Time course
-6	5
	4.16667
	3.125
	5
	5
	4.375
	3.95833
	3.54167
	2.70833
	3.54167
-3	3.125
	2.70833
	3.54167
	3.33333
	4.79167
	3.95833
	6.04167
	3.125
	5.625
	6.66667
0	6.25
	8.33333
	4.58333
	4.375
	4.375
	3.75
	3.125
	3.95833
	4.16667
	4.375
3	3.75
	3.95833
	4.16667
	5.625
	5.625
	4.375
	2.70833
	4.16667
	4.79167
	3.95833
6	3.75
0
15
30 sec

## Sheet: E - Exc Cell Avoidance
Time	Time course
-6	16.4035
	15.614
	19.8246
	17.5439
	17.4561
	18.5965
	15.3509
	16.2281
	16.1404
	12.8947
-3	17.2807
	17.8947
	15.5263
	18.2456
	16.3158
	22.1053
	24.2105
	26.2281
	27.6316
	31.1404
0	37.193
	31.9298
	26.1404
	23.5965
	22.193
	18.0702
	19.2105
	19.5614
	17.807
	18.2456
3	17.7193
	17.1053
	19.8246
	19.6491
	17.9825
	18.9474
	17.9825
	18.7719
	20
	15.7018
6	16.3158
0
15
30 sec

## Sheet: F - Exc Cell Risk Assess
Time	Time course
-6	6.66667
	7.84314
	7.05882
	6.47059
	6.47059
	4.11765
	6.47059
	7.84314
	5.09804
	6.47059
-3	7.2549
	4.70588
	6.47059
	9.21569
	4.11765
	6.47059
	8.23529
	14.7059
	13.3333
	11.1765
0	14.7059
	12.549
	9.41177
	8.82353
	8.82353
	9.41177
	9.80392
	9.80392
	9.01961
	5.68628
3	6.07843
	6.86275
	6.47059
	8.03922
	7.84314
	6.86275
	7.45098
	6.47059
	4.5098
	6.86275
6	6.27451
0
15
30 sec

## Sheet: G - Inh Cell Freezing
Time	Time course
-6	5
	4.33333
	12.6667
	10.6667
	11.3333
	8.33333
	10.6667
	9.33333
	5.66667
	10
-3	9.33333
	12.6667
	7.66667
	9.33333
	8.66667
	9.33333
	9.33333
	2.33333
	2
	2.66667
0	2.66667
	0.666667
	2.66667
	4.33333
	9
	15
	9.33333
	8.66667
	7
	7.33333
3	8.33333
	10.3333
	7.66667
	13
	11.3333
	13.3333
	11.6667
	10.6667
	8.33333
	7.33333
6	7.33333
0
15
30 sec

## Sheet: H - Inh Cell Avoidance
Time	Time course
-6	2.45614
	0.877193
	2.10526
	3.33333
	2.10526
	2.2807
	1.75439
	3.50877
	4.03509
	2.98246
-3	1.05263
	2.2807
	2.80702
	1.75439
	3.33333
	2.45614
	4.38596
	0.877193
	2.10526
	0.350877
0	0.175439
	0
	0
	0.350877
	1.40351
	1.92982
	2.98246
	1.05263
	0.877193
	1.57895
3	2.45614
	2.10526
	1.40351
	1.57895
	0.877193
	1.92982
	2.80702
	1.57895
	0.877193
	2.2807
6	2.45614
0
15
30 sec

## Sheet: I - Inh Cell Risk Assess
Time	Time course
-6	4.52381
	3.57143
	4.28571
	5.2381
	3.57143
	4.04762
	4.28571
	2.85714
	4.7619
	3.57143
-3	4.04762
	4.7619
	5
	3.57143
	3.09524
	4.28571
	3.33333
	4.04762
	3.33333
	1.90476
0	2.14286
	1.19048
	3.57143
	3.33333
	4.28571
	4.28571
	4.04762
	4.52381
	4.04762
	5.95238
3	4.7619
	4.04762
	4.28571
	5.2381
	4.28571
	4.04762
	4.7619
	4.52381
	4.04762
	4.52381
6	4.28571
0
15
30 sec

## Sheet: J - % responsive neurons
	#	%
Freezing	3	25
Avoidance	3	25
Risk-Assessment	5	42
F_A	0	0
F_RA	0	0
A_RA	1	8
F_A_RA	0	0

[truncated: 3 more sheets: K - Freezing heatmap onse, L - Hidden heatmap onset, M - Risk Assess. onset]
