# Supplementary material for: Neural correlates and determinants of approach–avoidance conflict in the prelimbic prefrontal cortex
Source: eLife. 2021 Dec 16;10:e74950. doi: 10.7554/eLife.74950 (PMC8853658; doi:10.7554/eLife.74950)
Supplement: Figure 3—source data 1. [file elife-74950-fig3-data1.xlsx]

## Sheet: 3A - Freezing % changes
	Excited	Inhibited	No Changes
Odor + Conflict (Pressers)	10	4	86
Odor + Conflict (Non-Pressers)	9	8	83

## Sheet: 3B - Avoidance % changes
	Excited	Inhibited	No Changes
Odor + Conflict (Pressers)	9	12	79
Odor + Conflict (Non-Pressers)	11	9	80

## Sheet: 3C - Risk-assessment % changes
	Excited	Inhibited	No Changes
Odor + Conflict (Pressers)	8	6	86
Odor + Conflict (Non-Pressers)	7	0	93

## Sheet: 3D - Exc Freezing onset
Time	Time course
-6	2.5
	4.16667
	2.5
	4.16667
	2.5
	3.75
	3.75
	4.58333
	2.08333
	2.91667
-3	4.16667
	4.16667
	6.66667
	5.41667
	4.58333
	2.5
	4.58333
	5.83333
	5
	6.66667
0	15.8333
	13.3333
	10.4167
	5
	6.25
	5
	5
	4.16667
	4.16667
	4.58333
3	5
	4.16667
	7.91667
	4.58333
	3.75
	3.33333
	4.58333
	4.16667
	2.5
	2.08333
6	5
0
15
30 sec

## Sheet: 3E - Exc Avoid onset
Time	Time course
-6	0.967742
	0.752688
	0.860215
	0.645161
	1.50538
	0.752688
	1.29032
	1.1828
	1.29032
	0.752688
-3	0.967742
	1.1828
	1.93548
	1.29032
	1.93548
	2.25807
	1.39785
	1.93548
	0.752688
	1.72043
0	3.76344
	6.55914
	5.16129
	5.80645
	5.05376
	3.54839
	3.22581
	4.30107
	3.76344
	3.65591
3	3.54839
	4.19355
	2.47312
	3.87097
	2.68817
	3.01075
	3.11828
	3.33333
	1.72043
	2.58065
6	2.58065
0
15
30 sec

## Sheet: 3F - Exc Risk Assess onset
Time	Time course
-6	3.04348
	3.18841
	3.33333
	3.62319
	3.33333
	5.50725
	3.76812
	4.2029
	3.62319
	4.78261
-3	4.49275
	3.62319
	4.34783
	5.36232
	2.46377
	2.31884
	3.91304
	2.46377
	2.6087
	2.46377
0	4.63768
	7.24638
	5.65217
	4.92754
	3.47826
	2.17391
	6.52174
	2.31884
	3.04348
	3.04348
3	5.21739
	4.05797
	2.89855
	2.46377
	2.17391
	2.89855
	2.6087
	3.47826
	5.07246
	3.76812
6	3.76812
0
15
30 sec

## Sheet: 3G - Inh Freezing onset
Time	Time course
-6	8.95833
	12.0833
	11.0417
	12.7083
	11.875
	7.91667
	12.7083
	10.4167
	13.5417
	12.2917
-3	12.7083
	12.5
	12.9167
	11.4583
	11.25
	10
	9.16667
	14.375
	11.875
	11.6667
0	13.9583
	8.33333
	7.70833
	10.4167
	7.29167
	11.4583
	9.79167
	9.16667
	5.20833
	9.375
3	7.5
	8.95833
	12.5
	11.875
	11.6667
	11.875
	12.9167
	9.58333
	8.125
	12.9167
6	12.2917
0
15
30 sec

## Sheet: 3H - Inh Avoid onset
Time	Time course
-6	9.03226
	9.67742
	8.27957
	10.3226
	8.17204
	8.27957
	8.17204
	10.4301
	8.92473
	8.17204
-3	9.03226
	6.88172
	7.74193
	9.35484
	7.74193
	9.24731
	9.56989
	10.1075
	10.215
	8.49462
0	6.12903
	4.30107
	5.37634
	4.73118
	5.48387
	6.55914
	7.41936
	6.66667
	6.23656
	7.2043
3	6.98925
	7.2043
	7.74193
	7.31183
	8.17204
	7.31183
	7.84946
	7.2043
	8.49462
	8.8172
6	8.92473
0
15
30 sec

## Sheet: 3I - Inh Risk Assess onset
Time	Time course
-6	16.6667
	14.2424
	11.8182
	12.4242
	14.5455
	15.4545
	10
	16.6667
	13.9394
	10.6061
-3	11.2121
	13.3333
	11.5152
	15.1515
	13.0303
	14.8485
	14.2424
	10.6061
	10.9091
	11.8182
0	13.0303
	9.09091
	8.78788
	6.36364
	5.75758
	10
	8.18182
	12.7273
	8.18182
	10.6061
3	12.7273
	15.1515
	9.39394
	12.1212
	12.1212
	8.78788
	10
	18.4849
	12.7273
	11.5152
6	12.4242
0
15
30 sec

## Sheet: 3J - Responsive neurons
Behavior	Percentage	Nr neurons
Freezing	38	11
Avoidance	31	9
Risk Assessment	21	6
Freezing-Avoidance	0	0
Freezing-Risk Assess.	0	0
Avoidance-Risk Assess.	7	2
A-RA-F	3	1
Nr Neurons responsive all behaviors	29

[truncated: 3 more sheets: 3K - Freezing onset, 3L - Avoidance onset, 3M - Risk Assessment onset]
