# Supplementary material for: Neural correlates and determinants of approach–avoidance conflict in the prelimbic prefrontal cortex
Source: eLife. 2021 Dec 16;10:e74950. doi: 10.7554/eLife.74950 (PMC8853658; doi:10.7554/eLife.74950)
Supplement: Figure 4—source data 1. [file elife-74950-fig4-data1.xlsx]

## Sheet: 4A - % Bands contribution
PRESSERS	%			NON-PRESSERS	%
Delta	76.749			Delta	58.482
Theta	14.665			Theta	26.097
Alpha	2.3677			Alpha	3.7973
Beta	4.1749			Beta	7.7069
Gamma	2.0434			Gamma	3.9166

## Sheet: 4B - Power Spectra 0-4Hz - Conf
Time	Non Pressers - Conflict	Non Pressers - Conflict	Pressers - Conflict	Pressers - Conflict
	Time course	SEM	Time course	SEM
0	0.013672	0.001154	0.02612	0.000378
	0.015188	0.003064	0.030196	0.000924
	0.016612	0.003618	0.034733	0.001082
	0.018549	0.003239	0.039614	0.001105
	0.020268	0.002889	0.044987	0.001382
	0.02158	0.002701	0.050447	0.001989
	0.022999	0.002732	0.056235	0.003079
	0.024337	0.002992	0.062527	0.004855
	0.026393	0.003623	0.068695	0.006683
	0.027821	0.004186	0.074995	0.00823
	0.029214	0.004893	0.08121	0.008802
	0.032172	0.005554	0.090699	0.008794
	0.035273	0.006566	0.100299	0.009498
	0.040001	0.007407	0.110791	0.009601
	0.044379	0.00741	0.122576	0.010951
	0.049134	0.007489	0.135185	0.012201
	0.053838	0.008101	0.148032	0.013635
	0.059531	0.007875	0.159375	0.015907
	0.065027	0.009441	0.170051	0.016629
	0.069091	0.007963	0.180792	0.017149
	0.072618	0.008383	0.191278	0.017363
	0.076044	0.009852	0.203391	0.01556
	0.079671	0.010978	0.214818	0.014913
	0.0831	0.017994	0.226349	0.01586
	0.085128	0.018828	0.237296	0.017895
	0.087755	0.020368	0.248298	0.018349
	0.090572	0.020339	0.25894	0.018476
	0.095187	0.019981	0.269164	0.016942
	0.097725	0.018524	0.279232	0.018657
	0.099514	0.014055	0.288681	0.019527
	0.10153	0.013326	0.297225	0.018877
	0.105562	0.012123	0.306174	0.019948
	0.107937	0.014887	0.315298	0.021303
	0.109382	0.015308	0.323938	0.020646
	0.109352	0.010494	0.331306	0.019626
	0.110315	0.014187	0.338741	0.018997
	0.111109	0.017548	0.343916	0.020571
	0.112511	0.030645	0.34935	0.021101
	0.111345	0.020297	0.357318	0.021324
	0.111005	0.015735	0.365954	0.022049
	0.111819	0.014059	0.37405	0.02044
	0.114876	0.023961	0.383618	0.020964
	0.115783	0.01641	0.390262	0.021178
	0.116461	0.013161	0.396448	0.021203
	0.116854	0.016491	0.400547	0.020505
	0.118991	0.020353	0.404471	0.020247
	0.120326	0.016383	0.40764	0.020911
	0.121732	0.021021	0.410917	0.021818
	0.120812	0.020504	0.416109	0.022669
	0.12224	0.024414	0.419134	0.023274
	0.124661	0.02364	0.422371	0.023069
	0.127523	0.029811	0.42435	0.024518
	0.128079	0.019057	0.426474	0.02201
	0.130613	0.018535	0.428128	0.021911
	0.133945	0.019831	0.430472	0.023232
	0.137121	0.0193	0.432262	0.023251
	0.138099	0.019013	0.43218	0.022279
	0.139534	0.02769	0.434571	0.023565
	0.140414	0.027085	0.435627	0.025509
	0.142187	0.021992	0.434984	0.023043
	0.143126	0.023709	0.435168	0.023264
	0.143765	0.03033	0.432422	0.02204
	0.142605	0.027833	0.428495	0.023101
	0.143189	0.026857	0.426741	0.022925
	0.14474	0.028111	0.426089	0.022099
	0.145124	0.026051	0.428711	0.021838
	0.145917	0.022628	0.430551	0.020903
	0.146312	0.021757	0.430269	0.022246
	0.148139	0.023168	0.431401	0.021858
	0.148695	0.024224	0.43021	0.020501
	0.149447	0.021521	0.428732	0.021552
	0.148884	0.0194	0.426594	0.022925
	0.148023	0.016599	0.426271	0.023619
	0.147278	0.017502	0.424685	0.022783
	0.145993	0.021862	0.423199	0.022792
	0.143616	0.016528	0.421805	0.023423
	0.142251	0.019584	0.421409	0.02403
	0.141301	0.017606	0.421352	0.024675
	0.142151	0.024394	0.420258	0.027371
	0.141081	0.017455	0.418785	0.024439
	0.14198	0.020338	0.415856	0.021597
	0.142522	0.018247	0.412845	0.021629
	0.143439	0.015143	0.41236	0.021574
	0.144188	0.013905	0.411779	0.019933
	0.144415	0.017996	0.41049	0.019358
	0.143633	0.017109	0.409281	0.021931
	0.144645	0.017374	0.405002	0.022239
	0.145012	0.020896	0.399635	0.022101
	0.146863	0.030979	0.3964	0.021091
	0.145524	0.016986	0.390866	0.019001
	0.146644	0.019302	0.387007	0.017715
	0.146906	0.018078	0.385263	0.020277
	0.147048	0.02192	0.383464	0.019044
	0.14716	0.018089	0.382383	0.019418
	0.146955	0.015026	0.380599	0.021076
	0.147609	0.01745	0.377186	0.019713
	0.148838	0.018238	0.375161	0.018487
	0.148457	0.015136	0.37373	0.017045
	0.149495	0.025008	0.371025	0.018281
	0.147652	0.022288	0.367772	0.016909
	0.149753	0.026351	0.365382	0.017684
	0.149669	0.023402	0.363222	0.017701
	0.149319	0.015724	0.359466	0.017009
	0.148575	0.019189	0.357238	0.019456
	0.147803	0.016693	0.354614	0.018765
	0.150297	0.020282	0.351626	0.016073
	0.151047	0.014498	0.346736	0.016793
	0.151368	0.017163	0.343611	0.018926
	0.150783	0.019343	0.342572	0.016141
	0.148639	0.015344	0.340772	0.01521
	0.150646	0.025309	0.339456	0.017004
	0.150497	0.019207	0.33596	0.015219
	0.150144	0.01714	0.333247	0.014561
	0.14951	0.018636	0.330587	0.016281
	0.14997	0.019876	0.325595	0.015668
	0.150983	0.026346	0.321146	0.015837
	0.151242	0.015349	0.31921	0.013602
	0.151536	0.016889	0.315628	0.017906
	0.152171	0.016074	0.310781	0.01494
	0.153521	0.015013	0.308277	0.014496
	0.154945	0.027882	0.305261	0.014821
	0.153205	0.017206	0.302573	0.012786
	0.152566	0.015373	0.300649	0.013952
	0.153891	0.012817	0.298518	0.013028
	0.154261	0.016414	0.295031	0.012732
	0.154036	0.016618	0.292003	0.011997
	0.152321	0.017676	0.288887	0.012513
	0.152733	0.015445	0.2873	0.012611
	0.153092	0.013836	0.284165	0.014247
	0.154092	0.015075	0.281023	0.013797
	0.155612	0.014828	0.279089	0.011037
	0.153623	0.013021	0.276863	0.011802
1	0.154151	0.018672	0.276295	0.011866
	0.155521	0.022474	0.273323	0.011767
	0.155889	0.013311	0.270379	0.012089
	0.155343	0.013317	0.268298	0.012149
	0.155772	0.014336	0.266447	0.01153
	0.156011	0.014796	0.263969	0.01239
	0.155674	0.012953	0.26176	0.010678
	0.155496	0.014541	0.259998	0.011405
	0.153739	0.013296	0.25719	0.012593
	0.151859	0.013041	0.254484	0.01251
	0.15298	0.020192	0.251459	0.012685
	0.153446	0.019632	0.24916	0.01233
	0.152796	0.014084	0.24715	0.01083
	0.154661	0.020851	0.244852	0.011022
	0.158094	0.023813	0.242395	0.011063
	0.158544	0.019907	0.240525	0.009761
	0.157815	0.012727	0.238147	0.010445
	0.157872	0.012156	0.236917	0.009747
	0.157035	0.013224	0.235953	0.009317
	0.155768	0.011363	0.234726	0.009007
	0.155988	0.020251	0.233591	0.009767
	0.154365	0.017245	0.231565	0.009487
	0.1531	0.014675	0.230042	0.00954
	0.153244	0.015648	0.228304	0.009685
	0.154776	0.028818	0.226977	0.01105
	0.153665	0.018957	0.225619	0.010071
	0.153043	0.02073	0.223966	0.010014
	0.153475	0.020075	0.221886	0.010519
	0.152974	0.013208	0.220532	0.0102
	0.152697	0.010729	0.219351	0.009767
	0.153204	0.014083	0.218797	0.010043
	0.151957	0.011888	0.217798	0.011784
	0.150402	0.01289	0.216862	0.009819
	0.149286	0.012826	0.216203	0.00977
	0.146503	0.024201	0.215575	0.010439
	0.142313	0.011811	0.214174	0.008439
	0.140976	0.017659	0.212335	0.008804
	0.141433	0.020071	0.210999	0.009433
	0.140707	0.013357	0.209628	0.008858
	0.140236	0.014782	0.208128	0.009161
	0.139933	0.015874	0.206046	0.009027
	0.139752	0.015006	0.203703	0.008414
	0.139268	0.008899	0.201107	0.007942
	0.13776	0.011385	0.199099	0.007795
	0.136954	0.009483	0.198003	0.007782
	0.134998	0.01303	0.197253	0.008234
	0.13535	0.014127	0.195815	0.00782
	0.135286	0.01976	0.1946	0.009019
	0.134014	0.009156	0.19359	0.00852
	0.133897	0.009349	0.191843	0.008754
	0.133664	0.007938	0.189661	0.007878
	0.133973	0.016905	0.187322	0.008244
	0.133471	0.020358	0.185748	0.008932
	0.133218	0.032346	0.184575	0.01055
	0.132599	0.019864	0.182907	0.008275
	0.132537	0.012754	0.180775	0.007977
	0.133835	0.010046	0.17856	0.007231
	0.133659	0.015141	0.176204	0.007241
	0.131914	0.011677	0.173939	0.007387
	0.131549	0.013882	0.171562	0.007232
	0.130849	0.011491	0.169353	0.007168
	0.130403	0.01269	0.166769	0.007439
	0.130023	0.007674	0.165391	0.006935
	0.130283	0.009675	0.163799	0.007222
	0.131642	0.013312	0.162556	0.008248
	0.131629	0.021971	0.161248	0.008025
	0.131512	0.021718	0.15948	0.007442
	0.129847	0.017555	0.158014	0.006756
	0.128322	0.010995	0.156826	0.005563
	0.129064	0.011712	0.155346	0.00512
	0.128312	0.010414	0.154095	0.005398
	0.127458	0.014132	0.153646	0.005606
	0.126558	0.020447	0.153348	0.007432
	0.126368	0.014946	0.15263	0.006625
	0.126929	0.014134	0.151041	0.006468
	0.126357	0.007082	0.149691	0.005877
	0.125703	0.007231	0.149106	0.005606
	0.124057	0.009647	0.148597	0.0049
	0.123297	0.017434	0.148031	0.007071
	0.123852	0.022506	0.147255	0.007577
	0.122909	0.014101	0.146005	0.006203
	0.122593	0.007709	0.144556	0.005648
	0.123042	0.008056	0.144058	0.005083
	0.12247	0.010407	0.142677	0.00608
	0.122515	0.020911	0.14147	0.007706
	0.121311	0.016579	0.140153	0.006562
	0.120982	0.011191	0.138715	0.00541
	0.120533	0.008431	0.137071	0.004516
	0.12105	0.012138	0.13568	0.005079
	0.121543	0.017957	0.134366	0.006131
	0.119969	0.011218	0.133471	0.0048
	0.119994	0.013593	0.132271	0.005136
	0.121379	0.018223	0.130516	0.006813
	0.120878	0.011565	0.129037	0.005321
	0.121037	0.008714	0.128274	0.004595
	0.120613	0.007644	0.127583	0.004938
	0.120679	0.010057	0.126463	0.004914
	0.120186	0.015718	0.124972	0.005664
	0.120039	0.014075	0.123772	0.004953
	0.120182	0.01075	0.122645	0.00464
	0.119513	0.008563	0.122066	0.005136
	0.119353	0.008956	0.121818	0.00476
	0.119358	0.011436	0.121392	0.004523
	0.118889	0.008864	0.120277	0.004484
	0.119235	0.01146	0.119614	0.005241
	0.119845	0.012595	0.118843	0.005208
	0.118945	0.007381	0.117917	0.003761
	0.118153	0.004929	0.117235	0.00339
	0.117728	0.005812	0.116819	0.003657
	0.116929	0.007773	0.116384	0.004225
	0.116436	0.012791	0.115808	0.005033
	0.115918	0.016462	0.114653	0.005524
	0.115637	0.010015	0.113989	0.004342
	0.114437	0.006178	0.113386	0.003918
	0.114914	0.008239	0.112309	0.004209
	0.116082	0.013103	0.110868	0.005012
	0.115845	0.008557	0.109581	0.004175
	0.116599	0.008689	0.109063	0.004405
	0.116701	0.008367	0.108723	0.004312
	0.116521	0.006382	0.108373	0.003635
	0.116809	0.007682	0.108164	0.003687
	0.116652	0.007533	0.10761	0.003849
	0.116777	0.007667	0.106559	0.003803
	0.116606	0.010535	0.105561	0.004411
	0.116341	0.011376	0.105099	0.004479
	0.115866	0.01493	0.103959	0.005271
	0.114227	0.006153	0.103083	0.003504
	0.11545	0.007284	0.102128	0.003719
	0.115689	0.005665	0.101233	0.003368
	0.115634	0.0058	0.100302	0.003189
	0.116474	0.007198	0.099669	0.00337
2	0.116978	0.007668	0.099033	0.003631
	0.117877	0.007919	0.098523	0.003549
	0.118445	0.009153	0.097432	0.003462
	0.11922	0.006396	0.096106	0.003248
	0.118739	0.006819	0.09499	0.003238
	0.117194	0.008011	0.093943	0.003377
	0.118186	0.009622	0.093475	0.00388
	0.117785	0.008061	0.093213	0.003597
	0.118724	0.00752	0.092643	0.003619
	0.119538	0.009675	0.092008	0.004006
	0.119324	0.01252	0.091133	0.004345
	0.119628	0.008327	0.090268	0.003419
	0.119708	0.009794	0.089773	0.00374
	0.119537	0.008333	0.089248	0.003283
	0.119135	0.007965	0.088487	0.003273
	0.118909	0.008271	0.088097	0.003556
	0.119358	0.010292	0.087833	0.004084
	0.118715	0.010056	0.087712	0.004134
	0.119461	0.012098	0.087317	0.004142
	0.120168	0.009346	0.086549	0.003434
	0.119884	0.006495	0.085938	0.002946
	0.119409	0.007101	0.085088	0.003137
	0.118594	0.010195	0.084171	0.003538
	0.118171	0.008315	0.083838	0.003416
	0.116908	0.007256	0.083659	0.003195
	0.116768	0.007966	0.083443	0.003364
	0.115927	0.008262	0.082833	0.003517
	0.114003	0.007296	0.082024	0.003439
	0.113405	0.008548	0.081128	0.003789
	0.112765	0.007146	0.080753	0.003104
	0.112501	0.006927	0.080157	0.003145
	0.11238	0.006804	0.07983	0.003216
	0.111811	0.005722	0.079222	0.002933
	0.111308	0.006442	0.078546	0.003081
	0.111351	0.005658	0.077852	0.002775
	0.111106	0.005711	0.077242	0.002811
	0.110042	0.005181	0.076656	0.00285
	0.108849	0.006568	0.075768	0.003367
	0.107725	0.005731	0.074751	0.003279
	0.106671	0.006938	0.074063	0.003121
	0.105306	0.006602	0.073665	0.002893
	0.103907	0.008112	0.072954	0.00326
	0.102931	0.01006	0.072385	0.003794
	0.10257	0.008889	0.072383	0.003437
	0.101458	0.008453	0.072064	0.003132
	0.100806	0.007209	0.071705	0.002936
	0.099327	0.006989	0.071406	0.002884
	0.099023	0.007461	0.071101	0.002956
	0.099181	0.006762	0.070565	0.002788
	0.099034	0.006961	0.069767	0.002916
	0.098725	0.007549	0.068772	0.003019
	0.098084	0.00752	0.068209	0.002864
	0.09788	0.005863	0.067839	0.002715
	0.096863	0.006045	0.067502	0.002885
	0.096449	0.005482	0.067284	0.002705
	0.095754	0.006009	0.067044	0.002762
	0.095765	0.005669	0.066844	0.002605
	0.096498	0.007304	0.066556	0.002916
	0.09685	0.008303	0.066353	0.003228
	0.0972	0.007122	0.066095	0.002924
	0.096953	0.006135	0.065849	0.002741
	0.096587	0.006753	0.065714	0.00291
	0.097481	0.009154	0.065727	0.003324
	0.097405	0.00427	0.065717	0.002176
	0.097296	0.005932	0.065315	0.002531
	0.097173	0.007651	0.064739	0.002872
	0.097461	0.008518	0.06428	0.003211
	0.098073	0.008376	0.063776	0.003402
	0.097851	0.006226	0.063515	0.003004
	0.097378	0.006659	0.063405	0.002944
	0.096449	0.006758	0.063166	0.003456
	0.095738	0.005676	0.062958	0.003129
	0.095297	0.008116	0.062727	0.003504
	0.094738	0.005484	0.062618	0.002979
	0.094954	0.006251	0.062698	0.002953
	0.094318	0.007032	0.062532	0.002985
	0.094467	0.006748	0.062107	0.00292
	0.094225	0.006993	0.061753	0.002807
	0.093288	0.007306	0.061268	0.002924
	0.092756	0.00502	0.060909	0.00277
	0.091972	0.005225	0.060685	0.002496
	0.091058	0.004707	0.05996	0.002685
	0.090482	0.004234	0.059338	0.002858
	0.088971	0.006631	0.058931	0.004282
	0.088135	0.008846	0.058522	0.00477
	0.087089	0.006978	0.058132	0.003061
	0.086414	0.00725	0.057883	0.002909
	0.085519	0.006855	0.057494	0.002833
	0.084632	0.00649	0.057196	0.002927
	0.084505	0.005191	0.057116	0.002617
	0.084471	0.005886	0.05691	0.002508
	0.084321	0.00539	0.056606	0.002461
	0.083942	0.004703	0.056203	0.002212
	0.083431	0.003586	0.055829	0.00209
	0.082572	0.004223	0.055095	0.002313
	0.082232	0.004411	0.054275	0.002594
	0.082135	0.006746	0.05381	0.002847
	0.081273	0.003944	0.053491	0.002171
	0.080865	0.003975	0.052888	0.002279
	0.081172	0.004585	0.052533	0.003058
	0.081503	0.005851	0.052166	0.003286
	0.081802	0.005641	0.051644	0.002774
	0.082039	0.004574	0.05138	0.002666
	0.082889	0.004017	0.051168	0.002376
	0.083504	0.005036	0.050767	0.002216
	0.083967	0.00631	0.050471	0.002465
	0.084261	0.004676	0.049801	0.002443
	0.08454	0.005294	0.049274	0.002727
	0.08501	0.00467	0.048914	0.002497
	0.084825	0.005847	0.048608	0.00262
	0.084468	0.007023	0.048103	0.002672
	0.083275	0.005691	0.047532	0.002493
	0.082579	0.004501	0.047038	0.002348
	0.082225	0.006131	0.046521	0.002718
	0.08202	0.00521	0.046243	0.002653
	0.081971	0.00589	0.045843	0.002603
	0.081514	0.003648	0.045469	0.002243
	0.08104	0.004177	0.044975	0.002486
	0.080762	0.005766	0.044595	0.002672
	0.080122	0.003301	0.044524	0.002044
	0.079381	0.005913	0.044282	0.002628
	0.078348	0.003237	0.043976	0.001852
	0.07756	0.004108	0.043755	0.002022
	0.077139	0.005526	0.043657	0.002452
	0.075995	0.005907	0.043448	0.002572
	0.075091	0.005354	0.043195	0.002374
	0.074056	0.004215	0.042952	0.002312
	0.07396	0.004892	0.043005	0.002398
	0.073836	0.004222	0.042933	0.002234
	0.072999	0.004804	0.042796	0.002396
	0.073069	0.005289	0.042666	0.002374
3	0.072633	0.004332	0.042412	0.002
	0.07279	0.003703	0.042221	0.001945
	0.072977	0.004652	0.042082	0.002213
	0.072714	0.004931	0.042127	0.002253
	0.072314	0.003998	0.041928	0.002184
	0.071521	0.004113	0.041863	0.002085
	0.071072	0.005668	0.041747	0.002549
	0.07059	0.006112	0.0418	0.002604
	0.070345	0.00392	0.041734	0.002188
	0.070485	0.003884	0.041529	0.002177
	0.070643	0.003643	0.041499	0.001958
	0.070678	0.006232	0.041547	0.002489
	0.071107	0.004054	0.041492	0.002085
	0.07118	0.003249	0.0412	0.001787
	0.070944	0.003714	0.040902	0.001935
	0.070771	0.004386	0.040697	0.002149
	0.070723	0.003985	0.040625	0.002114
	0.070528	0.003852	0.040541	0.002237
	0.070303	0.005347	0.040332	0.002552
	0.070466	0.004514	0.040104	0.002305
	0.070767	0.005115	0.039905	0.002482
	0.070488	0.003957	0.039788	0.002174
	0.070379	0.004033	0.039516	0.002264
	0.069888	0.003839	0.039344	0.002052
	0.069609	0.003693	0.039285	0.001968
	0.069426	0.003265	0.039077	0.001812
	0.069565	0.003185	0.038998	0.001882
	0.069781	0.003617	0.038942	0.002126
	0.069767	0.005801	0.038699	0.002414
	0.069557	0.00417	0.038539	0.002038
	0.069106	0.004777	0.038344	0.002331
	0.068143	0.00333	0.038173	0.002054
	0.067999	0.003518	0.037909	0.002011
	0.067381	0.004004	0.037703	0.002263
	0.066799	0.003017	0.037468	0.002224
	0.066514	0.003204	0.037265	0.002069
	0.066135	0.003368	0.036904	0.002035
	0.066132	0.004061	0.036458	0.002075
	0.065454	0.005095	0.036146	0.002228
	0.064465	0.006207	0.036115	0.002498
	0.063879	0.004545	0.036113	0.002146
	0.063118	0.004586	0.035947	0.002126
	0.062949	0.004475	0.035716	0.002384
	0.062639	0.003735	0.035574	0.002086
	0.062814	0.003603	0.035445	0.001997
	0.062759	0.003317	0.035139	0.001914
	0.062693	0.004138	0.035037	0.00188
	0.06243	0.005983	0.035155	0.002303
	0.061875	0.003766	0.035318	0.002103
	0.062003	0.003863	0.035452	0.002439
	0.061739	0.004249	0.035358	0.002203
	0.061354	0.003934	0.035129	0.002123
	0.061092	0.004825	0.034985	0.002197
	0.060498	0.00416	0.034788	0.001853
	0.06006	0.005167	0.034624	0.002115
	0.059948	0.003704	0.034601	0.001887
	0.05998	0.004314	0.034507	0.002325
	0.059884	0.00318	0.034524	0.003577
	0.059195	0.003558	0.034602	0.003887
	0.058758	0.004124	0.034697	0.0026
	0.058572	0.003334	0.034605	0.001909
	0.058451	0.005068	0.034357	0.002168
	0.058063	0.004488	0.034207	0.002014
	0.057862	0.002847	0.034044	0.001787
	0.057892	0.003233	0.034016	0.001863
	0.057537	0.00435	0.033891	0.002039
	0.057355	0.004125	0.03375	0.002106
	0.057094	0.003776	0.033438	0.001997
	0.057128	0.003189	0.032979	0.001979
	0.057004	0.003262	0.032496	0.002098
	0.056547	0.004516	0.032139	0.002206
	0.056468	0.005106	0.03184	0.002
	0.05643	0.004444	0.03172	0.001912
	0.056372	0.004174	0.031528	0.002113
	0.056751	0.004775	0.031311	0.002139
	0.056695	0.004919	0.031079	0.002054
	0.056694	0.00361	0.030788	0.001706
	0.056582	0.00291	0.030634	0.001593
	0.056655	0.003708	0.030559	0.001827
	0.056873	0.004233	0.030327	0.001948
	0.056922	0.005157	0.029848	0.0022
	0.056907	0.004273	0.029657	0.002032
	0.056924	0.004246	0.029784	0.001999
	0.057044	0.004782	0.030122	0.00212
	0.057137	0.005463	0.030236	0.002234
	0.056903	0.003783	0.030176	0.001809
	0.056923	0.004185	0.03018	0.002
	0.05693	0.003597	0.030117	0.001923
	0.056787	0.003423	0.030035	0.002022
	0.056277	0.003669	0.029847	0.002045
	0.056213	0.004365	0.029733	0.002044
	0.056437	0.003917	0.029919	0.002235
	0.056311	0.003889	0.030285	0.00286
	0.056548	0.004124	0.030453	0.003175
	0.057019	0.005424	0.030477	0.002729
	0.05644	0.002832	0.030606	0.001986
	0.056446	0.002866	0.030796	0.002006
	0.056345	0.002889	0.030939	0.001872
	0.056274	0.003583	0.030817	0.001972
	0.056045	0.003147	0.030604	0.001786
	0.055768	0.002763	0.03048	0.002061
	0.0559	0.00353	0.030551	0.002927
	0.055955	0.003735	0.030385	0.002977
	0.055581	0.00572	0.030019	0.002528
	0.055341	0.00545	0.029509	0.002321
	0.055479	0.004415	0.029243	0.002088
	0.055605	0.003579	0.029036	0.001997
	0.055437	0.002985	0.028919	0.001951
	0.055621	0.00424	0.028841	0.002089
	0.055896	0.005137	0.028924	0.002272
	0.056372	0.00382	0.028914	0.002064
	0.056455	0.003349	0.028767	0.002057
	0.056222	0.004038	0.028307	0.002157
	0.056293	0.00494	0.02783	0.002294
	0.055911	0.004343	0.027723	0.002075
	0.055399	0.005384	0.027905	0.002271
	0.055142	0.004564	0.027847	0.002241
	0.054769	0.006545	0.027559	0.002527
	0.054533	0.004373	0.027345	0.002003
	0.054376	0.003867	0.027337	0.001961
	0.054299	0.003282	0.027276	0.001914
	0.054275	0.003585	0.027118	0.001925
	0.054063	0.006082	0.027011	0.002364
	0.053844	0.005408	0.026949	0.002165
	0.053925	0.004146	0.026874	0.002072
	0.053895	0.00564	0.026854	0.002573
	0.05329	0.003799	0.026793	0.002003
	0.05291	0.003618	0.0267	0.001703
	0.05299	0.004316	0.026474	0.001888
	0.05272	0.003429	0.026363	0.001754
	0.052432	0.003333	0.026378	0.001743
4	0.052092	0.003916	0.02638	0.001832

## Sheet: 4B - Power Spectra 0-4Hz -  (2)
Time	Non Pressers - Conflict	Non Pressers - Conflict	Pressers - Conflict	Pressers - Conflict
	Time course	SEM	Time course	SEM
0	0.013672	0.001154	0.02612	0.000378
	0.015188	0.003064	0.030196	0.000924
	0.016612	0.003618	0.034733	0.001082
	0.018549	0.003239	0.039614	0.001105
	0.020268	0.002889	0.044987	0.001382
	0.02158	0.002701	0.050447	0.001989
	0.022999	0.002732	0.056235	0.003079
	0.024337	0.002992	0.062527	0.004855
	0.026393	0.003623	0.068695	0.006683
	0.027821	0.004186	0.074995	0.00823
	0.029214	0.004893	0.08121	0.008802
	0.032172	0.005554	0.090699	0.008794
	0.035273	0.006566	0.100299	0.009498
	0.040001	0.007407	0.110791	0.009601
	0.044379	0.00741	0.122576	0.010951
	0.049134	0.007489	0.135185	0.012201
	0.053838	0.008101	0.148032	0.013635
	0.059531	0.007875	0.159375	0.015907
	0.065027	0.009441	0.170051	0.016629
	0.069091	0.007963	0.180792	0.017149
	0.072618	0.008383	0.191278	0.017363
	0.076044	0.009852	0.203391	0.01556
	0.079671	0.010978	0.214818	0.014913
	0.0831	0.017994	0.226349	0.01586
	0.085128	0.018828	0.237296	0.017895
	0.087755	0.020368	0.248298	0.018349
	0.090572	0.020339	0.25894	0.018476
	0.095187	0.019981	0.269164	0.016942
	0.097725	0.018524	0.279232	0.018657
	0.099514	0.014055	0.288681	0.019527
	0.10153	0.013326	0.297225	0.018877
	0.105562	0.012123	0.306174	0.019948
	0.107937	0.014887	0.315298	0.021303
	0.109382	0.015308	0.323938	0.020646
	0.109352	0.010494	0.331306	0.019626
	0.110315	0.014187	0.338741	0.018997
	0.111109	0.017548	0.343916	0.020571
	0.112511	0.030645	0.34935	0.021101
	0.111345	0.020297	0.357318	0.021324
	0.111005	0.015735	0.365954	0.022049
	0.111819	0.014059	0.37405	0.02044
	0.114876	0.023961	0.383618	0.020964
	0.115783	0.01641	0.390262	0.021178
	0.116461	0.013161	0.396448	0.021203
	0.116854	0.016491	0.400547	0.020505
	0.118991	0.020353	0.404471	0.020247
	0.120326	0.016383	0.40764	0.020911
	0.121732	0.021021	0.410917	0.021818
	0.120812	0.020504	0.416109	0.022669
	0.12224	0.024414	0.419134	0.023274
	0.124661	0.02364	0.422371	0.023069
	0.127523	0.029811	0.42435	0.024518
	0.128079	0.019057	0.426474	0.02201
	0.130613	0.018535	0.428128	0.021911
	0.133945	0.019831	0.430472	0.023232
	0.137121	0.0193	0.432262	0.023251
	0.138099	0.019013	0.43218	0.022279
	0.139534	0.02769	0.434571	0.023565
	0.140414	0.027085	0.435627	0.025509
	0.142187	0.021992	0.434984	0.023043
	0.143126	0.023709	0.435168	0.023264
	0.143765	0.03033	0.432422	0.02204
	0.142605	0.027833	0.428495	0.023101
	0.143189	0.026857	0.426741	0.022925
	0.14474	0.028111	0.426089	0.022099
	0.145124	0.026051	0.428711	0.021838
	0.145917	0.022628	0.430551	0.020903
	0.146312	0.021757	0.430269	0.022246
	0.148139	0.023168	0.431401	0.021858
	0.148695	0.024224	0.43021	0.020501
	0.149447	0.021521	0.428732	0.021552
	0.148884	0.0194	0.426594	0.022925
	0.148023	0.016599	0.426271	0.023619
	0.147278	0.017502	0.424685	0.022783
	0.145993	0.021862	0.423199	0.022792
	0.143616	0.016528	0.421805	0.023423
	0.142251	0.019584	0.421409	0.02403
	0.141301	0.017606	0.421352	0.024675
	0.142151	0.024394	0.420258	0.027371
	0.141081	0.017455	0.418785	0.024439
	0.14198	0.020338	0.415856	0.021597
	0.142522	0.018247	0.412845	0.021629
	0.143439	0.015143	0.41236	0.021574
	0.144188	0.013905	0.411779	0.019933
	0.144415	0.017996	0.41049	0.019358
	0.143633	0.017109	0.409281	0.021931
	0.144645	0.017374	0.405002	0.022239
	0.145012	0.020896	0.399635	0.022101
	0.146863	0.030979	0.3964	0.021091
	0.145524	0.016986	0.390866	0.019001
	0.146644	0.019302	0.387007	0.017715
	0.146906	0.018078	0.385263	0.020277
	0.147048	0.02192	0.383464	0.019044
	0.14716	0.018089	0.382383	0.019418
	0.146955	0.015026	0.380599	0.021076
	0.147609	0.01745	0.377186	0.019713
	0.148838	0.018238	0.375161	0.018487
	0.148457	0.015136	0.37373	0.017045
	0.149495	0.025008	0.371025	0.018281
	0.147652	0.022288	0.367772	0.016909
	0.149753	0.026351	0.365382	0.017684
	0.149669	0.023402	0.363222	0.017701
	0.149319	0.015724	0.359466	0.017009
	0.148575	0.019189	0.357238	0.019456
	0.147803	0.016693	0.354614	0.018765
	0.150297	0.020282	0.351626	0.016073
	0.151047	0.014498	0.346736	0.016793
	0.151368	0.017163	0.343611	0.018926
	0.150783	0.019343	0.342572	0.016141
	0.148639	0.015344	0.340772	0.01521
	0.150646	0.025309	0.339456	0.017004
	0.150497	0.019207	0.33596	0.015219
	0.150144	0.01714	0.333247	0.014561
	0.14951	0.018636	0.330587	0.016281
	0.14997	0.019876	0.325595	0.015668
	0.150983	0.026346	0.321146	0.015837
	0.151242	0.015349	0.31921	0.013602
	0.151536	0.016889	0.315628	0.017906
	0.152171	0.016074	0.310781	0.01494
	0.153521	0.015013	0.308277	0.014496
	0.154945	0.027882	0.305261	0.014821
	0.153205	0.017206	0.302573	0.012786
	0.152566	0.015373	0.300649	0.013952
	0.153891	0.012817	0.298518	0.013028
	0.154261	0.016414	0.295031	0.012732
	0.154036	0.016618	0.292003	0.011997
	0.152321	0.017676	0.288887	0.012513
	0.152733	0.015445	0.2873	0.012611
	0.153092	0.013836	0.284165	0.014247
	0.154092	0.015075	0.281023	0.013797
	0.155612	0.014828	0.279089	0.011037
	0.153623	0.013021	0.276863	0.011802
1	0.154151	0.018672	0.276295	0.011866
	0.155521	0.022474	0.273323	0.011767
	0.155889	0.013311	0.270379	0.012089
	0.155343	0.013317	0.268298	0.012149
	0.155772	0.014336	0.266447	0.01153
	0.156011	0.014796	0.263969	0.01239
	0.155674	0.012953	0.26176	0.010678
	0.155496	0.014541	0.259998	0.011405
	0.153739	0.013296	0.25719	0.012593
	0.151859	0.013041	0.254484	0.01251
	0.15298	0.020192	0.251459	0.012685
	0.153446	0.019632	0.24916	0.01233
	0.152796	0.014084	0.24715	0.01083
	0.154661	0.020851	0.244852	0.011022
	0.158094	0.023813	0.242395	0.011063
	0.158544	0.019907	0.240525	0.009761
	0.157815	0.012727	0.238147	0.010445
	0.157872	0.012156	0.236917	0.009747
	0.157035	0.013224	0.235953	0.009317
	0.155768	0.011363	0.234726	0.009007
	0.155988	0.020251	0.233591	0.009767
	0.154365	0.017245	0.231565	0.009487
	0.1531	0.014675	0.230042	0.00954
	0.153244	0.015648	0.228304	0.009685
	0.154776	0.028818	0.226977	0.01105
	0.153665	0.018957	0.225619	0.010071
	0.153043	0.02073	0.223966	0.010014
	0.153475	0.020075	0.221886	0.010519
	0.152974	0.013208	0.220532	0.0102
	0.152697	0.010729	0.219351	0.009767
	0.153204	0.014083	0.218797	0.010043
	0.151957	0.011888	0.217798	0.011784
	0.150402	0.01289	0.216862	0.009819
	0.149286	0.012826	0.216203	0.00977
	0.146503	0.024201	0.215575	0.010439
	0.142313	0.011811	0.214174	0.008439
	0.140976	0.017659	0.212335	0.008804
	0.141433	0.020071	0.210999	0.009433
	0.140707	0.013357	0.209628	0.008858
	0.140236	0.014782	0.208128	0.009161
	0.139933	0.015874	0.206046	0.009027
	0.139752	0.015006	0.203703	0.008414
	0.139268	0.008899	0.201107	0.007942
	0.13776	0.011385	0.199099	0.007795
	0.136954	0.009483	0.198003	0.007782
	0.134998	0.01303	0.197253	0.008234
	0.13535	0.014127	0.195815	0.00782
	0.135286	0.01976	0.1946	0.009019
	0.134014	0.009156	0.19359	0.00852
	0.133897	0.009349	0.191843	0.008754
	0.133664	0.007938	0.189661	0.007878
	0.133973	0.016905	0.187322	0.008244
	0.133471	0.020358	0.185748	0.008932
	0.133218	0.032346	0.184575	0.01055
	0.132599	0.019864	0.182907	0.008275
	0.132537	0.012754	0.180775	0.007977
	0.133835	0.010046	0.17856	0.007231
	0.133659	0.015141	0.176204	0.007241
	0.131914	0.011677	0.173939	0.007387
	0.131549	0.013882	0.171562	0.007232
	0.130849	0.011491	0.169353	0.007168
	0.130403	0.01269	0.166769	0.007439
	0.130023	0.007674	0.165391	0.006935
	0.130283	0.009675	0.163799	0.007222
	0.131642	0.013312	0.162556	0.008248
	0.131629	0.021971	0.161248	0.008025
	0.131512	0.021718	0.15948	0.007442
	0.129847	0.017555	0.158014	0.006756
	0.128322	0.010995	0.156826	0.005563
	0.129064	0.011712	0.155346	0.00512
	0.128312	0.010414	0.154095	0.005398
	0.127458	0.014132	0.153646	0.005606
	0.126558	0.020447	0.153348	0.007432
	0.126368	0.014946	0.15263	0.006625
	0.126929	0.014134	0.151041	0.006468
	0.126357	0.007082	0.149691	0.005877
	0.125703	0.007231	0.149106	0.005606
	0.124057	0.009647	0.148597	0.0049
	0.123297	0.017434	0.148031	0.007071
	0.123852	0.022506	0.147255	0.007577
	0.122909	0.014101	0.146005	0.006203
	0.122593	0.007709	0.144556	0.005648
	0.123042	0.008056	0.144058	0.005083
	0.12247	0.010407	0.142677	0.00608
	0.122515	0.020911	0.14147	0.007706
	0.121311	0.016579	0.140153	0.006562
	0.120982	0.011191	0.138715	0.00541
	0.120533	0.008431	0.137071	0.004516
	0.12105	0.012138	0.13568	0.005079
	0.121543	0.017957	0.134366	0.006131
	0.119969	0.011218	0.133471	0.0048
	0.119994	0.013593	0.132271	0.005136
	0.121379	0.018223	0.130516	0.006813
	0.120878	0.011565	0.129037	0.005321
	0.121037	0.008714	0.128274	0.004595
	0.120613	0.007644	0.127583	0.004938
	0.120679	0.010057	0.126463	0.004914
	0.120186	0.015718	0.124972	0.005664
	0.120039	0.014075	0.123772	0.004953
	0.120182	0.01075	0.122645	0.00464
	0.119513	0.008563	0.122066	0.005136
	0.119353	0.008956	0.121818	0.00476
	0.119358	0.011436	0.121392	0.004523
	0.118889	0.008864	0.120277	0.004484
	0.119235	0.01146	0.119614	0.005241
	0.119845	0.012595	0.118843	0.005208
	0.118945	0.007381	0.117917	0.003761
	0.118153	0.004929	0.117235	0.00339
	0.117728	0.005812	0.116819	0.003657
	0.116929	0.007773	0.116384	0.004225
	0.116436	0.012791	0.115808	0.005033
	0.115918	0.016462	0.114653	0.005524
	0.115637	0.010015	0.113989	0.004342
	0.114437	0.006178	0.113386	0.003918
	0.114914	0.008239	0.112309	0.004209
	0.116082	0.013103	0.110868	0.005012
	0.115845	0.008557	0.109581	0.004175
	0.116599	0.008689	0.109063	0.004405
	0.116701	0.008367	0.108723	0.004312
	0.116521	0.006382	0.108373	0.003635
	0.116809	0.007682	0.108164	0.003687
	0.116652	0.007533	0.10761	0.003849
	0.116777	0.007667	0.106559	0.003803
	0.116606	0.010535	0.105561	0.004411
	0.116341	0.011376	0.105099	0.004479
	0.115866	0.01493	0.103959	0.005271
	0.114227	0.006153	0.103083	0.003504
	0.11545	0.007284	0.102128	0.003719
	0.115689	0.005665	0.101233	0.003368
	0.115634	0.0058	0.100302	0.003189
	0.116474	0.007198	0.099669	0.00337
2	0.116978	0.007668	0.099033	0.003631
	0.117877	0.007919	0.098523	0.003549
	0.118445	0.009153	0.097432	0.003462
	0.11922	0.006396	0.096106	0.003248
	0.118739	0.006819	0.09499	0.003238
	0.117194	0.008011	0.093943	0.003377
	0.118186	0.009622	0.093475	0.00388
	0.117785	0.008061	0.093213	0.003597
	0.118724	0.00752	0.092643	0.003619
	0.119538	0.009675	0.092008	0.004006
	0.119324	0.01252	0.091133	0.004345
	0.119628	0.008327	0.090268	0.003419
	0.119708	0.009794	0.089773	0.00374
	0.119537	0.008333	0.089248	0.003283
	0.119135	0.007965	0.088487	0.003273
	0.118909	0.008271	0.088097	0.003556
	0.119358	0.010292	0.087833	0.004084
	0.118715	0.010056	0.087712	0.004134
	0.119461	0.012098	0.087317	0.004142
	0.120168	0.009346	0.086549	0.003434
	0.119884	0.006495	0.085938	0.002946
	0.119409	0.007101	0.085088	0.003137
	0.118594	0.010195	0.084171	0.003538
	0.118171	0.008315	0.083838	0.003416
	0.116908	0.007256	0.083659	0.003195
	0.116768	0.007966	0.083443	0.003364
	0.115927	0.008262	0.082833	0.003517
	0.114003	0.007296	0.082024	0.003439
	0.113405	0.008548	0.081128	0.003789
	0.112765	0.007146	0.080753	0.003104
	0.112501	0.006927	0.080157	0.003145
	0.11238	0.006804	0.07983	0.003216
	0.111811	0.005722	0.079222	0.002933
	0.111308	0.006442	0.078546	0.003081
	0.111351	0.005658	0.077852	0.002775
	0.111106	0.005711	0.077242	0.002811
	0.110042	0.005181	0.076656	0.00285
	0.108849	0.006568	0.075768	0.003367
	0.107725	0.005731	0.074751	0.003279
	0.106671	0.006938	0.074063	0.003121
	0.105306	0.006602	0.073665	0.002893
	0.103907	0.008112	0.072954	0.00326
	0.102931	0.01006	0.072385	0.003794
	0.10257	0.008889	0.072383	0.003437
	0.101458	0.008453	0.072064	0.003132
	0.100806	0.007209	0.071705	0.002936
	0.099327	0.006989	0.071406	0.002884
	0.099023	0.007461	0.071101	0.002956
	0.099181	0.006762	0.070565	0.002788
	0.099034	0.006961	0.069767	0.002916
	0.098725	0.007549	0.068772	0.003019
	0.098084	0.00752	0.068209	0.002864
	0.09788	0.005863	0.067839	0.002715
	0.096863	0.006045	0.067502	0.002885
	0.096449	0.005482	0.067284	0.002705
	0.095754	0.006009	0.067044	0.002762
	0.095765	0.005669	0.066844	0.002605
	0.096498	0.007304	0.066556	0.002916
	0.09685	0.008303	0.066353	0.003228
	0.0972	0.007122	0.066095	0.002924
	0.096953	0.006135	0.065849	0.002741
	0.096587	0.006753	0.065714	0.00291
	0.097481	0.009154	0.065727	0.003324
	0.097405	0.00427	0.065717	0.002176
	0.097296	0.005932	0.065315	0.002531
	0.097173	0.007651	0.064739	0.002872
	0.097461	0.008518	0.06428	0.003211
	0.098073	0.008376	0.063776	0.003402
	0.097851	0.006226	0.063515	0.003004
	0.097378	0.006659	0.063405	0.002944
	0.096449	0.006758	0.063166	0.003456
	0.095738	0.005676	0.062958	0.003129
	0.095297	0.008116	0.062727	0.003504
	0.094738	0.005484	0.062618	0.002979
	0.094954	0.006251	0.062698	0.002953
	0.094318	0.007032	0.062532	0.002985
	0.094467	0.006748	0.062107	0.00292
	0.094225	0.006993	0.061753	0.002807
	0.093288	0.007306	0.061268	0.002924
	0.092756	0.00502	0.060909	0.00277
	0.091972	0.005225	0.060685	0.002496
	0.091058	0.004707	0.05996	0.002685
	0.090482	0.004234	0.059338	0.002858
	0.088971	0.006631	0.058931	0.004282
	0.088135	0.008846	0.058522	0.00477
	0.087089	0.006978	0.058132	0.003061
	0.086414	0.00725	0.057883	0.002909
	0.085519	0.006855	0.057494	0.002833
	0.084632	0.00649	0.057196	0.002927
	0.084505	0.005191	0.057116	0.002617
	0.084471	0.005886	0.05691	0.002508
	0.084321	0.00539	0.056606	0.002461
	0.083942	0.004703	0.056203	0.002212
	0.083431	0.003586	0.055829	0.00209
	0.082572	0.004223	0.055095	0.002313
	0.082232	0.004411	0.054275	0.002594
	0.082135	0.006746	0.05381	0.002847
	0.081273	0.003944	0.053491	0.002171
	0.080865	0.003975	0.052888	0.002279
	0.081172	0.004585	0.052533	0.003058
	0.081503	0.005851	0.052166	0.003286
	0.081802	0.005641	0.051644	0.002774
	0.082039	0.004574	0.05138	0.002666
	0.082889	0.004017	0.051168	0.002376
	0.083504	0.005036	0.050767	0.002216
	0.083967	0.00631	0.050471	0.002465
	0.084261	0.004676	0.049801	0.002443
	0.08454	0.005294	0.049274	0.002727
	0.08501	0.00467	0.048914	0.002497
	0.084825	0.005847	0.048608	0.00262
	0.084468	0.007023	0.048103	0.002672
	0.083275	0.005691	0.047532	0.002493
	0.082579	0.004501	0.047038	0.002348
	0.082225	0.006131	0.046521	0.002718
	0.08202	0.00521	0.046243	0.002653
	0.081971	0.00589	0.045843	0.002603
	0.081514	0.003648	0.045469	0.002243
	0.08104	0.004177	0.044975	0.002486
	0.080762	0.005766	0.044595	0.002672
	0.080122	0.003301	0.044524	0.002044
	0.079381	0.005913	0.044282	0.002628
	0.078348	0.003237	0.043976	0.001852
	0.07756	0.004108	0.043755	0.002022
	0.077139	0.005526	0.043657	0.002452
	0.075995	0.005907	0.043448	0.002572
	0.075091	0.005354	0.043195	0.002374
	0.074056	0.004215	0.042952	0.002312
	0.07396	0.004892	0.043005	0.002398
	0.073836	0.004222	0.042933	0.002234
	0.072999	0.004804	0.042796	0.002396
	0.073069	0.005289	0.042666	0.002374
3	0.072633	0.004332	0.042412	0.002
	0.07279	0.003703	0.042221	0.001945
	0.072977	0.004652	0.042082	0.002213
	0.072714	0.004931	0.042127	0.002253
	0.072314	0.003998	0.041928	0.002184
	0.071521	0.004113	0.041863	0.002085
	0.071072	0.005668	0.041747	0.002549
	0.07059	0.006112	0.0418	0.002604
	0.070345	0.00392	0.041734	0.002188
	0.070485	0.003884	0.041529	0.002177
	0.070643	0.003643	0.041499	0.001958
	0.070678	0.006232	0.041547	0.002489
	0.071107	0.004054	0.041492	0.002085
	0.07118	0.003249	0.0412	0.001787
	0.070944	0.003714	0.040902	0.001935
	0.070771	0.004386	0.040697	0.002149
	0.070723	0.003985	0.040625	0.002114
	0.070528	0.003852	0.040541	0.002237
	0.070303	0.005347	0.040332	0.002552
	0.070466	0.004514	0.040104	0.002305
	0.070767	0.005115	0.039905	0.002482
	0.070488	0.003957	0.039788	0.002174
	0.070379	0.004033	0.039516	0.002264
	0.069888	0.003839	0.039344	0.002052
	0.069609	0.003693	0.039285	0.001968
	0.069426	0.003265	0.039077	0.001812
	0.069565	0.003185	0.038998	0.001882
	0.069781	0.003617	0.038942	0.002126
	0.069767	0.005801	0.038699	0.002414
	0.069557	0.00417	0.038539	0.002038
	0.069106	0.004777	0.038344	0.002331
	0.068143	0.00333	0.038173	0.002054
	0.067999	0.003518	0.037909	0.002011
	0.067381	0.004004	0.037703	0.002263
	0.066799	0.003017	0.037468	0.002224
	0.066514	0.003204	0.037265	0.002069
	0.066135	0.003368	0.036904	0.002035
	0.066132	0.004061	0.036458	0.002075
	0.065454	0.005095	0.036146	0.002228
	0.064465	0.006207	0.036115	0.002498
	0.063879	0.004545	0.036113	0.002146
	0.063118	0.004586	0.035947	0.002126
	0.062949	0.004475	0.035716	0.002384
	0.062639	0.003735	0.035574	0.002086
	0.062814	0.003603	0.035445	0.001997
	0.062759	0.003317	0.035139	0.001914
	0.062693	0.004138	0.035037	0.00188
	0.06243	0.005983	0.035155	0.002303
	0.061875	0.003766	0.035318	0.002103
	0.062003	0.003863	0.035452	0.002439
	0.061739	0.004249	0.035358	0.002203
	0.061354	0.003934	0.035129	0.002123
	0.061092	0.004825	0.034985	0.002197
	0.060498	0.00416	0.034788	0.001853
	0.06006	0.005167	0.034624	0.002115
	0.059948	0.003704	0.034601	0.001887
	0.05998	0.004314	0.034507	0.002325
	0.059884	0.00318	0.034524	0.003577
	0.059195	0.003558	0.034602	0.003887
	0.058758	0.004124	0.034697	0.0026
	0.058572	0.003334	0.034605	0.001909
	0.058451	0.005068	0.034357	0.002168
	0.058063	0.004488	0.034207	0.002014
	0.057862	0.002847	0.034044	0.001787
	0.057892	0.003233	0.034016	0.001863
	0.057537	0.00435	0.033891	0.002039
	0.057355	0.004125	0.03375	0.002106
	0.057094	0.003776	0.033438	0.001997
	0.057128	0.003189	0.032979	0.001979
	0.057004	0.003262	0.032496	0.002098
	0.056547	0.004516	0.032139	0.002206
	0.056468	0.005106	0.03184	0.002
	0.05643	0.004444	0.03172	0.001912
	0.056372	0.004174	0.031528	0.002113
	0.056751	0.004775	0.031311	0.002139
	0.056695	0.004919	0.031079	0.002054
	0.056694	0.00361	0.030788	0.001706
	0.056582	0.00291	0.030634	0.001593
	0.056655	0.003708	0.030559	0.001827
	0.056873	0.004233	0.030327	0.001948
	0.056922	0.005157	0.029848	0.0022
	0.056907	0.004273	0.029657	0.002032
	0.056924	0.004246	0.029784	0.001999
	0.057044	0.004782	0.030122	0.00212
	0.057137	0.005463	0.030236	0.002234
	0.056903	0.003783	0.030176	0.001809
	0.056923	0.004185	0.03018	0.002
	0.05693	0.003597	0.030117	0.001923
	0.056787	0.003423	0.030035	0.002022
	0.056277	0.003669	0.029847	0.002045
	0.056213	0.004365	0.029733	0.002044
	0.056437	0.003917	0.029919	0.002235
	0.056311	0.003889	0.030285	0.00286
	0.056548	0.004124	0.030453	0.003175
	0.057019	0.005424	0.030477	0.002729
	0.05644	0.002832	0.030606	0.001986
	0.056446	0.002866	0.030796	0.002006
	0.056345	0.002889	0.030939	0.001872
	0.056274	0.003583	0.030817	0.001972
	0.056045	0.003147	0.030604	0.001786
	0.055768	0.002763	0.03048	0.002061
	0.0559	0.00353	0.030551	0.002927
	0.055955	0.003735	0.030385	0.002977
	0.055581	0.00572	0.030019	0.002528
	0.055341	0.00545	0.029509	0.002321
	0.055479	0.004415	0.029243	0.002088
	0.055605	0.003579	0.029036	0.001997
	0.055437	0.002985	0.028919	0.001951
	0.055621	0.00424	0.028841	0.002089
	0.055896	0.005137	0.028924	0.002272
	0.056372	0.00382	0.028914	0.002064
	0.056455	0.003349	0.028767	0.002057
	0.056222	0.004038	0.028307	0.002157
	0.056293	0.00494	0.02783	0.002294
	0.055911	0.004343	0.027723	0.002075
	0.055399	0.005384	0.027905	0.002271
	0.055142	0.004564	0.027847	0.002241
	0.054769	0.006545	0.027559	0.002527
	0.054533	0.004373	0.027345	0.002003
	0.054376	0.003867	0.027337	0.001961
	0.054299	0.003282	0.027276	0.001914
	0.054275	0.003585	0.027118	0.001925
	0.054063	0.006082	0.027011	0.002364
	0.053844	0.005408	0.026949	0.002165
	0.053925	0.004146	0.026874	0.002072
	0.053895	0.00564	0.026854	0.002573
	0.05329	0.003799	0.026793	0.002003
	0.05291	0.003618	0.0267	0.001703
	0.05299	0.004316	0.026474	0.001888
	0.05272	0.003429	0.026363	0.001754
	0.052432	0.003333	0.026378	0.001743
4	0.052092	0.003916	0.02638	0.001832

## Sheet: 4B - Power Spectra 0-4Hz - Odor
Time	Non Pressers - Odor	Non Pressers - Odor	Pressers - Odor	Pressers - Odor
	Time course	SEM	Time course	SEM
0	0.011231	0.000622	0.028039	0.00052
	0.01242	0.001163	0.033408	0.001282
	0.014187	0.001185	0.03904	0.001491
	0.016018	0.001371	0.044415	0.001433
	0.017613	0.001792	0.04999	0.001555
	0.018626	0.002492	0.056066	0.002099
	0.019879	0.003397	0.061308	0.003056
	0.021057	0.004493	0.066757	0.005238
	0.022227	0.00579	0.073131	0.006541
	0.023373	0.006562	0.080065	0.007935
	0.024657	0.007177	0.086143	0.00956
	0.027497	0.007624	0.095982	0.009712
	0.030342	0.008802	0.106608	0.010583
	0.033302	0.009549	0.117894	0.010238
	0.036813	0.009271	0.129856	0.011883
	0.041222	0.009791	0.141544	0.012982
	0.045926	0.011178	0.153636	0.012827
	0.049646	0.011849	0.164719	0.014817
	0.052411	0.010871	0.176397	0.016588
	0.054804	0.011312	0.187604	0.018452
	0.057893	0.011814	0.198415	0.018432
	0.060903	0.013408	0.209869	0.017228
	0.063972	0.012695	0.222541	0.01632
	0.067104	0.013241	0.232781	0.017803
	0.0702	0.015734	0.242988	0.019364
	0.073421	0.018647	0.252026	0.019585
	0.077301	0.020038	0.261845	0.019172
	0.081871	0.014016	0.271539	0.018568
	0.08745	0.012235	0.279966	0.022128
	0.091971	0.013182	0.288936	0.023967
	0.095689	0.016106	0.295513	0.022987
	0.098032	0.015937	0.302153	0.022853
	0.10034	0.016207	0.308341	0.02678
	0.103101	0.019279	0.315757	0.02328
	0.105951	0.014396	0.323509	0.022273
	0.109247	0.019395	0.329818	0.020413
	0.110625	0.029488	0.336534	0.023117
	0.11166	0.029881	0.342381	0.023884
	0.114582	0.03412	0.349565	0.023712
	0.119477	0.02404	0.35663	0.026586
	0.124084	0.021851	0.363316	0.023181
	0.127609	0.02094	0.37118	0.023612
	0.130598	0.020902	0.374993	0.022452
	0.132472	0.019968	0.375748	0.023956
	0.133255	0.026802	0.380185	0.024555
	0.133413	0.032485	0.384213	0.023129
	0.134506	0.02411	0.388189	0.025115
	0.137883	0.021954	0.391442	0.025854
	0.138817	0.034481	0.39552	0.025433
	0.138091	0.043057	0.398159	0.026968
	0.139389	0.042734	0.398102	0.026859
	0.142996	0.035208	0.400316	0.027524
	0.146289	0.031864	0.403577	0.02419
	0.148002	0.029595	0.407592	0.024884
	0.148363	0.03351	0.407591	0.029339
	0.148196	0.030476	0.405577	0.028901
	0.147419	0.031085	0.403616	0.026979
	0.147293	0.049105	0.4034	0.028461
	0.147174	0.047955	0.403898	0.029185
	0.148524	0.035784	0.40471	0.02655
	0.149006	0.036303	0.403482	0.026563
	0.148874	0.051023	0.405005	0.026771
	0.147437	0.047044	0.406317	0.027029
	0.14669	0.042843	0.408868	0.026108
	0.147558	0.043263	0.410716	0.025632
	0.149379	0.037779	0.410452	0.026072
	0.150223	0.038319	0.412033	0.0248
	0.150105	0.035471	0.416298	0.026149
	0.147324	0.039574	0.41814	0.024302
	0.147239	0.043069	0.417013	0.024011
	0.148249	0.037155	0.416585	0.023485
	0.148272	0.032742	0.417615	0.028995
	0.145759	0.027527	0.416954	0.029566
	0.144709	0.03019	0.414916	0.028055
	0.144319	0.029803	0.412309	0.027555
	0.143866	0.028097	0.413383	0.026386
	0.144333	0.025766	0.41435	0.029951
	0.145491	0.028708	0.416308	0.031085
	0.148528	0.024009	0.415337	0.032915
	0.150265	0.028092	0.412916	0.027926
	0.148073	0.030941	0.410735	0.025943
	0.146536	0.029524	0.410108	0.025768
	0.14735	0.02045	0.406674	0.026178
	0.14921	0.01882	0.401357	0.023468
	0.148504	0.028061	0.397393	0.023162
	0.147554	0.027376	0.394461	0.025747
	0.147863	0.023488	0.391482	0.025705
	0.149332	0.035389	0.386268	0.026181
	0.150825	0.036404	0.378333	0.025226
	0.154729	0.026226	0.372433	0.021989
	0.157727	0.018773	0.368979	0.021948
	0.159324	0.027792	0.366457	0.025168
	0.159344	0.034836	0.362504	0.024415
	0.161392	0.026694	0.360511	0.024675
	0.163226	0.02049	0.359138	0.025567
	0.166002	0.027232	0.355332	0.022261
	0.168637	0.029669	0.350746	0.021283
	0.171015	0.020626	0.346404	0.021644
	0.172264	0.02078	0.341552	0.023094
	0.170733	0.037637	0.338164	0.021757
	0.169897	0.044521	0.336986	0.02141
	0.172151	0.038789	0.333919	0.019886
	0.174201	0.024258	0.328466	0.018771
	0.175265	0.031726	0.32337	0.022012
	0.176729	0.027558	0.319845	0.021912
	0.180916	0.032666	0.31579	0.019317
	0.182117	0.022105	0.31198	0.018093
	0.180891	0.026774	0.310909	0.017891
	0.180901	0.031371	0.308532	0.017507
	0.18149	0.02453	0.307557	0.016622
	0.179365	0.020313	0.306362	0.02021
	0.175699	0.024179	0.30381	0.01819
	0.173457	0.025694	0.301577	0.017857
	0.172236	0.031664	0.300065	0.018179
	0.169941	0.033829	0.296821	0.016032
	0.167594	0.029496	0.293258	0.016806
	0.165082	0.021715	0.292331	0.014938
	0.163887	0.027883	0.289563	0.023047
	0.162681	0.024606	0.288349	0.017881
	0.160123	0.025188	0.288285	0.017015
	0.160564	0.028211	0.285615	0.018208
	0.162085	0.023471	0.281225	0.015526
	0.163255	0.022214	0.277588	0.015974
	0.163638	0.020857	0.275882	0.015109
	0.160332	0.026243	0.275044	0.015954
	0.156708	0.026906	0.273915	0.015452
	0.153931	0.02731	0.272843	0.015118
	0.154122	0.0235	0.272592	0.013416
	0.154689	0.021289	0.26853	0.018108
	0.155512	0.01729	0.266524	0.016548
	0.154853	0.020702	0.265044	0.012983
	0.154271	0.021508	0.263183	0.014023
1	0.152876	0.032216	0.261586	0.014668
	0.151508	0.033517	0.260786	0.014891
	0.15359	0.018805	0.2593	0.014679
	0.157155	0.021797	0.258287	0.014713
	0.160899	0.023607	0.256679	0.013687
	0.162522	0.02351	0.254355	0.014917
	0.162167	0.017292	0.253404	0.011893
	0.161182	0.02194	0.251909	0.013373
	0.161572	0.021074	0.248881	0.01489
	0.160633	0.02215	0.247555	0.015591
	0.159586	0.021628	0.246554	0.014589
	0.157501	0.01925	0.245779	0.014764
	0.156153	0.022564	0.245712	0.012434
	0.157314	0.035578	0.245016	0.013397
	0.158825	0.030529	0.242554	0.01327
	0.160878	0.021299	0.240002	0.012082
	0.163068	0.019437	0.237453	0.013053
	0.165253	0.016068	0.236712	0.012126
	0.163314	0.018452	0.236122	0.011788
	0.160919	0.017678	0.23316	0.011493
	0.159927	0.019504	0.231151	0.012384
	0.161721	0.029549	0.230622	0.011574
	0.163527	0.021071	0.228708	0.011738
	0.162094	0.016908	0.226585	0.012462
	0.159139	0.016863	0.223959	0.014613
	0.156807	0.020225	0.221521	0.012331
	0.155469	0.032562	0.219634	0.012542
	0.153845	0.0332	0.216841	0.012569
	0.15407	0.019406	0.214154	0.012516
	0.156219	0.015404	0.21282	0.011204
	0.157914	0.018684	0.21126	0.011826
	0.159656	0.01776	0.20952	0.012426
	0.159234	0.019153	0.207325	0.011742
	0.158501	0.02161	0.203841	0.011985
	0.158266	0.021169	0.199064	0.013154
	0.158862	0.018891	0.195886	0.010037
	0.157493	0.021892	0.193506	0.01102
	0.154769	0.023052	0.191428	0.011477
	0.151635	0.014778	0.188811	0.009632
	0.151686	0.0251	0.186115	0.011448
	0.152492	0.027672	0.184147	0.010762
	0.154323	0.026595	0.181257	0.010051
	0.157474	0.014786	0.177168	0.009189
	0.162596	0.018912	0.173783	0.008772
	0.16534	0.014308	0.171897	0.009405
	0.166879	0.022873	0.170727	0.010239
	0.165504	0.023548	0.169833	0.009512
	0.166852	0.016952	0.168721	0.011333
	0.170308	0.013062	0.1686	0.009729
	0.17171	0.013712	0.167807	0.01032
	0.170607	0.011143	0.166271	0.008228
	0.168843	0.024308	0.165483	0.009762
	0.165783	0.036838	0.164779	0.011296
	0.165096	0.060228	0.163388	0.013993
	0.165385	0.036382	0.162849	0.010125
	0.167788	0.022914	0.162457	0.009371
	0.168731	0.013946	0.161831	0.008965
	0.170716	0.023292	0.161069	0.009076
	0.172531	0.020291	0.159568	0.009096
	0.173862	0.022028	0.157656	0.008964
	0.175166	0.020023	0.155628	0.008751
	0.177342	0.018613	0.153623	0.009414
	0.178587	0.011072	0.151964	0.008581
	0.176887	0.015503	0.151058	0.008375
	0.171978	0.023065	0.150369	0.010589
	0.167372	0.040624	0.149129	0.010861
	0.164652	0.040684	0.147617	0.010137
	0.165408	0.03191	0.146346	0.009367
	0.164653	0.019181	0.144814	0.0075
	0.164734	0.016244	0.143117	0.00684
	0.165079	0.018153	0.142015	0.006447
	0.163362	0.024719	0.140797	0.007423
	0.162203	0.036093	0.139158	0.009504
	0.162462	0.02726	0.138313	0.008389
	0.164871	0.019016	0.138843	0.007982
	0.164683	0.01007	0.138624	0.007093
	0.1615	0.009401	0.138728	0.006863
	0.157996	0.016179	0.138082	0.006221
	0.153866	0.027925	0.137117	0.00832
	0.150525	0.029184	0.136672	0.0102
	0.14975	0.025358	0.13674	0.00744
	0.149356	0.011835	0.136804	0.005224
	0.149555	0.013126	0.136835	0.005111
	0.1476	0.018655	0.136159	0.006851
	0.145691	0.037553	0.135422	0.010062
	0.143751	0.030626	0.13426	0.008662
	0.144707	0.020139	0.132885	0.006693
	0.146173	0.014153	0.131931	0.005407
	0.146406	0.018526	0.130519	0.00634
	0.145282	0.014966	0.129417	0.008092
	0.142563	0.015624	0.12858	0.006273
	0.140096	0.023403	0.127724	0.006749
	0.140036	0.029482	0.126453	0.009072
	0.140043	0.021318	0.125166	0.006348
	0.140757	0.015543	0.123053	0.005724
	0.138693	0.013409	0.120704	0.005336
	0.136633	0.018536	0.118748	0.005769
	0.135588	0.029401	0.117226	0.007595
	0.135338	0.026732	0.116012	0.006588
	0.136835	0.019467	0.115408	0.006027
	0.138415	0.014333	0.114861	0.00587
	0.139737	0.014712	0.114293	0.006186
	0.138647	0.01009	0.11338	0.006103
	0.136031	0.016887	0.113124	0.005724
	0.134302	0.020607	0.112809	0.00606
	0.133369	0.023214	0.112565	0.006112
	0.133834	0.011623	0.11291	0.00486
	0.133932	0.006834	0.113274	0.004267
	0.132881	0.00847	0.112924	0.004498
	0.130998	0.013993	0.112871	0.005013
	0.129023	0.024212	0.112659	0.006367
	0.128105	0.030342	0.112268	0.007522
	0.128203	0.018432	0.111477	0.005601
	0.129196	0.010383	0.11062	0.005186
	0.130307	0.009627	0.110354	0.005589
	0.129159	0.010699	0.110479	0.006721
	0.127078	0.013363	0.109917	0.005197
	0.125927	0.013641	0.1094	0.005727
	0.125199	0.012243	0.109206	0.005458
	0.124825	0.009372	0.108842	0.004492
	0.122249	0.009457	0.107874	0.004481
	0.120576	0.011124	0.10681	0.005004
	0.117587	0.01305	0.105436	0.004586
	0.116173	0.018943	0.104059	0.005139
	0.114752	0.021027	0.102624	0.005928
	0.114236	0.013091	0.101395	0.00688
	0.114087	0.009509	0.099982	0.003857
	0.113737	0.00832	0.098428	0.004254
	0.112858	0.007685	0.09729	0.003906
	0.111184	0.009694	0.096426	0.003863
	0.110921	0.009576	0.095313	0.004182
2	0.111987	0.011036	0.094622	0.004389
	0.112247	0.012425	0.093142	0.004443
	0.111517	0.012596	0.091443	0.004338
	0.109466	0.00937	0.090589	0.003734
	0.106727	0.007468	0.089309	0.004052
	0.105152	0.013778	0.088088	0.004427
	0.104997	0.014794	0.087658	0.004959
	0.10527	0.010849	0.086696	0.004248
	0.105883	0.009794	0.085554	0.004282
	0.106724	0.008469	0.084897	0.005025
	0.10777	0.011561	0.084029	0.005848
	0.10756	0.010893	0.08307	0.004453
	0.108396	0.009564	0.082386	0.004944
	0.109824	0.009859	0.082142	0.004248
	0.111009	0.011124	0.081742	0.004297
	0.111331	0.009978	0.081226	0.00446
	0.110815	0.007768	0.080643	0.005102
	0.109784	0.007152	0.079969	0.005231
	0.109662	0.015321	0.079124	0.005677
	0.110023	0.011339	0.078029	0.004612
	0.109641	0.009033	0.077084	0.00389
	0.109108	0.008981	0.076063	0.00415
	0.109054	0.010684	0.075478	0.004837
	0.109279	0.013149	0.075758	0.00457
	0.10984	0.010164	0.075464	0.004305
	0.110425	0.008501	0.075437	0.004364
	0.110986	0.009413	0.074914	0.004578
	0.111393	0.008268	0.073996	0.004062
	0.111091	0.011018	0.073709	0.004628
	0.109441	0.008252	0.073539	0.004059
	0.107516	0.005969	0.072968	0.003996
	0.106745	0.006225	0.072433	0.004093
	0.10754	0.00793	0.071879	0.003512
	0.107094	0.01039	0.071693	0.003804
	0.105202	0.009509	0.070952	0.003393
	0.104638	0.006803	0.07018	0.00332
	0.10415	0.007709	0.069604	0.003123
	0.103803	0.011024	0.069395	0.003862
	0.10402	0.008919	0.069113	0.003735
	0.103936	0.008708	0.068364	0.003523
	0.104128	0.008832	0.067949	0.003516
	0.103829	0.010965	0.068045	0.004292
	0.102879	0.009839	0.06821	0.004969
	0.101897	0.009292	0.068186	0.004507
	0.100603	0.00773	0.067751	0.004171
	0.099821	0.010413	0.067349	0.003747
	0.098744	0.011924	0.066539	0.003562
	0.097376	0.011167	0.066185	0.003917
	0.095613	0.011088	0.066257	0.003679
	0.094557	0.011576	0.06586	0.00372
	0.094339	0.013297	0.065214	0.003812
	0.094395	0.01331	0.064978	0.003691
	0.093391	0.008991	0.065179	0.003402
	0.090687	0.007587	0.06518	0.003542
	0.088384	0.00694	0.064907	0.003189
	0.087396	0.008936	0.064841	0.003317
	0.086141	0.008485	0.064566	0.002985
	0.085362	0.010128	0.064257	0.00368
	0.085512	0.00906	0.063711	0.004226
	0.084996	0.009016	0.063155	0.003853
	0.083419	0.006457	0.06282	0.003456
	0.081571	0.007578	0.062451	0.003757
	0.080918	0.007574	0.062074	0.004444
	0.080936	0.005403	0.061386	0.002636
	0.080681	0.006411	0.060728	0.003281
	0.079285	0.008016	0.060302	0.003822
	0.077981	0.008385	0.060323	0.004374
	0.077375	0.010096	0.060604	0.004571
	0.077215	0.008701	0.060515	0.003784
	0.077542	0.010584	0.059848	0.003822
	0.078279	0.01084	0.059547	0.003832
	0.07886	0.00886	0.059427	0.003261
	0.078771	0.007719	0.059325	0.004299
	0.078428	0.006364	0.058953	0.003581
	0.078547	0.007182	0.058868	0.0036
	0.07933	0.006352	0.058581	0.003536
	0.079635	0.006046	0.058202	0.003689
	0.079485	0.005021	0.057989	0.003674
	0.078516	0.010166	0.05803	0.003571
	0.076994	0.006428	0.058006	0.003232
	0.075894	0.007994	0.057828	0.003199
	0.075606	0.00692	0.058044	0.003497
	0.0755	0.00526	0.058129	0.003184
	0.07474	0.006767	0.058012	0.003717
	0.074447	0.007961	0.05816	0.00427
	0.074245	0.007491	0.058257	0.003644
	0.074564	0.007006	0.05814	0.003899
	0.074603	0.007616	0.057751	0.003802
	0.074797	0.006245	0.057263	0.003972
	0.075219	0.006055	0.05691	0.00338
	0.075433	0.010108	0.056535	0.003384
	0.075232	0.008316	0.056202	0.003158
	0.074411	0.007225	0.056106	0.002851
	0.073871	0.004507	0.05577	0.002473
	0.073683	0.006166	0.055324	0.002861
	0.073499	0.006647	0.05478	0.002997
	0.072837	0.007616	0.054526	0.003483
	0.072821	0.005592	0.054362	0.002637
	0.073427	0.004729	0.053873	0.002656
	0.073764	0.006019	0.053185	0.003139
	0.07326	0.00776	0.052819	0.003517
	0.072869	0.008301	0.052301	0.003298
	0.073244	0.005768	0.051497	0.003479
	0.073155	0.005386	0.051104	0.002989
	0.072997	0.006781	0.050551	0.002915
	0.072393	0.008869	0.050134	0.003315
	0.071864	0.004897	0.049821	0.003036
	0.071996	0.007958	0.049374	0.003498
	0.072387	0.006432	0.048851	0.003237
	0.072601	0.005442	0.048452	0.003482
	0.072295	0.00467	0.04829	0.003619
	0.071302	0.007454	0.048043	0.003313
	0.070793	0.007434	0.047603	0.003118
	0.071185	0.007087	0.046974	0.003518
	0.071821	0.004529	0.046444	0.003291
	0.07216	0.004978	0.04613	0.00341
	0.072449	0.004743	0.045776	0.002928
	0.072428	0.005714	0.04515	0.003293
	0.072171	0.00642	0.0444	0.003432
	0.071697	0.004924	0.043886	0.002645
	0.071327	0.004998	0.043632	0.003385
	0.071314	0.003656	0.04322	0.002145
	0.071204	0.006042	0.043021	0.002643
	0.070906	0.008994	0.042743	0.003275
	0.071526	0.009395	0.042191	0.003473
	0.0717	0.006994	0.0418	0.003161
	0.071411	0.0067	0.041454	0.002994
	0.071569	0.007639	0.041093	0.003221
	0.071741	0.006847	0.040862	0.002976
	0.071707	0.007864	0.040797	0.003233
	0.071739	0.008356	0.040603	0.00319
3	0.071119	0.004691	0.04	0.002684
	0.0722	0.00468	0.039823	0.002516
	0.07213	0.007033	0.039643	0.002899
	0.071291	0.006973	0.039392	0.003037
	0.070709	0.00524	0.039184	0.002647
	0.0712	0.005526	0.038853	0.002532
	0.071024	0.008131	0.038493	0.003296
	0.070849	0.005349	0.038243	0.003495
	0.071519	0.005221	0.038334	0.002874
	0.071404	0.005869	0.038347	0.002841
	0.07191	0.003923	0.038208	0.002583
	0.072705	0.010479	0.038199	0.003313
	0.073335	0.005215	0.038028	0.002676
	0.072788	0.003981	0.037982	0.002317
	0.071277	0.005541	0.038014	0.002479
	0.070146	0.007322	0.038068	0.002749
	0.069713	0.00609	0.038008	0.002603
	0.069011	0.006484	0.03784	0.002645
	0.068673	0.008569	0.037617	0.003298
	0.068374	0.005497	0.037223	0.003028
	0.068028	0.004208	0.036803	0.003297
	0.068129	0.003818	0.03667	0.002854
	0.067353	0.004442	0.036353	0.002979
	0.067076	0.004562	0.035935	0.002702
	0.067292	0.005768	0.035595	0.002498
	0.067214	0.004399	0.035384	0.002232
	0.066143	0.004685	0.03536	0.002361
	0.065606	0.003308	0.035179	0.002459
	0.066187	0.004163	0.035071	0.00316
	0.06618	0.006094	0.03489	0.002695
	0.065762	0.003822	0.034821	0.003077
	0.06515	0.002758	0.034769	0.002667
	0.065121	0.005693	0.034565	0.002634
	0.064326	0.006231	0.034439	0.002628
	0.063855	0.003857	0.034426	0.002428
	0.063635	0.004543	0.034399	0.002568
	0.064346	0.005197	0.034165	0.00258
	0.064701	0.005394	0.033969	0.002676
	0.064455	0.008198	0.033825	0.002944
	0.064126	0.010559	0.033562	0.003361
	0.064113	0.006775	0.033604	0.002775
	0.06399	0.007	0.033874	0.002676
	0.063757	0.006599	0.033987	0.002943
	0.063028	0.00521	0.033952	0.002605
	0.062834	0.005065	0.033984	0.002431
	0.063142	0.004805	0.033964	0.002369
	0.063562	0.005133	0.033726	0.002389
	0.063956	0.006345	0.033628	0.003044
	0.06363	0.005242	0.033627	0.00237
	0.062705	0.005049	0.033524	0.002323
	0.061443	0.006547	0.033433	0.002613
	0.061326	0.006099	0.033395	0.002593
	0.061017	0.007481	0.033239	0.002753
	0.059964	0.005539	0.033137	0.00241
	0.059664	0.007257	0.032962	0.00278
	0.059776	0.005661	0.032703	0.002429
	0.060026	0.007405	0.032488	0.002702
	0.060036	0.0054	0.032363	0.002411
	0.059894	0.004215	0.032345	0.002304
	0.060391	0.004641	0.032286	0.00261
	0.060351	0.004643	0.0324	0.002416
	0.05957	0.009132	0.032213	0.002845
	0.058834	0.007629	0.031836	0.002567
	0.058406	0.003874	0.031507	0.00221
	0.058442	0.004851	0.031389	0.002234
	0.058154	0.007335	0.031184	0.002571
	0.05702	0.006163	0.031029	0.002702
	0.055586	0.005693	0.030994	0.002478
	0.054904	0.004494	0.030881	0.002322
	0.055134	0.004578	0.030836	0.002181
	0.055692	0.006748	0.030669	0.00238
	0.056032	0.00482	0.030537	0.002496
	0.056259	0.004149	0.030333	0.002393
	0.056794	0.004202	0.030135	0.002379
	0.057096	0.005255	0.029976	0.002735
	0.05705	0.007447	0.029939	0.002741
	0.057226	0.004759	0.029969	0.002258
	0.057485	0.00372	0.029789	0.002071
	0.057346	0.005777	0.029722	0.002413
	0.057434	0.007378	0.029604	0.002486
	0.057399	0.009226	0.029405	0.002906
	0.057097	0.006067	0.029389	0.002702
	0.057006	0.005782	0.029492	0.002627
	0.057555	0.007772	0.029405	0.002802
	0.058351	0.006627	0.029287	0.002955
	0.058456	0.005159	0.029309	0.002317
	0.05829	0.00627	0.029478	0.002533
	0.058696	0.005071	0.029347	0.002365
	0.059541	0.004457	0.029194	0.002435
	0.059692	0.005888	0.029051	0.002529
	0.059883	0.00628	0.028903	0.002557
	0.059738	0.005414	0.028825	0.00239
	0.05919	0.004834	0.028637	0.002404
	0.058949	0.005372	0.028536	0.002506
	0.058154	0.007781	0.028416	0.002983
	0.058008	0.004026	0.028347	0.002465
	0.057788	0.003964	0.028321	0.002351
	0.057206	0.004843	0.028072	0.002284
	0.057207	0.005849	0.028032	0.002604
	0.057456	0.004397	0.02806	0.00228
	0.057091	0.003579	0.027984	0.002339
	0.056742	0.003567	0.027995	0.002649
	0.057135	0.004828	0.02776	0.002498
	0.057587	0.008702	0.027674	0.003083
	0.057614	0.007464	0.027827	0.003058
	0.057221	0.006771	0.028016	0.002694
	0.057543	0.004354	0.028012	0.002392
	0.057884	0.003236	0.027851	0.002343
	0.05753	0.005344	0.027793	0.002628
	0.056939	0.008205	0.027825	0.002976
	0.056627	0.006226	0.027972	0.002582
	0.056059	0.004376	0.028107	0.002387
	0.056366	0.005942	0.028218	0.002547
	0.056557	0.008138	0.028252	0.002827
	0.055745	0.006294	0.028291	0.002654
	0.055839	0.004651	0.028323	0.002973
	0.056005	0.006712	0.028197	0.002773
	0.056302	0.011459	0.027983	0.003108
	0.056767	0.004702	0.027971	0.002538
	0.056233	0.00412	0.02788	0.002422
	0.05554	0.003726	0.027754	0.002393
	0.055421	0.003899	0.027665	0.002505
	0.054743	0.010018	0.027444	0.003145
	0.053913	0.007281	0.027301	0.002847
	0.052998	0.005639	0.027044	0.002443
	0.052289	0.009985	0.026718	0.002799
	0.05207	0.005702	0.026423	0.002305
	0.051771	0.004535	0.026178	0.00219
	0.05152	0.006764	0.026091	0.002438
	0.05185	0.005013	0.026135	0.002207
	0.051936	0.005007	0.026165	0.002165
4	0.051447	0.005622	0.026145	0.002306

## Sheet: 4B - Power Spectra 0-4Hz - Rewa
Time	Non Pressers - reward	Non Pressers - reward	Pressers - reward	Pressers - reward
	Time course	SEM	Time course	SEM
0	0.013199	7.05e-05	0.019536	0.000647
	0.01532	0.000165	0.023205	0.001714
	0.017608	0.000396	0.027127	0.002029
	0.02003	0.000909	0.031065	0.001869
	0.022147	0.001917	0.035066	0.001826
	0.024608	0.003171	0.039457	0.002146
	0.027201	0.004711	0.044402	0.003139
	0.029697	0.00687	0.049418	0.004342
	0.031879	0.009338	0.054444	0.005398
	0.034007	0.010986	0.059773	0.006653
	0.036292	0.012013	0.06521	0.007702
	0.040561	0.013309	0.072857	0.007967
	0.04466	0.015162	0.080974	0.008304
	0.048564	0.015732	0.090437	0.008576
	0.052553	0.015435	0.100544	0.009036
	0.056728	0.016761	0.110838	0.01067
	0.060923	0.018496	0.12113	0.011735
	0.06493	0.018417	0.132076	0.012988
	0.068911	0.01782	0.143215	0.013924
	0.072359	0.018536	0.154724	0.015208
	0.075936	0.020184	0.166182	0.0158
	0.079889	0.022403	0.176992	0.014753
	0.083586	0.021179	0.18761	0.015261
	0.087571	0.021897	0.197871	0.017728
	0.090625	0.020726	0.207772	0.019009
	0.094403	0.020255	0.2176	0.019959
	0.09849	0.021112	0.227294	0.02007
	0.101954	0.019802	0.235544	0.020946
	0.10479	0.020862	0.243552	0.021545
	0.107193	0.017545	0.252328	0.022993
	0.110246	0.022115	0.260493	0.023944
	0.113819	0.025781	0.268507	0.022704
	0.116937	0.024416	0.277165	0.022743
	0.12002	0.030782	0.285678	0.022734
	0.124379	0.021518	0.292904	0.022117
	0.128722	0.031438	0.300301	0.022559
	0.132087	0.046442	0.306954	0.022972
	0.135046	0.039171	0.312978	0.025398
	0.139643	0.029971	0.318606	0.023522
	0.143295	0.024388	0.325678	0.024591
	0.146789	0.03026	0.332362	0.024364
	0.150839	0.035866	0.337497	0.02561
	0.154392	0.034301	0.343907	0.025134
	0.158148	0.031898	0.351485	0.024206
	0.162107	0.0424	0.360135	0.023605
	0.165809	0.045894	0.368609	0.024571
	0.168665	0.036315	0.374842	0.02472
	0.171601	0.034971	0.380993	0.025963
	0.176077	0.058397	0.388555	0.026892
	0.179784	0.045401	0.395559	0.029353
	0.184192	0.04032	0.401783	0.029847
	0.188451	0.051057	0.407062	0.029548
	0.190887	0.051299	0.411649	0.028685
	0.194708	0.05218	0.415509	0.031278
	0.199293	0.059924	0.419797	0.035989
	0.201677	0.054063	0.423123	0.034186
	0.2039	0.053318	0.426733	0.0312
	0.206103	0.057445	0.430971	0.033847
	0.209692	0.07485	0.433845	0.0342
	0.210864	0.056922	0.435357	0.032267
	0.212344	0.061273	0.434283	0.032986
	0.214156	0.068711	0.43409	0.031874
	0.214533	0.065904	0.436422	0.031277
	0.215098	0.073399	0.438472	0.030376
	0.215513	0.077872	0.438415	0.031715
	0.214266	0.069265	0.436548	0.030556
	0.213854	0.069873	0.436701	0.03124
	0.21453	0.063247	0.43825	0.031213
	0.213855	0.071216	0.438003	0.027652
	0.212133	0.062023	0.437149	0.026779
	0.211912	0.055078	0.437125	0.025273
	0.211224	0.053674	0.435948	0.028685
	0.209034	0.047386	0.436727	0.028811
	0.207097	0.049631	0.436141	0.032338
	0.20527	0.048557	0.435712	0.031919
	0.202725	0.038712	0.434866	0.029445
	0.200848	0.039348	0.434448	0.032838
	0.199222	0.050466	0.432165	0.03223
	0.197283	0.041674	0.430632	0.030432
	0.193574	0.044731	0.429422	0.030988
	0.190526	0.049121	0.429449	0.031775
	0.188277	0.04915	0.43176	0.03011
	0.186859	0.032237	0.432496	0.033461
	0.186589	0.025109	0.431265	0.029842
	0.185751	0.04764	0.429663	0.028573
	0.185682	0.047996	0.427402	0.029754
	0.186473	0.040545	0.425412	0.028595
	0.186775	0.053446	0.422717	0.027118
	0.185729	0.033096	0.419739	0.03196
	0.18563	0.026232	0.417907	0.02731
	0.184744	0.026788	0.414708	0.027165
	0.183594	0.030624	0.410884	0.03013
	0.182345	0.038145	0.406915	0.029668
	0.181575	0.04025	0.401935	0.030406
	0.181981	0.033301	0.399331	0.030838
	0.182357	0.044366	0.396995	0.027768
	0.181626	0.042611	0.393001	0.026176
	0.181754	0.033671	0.389945	0.026657
	0.182437	0.034558	0.387266	0.028675
	0.183622	0.043307	0.383045	0.027797
	0.184604	0.035569	0.380166	0.026573
	0.18566	0.036117	0.37718	0.025412
	0.18691	0.029857	0.37398	0.023236
	0.187554	0.022653	0.369621	0.02412
	0.188453	0.027329	0.36487	0.025237
	0.188624	0.048328	0.36014	0.025342
	0.187303	0.029507	0.356545	0.021092
	0.187243	0.037411	0.352753	0.021541
	0.187137	0.046271	0.348601	0.022116
	0.186701	0.038036	0.344518	0.020389
	0.186161	0.032076	0.340769	0.022919
	0.186401	0.030181	0.337993	0.020885
	0.186207	0.031778	0.33482	0.022965
	0.186558	0.033481	0.331355	0.022843
	0.188485	0.053083	0.328381	0.01947
	0.189959	0.035566	0.324488	0.022147
	0.190127	0.030665	0.321064	0.019251
	0.190704	0.050175	0.318223	0.020375
	0.190186	0.041279	0.316117	0.020498
	0.188167	0.03321	0.313591	0.019022
	0.18715	0.03844	0.310846	0.021956
	0.186754	0.038889	0.30825	0.018709
	0.187478	0.035433	0.305797	0.018174
	0.187627	0.036032	0.301931	0.016339
	0.186272	0.048051	0.299051	0.018916
	0.185471	0.048306	0.296766	0.017946
	0.186052	0.049664	0.293146	0.018443
	0.187188	0.040659	0.289416	0.016044
	0.186246	0.035361	0.286162	0.021441
	0.184705	0.02888	0.28274	0.018352
	0.184479	0.034086	0.279254	0.014867
	0.184055	0.031157	0.276204	0.01528
1	0.183952	0.048254	0.272929	0.016763
	0.184234	0.044431	0.269983	0.01815
	0.184002	0.025277	0.267484	0.016589
	0.182523	0.037286	0.263988	0.016006
	0.180567	0.039215	0.260178	0.01355
	0.178833	0.039076	0.256797	0.012505
	0.177791	0.032258	0.254295	0.012399
	0.176637	0.031128	0.25088	0.015331
	0.177046	0.034945	0.247976	0.014744
	0.177038	0.034295	0.245814	0.015017
	0.176772	0.03599	0.243627	0.015601
	0.176867	0.032757	0.240763	0.015662
	0.176111	0.029262	0.237376	0.012832
	0.17608	0.030045	0.233951	0.014556
	0.174696	0.027078	0.231507	0.015095
	0.172572	0.033878	0.230091	0.013688
	0.170153	0.035264	0.228881	0.011287
	0.16946	0.024534	0.227107	0.012686
	0.169839	0.031247	0.225321	0.012817
	0.169248	0.029852	0.224901	0.012837
	0.168501	0.02514	0.223236	0.014612
	0.167339	0.048473	0.221247	0.013145
	0.165843	0.02879	0.219419	0.011863
	0.164927	0.022962	0.217851	0.012539
	0.164202	0.024267	0.21665	0.018435
	0.16342	0.019494	0.216968	0.014567
	0.163238	0.017718	0.216324	0.014941
	0.163131	0.027183	0.215203	0.014211
	0.162587	0.026912	0.213546	0.012107
	0.160293	0.023532	0.211858	0.012252
	0.158181	0.024095	0.210303	0.012279
	0.156819	0.027335	0.208383	0.010759
	0.153904	0.021412	0.206361	0.011071
	0.152675	0.02452	0.204864	0.01093
	0.151482	0.025998	0.204798	0.01548
	0.150234	0.021025	0.204116	0.011764
	0.14986	0.038608	0.202765	0.012893
	0.150061	0.04211	0.201728	0.013761
	0.149465	0.022305	0.201032	0.011678
	0.148873	0.0134	0.199618	0.012246
	0.14802	0.017221	0.197358	0.01191
	0.147792	0.020813	0.195624	0.010958
	0.147327	0.017734	0.194781	0.008499
	0.146832	0.027856	0.193406	0.00968
	0.146351	0.017881	0.192402	0.010966
	0.145433	0.019204	0.191144	0.012256
	0.144926	0.019777	0.188289	0.012088
	0.14319	0.019464	0.186152	0.01427
	0.141842	0.021837	0.184208	0.010687
	0.141918	0.021589	0.18295	0.010601
	0.142182	0.015526	0.18226	0.009524
	0.142148	0.024488	0.181215	0.01227
	0.141946	0.017831	0.180194	0.014307
	0.142162	0.01511	0.179694	0.018982
	0.142281	0.016618	0.179311	0.012609
	0.142356	0.013055	0.17788	0.009671
	0.142343	0.012818	0.176062	0.008849
	0.141619	0.014072	0.174528	0.010512
	0.140449	0.016379	0.172863	0.009742
	0.139153	0.017224	0.171318	0.010505
	0.138089	0.013314	0.169226	0.010248
	0.137495	0.014175	0.167266	0.011184
	0.136015	0.015749	0.165999	0.009044
	0.136246	0.015561	0.164548	0.0098
	0.135957	0.020984	0.16393	0.010818
	0.135305	0.017275	0.163587	0.013973
	0.134927	0.018444	0.16316	0.01343
	0.13493	0.017383	0.162835	0.011408
	0.135282	0.017132	0.161829	0.008721
	0.134971	0.017856	0.160849	0.00829
	0.134219	0.021387	0.159517	0.007863
	0.134269	0.01526	0.15766	0.009754
	0.13443	0.013645	0.155959	0.012375
	0.134595	0.027517	0.154214	0.009442
	0.135136	0.017357	0.15224	0.0091
	0.134275	0.016705	0.150317	0.007412
	0.134251	0.013576	0.148295	0.007371
	0.134041	0.012749	0.146159	0.007368
	0.134716	0.014402	0.144826	0.011015
	0.135428	0.013148	0.14374	0.013629
	0.135711	0.011728	0.142417	0.009361
	0.135466	0.017311	0.141804	0.00586
	0.13509	0.019279	0.141684	0.006378
	0.134838	0.022484	0.140266	0.007489
	0.133399	0.030121	0.138662	0.012368
	0.132921	0.020398	0.136848	0.009971
	0.132603	0.028085	0.135108	0.008234
	0.132109	0.020999	0.133793	0.006572
	0.130886	0.03359	0.132223	0.008272
	0.129871	0.027487	0.131052	0.01094
	0.129817	0.019522	0.129911	0.008391
	0.130037	0.016598	0.128989	0.00918
	0.129344	0.016941	0.128094	0.01229
	0.12886	0.017034	0.12743	0.008029
	0.128434	0.01859	0.126659	0.006768
	0.12756	0.019232	0.125907	0.006178
	0.126802	0.019924	0.125058	0.00731
	0.125283	0.016097	0.12448	0.009912
	0.124245	0.016475	0.124474	0.008662
	0.122868	0.016779	0.123358	0.007454
	0.121283	0.023314	0.122137	0.00668
	0.121078	0.028792	0.121488	0.00728
	0.120584	0.014813	0.12044	0.00791
	0.120804	0.014382	0.119342	0.007126
	0.121138	0.016487	0.118778	0.007707
	0.120964	0.022847	0.118285	0.008071
	0.120776	0.011489	0.117387	0.006105
	0.120615	0.009048	0.115851	0.00514
	0.120561	0.011296	0.114237	0.005423
	0.120682	0.013149	0.113324	0.005655
	0.120418	0.01328	0.112327	0.007843
	0.119881	0.017419	0.111348	0.009903
	0.118746	0.015063	0.110024	0.006533
	0.118042	0.010912	0.108843	0.004938
	0.117734	0.012494	0.107491	0.005671
	0.116492	0.012706	0.106337	0.007839
	0.115281	0.013252	0.105384	0.005348
	0.114606	0.017072	0.104337	0.005748
	0.114193	0.01636	0.103316	0.005663
	0.113205	0.01451	0.102464	0.004567
	0.112414	0.011596	0.101947	0.005239
	0.112553	0.01637	0.101277	0.005343
	0.112455	0.010635	0.100238	0.005246
	0.112956	0.006845	0.099368	0.006589
	0.112547	0.018659	0.098032	0.007582
	0.111909	0.008947	0.096825	0.009194
	0.112245	0.012869	0.095806	0.004297
	0.11206	0.012449	0.095237	0.005089
	0.111674	0.011965	0.094738	0.00417
	0.111408	0.013953	0.093915	0.004241
	0.110701	0.01186	0.093151	0.004746
2	0.110472	0.013228	0.09249	0.005341
	0.110367	0.021382	0.091982	0.005593
	0.110401	0.018759	0.09146	0.005805
	0.110282	0.012993	0.090805	0.004482
	0.109921	0.011873	0.090165	0.004992
	0.110135	0.024273	0.089989	0.005747
	0.10932	0.017786	0.089404	0.006594
	0.108964	0.016315	0.088967	0.005336
	0.109289	0.015589	0.088016	0.005127
	0.109066	0.01226	0.086769	0.0063
	0.108668	0.015042	0.0856	0.007889
	0.108211	0.01796	0.08462	0.005682
	0.106789	0.016285	0.0839	0.006264
	0.105303	0.017155	0.083354	0.00536
	0.103985	0.016716	0.082784	0.005204
	0.102906	0.017501	0.082461	0.005416
	0.100874	0.010468	0.082065	0.006419
	0.099578	0.011976	0.081581	0.006526
	0.098638	0.016577	0.08138	0.007496
	0.097582	0.011258	0.081526	0.005997
	0.097348	0.010842	0.081362	0.004943
	0.096919	0.013708	0.08111	0.005195
	0.096006	0.012383	0.08081	0.006378
	0.095631	0.012893	0.080353	0.005484
	0.095606	0.010031	0.080313	0.00485
	0.094766	0.006692	0.080253	0.005379
	0.093946	0.007617	0.079849	0.005505
	0.094299	0.008453	0.079549	0.004995
	0.094572	0.008651	0.078891	0.006142
	0.094083	0.009861	0.078561	0.005123
	0.094435	0.009078	0.078371	0.004954
	0.094765	0.009226	0.078339	0.004909
	0.094735	0.007965	0.077888	0.004275
	0.095089	0.00756	0.077231	0.004719
	0.094848	0.008996	0.076443	0.004249
	0.094863	0.009493	0.075794	0.004186
	0.094887	0.007986	0.075257	0.003854
	0.094901	0.008933	0.074618	0.004591
	0.094876	0.013404	0.074081	0.004495
	0.094191	0.012528	0.073672	0.004534
	0.093638	0.012558	0.073184	0.004467
	0.093223	0.012333	0.072993	0.00544
	0.092948	0.011816	0.072545	0.006546
	0.092659	0.012966	0.072134	0.005966
	0.09239	0.007946	0.07173	0.005516
	0.092232	0.006212	0.070882	0.004868
	0.092379	0.007342	0.070061	0.004435
	0.092516	0.008108	0.06932	0.004818
	0.092114	0.006843	0.068977	0.004355
	0.091462	0.007989	0.068708	0.004572
	0.090852	0.011281	0.068537	0.004689
	0.090362	0.012735	0.068071	0.004604
	0.089384	0.010627	0.067502	0.004058
	0.088146	0.010633	0.067178	0.004109
	0.086743	0.012013	0.066847	0.003958
	0.086511	0.014506	0.066723	0.004046
	0.086364	0.014183	0.066773	0.003619
	0.086687	0.014883	0.066394	0.004663
	0.087336	0.014779	0.066046	0.005189
	0.087904	0.01532	0.065525	0.004446
	0.08899	0.011846	0.06493	0.00414
	0.089393	0.012309	0.064351	0.004548
	0.089374	0.011788	0.063903	0.005618
	0.089046	0.008355	0.063352	0.002936
	0.088391	0.0093	0.062592	0.003964
	0.087752	0.009563	0.062149	0.004865
	0.087247	0.010331	0.061737	0.005408
	0.086515	0.014176	0.061342	0.00562
	0.085846	0.014238	0.061147	0.004652
	0.085689	0.017317	0.060631	0.00488
	0.085626	0.01706	0.060147	0.00481
	0.085817	0.015529	0.059379	0.004066
	0.085734	0.014223	0.058935	0.005521
	0.086074	0.009802	0.058486	0.004354
	0.086613	0.00879	0.058142	0.004506
	0.086903	0.010636	0.057834	0.004451
	0.086651	0.010312	0.057461	0.004683
	0.08636	0.008678	0.056982	0.00461
	0.085613	0.009105	0.056766	0.004583
	0.084817	0.010136	0.05654	0.003727
	0.083984	0.013387	0.056413	0.003731
	0.083021	0.012104	0.056332	0.003808
	0.082757	0.009743	0.05601	0.003471
	0.082188	0.009762	0.055364	0.004631
	0.081769	0.009417	0.054993	0.005581
	0.081826	0.009488	0.054995	0.004627
	0.081642	0.00856	0.054857	0.004845
	0.080982	0.009387	0.054682	0.004669
	0.080506	0.009433	0.054461	0.004436
	0.080141	0.009338	0.054228	0.003864
	0.079326	0.009089	0.053959	0.004092
	0.078204	0.009482	0.053628	0.003963
	0.07726	0.010635	0.053785	0.003465
	0.076631	0.007798	0.053709	0.002956
	0.075761	0.007864	0.053567	0.003445
	0.075131	0.010742	0.053381	0.003482
	0.074598	0.012324	0.053208	0.004377
	0.074648	0.005705	0.053038	0.00322
	0.074359	0.003061	0.05282	0.003226
	0.073549	0.004093	0.052443	0.003786
	0.072572	0.007036	0.052264	0.004473
	0.072078	0.006658	0.051866	0.004154
	0.071355	0.007373	0.05122	0.003831
	0.070478	0.009305	0.050956	0.003233
	0.070208	0.008544	0.050752	0.003597
	0.070019	0.011588	0.050539	0.004212
	0.069408	0.008107	0.050294	0.003509
	0.06899	0.01459	0.049991	0.004031
	0.069174	0.009822	0.049795	0.003995
	0.069246	0.005226	0.049533	0.004312
	0.069391	0.004047	0.049258	0.004755
	0.069373	0.00914	0.048908	0.004276
	0.069538	0.006061	0.048547	0.003804
	0.069374	0.005235	0.048101	0.004559
	0.06928	0.005776	0.04793	0.00424
	0.0694	0.007292	0.047579	0.004446
	0.069506	0.005295	0.047117	0.003152
	0.070005	0.006538	0.046804	0.003527
	0.069972	0.009706	0.046533	0.004248
	0.069983	0.005012	0.046328	0.003044
	0.070608	0.006428	0.046056	0.004176
	0.071106	0.00362	0.045615	0.002708
	0.070957	0.006088	0.045356	0.003179
	0.071157	0.008357	0.045221	0.003815
	0.071263	0.011627	0.045094	0.00426
	0.071182	0.012113	0.044952	0.00404
	0.070758	0.013267	0.044737	0.003891
	0.070509	0.013843	0.044295	0.004077
	0.070507	0.010616	0.043924	0.003589
	0.070223	0.006819	0.043483	0.003925
	0.070393	0.007853	0.043264	0.004102
3	0.070182	0.00542	0.043006	0.003443
	0.070277	0.006219	0.042733	0.003069
	0.070227	0.00797	0.042502	0.003627
	0.070196	0.00764	0.042162	0.003778
	0.06982	0.008329	0.041675	0.003263
	0.069369	0.007458	0.041466	0.00314
	0.068826	0.008766	0.041437	0.004082
	0.068046	0.008282	0.041321	0.004444
	0.067426	0.004812	0.041055	0.00336
	0.067008	0.006884	0.040828	0.003455
	0.066569	0.005716	0.040735	0.003151
	0.06628	0.006164	0.040594	0.0043
	0.066142	0.006207	0.040415	0.00335
	0.066053	0.005972	0.040222	0.002816
	0.066022	0.004822	0.040021	0.003108
	0.065719	0.004328	0.039769	0.00351
	0.065491	0.004689	0.03951	0.003277
	0.065166	0.005251	0.039224	0.003151
	0.064345	0.006253	0.038945	0.004119
	0.06378	0.007203	0.038837	0.003838
	0.063016	0.00708	0.038595	0.004058
	0.062612	0.005663	0.038311	0.003414
	0.062234	0.00461	0.03807	0.003714
	0.061897	0.005023	0.038046	0.003383
	0.061875	0.008593	0.038041	0.003048
	0.061907	0.00556	0.038212	0.002788
	0.061639	0.006719	0.038273	0.002884
	0.061242	0.004172	0.038264	0.003071
	0.060904	0.00336	0.038118	0.004146
	0.060585	0.003575	0.038032	0.003394
	0.060109	0.003076	0.037859	0.00392
	0.059575	0.002544	0.037711	0.003122
	0.059094	0.004166	0.037616	0.003143
	0.058476	0.004346	0.037402	0.003199
	0.057776	0.004007	0.037232	0.002791
	0.05737	0.005035	0.0371	0.003083
	0.057078	0.005376	0.036944	0.002985
	0.056718	0.006471	0.036839	0.003136
	0.056518	0.007982	0.036713	0.003747
	0.056491	0.007521	0.036589	0.004376
	0.05626	0.007068	0.036557	0.003494
	0.055955	0.007235	0.036565	0.003423
	0.055347	0.006254	0.036463	0.003634
	0.054751	0.006296	0.036342	0.003157
	0.054162	0.005457	0.036056	0.002954
	0.053449	0.005846	0.035721	0.00275
	0.052661	0.00499	0.035238	0.00302
	0.05209	0.004593	0.034886	0.003993
	0.051644	0.003797	0.034594	0.002843
	0.051143	0.00423	0.034435	0.002935
	0.050611	0.004528	0.034189	0.003309
	0.050232	0.005576	0.034022	0.003266
	0.049803	0.00586	0.033795	0.003648
	0.049312	0.004338	0.033624	0.003126
	0.048894	0.003964	0.033487	0.003676
	0.048408	0.004636	0.033193	0.003079
	0.047857	0.003819	0.032864	0.00341
	0.047589	0.003714	0.032699	0.00293
	0.047485	0.004811	0.032589	0.002909
	0.047494	0.004958	0.032457	0.003376
	0.047372	0.004825	0.032366	0.003035
	0.04713	0.004407	0.032076	0.003604
	0.046993	0.005652	0.031697	0.003202
	0.047129	0.005544	0.031424	0.002589
	0.047157	0.006489	0.031304	0.002776
	0.04712	0.008173	0.031062	0.003203
	0.047034	0.007959	0.030855	0.003207
	0.047084	0.007249	0.030756	0.003093
	0.047079	0.006396	0.030591	0.002887
	0.047028	0.004127	0.030386	0.002772
	0.046878	0.003452	0.030205	0.003086
	0.046792	0.004059	0.030156	0.003382
	0.046971	0.004288	0.030041	0.003092
	0.047023	0.005004	0.029992	0.00307
	0.046966	0.005485	0.029961	0.003433
	0.046988	0.004981	0.03002	0.00347
	0.047106	0.004486	0.030126	0.002806
	0.047008	0.004638	0.029994	0.002459
	0.046765	0.004554	0.029858	0.002958
	0.046366	0.00505	0.029795	0.003081
	0.046126	0.006388	0.02968	0.003718
	0.046161	0.004903	0.029615	0.0033
	0.046363	0.005213	0.029645	0.003297
	0.046258	0.005278	0.029745	0.00352
	0.046172	0.005186	0.029724	0.003766
	0.046188	0.004868	0.029595	0.002849
	0.046162	0.006261	0.029724	0.003224
	0.0463	0.006433	0.029861	0.002947
	0.046442	0.006237	0.02977	0.002903
	0.046675	0.005601	0.029636	0.003033
	0.046911	0.006058	0.029446	0.003174
	0.047306	0.00559	0.029233	0.002924
	0.047315	0.004912	0.029106	0.003017
	0.047239	0.00566	0.028989	0.003198
	0.047488	0.006601	0.028752	0.003896
	0.047749	0.005646	0.028467	0.002708
	0.047862	0.004797	0.028087	0.002662
	0.047833	0.004771	0.027778	0.002838
	0.047782	0.004925	0.027673	0.003153
	0.047772	0.004744	0.027542	0.002736
	0.048298	0.003569	0.027383	0.002819
	0.048382	0.004239	0.027272	0.003216
	0.048188	0.005839	0.026963	0.002931
	0.047875	0.005277	0.0268	0.003976
	0.048014	0.004191	0.02675	0.003964
	0.047919	0.003814	0.026741	0.003335
	0.04781	0.003694	0.026627	0.002851
	0.047602	0.00407	0.026367	0.002739
	0.047169	0.005475	0.02608	0.003268
	0.046943	0.005761	0.02592	0.003573
	0.046618	0.005432	0.025908	0.003139
	0.046172	0.003479	0.025918	0.002854
	0.045666	0.005732	0.02593	0.003152
	0.045563	0.005163	0.025934	0.003401
	0.045316	0.004077	0.025873	0.003275
	0.044856	0.004478	0.025913	0.003849
	0.044552	0.003159	0.025936	0.003494
	0.04439	0.004303	0.025936	0.004199
	0.044327	0.004011	0.026014	0.00322
	0.044393	0.002455	0.025931	0.003058
	0.044334	0.003681	0.025881	0.002952
	0.043788	0.00493	0.025789	0.00289
	0.04348	0.005567	0.025817	0.004108
	0.043335	0.005899	0.025897	0.003725
	0.043317	0.005269	0.025709	0.002981
	0.043011	0.004501	0.025395	0.003698
	0.042925	0.003823	0.025202	0.00292
	0.042718	0.004326	0.025259	0.002774
	0.042656	0.005179	0.02522	0.003198
	0.04248	0.005193	0.025189	0.002764
	0.042148	0.006047	0.025111	0.002683
4	0.041885	0.005783	0.024923	0.002936

## Sheet: 4C - Power Spectra 4-10-Hz - Co
Time	Non Pressers - Conflict	Non Pressers - Conflict	Pressers - Conflict	Pressers - Conflict
	Time course	SEM	Time course	SEM
4	0.052092	0.003916	0.02638	0.001832
	0.051847	0.003333	0.026403	0.001683
	0.051494	0.003831	0.026416	0.001732
	0.051047	0.003095	0.026411	0.001855
	0.050742	0.003998	0.026258	0.001973
	0.050369	0.003768	0.026007	0.00191
	0.05012	0.004094	0.025952	0.001927
	0.049892	0.005643	0.025967	0.002162
	0.049647	0.004342	0.025933	0.001953
	0.049672	0.00385	0.025896	0.00212
	0.049604	0.003854	0.02583	0.00208
	0.049763	0.003214	0.02589	0.001773
	0.049765	0.002795	0.025725	0.001643
	0.049668	0.003422	0.025624	0.002001
	0.049452	0.004433	0.025575	0.002222
	0.049181	0.003858	0.025506	0.001913
	0.048982	0.003307	0.025466	0.00182
	0.048937	0.002723	0.025492	0.001651
	0.048681	0.003114	0.02555	0.001696
	0.048517	0.00378	0.02568	0.00183
	0.048358	0.003307	0.026063	0.001656
	0.048573	0.005567	0.026822	0.002152
	0.048267	0.004331	0.027303	0.00203
	0.048097	0.002996	0.02736	0.00172
	0.048003	0.003258	0.02736	0.001705
	0.048022	0.002876	0.027364	0.00164
	0.048063	0.003849	0.027161	0.002006
	0.048054	0.003256	0.026952	0.001855
	0.048154	0.003886	0.026937	0.001895
	0.047965	0.002943	0.026882	0.002271
	0.047269	0.002876	0.02677	0.004515
	0.047013	0.00492	0.02679	0.006604
	0.046388	0.002715	0.026997	0.005224
	0.046078	0.002579	0.027419	0.00244
	0.046132	0.002899	0.027614	0.002025
	0.046335	0.003274	0.027584	0.002079
	0.046187	0.003671	0.027471	0.001795
	0.045881	0.003444	0.02748	0.00169
	0.045542	0.00285	0.027524	0.001651
	0.045381	0.00299	0.027636	0.001559
	0.045023	0.003188	0.027591	0.001616
	0.044915	0.003356	0.026954	0.001721
	0.044182	0.002657	0.025984	0.002581
	0.044144	0.003	0.025295	0.003392
	0.044114	0.003569	0.025077	0.002632
	0.04421	0.004313	0.024997	0.001961
	0.043979	0.004078	0.02494	0.001731
	0.04392	0.00357	0.024999	0.001809
	0.044015	0.002908	0.024934	0.00195
	0.044045	0.005395	0.02474	0.002523
	0.044293	0.004441	0.024612	0.00214
	0.044839	0.002992	0.024507	0.001713
	0.045053	0.003085	0.024346	0.001681
	0.045344	0.002241	0.023968	0.001551
	0.045297	0.002182	0.023518	0.001507
	0.044824	0.002787	0.023187	0.001808
	0.044231	0.002982	0.023112	0.001957
	0.044219	0.002767	0.023018	0.001958
	0.044163	0.002958	0.0227	0.001803
	0.044045	0.003655	0.022318	0.001778
	0.043598	0.003369	0.021932	0.001674
	0.0432	0.003517	0.021632	0.001759
	0.042834	0.003305	0.021527	0.001789
	0.042513	0.003625	0.021402	0.001815
	0.042196	0.004584	0.021323	0.001996
	0.042083	0.003716	0.021237	0.001763
	0.04204	0.003585	0.021026	0.001677
	0.042207	0.004124	0.020811	0.001718
	0.041847	0.003814	0.02072	0.001692
	0.041613	0.003165	0.020744	0.00157
	0.041416	0.002512	0.020752	0.001385
	0.041317	0.003151	0.020708	0.001553
	0.04099	0.003323	0.020773	0.001653
	0.040606	0.003387	0.020761	0.00159
	0.040252	0.002884	0.020699	0.001638
	0.039985	0.00395	0.020695	0.001815
	0.03988	0.004549	0.020704	0.00186
	0.040098	0.004156	0.02065	0.001842
	0.040007	0.002819	0.020695	0.001555
	0.040368	0.002963	0.020809	0.001673
	0.040617	0.003832	0.020956	0.001714
	0.040928	0.003586	0.021094	0.001689
	0.041424	0.003038	0.021176	0.00164
	0.041603	0.002743	0.021245	0.001475
	0.042113	0.002466	0.021329	0.001503
	0.042397	0.002815	0.021333	0.001504
	0.042348	0.003083	0.021291	0.001628
	0.041916	0.00241	0.021238	0.001536
	0.041491	0.002859	0.02115	0.001535
	0.041987	0.00379	0.020993	0.001826
	0.042089	0.003146	0.02084	0.001633
	0.042197	0.003007	0.020834	0.001608
	0.042149	0.003394	0.020815	0.001838
	0.042049	0.003112	0.02054	0.001684
	0.04191	0.00301	0.020372	0.001696
	0.041889	0.003256	0.020292	0.001637
	0.041934	0.003598	0.020114	0.001616
	0.041996	0.002632	0.02002	0.001485
	0.041886	0.002215	0.019981	0.001461
	0.041833	0.004519	0.019866	0.001902
	0.041383	0.002955	0.019842	0.001698
	0.041052	0.002779	0.019819	0.001753
	0.040854	0.003302	0.019764	0.001703
	0.040713	0.002635	0.019703	0.001448
	0.040637	0.002277	0.019608	0.001376
	0.040429	0.002434	0.019451	0.001589
	0.040146	0.002297	0.019361	0.001572
	0.040033	0.002686	0.019352	0.001551
	0.040458	0.003269	0.019433	0.001673
	0.040626	0.002231	0.019385	0.001446
	0.040172	0.002071	0.01925	0.001493
	0.040064	0.002681	0.019128	0.001659
	0.039907	0.002331	0.018951	0.001659
	0.039736	0.002663	0.018849	0.001762
	0.039702	0.002523	0.018892	0.001554
	0.039725	0.00279	0.018874	0.001592
	0.039572	0.002471	0.018784	0.001536
	0.0395	0.002863	0.01876	0.00173
	0.0396	0.003517	0.018854	0.001863
	0.039658	0.003716	0.019074	0.001708
	0.03968	0.003482	0.019134	0.001584
	0.039962	0.002907	0.018939	0.00151
	0.039935	0.002486	0.018714	0.00147
	0.039596	0.00333	0.018582	0.001683
	0.039219	0.003146	0.018484	0.001606
	0.038948	0.003303	0.018344	0.001566
	0.038817	0.003097	0.018251	0.001454
	0.03894	0.003334	0.018183	0.001642
	0.038931	0.003581	0.017966	0.002334
	0.038544	0.003096	0.017751	0.002841
	0.038488	0.002934	0.017734	0.002318
5	0.038535	0.003486	0.017785	0.001778
	0.038509	0.002276	0.017781	0.001409
	0.038498	0.002465	0.017714	0.001469
	0.038372	0.002026	0.017616	0.001478
	0.038475	0.002443	0.017578	0.001359
	0.038563	0.003124	0.017746	0.001569
	0.038693	0.003276	0.017942	0.001698
	0.038884	0.002471	0.01798	0.001442
	0.038908	0.002633	0.017711	0.001443
	0.038904	0.002576	0.017406	0.001565
	0.039008	0.002761	0.017299	0.001556
	0.038797	0.00291	0.017248	0.001472
	0.038839	0.003134	0.017273	0.001538
	0.038884	0.002838	0.017234	0.00146
	0.038913	0.003139	0.017166	0.001724
	0.039035	0.002982	0.017127	0.001879
	0.039096	0.003052	0.017173	0.002014
	0.039145	0.004243	0.017266	0.001935
	0.039252	0.004422	0.017504	0.001828
	0.039191	0.003435	0.017627	0.001768
	0.038908	0.003719	0.017567	0.001779
	0.038721	0.004019	0.017469	0.001863
	0.038455	0.003517	0.017413	0.001678
	0.038196	0.002635	0.017381	0.001508
	0.038133	0.002363	0.017323	0.001423
	0.037822	0.002192	0.01724	0.001296
	0.037511	0.002484	0.016998	0.001629
	0.037376	0.003511	0.016746	0.002167
	0.037136	0.003699	0.016541	0.00223
	0.036964	0.002878	0.016461	0.001707
	0.037016	0.003057	0.016386	0.0014
	0.036965	0.002996	0.016305	0.001533
	0.036776	0.002809	0.016311	0.001425
	0.036665	0.002817	0.0163	0.001425
	0.036773	0.003196	0.016383	0.001506
	0.036776	0.003647	0.016353	0.001631
	0.03679	0.003302	0.016312	0.001636
	0.036639	0.003147	0.016238	0.001669
	0.036301	0.003033	0.016083	0.001628
	0.036198	0.003157	0.015948	0.001603
	0.036197	0.003509	0.015863	0.001616
	0.036434	0.004068	0.015886	0.0017
	0.036532	0.003004	0.015879	0.001479
	0.036668	0.00349	0.015853	0.001571
	0.036794	0.003027	0.015898	0.001629
	0.036831	0.003443	0.015998	0.001565
	0.036815	0.003322	0.016063	0.001498
	0.036863	0.003083	0.016166	0.001597
	0.036826	0.0034	0.016242	0.001728
	0.037097	0.002955	0.016305	0.001726
	0.037167	0.002452	0.016352	0.001618
	0.036781	0.003447	0.016282	0.00162
	0.036278	0.003369	0.016137	0.001537
	0.036148	0.004073	0.016113	0.001904
	0.035945	0.004061	0.016075	0.001784
	0.035926	0.003539	0.015867	0.001598
	0.03601	0.003136	0.015805	0.001494
	0.036004	0.003919	0.015817	0.001746
	0.036002	0.003442	0.015798	0.001686
	0.035916	0.003856	0.015689	0.002039
	0.035804	0.003483	0.015609	0.002141
	0.035837	0.003423	0.015624	0.001674
	0.035846	0.002495	0.015593	0.00143
	0.03593	0.002207	0.015672	0.001457
	0.035875	0.002543	0.015828	0.00152
	0.035822	0.002816	0.01591	0.001434
	0.035796	0.002958	0.015903	0.001438
	0.035739	0.002743	0.015884	0.001467
	0.035581	0.002622	0.015738	0.001611
	0.03546	0.002469	0.015662	0.001479
	0.034958	0.002781	0.01567	0.001373
	0.034799	0.003236	0.015696	0.001471
	0.03472	0.004119	0.015783	0.00168
	0.034925	0.004496	0.016017	0.001858
	0.03506	0.004411	0.016043	0.001989
	0.03537	0.00373	0.016045	0.001739
	0.035522	0.003133	0.016161	0.001498
	0.035677	0.002991	0.016214	0.001427
	0.035703	0.002621	0.016248	0.001356
	0.035785	0.002585	0.016189	0.001334
	0.036099	0.003342	0.016099	0.001562
	0.036111	0.004317	0.01595	0.001738
	0.03609	0.002612	0.015843	0.001414
	0.035973	0.002947	0.015862	0.001624
	0.035969	0.003138	0.015905	0.001567
	0.036118	0.004259	0.015967	0.001773
	0.036108	0.003447	0.015957	0.00168
	0.036108	0.003008	0.015989	0.001677
	0.03627	0.003126	0.016001	0.001801
	0.036509	0.00341	0.016066	0.001854
	0.036822	0.003674	0.016047	0.001746
	0.037287	0.003159	0.016029	0.001568
	0.037489	0.003207	0.016051	0.001616
	0.037744	0.003232	0.016073	0.001679
	0.037918	0.003448	0.016014	0.00197
	0.037953	0.004053	0.015944	0.00223
	0.037662	0.003099	0.015855	0.001792
	0.037542	0.003228	0.015757	0.001697
	0.037449	0.00377	0.015737	0.001752
	0.037383	0.003482	0.015734	0.001785
	0.037588	0.004056	0.015774	0.00186
	0.037582	0.003707	0.015879	0.001762
	0.037864	0.003958	0.015995	0.001913
	0.038122	0.00365	0.016135	0.00189
	0.038251	0.003575	0.016282	0.001757
	0.037997	0.003285	0.016369	0.001665
	0.03762	0.003025	0.016405	0.001885
	0.037443	0.003563	0.016337	0.001898
	0.037473	0.003577	0.016292	0.001885
	0.037719	0.00421	0.016285	0.002237
	0.037917	0.004796	0.016229	0.00202
	0.037836	0.004902	0.016188	0.00194
	0.037647	0.004148	0.016114	0.001861
	0.037582	0.003518	0.016072	0.001895
	0.037495	0.002935	0.01603	0.002242
	0.037394	0.003122	0.015974	0.00227
	0.037371	0.003034	0.015979	0.002144
	0.037609	0.002687	0.015989	0.001627
	0.037777	0.002765	0.015973	0.001566
	0.037868	0.003605	0.015898	0.001805
	0.038091	0.003241	0.015837	0.001658
	0.037949	0.003641	0.015808	0.001812
	0.038003	0.003706	0.015797	0.001815
	0.037783	0.003841	0.015849	0.001954
	0.037615	0.0035	0.015802	0.001759
	0.037418	0.005271	0.015634	0.00202
	0.03765	0.004375	0.015388	0.002208
	0.038036	0.004465	0.015113	0.002181
	0.038358	0.004538	0.015065	0.00179
	0.038493	0.004586	0.015038	0.001811
	0.038112	0.005264	0.01496	0.00204
6	0.037859	0.004595	0.014973	0.00194
	0.037939	0.004099	0.015044	0.001885
	0.037973	0.003054	0.01513	0.001674
	0.037951	0.003424	0.015159	0.001684
	0.038054	0.003606	0.015117	0.001688
	0.038128	0.003764	0.015104	0.001658
	0.038247	0.003354	0.015132	0.001575
	0.038117	0.003246	0.015177	0.001678
	0.03777	0.003154	0.015298	0.001676
	0.037529	0.003024	0.015372	0.001658
	0.037453	0.003879	0.015386	0.001787
	0.037455	0.004117	0.015481	0.001794
	0.037282	0.003908	0.015593	0.001754
	0.037179	0.004207	0.015524	0.001804
	0.037051	0.003624	0.015499	0.001708
	0.037031	0.003727	0.015541	0.001768
	0.036884	0.003925	0.015585	0.001823
	0.03659	0.003284	0.015639	0.001703
	0.036313	0.003335	0.015743	0.001794
	0.036012	0.003644	0.015837	0.001911
	0.036257	0.003662	0.015962	0.001783
	0.036387	0.003402	0.016004	0.001941
	0.036063	0.004216	0.01614	0.001945
	0.035863	0.004672	0.016176	0.001981
	0.035791	0.004114	0.016179	0.001854
	0.035683	0.003696	0.016194	0.001755
	0.035677	0.003813	0.016098	0.001909
	0.035719	0.00349	0.016048	0.001722
	0.03597	0.003111	0.016042	0.001665
	0.036158	0.003288	0.015973	0.001957
	0.036219	0.004522	0.015894	0.002065
	0.036033	0.00494	0.015863	0.001973
	0.035804	0.00443	0.015752	0.002046
	0.035865	0.003279	0.015665	0.001722
	0.03609	0.002922	0.015787	0.001689
	0.036281	0.003438	0.015831	0.001811
	0.036682	0.004754	0.015781	0.001959
	0.036855	0.004172	0.015767	0.001864
	0.037169	0.004369	0.015819	0.002058
	0.037557	0.004797	0.015919	0.002131
	0.03772	0.004136	0.015954	0.001854
	0.037723	0.003476	0.015925	0.001627
	0.037667	0.004136	0.015955	0.001785
	0.037892	0.004239	0.015814	0.001848
	0.038138	0.004506	0.015751	0.001988
	0.03821	0.004226	0.015786	0.001969
	0.038367	0.004426	0.015774	0.002186
	0.038236	0.00425	0.015867	0.00205
	0.0381	0.004143	0.016007	0.001938
	0.038069	0.004737	0.016206	0.002374
	0.038098	0.003853	0.016455	0.001991
	0.03818	0.004253	0.016722	0.002012
	0.038384	0.003918	0.016839	0.001947
	0.038688	0.005002	0.016884	0.001971
	0.038851	0.004738	0.016946	0.00193
	0.038789	0.004364	0.016881	0.001878
	0.038581	0.004883	0.016858	0.002363
	0.038212	0.004869	0.016901	0.002251
	0.038005	0.004157	0.016974	0.002137
	0.037734	0.003988	0.017003	0.002242
	0.037469	0.003576	0.016872	0.002326
	0.037514	0.003841	0.016892	0.002389
	0.037376	0.00426	0.016968	0.002274
	0.037426	0.004604	0.017006	0.002088
	0.037746	0.00447	0.017094	0.001969
	0.037864	0.004707	0.017151	0.001969
	0.037944	0.004412	0.017169	0.001941
	0.037803	0.003998	0.017325	0.001893
	0.037855	0.003508	0.017521	0.00185
	0.038049	0.003355	0.017611	0.00191
	0.038042	0.003926	0.017424	0.001795
	0.038002	0.003722	0.017232	0.001876
	0.038029	0.004117	0.017119	0.001999
	0.037898	0.005012	0.017105	0.002219
	0.037756	0.005297	0.017172	0.002321
	0.03757	0.004924	0.017225	0.002221
	0.037636	0.004208	0.017325	0.002249
	0.037631	0.004188	0.017412	0.002224
	0.037798	0.004648	0.017512	0.002419
	0.037963	0.005656	0.017536	0.002535
	0.038044	0.006873	0.017528	0.002687
	0.038117	0.005096	0.017642	0.002383
	0.038117	0.005113	0.01758	0.002348
	0.038049	0.006148	0.017557	0.002519
	0.038045	0.005805	0.017614	0.002534
	0.03768	0.004601	0.017608	0.002107
	0.037418	0.006069	0.017687	0.002526
	0.03719	0.004647	0.017699	0.002175
	0.037222	0.004576	0.017615	0.002259
	0.037251	0.004252	0.017503	0.002165
	0.036969	0.004765	0.017476	0.002144
	0.036732	0.00459	0.017616	0.002556
	0.036952	0.004328	0.017681	0.002209
	0.037104	0.00539	0.017684	0.00233
	0.037168	0.00577	0.017664	0.00261
	0.037177	0.004113	0.017686	0.002622
	0.037323	0.004007	0.017681	0.002722
	0.037457	0.004557	0.017629	0.002507
	0.037704	0.00627	0.017532	0.002506
	0.037647	0.005253	0.017448	0.002439
	0.037562	0.004656	0.017376	0.002359
	0.03786	0.004206	0.01729	0.002197
	0.038015	0.004475	0.017191	0.002235
	0.038122	0.005484	0.017284	0.002366
	0.038419	0.005146	0.017468	0.00225
	0.038574	0.004636	0.017586	0.002222
	0.038757	0.004928	0.017709	0.002213
	0.039026	0.005029	0.017672	0.002199
	0.039434	0.004446	0.017673	0.002119
	0.039665	0.004664	0.017643	0.002281
	0.039826	0.006011	0.017627	0.002411
	0.03997	0.006784	0.017591	0.002553
	0.040033	0.005286	0.01761	0.00239
	0.03975	0.004608	0.017624	0.002248
	0.039397	0.004213	0.017683	0.002287
	0.039269	0.004519	0.017763	0.002276
	0.039207	0.004631	0.017784	0.002391
	0.038941	0.005325	0.0178	0.002543
	0.03863	0.00634	0.017727	0.002465
	0.03848	0.006238	0.01772	0.002573
	0.038575	0.004717	0.017768	0.002173
	0.038602	0.004597	0.017926	0.002538
	0.038621	0.004752	0.018152	0.00268
	0.03878	0.004214	0.018331	0.002536
	0.038875	0.003602	0.018372	0.002206
	0.03897	0.00377	0.018268	0.002524
	0.038907	0.004188	0.018232	0.002462
	0.038829	0.004311	0.018213	0.002741
	0.038858	0.005751	0.018236	0.00286
	0.038741	0.005164	0.018278	0.002778
	0.038684	0.004765	0.01841	0.002977
7	0.038732	0.004369	0.018525	0.003021
	0.038929	0.005108	0.018641	0.002792
	0.039128	0.00488	0.01884	0.002767
	0.039231	0.004886	0.019025	0.002433
	0.039461	0.005526	0.019098	0.00293
	0.039693	0.005178	0.01928	0.003152
	0.039928	0.00446	0.019414	0.002778
	0.040082	0.005101	0.019497	0.002381
	0.040235	0.005136	0.019678	0.002533
	0.040359	0.006085	0.019854	0.002739
	0.040424	0.006118	0.019958	0.00271
	0.040823	0.005605	0.019962	0.002622
	0.040818	0.005536	0.019878	0.002633
	0.040747	0.005387	0.019812	0.002635
	0.040788	0.005289	0.019799	0.002386
	0.040652	0.00463	0.019795	0.002406
	0.04077	0.005131	0.019795	0.002387
	0.041001	0.004734	0.019789	0.002301
	0.041043	0.004812	0.019907	0.002476
	0.041143	0.005145	0.019861	0.002776
	0.04097	0.006559	0.019776	0.003105
	0.0408	0.00594	0.01971	0.003045
	0.04066	0.005471	0.019625	0.002698
	0.040541	0.005345	0.019417	0.002533
	0.040559	0.005828	0.019194	0.00262
	0.040422	0.005591	0.019093	0.002451
	0.040077	0.005071	0.019022	0.002504
	0.03988	0.005156	0.019005	0.002445
	0.039956	0.005765	0.01903	0.002649
	0.040166	0.005011	0.01917	0.002937
	0.040217	0.005864	0.019146	0.002755
	0.040327	0.005419	0.01907	0.002549
	0.04016	0.005072	0.019098	0.002314
	0.040079	0.00508	0.019177	0.002463
	0.040031	0.004512	0.01916	0.002208
	0.039829	0.003879	0.019144	0.002193
	0.04003	0.005089	0.019149	0.003081
	0.040248	0.006295	0.019122	0.002971
	0.040168	0.005702	0.019179	0.002574
	0.04002	0.005344	0.019105	0.002814
	0.03995	0.006357	0.019238	0.002675
	0.040014	0.00658	0.019371	0.002698
	0.040157	0.007604	0.01949	0.00291
	0.040281	0.006021	0.019621	0.00245
	0.040341	0.005695	0.019727	0.002474
	0.040562	0.006592	0.019799	0.002819
	0.040932	0.006047	0.019912	0.002658
	0.041365	0.005767	0.019995	0.00265
	0.041624	0.007843	0.02	0.003093
	0.041668	0.007836	0.020057	0.003023
	0.04162	0.007307	0.019986	0.003037
	0.041661	0.006361	0.019946	0.003058
	0.041613	0.007032	0.020009	0.002964
	0.041551	0.007026	0.020097	0.003213
	0.041534	0.006293	0.020115	0.002879
	0.041383	0.006114	0.020254	0.002667
	0.041307	0.006337	0.020402	0.002831
	0.04109	0.00675	0.020497	0.0029
	0.040698	0.006762	0.020613	0.00283
	0.040616	0.005797	0.0208	0.002653
	0.040479	0.005575	0.020992	0.002541
	0.040324	0.00562	0.021161	0.002595
	0.040302	0.00587	0.021365	0.002653
	0.040147	0.006048	0.021518	0.002636
	0.040093	0.005668	0.021606	0.002582
	0.040138	0.006294	0.021723	0.00288
	0.039981	0.005951	0.021838	0.003076
	0.039703	0.006137	0.02191	0.003335
	0.039545	0.006137	0.021894	0.003045
	0.039495	0.006354	0.021901	0.003099
	0.039363	0.007142	0.021873	0.003162
	0.039169	0.006354	0.021807	0.00313
	0.038768	0.005812	0.021877	0.003183
	0.038294	0.006207	0.021943	0.003272
	0.038049	0.006708	0.021916	0.003181
	0.037841	0.006368	0.022022	0.003174
	0.037755	0.006746	0.021956	0.002964
	0.037796	0.006747	0.021911	0.003048
	0.037463	0.007343	0.021952	0.003037
	0.037286	0.006247	0.022073	0.002753
	0.036968	0.005838	0.022164	0.002895
	0.036835	0.00571	0.022161	0.002546
	0.036587	0.005114	0.022091	0.002324
	0.036219	0.004913	0.021958	0.002532
	0.036096	0.004882	0.021881	0.002492
	0.035936	0.004193	0.021833	0.002627
	0.035811	0.004489	0.02171	0.002407
	0.035784	0.004762	0.021683	0.002422
	0.035844	0.005506	0.021657	0.002578
	0.035947	0.005792	0.021596	0.002814
	0.035985	0.005379	0.021489	0.003105
	0.036061	0.005737	0.021503	0.002703
	0.035941	0.005727	0.021767	0.002736
	0.036041	0.005716	0.021987	0.002971
	0.035982	0.005789	0.022079	0.003044
	0.035713	0.006031	0.022082	0.002981
	0.035638	0.005758	0.022173	0.002902
	0.035625	0.005645	0.022372	0.00254
	0.035524	0.00578	0.022547	0.002649
	0.035482	0.005442	0.022504	0.002895
	0.035389	0.006359	0.022492	0.003125
	0.03539	0.005783	0.022358	0.002833
	0.035174	0.005183	0.022431	0.002837
	0.035034	0.004243	0.02259	0.002639
	0.035004	0.004516	0.02264	0.00263
	0.034995	0.004602	0.022663	0.002722
	0.034986	0.003949	0.022831	0.003112
	0.034828	0.004631	0.023009	0.002745
	0.03457	0.004564	0.02306	0.002614
	0.03415	0.004974	0.023235	0.002666
	0.033597	0.004931	0.023589	0.002688
	0.032985	0.004622	0.023981	0.002396
	0.032576	0.004996	0.024089	0.002602
	0.032443	0.004923	0.02401	0.002508
	0.032157	0.004663	0.023945	0.002653
	0.032097	0.005291	0.023962	0.002622
	0.032079	0.004623	0.024106	0.002964
	0.032007	0.005158	0.023951	0.002805
	0.031938	0.004955	0.023676	0.002636
	0.031822	0.003978	0.023451	0.002621
	0.031945	0.004544	0.023512	0.003029
	0.032014	0.004614	0.023528	0.003286
	0.031914	0.003931	0.023615	0.002844
	0.032047	0.003583	0.02363	0.002648
	0.032119	0.003793	0.023546	0.002538
	0.032227	0.003815	0.023596	0.002765
	0.03207	0.003499	0.023545	0.003021
	0.031718	0.003567	0.023493	0.002553
	0.031373	0.003893	0.023482	0.002554
	0.031175	0.004006	0.02347	0.002614
	0.031192	0.004402	0.023283	0.00265
8	0.031305	0.004295	0.022964	0.003102
	0.031296	0.00405	0.022679	0.003031
	0.031054	0.003949	0.022489	0.002598
	0.030738	0.003875	0.022383	0.002724
	0.030742	0.004815	0.022419	0.002753
	0.030482	0.004934	0.022385	0.002625
	0.030351	0.005024	0.022327	0.003004
	0.030094	0.004346	0.022479	0.002464
	0.029724	0.004132	0.022643	0.002542
	0.029525	0.004284	0.022636	0.002307
	0.029218	0.004805	0.022557	0.002551
	0.02886	0.00407	0.022494	0.002657
	0.028871	0.003618	0.022379	0.002197
	0.028819	0.00376	0.022307	0.002362
	0.0288	0.004037	0.022297	0.002579
	0.028653	0.003931	0.022137	0.002444
	0.028608	0.00359	0.022093	0.002312
	0.028699	0.003835	0.021923	0.002501
	0.028779	0.003997	0.021718	0.00229
	0.028704	0.004226	0.021685	0.00225
	0.028477	0.003922	0.02186	0.002359
	0.028273	0.003504	0.022048	0.002387
	0.02807	0.003374	0.022135	0.002477
	0.028029	0.003597	0.022249	0.002503
	0.028098	0.003891	0.022159	0.002308
	0.027747	0.003443	0.022054	0.00214
	0.027609	0.003298	0.022018	0.002277
	0.027343	0.003678	0.022068	0.002985
	0.027145	0.003431	0.021948	0.00221
	0.02717	0.003276	0.021912	0.002312
	0.027244	0.003618	0.021862	0.002612
	0.027248	0.00394	0.021815	0.002626
	0.027232	0.0032	0.021772	0.002341
	0.027043	0.002827	0.02181	0.002511
	0.026876	0.002795	0.021685	0.002369
	0.02676	0.002949	0.021447	0.002112
	0.02657	0.003091	0.021426	0.002154
	0.026301	0.003031	0.021416	0.002288
	0.02598	0.00319	0.021449	0.002189
	0.025751	0.003604	0.021439	0.00213
	0.025574	0.003182	0.021364	0.001915
	0.025471	0.002981	0.02113	0.001854
	0.025236	0.003109	0.02092	0.002084
	0.025115	0.003356	0.020722	0.002219
	0.025094	0.003294	0.020588	0.002315
	0.024961	0.00319	0.020568	0.002385
	0.025111	0.003284	0.020556	0.002147
	0.02535	0.003363	0.02042	0.002159
	0.025587	0.003375	0.020198	0.002133
	0.025667	0.002889	0.020129	0.001854
	0.025497	0.003388	0.019979	0.002079
	0.025061	0.002904	0.019867	0.00203
	0.024768	0.003069	0.01984	0.002054
	0.024533	0.003416	0.019606	0.00195
	0.024281	0.003122	0.019264	0.001807
	0.024086	0.003109	0.0192	0.002236
	0.024019	0.003466	0.01922	0.002514
	0.024067	0.003082	0.019091	0.001936
	0.02405	0.002826	0.018998	0.001875
	0.023953	0.002691	0.018921	0.002033
	0.023864	0.002777	0.018874	0.001931
	0.023859	0.00292	0.018749	0.001732
	0.023745	0.002449	0.018576	0.001792
	0.023689	0.002479	0.018376	0.001629
	0.023614	0.002579	0.018261	0.001645
	0.023541	0.003207	0.018093	0.001964
	0.023421	0.002851	0.017976	0.001911
	0.023171	0.002774	0.017677	0.001739
	0.022785	0.002688	0.017612	0.001934
	0.022362	0.002282	0.017549	0.001941
	0.022116	0.002303	0.017294	0.001813
	0.021993	0.002483	0.017159	0.001617
	0.022051	0.002413	0.01713	0.00156
	0.022021	0.002764	0.01698	0.001659
	0.022144	0.002435	0.016865	0.001587
	0.022185	0.002573	0.016872	0.001696
	0.022135	0.002061	0.016721	0.001587
	0.021901	0.002001	0.016582	0.001532
	0.021566	0.002283	0.016396	0.001688
	0.021301	0.001947	0.016173	0.001619
	0.021151	0.001812	0.015921	0.001414
	0.020998	0.001999	0.015739	0.001474
	0.020749	0.002004	0.01559	0.001505
	0.020554	0.002131	0.01555	0.001501
	0.020363	0.00233	0.015441	0.001377
	0.020236	0.002236	0.015363	0.001523
	0.020068	0.002376	0.015347	0.001604
	0.019971	0.002597	0.015315	0.001517
	0.019995	0.001986	0.015316	0.001293
	0.019924	0.002151	0.015133	0.001428
	0.019959	0.002474	0.014919	0.001441
	0.019936	0.002499	0.014872	0.001468
	0.019866	0.002032	0.014866	0.001461
	0.019746	0.001788	0.014732	0.001486
	0.019664	0.001966	0.014591	0.00132
	0.019453	0.001995	0.014594	0.001345
	0.019279	0.002008	0.01448	0.001336
	0.019077	0.002265	0.014392	0.001455
	0.018875	0.002171	0.014339	0.001352
	0.018783	0.001678	0.014395	0.001208
	0.018713	0.001723	0.014475	0.00123
	0.01858	0.002014	0.014563	0.001376
	0.018482	0.001841	0.014566	0.00146
	0.018464	0.001874	0.014619	0.001247
	0.018468	0.00228	0.014524	0.001221
	0.018415	0.001952	0.01449	0.001256
	0.018301	0.001726	0.014361	0.001279
	0.01819	0.001435	0.014241	0.001407
	0.018048	0.001378	0.014095	0.001315
	0.01787	0.001241	0.01397	0.001208
	0.017801	0.00153	0.013921	0.001372
	0.017725	0.001682	0.01394	0.001373
	0.017641	0.001561	0.013893	0.001206
	0.017588	0.001626	0.013789	0.001287
	0.017427	0.001544	0.013737	0.001158
	0.017221	0.001655	0.013674	0.001091
	0.017031	0.001734	0.013521	0.000931
	0.016854	0.001486	0.013445	0.001061
	0.016779	0.001437	0.013365	0.00115
	0.016696	0.001512	0.013198	0.001143
	0.016606	0.001363	0.013033	0.001066
	0.016516	0.001373	0.012817	0.001075
	0.016554	0.001361	0.012551	0.001123
	0.016552	0.001357	0.012362	0.001203
	0.016455	0.001594	0.012181	0.001244
	0.016365	0.001308	0.012092	0.001151
	0.016345	0.001437	0.01201	0.001072
	0.016324	0.001123	0.01209	0.001041
	0.016254	0.001187	0.012091	0.001082
	0.016122	0.001316	0.012039	0.000946
	0.015994	0.001494	0.012	0.001052
9	0.015889	0.00154	0.011962	0.000982
	0.01576	0.001324	0.011816	0.000961
	0.015616	0.001419	0.011765	0.000962
	0.015447	0.001101	0.011702	0.000866
	0.015415	0.001239	0.011617	0.001009
	0.015478	0.00141	0.011539	0.000968
	0.015477	0.001329	0.011459	0.001047
	0.015424	0.001392	0.011326	0.001024
	0.015363	0.001318	0.011181	0.001013
	0.01537	0.001197	0.011157	0.000979
	0.015294	0.001204	0.011114	0.00101
	0.015182	0.001192	0.01105	0.000863
	0.015063	0.001152	0.010968	0.000925
	0.014973	0.001287	0.010934	0.001015
	0.014985	0.001297	0.010933	0.001004
	0.015	0.001382	0.010873	0.00101
	0.014994	0.00118	0.010866	0.000822
	0.014925	0.001302	0.010774	0.000772
	0.014859	0.001314	0.010707	0.000849
	0.01477	0.001516	0.010703	0.001138
	0.014679	0.001476	0.010658	0.000993
	0.014637	0.001257	0.010529	0.000968
	0.014552	0.001221	0.010477	0.000782
	0.014482	0.000996	0.010349	0.00075
	0.014359	0.001171	0.010227	0.000896
	0.014158	0.001354	0.010178	0.000878
	0.013921	0.001493	0.010202	0.000903
	0.013765	0.001347	0.010257	0.000846
	0.013657	0.000969	0.010301	0.000824
	0.013576	0.000891	0.010337	0.000825
	0.013464	0.000931	0.010273	0.000804
	0.013395	0.000915	0.010207	0.000751
	0.013356	0.000848	0.010203	0.000884
	0.01322	0.000875	0.010218	0.000714
	0.013111	0.000857	0.010214	0.000673
	0.013048	0.000814	0.010135	0.000639
	0.012985	0.000725	0.010091	0.000796
	0.012938	0.000804	0.010058	0.000912
	0.012928	0.001025	0.010019	0.000803
	0.012916	0.001069	0.009958	0.000908
	0.012946	0.001321	0.009889	0.00079
	0.012936	0.001034	0.009794	0.000734
	0.012916	0.000921	0.009763	0.00081
	0.012926	0.000968	0.009725	0.000667
	0.012899	0.001026	0.009696	0.000746
	0.012961	0.000883	0.009683	0.000774
	0.012999	0.000987	0.00964	0.000706
	0.012968	0.001042	0.00954	0.000757
	0.012893	0.000985	0.009445	0.000784
	0.01287	0.000961	0.009342	0.000757
	0.012869	0.000973	0.009227	0.000832
	0.012893	0.000919	0.009162	0.000694
	0.012943	0.000978	0.009167	0.000649
	0.012924	0.001299	0.009135	0.000693
	0.012862	0.001213	0.009093	0.000673
	0.012836	0.000894	0.009028	0.000675
	0.012735	0.000944	0.008977	0.000662
	0.012563	0.001038	0.008956	0.000695
	0.012404	0.000989	0.008873	0.000751
	0.012244	0.000976	0.008777	0.000698
	0.012129	0.000946	0.008696	0.00062
	0.012086	0.001041	0.008591	0.000666
	0.012134	0.001066	0.008578	0.000817
	0.012101	0.000927	0.008615	0.000735
	0.012077	0.000787	0.008642	0.000646
	0.012084	0.000736	0.008664	0.000629
	0.012051	0.000946	0.008668	0.000616
	0.012045	0.000967	0.008702	0.000643
	0.012039	0.000961	0.008761	0.000611
	0.012049	0.000874	0.008781	0.000601
	0.012018	0.000904	0.00885	0.00058
	0.011949	0.001065	0.008891	0.000722
	0.011855	0.000883	0.008908	0.000597
	0.011798	0.000689	0.00888	0.000591
	0.011785	0.000705	0.008802	0.00073
	0.011801	0.000926	0.008745	0.000854
	0.011774	0.000739	0.008668	0.000666
	0.01165	0.000639	0.008599	0.000596
	0.011671	0.000574	0.008519	0.000662
	0.011666	0.000734	0.008484	0.000747
	0.011687	0.000752	0.00849	0.000707
	0.011639	0.000944	0.00849	0.000673
	0.011545	0.000842	0.008545	0.000613
	0.01144	0.000862	0.008606	0.000604
	0.011418	0.000818	0.008563	0.000553
	0.011372	0.000776	0.008485	0.000521
	0.011308	0.000616	0.008414	0.000463
	0.011248	0.000753	0.008404	0.000521
	0.01118	0.000766	0.008316	0.000553
	0.011159	0.00074	0.008198	0.000547
	0.011089	0.00069	0.008085	0.000529
	0.011023	0.000689	0.007945	0.000523
	0.010941	0.000701	0.007877	0.000567
	0.010871	0.000655	0.007801	0.000618
	0.0108	0.000735	0.007732	0.00056
	0.010745	0.000722	0.00773	0.000523
	0.010734	0.000587	0.007749	0.00051
	0.010749	0.000676	0.007771	0.000575
	0.010835	0.00062	0.007795	0.000487
	0.010797	0.000679	0.007799	0.000536
	0.010759	0.000542	0.007749	0.000536
	0.010721	0.000665	0.007665	0.000459
	0.010732	0.000745	0.007585	0.00048
	0.010776	0.000623	0.007469	0.000522
	0.010781	0.000724	0.007313	0.000543
	0.010741	0.000657	0.007236	0.000516
	0.010709	0.000664	0.007203	0.000552
	0.01067	0.000744	0.007189	0.000523
	0.010618	0.000784	0.007078	0.000532
	0.010587	0.000689	0.007033	0.000542
	0.010566	0.000782	0.007045	0.000541
	0.010565	0.000744	0.007094	0.000542
	0.010555	0.000739	0.007134	0.000659
	0.010509	0.000592	0.007158	0.000553
	0.010474	0.000655	0.007183	0.000655
	0.010395	0.000743	0.007188	0.000652
	0.010326	0.000895	0.007131	0.000621
	0.010254	0.000664	0.007054	0.000605
	0.010183	0.000692	0.007006	0.000495
	0.01012	0.000708	0.006945	0.000585
	0.010086	0.000686	0.006891	0.000658
	0.01007	0.000678	0.00687	0.00063
	0.010027	0.000665	0.006868	0.000607
	0.00999	0.000642	0.006893	0.000576
	0.009917	0.0007	0.00693	0.000538
	0.009853	0.000776	0.006976	0.000493
	0.009798	0.000721	0.006988	0.000493
	0.009753	0.000657	0.006978	0.000475
	0.009727	0.000689	0.00695	0.000513
	0.009731	0.000716	0.006997	0.000502
10	0.009724	0.000763	0.007028	0.000471

## Sheet: 4C - Power Spectra 4-10Hz - Odo
Time	Non Pressers - Odor	Non Pressers - Odor	Pressers - Odor	Pressers - Odor
	Time course	SEM	Time course	SEM
4	0.051447	0.005622	0.026145	0.002306
	0.051003	0.004025	0.026089	0.002079
	0.049751	0.005337	0.025968	0.002173
	0.049897	0.003868	0.025902	0.002212
	0.050762	0.005618	0.025875	0.002398
	0.050342	0.006384	0.025868	0.002374
	0.049661	0.006224	0.025812	0.002474
	0.049048	0.006979	0.025933	0.002859
	0.048155	0.006622	0.026053	0.002468
	0.04799	0.00597	0.026076	0.002406
	0.047764	0.004608	0.025989	0.002255
	0.047638	0.003853	0.025953	0.002047
	0.048245	0.002967	0.02611	0.001982
	0.048255	0.005449	0.026207	0.002365
	0.048489	0.007122	0.026283	0.002653
	0.048445	0.005718	0.026309	0.002217
	0.048459	0.005296	0.026383	0.002034
	0.047998	0.003812	0.026544	0.001857
	0.047533	0.003886	0.026545	0.002016
	0.046811	0.004944	0.026403	0.002305
	0.046392	0.004583	0.026196	0.002081
	0.046498	0.008484	0.025903	0.002863
	0.046894	0.007446	0.025649	0.002663
	0.046782	0.00411	0.025505	0.002216
	0.045693	0.004771	0.025392	0.002208
	0.044401	0.003686	0.025148	0.001943
	0.044107	0.005915	0.025044	0.002381
	0.044368	0.004109	0.024953	0.002291
	0.044225	0.005394	0.024777	0.002346
	0.044248	0.003777	0.024567	0.002027
	0.044351	0.003578	0.024402	0.002096
	0.044394	0.004226	0.024274	0.002801
	0.044226	0.00398	0.024221	0.002092
	0.044097	0.003395	0.024135	0.001907
	0.044388	0.003628	0.023874	0.00198
	0.044501	0.003742	0.023518	0.00211
	0.044581	0.005423	0.023293	0.002263
	0.04406	0.00559	0.023078	0.002116
	0.043576	0.003493	0.022651	0.001909
	0.044098	0.004191	0.022409	0.001867
	0.044759	0.005452	0.022289	0.001992
	0.044752	0.005126	0.022102	0.002124
	0.044931	0.004489	0.021987	0.002098
	0.044763	0.005091	0.02189	0.00223
	0.044619	0.005843	0.021732	0.00218
	0.0446	0.006672	0.021566	0.002444
	0.044803	0.006778	0.021453	0.002134
	0.044852	0.005391	0.021235	0.001983
	0.044471	0.003099	0.021119	0.001809
	0.044781	0.008908	0.020997	0.002691
	0.044721	0.007531	0.020978	0.002337
	0.044729	0.00415	0.021063	0.001975
	0.044746	0.005064	0.021181	0.00192
	0.044761	0.003136	0.021073	0.001762
	0.044662	0.002859	0.020884	0.001674
	0.044643	0.003165	0.020872	0.001949
	0.04471	0.003862	0.021003	0.001909
	0.044969	0.00432	0.020988	0.002013
	0.045277	0.004312	0.020974	0.002106
	0.045637	0.006297	0.020979	0.002252
	0.044671	0.005083	0.020904	0.002144
	0.04414	0.004718	0.020917	0.002238
	0.044467	0.004667	0.021042	0.002168
	0.044631	0.005985	0.020962	0.002208
	0.044738	0.008145	0.020924	0.002476
	0.045128	0.005989	0.021002	0.002102
	0.045571	0.005951	0.021021	0.002027
	0.04578	0.007187	0.020977	0.00225
	0.045698	0.00652	0.020965	0.002218
	0.046066	0.004857	0.020958	0.002042
	0.046273	0.003343	0.020983	0.001735
	0.046575	0.005295	0.020855	0.001991
	0.0464	0.005695	0.020719	0.002125
	0.046327	0.005669	0.020604	0.001999
	0.046256	0.004343	0.020505	0.00186
	0.046238	0.005763	0.020436	0.002162
	0.046225	0.006748	0.020454	0.002403
	0.045656	0.005746	0.020465	0.002407
	0.045065	0.003715	0.02059	0.001758
	0.044628	0.004576	0.020737	0.001921
	0.044439	0.006052	0.020792	0.002153
	0.044823	0.004522	0.020869	0.002124
	0.04502	0.003881	0.020942	0.001924
	0.044694	0.003371	0.020913	0.001889
	0.044063	0.003131	0.021005	0.001904
	0.043791	0.003967	0.020932	0.001897
	0.043643	0.004612	0.020841	0.002021
	0.043537	0.003377	0.020794	0.001934
	0.043212	0.004443	0.020811	0.001937
	0.043056	0.004474	0.020899	0.002295
	0.042575	0.00388	0.020986	0.002051
	0.042435	0.003782	0.02097	0.001999
	0.042307	0.004277	0.020952	0.002264
	0.042035	0.005052	0.020827	0.002042
	0.041763	0.004003	0.020663	0.002054
	0.041488	0.003578	0.020606	0.002036
	0.04083	0.004543	0.020603	0.002091
	0.040277	0.004257	0.020557	0.001866
	0.040426	0.002653	0.02042	0.001825
	0.040417	0.003057	0.020338	0.002493
	0.040329	0.002865	0.020205	0.002133
	0.040638	0.004354	0.020143	0.001988
	0.040519	0.005204	0.020083	0.002006
	0.040277	0.003649	0.020061	0.001796
	0.040131	0.003066	0.020023	0.001722
	0.040573	0.003014	0.020012	0.001967
	0.040744	0.002511	0.020067	0.001853
	0.040398	0.003048	0.020069	0.001839
	0.0401	0.00436	0.020035	0.002147
	0.040466	0.003184	0.020029	0.001801
	0.040904	0.002595	0.019965	0.001584
	0.040937	0.003904	0.019946	0.001817
	0.040582	0.002809	0.020085	0.001807
	0.040836	0.003603	0.020228	0.002196
	0.041392	0.003257	0.02036	0.001933
	0.041904	0.004349	0.020365	0.00203
	0.042273	0.003373	0.020332	0.001775
	0.042784	0.003666	0.020295	0.0018
	0.043102	0.004197	0.020256	0.002105
	0.042974	0.00463	0.02029	0.002167
	0.043188	0.005512	0.020232	0.002069
	0.043419	0.004009	0.02012	0.001949
	0.043015	0.003548	0.02	0.001879
	0.04282	0.00574	0.019964	0.002177
	0.042357	0.00534	0.01989	0.002082
	0.0418	0.004591	0.019881	0.002041
	0.041482	0.004936	0.019931	0.001885
	0.041567	0.005282	0.020036	0.001963
	0.041657	0.005894	0.020105	0.002028
	0.041663	0.00413	0.020135	0.001947
	0.041168	0.004471	0.020153	0.001858
5	0.040654	0.00551	0.020171	0.002135
	0.040541	0.003409	0.020077	0.001686
	0.040484	0.003423	0.019909	0.001724
	0.039742	0.002423	0.019744	0.00179
	0.039447	0.003116	0.019711	0.001726
	0.038956	0.005131	0.019798	0.002009
	0.038548	0.004337	0.019863	0.002169
	0.038357	0.002536	0.019998	0.001861
	0.038078	0.003361	0.020046	0.001823
	0.038321	0.002849	0.020123	0.001914
	0.03863	0.003415	0.020173	0.001887
	0.039033	0.003639	0.020382	0.001905
	0.039204	0.004383	0.020644	0.002012
	0.039277	0.003422	0.020707	0.001882
	0.039484	0.004146	0.0207	0.002164
	0.039527	0.002955	0.020675	0.002115
	0.039174	0.003388	0.020626	0.002145
	0.039108	0.005167	0.020524	0.002435
	0.039425	0.004273	0.020493	0.00244
	0.039501	0.004817	0.020551	0.002317
	0.03961	0.00543	0.020428	0.002312
	0.039602	0.005628	0.020329	0.002457
	0.039705	0.004634	0.020233	0.0022
	0.039617	0.003858	0.020152	0.001915
	0.039903	0.003633	0.020191	0.001802
	0.040117	0.00249	0.020117	0.001634
	0.040552	0.003502	0.020092	0.001903
	0.040737	0.004857	0.020145	0.002255
	0.040424	0.005264	0.019986	0.00234
	0.04048	0.004143	0.019917	0.002019
	0.040305	0.004427	0.019727	0.001809
	0.039864	0.003882	0.01967	0.001986
	0.039271	0.004606	0.019455	0.001786
	0.039164	0.003997	0.019297	0.001844
	0.039155	0.004002	0.019179	0.001939
	0.039515	0.004748	0.019095	0.002119
	0.039922	0.005037	0.019105	0.002088
	0.039825	0.004227	0.019165	0.002139
	0.039514	0.003345	0.019228	0.002099
	0.03903	0.004032	0.019172	0.002081
	0.038811	0.004497	0.019104	0.002063
	0.039033	0.005408	0.019168	0.002213
	0.039013	0.00472	0.019211	0.001871
	0.03911	0.005126	0.01945	0.002003
	0.039533	0.004648	0.019575	0.001886
	0.039607	0.005559	0.019559	0.001955
	0.038939	0.004468	0.019543	0.0019
	0.038512	0.00389	0.019479	0.001983
	0.038111	0.005027	0.019413	0.002179
	0.038121	0.004392	0.019676	0.001972
	0.03811	0.003382	0.019903	0.001793
	0.038113	0.005083	0.019979	0.00201
	0.037865	0.004621	0.020073	0.002002
	0.037589	0.006836	0.020298	0.002527
	0.037386	0.006713	0.020426	0.002321
	0.037384	0.005379	0.020435	0.002071
	0.036857	0.004728	0.020425	0.001844
	0.036532	0.00578	0.020423	0.002088
	0.036715	0.004857	0.020381	0.001962
	0.036648	0.004131	0.020325	0.002662
	0.036556	0.005165	0.020295	0.002868
	0.036283	0.005821	0.020232	0.002169
	0.035824	0.003912	0.020245	0.001813
	0.036284	0.003509	0.020288	0.001786
	0.036636	0.003762	0.020334	0.001735
	0.036367	0.004342	0.020409	0.001784
	0.035936	0.003696	0.020499	0.001815
	0.036022	0.003595	0.020536	0.001816
	0.035773	0.003861	0.020606	0.001985
	0.03562	0.003667	0.020539	0.001856
	0.03587	0.003655	0.020331	0.001709
	0.036145	0.003532	0.020126	0.001821
	0.035925	0.003762	0.020159	0.002158
	0.035839	0.005731	0.02016	0.00238
	0.036098	0.007161	0.019934	0.002544
	0.036471	0.00517	0.019814	0.002169
	0.036153	0.003691	0.019893	0.001869
	0.035904	0.004812	0.020089	0.00176
	0.035894	0.003709	0.020335	0.001711
	0.036068	0.00283	0.02044	0.001689
	0.036416	0.00515	0.020488	0.001996
	0.036525	0.007097	0.020608	0.002245
	0.037046	0.003776	0.02066	0.0017
	0.037209	0.003894	0.020626	0.001853
	0.03679	0.004393	0.020562	0.001884
	0.036483	0.005942	0.020389	0.002256
	0.036139	0.004231	0.020194	0.002098
	0.036195	0.00302	0.020171	0.00207
	0.036326	0.003572	0.020221	0.00227
	0.036378	0.004491	0.020269	0.002418
	0.036676	0.005094	0.02041	0.002288
	0.036511	0.004794	0.020426	0.00204
	0.036224	0.004932	0.020599	0.002056
	0.036501	0.003892	0.02059	0.002009
	0.036453	0.003653	0.020496	0.002049
	0.036442	0.004991	0.020539	0.002354
	0.036167	0.003629	0.020663	0.001895
	0.036318	0.003988	0.020782	0.002016
	0.036697	0.005641	0.020794	0.00225
	0.036955	0.004556	0.020772	0.002319
	0.036894	0.005808	0.020708	0.002417
	0.037004	0.004213	0.020638	0.002225
	0.037286	0.005885	0.020628	0.002411
	0.037365	0.005524	0.020694	0.002209
	0.037286	0.004163	0.020904	0.002123
	0.037469	0.004761	0.021108	0.002192
	0.037056	0.004618	0.02132	0.002517
	0.036982	0.004543	0.021401	0.002489
	0.03708	0.004374	0.021276	0.002361
	0.036721	0.005658	0.021149	0.002915
	0.036602	0.007217	0.02098	0.00261
	0.036735	0.007214	0.020911	0.002557
	0.036919	0.005616	0.020886	0.002432
	0.036964	0.005018	0.020761	0.002281
	0.03688	0.003958	0.020744	0.002421
	0.037582	0.005199	0.020721	0.002302
	0.037674	0.005103	0.020827	0.002371
	0.037661	0.004067	0.020846	0.001961
	0.037339	0.004283	0.020567	0.001909
	0.037444	0.003676	0.020294	0.002156
	0.037398	0.003758	0.019968	0.00207
	0.037181	0.004621	0.019877	0.002362
	0.036889	0.00447	0.019935	0.002379
	0.036398	0.005133	0.01987	0.002551
	0.035705	0.004542	0.019707	0.002227
	0.035825	0.008295	0.019386	0.002645
	0.035538	0.006417	0.01911	0.002947
	0.035339	0.004799	0.018789	0.002921
	0.035564	0.003592	0.018718	0.002345
	0.035339	0.005219	0.018644	0.002379
	0.035666	0.005933	0.01864	0.002633
6	0.036313	0.00432	0.018661	0.002537
	0.036525	0.004885	0.018547	0.002474
	0.036633	0.003535	0.01843	0.002093
	0.036806	0.00299	0.01825	0.002094
	0.036738	0.005494	0.018005	0.002093
	0.036079	0.004106	0.017929	0.00215
	0.035753	0.003177	0.017826	0.002047
	0.03561	0.004117	0.017659	0.002174
	0.036101	0.003238	0.017789	0.002122
	0.036094	0.003971	0.01797	0.002121
	0.035947	0.006288	0.017983	0.002339
	0.035725	0.005933	0.017966	0.002323
	0.035922	0.006015	0.017843	0.002236
	0.036489	0.006653	0.01786	0.002282
	0.03694	0.005	0.017875	0.002122
	0.036893	0.005119	0.017925	0.002234
	0.036935	0.004931	0.018049	0.002276
	0.036999	0.004637	0.018064	0.002133
	0.036828	0.004796	0.017939	0.002076
	0.037085	0.005408	0.018011	0.002331
	0.037067	0.004087	0.018046	0.002256
	0.036928	0.003477	0.017979	0.002446
	0.036785	0.00637	0.018042	0.002512
	0.036273	0.007515	0.018168	0.002637
	0.035675	0.006931	0.018289	0.002388
	0.035604	0.005487	0.01855	0.002193
	0.035931	0.005192	0.018647	0.002467
	0.03594	0.004924	0.018628	0.002163
	0.0358	0.004702	0.018718	0.001943
	0.0358	0.005176	0.01888	0.002353
	0.035635	0.005851	0.018934	0.002529
	0.035244	0.007022	0.019022	0.002547
	0.0354	0.007395	0.019013	0.002422
	0.034888	0.00501	0.019035	0.002073
	0.034731	0.004328	0.019076	0.002067
	0.034755	0.00518	0.019171	0.002333
	0.034794	0.007289	0.019342	0.002593
	0.035141	0.004684	0.019446	0.00237
	0.035201	0.004854	0.019548	0.00265
	0.035298	0.008105	0.01974	0.002777
	0.035597	0.006766	0.019863	0.002412
	0.035861	0.005126	0.01995	0.002077
	0.035414	0.006728	0.020153	0.00231
	0.035289	0.005836	0.020194	0.002387
	0.035342	0.007102	0.020104	0.002515
	0.035336	0.006348	0.019938	0.002519
	0.035215	0.005676	0.019968	0.002812
	0.035068	0.005896	0.020088	0.002618
	0.03514	0.004894	0.02022	0.002433
	0.035354	0.005349	0.020332	0.002872
	0.035075	0.006125	0.020368	0.002462
	0.035054	0.006353	0.020475	0.002547
	0.035461	0.005866	0.020687	0.002515
	0.035274	0.007896	0.020929	0.002593
	0.035367	0.007465	0.021094	0.002519
	0.035383	0.00699	0.021051	0.002277
	0.035306	0.007343	0.021115	0.003126
	0.03523	0.007224	0.021149	0.002921
	0.034732	0.006327	0.021123	0.002558
	0.034801	0.005396	0.021184	0.002668
	0.035067	0.004657	0.021047	0.002545
	0.034789	0.005197	0.020878	0.00274
	0.03465	0.005553	0.020888	0.002923
	0.035131	0.004343	0.020967	0.002718
	0.035267	0.005173	0.021064	0.002471
	0.035247	0.007053	0.021253	0.002477
	0.035093	0.005937	0.021691	0.00241
	0.035032	0.005271	0.021875	0.002362
	0.034998	0.004423	0.021984	0.002165
	0.035604	0.00546	0.022089	0.00226
	0.036525	0.006302	0.022133	0.002259
	0.036925	0.005043	0.022267	0.002145
	0.037188	0.006366	0.022312	0.00238
	0.037656	0.007837	0.022291	0.0028
	0.038014	0.006066	0.022222	0.002922
	0.037934	0.00542	0.022222	0.002859
	0.038092	0.005566	0.022506	0.002866
	0.038461	0.006032	0.022611	0.002705
	0.038938	0.006727	0.022569	0.002994
	0.039095	0.008677	0.022504	0.003187
	0.039305	0.011491	0.022444	0.003633
	0.039054	0.007217	0.022825	0.003064
	0.039001	0.006706	0.023145	0.003016
	0.039408	0.008826	0.023222	0.003346
	0.039588	0.006846	0.023361	0.003348
	0.039273	0.005372	0.023634	0.002596
	0.039264	0.008905	0.02381	0.003253
	0.039875	0.007648	0.023768	0.002666
	0.040667	0.006848	0.023671	0.002682
	0.041093	0.006567	0.02371	0.002652
	0.041064	0.007959	0.023701	0.002665
	0.040369	0.007011	0.023659	0.003289
	0.040107	0.006698	0.023509	0.002829
	0.04028	0.009025	0.023424	0.002943
	0.040346	0.009491	0.023343	0.003292
	0.040223	0.005342	0.023455	0.00345
	0.040242	0.004799	0.023568	0.003521
	0.039848	0.007303	0.023414	0.003297
	0.039182	0.010928	0.023326	0.003348
	0.03902	0.008497	0.023405	0.003124
	0.039609	0.007366	0.023618	0.002883
	0.039982	0.00603	0.023764	0.002706
	0.040361	0.006342	0.023693	0.002805
	0.040573	0.007694	0.023597	0.003018
	0.039923	0.008213	0.023477	0.00286
	0.039568	0.006176	0.023224	0.00284
	0.03999	0.006271	0.023054	0.002876
	0.040403	0.005509	0.023022	0.002859
	0.040483	0.005071	0.022829	0.002721
	0.040236	0.007099	0.022755	0.002941
	0.039826	0.010528	0.022542	0.003209
	0.039429	0.011247	0.022597	0.003434
	0.039658	0.008372	0.022865	0.003156
	0.039728	0.006442	0.023083	0.002735
	0.039248	0.004957	0.023186	0.002462
	0.038769	0.006736	0.023306	0.002576
	0.038796	0.007213	0.023283	0.002864
	0.03916	0.007051	0.023277	0.003306
	0.039611	0.007453	0.023415	0.003169
	0.040119	0.008942	0.023673	0.003409
	0.03979	0.006259	0.023935	0.002735
	0.039388	0.006508	0.024257	0.003286
	0.039202	0.007898	0.024382	0.003424
	0.03911	0.00651	0.024433	0.003238
	0.039126	0.005319	0.024538	0.002761
	0.039903	0.005213	0.024864	0.003198
	0.040209	0.00542	0.025187	0.003008
	0.03984	0.006068	0.025357	0.003452
	0.03921	0.00968	0.025294	0.003858
	0.038848	0.007766	0.025512	0.003707
	0.038863	0.006081	0.025747	0.003939
7	0.039158	0.006745	0.02609	0.004034
	0.039121	0.00784	0.026176	0.003614
	0.038959	0.006847	0.025971	0.003523
	0.03918	0.006998	0.025795	0.003071
	0.03951	0.007896	0.025736	0.003851
	0.039489	0.008702	0.025741	0.004149
	0.039541	0.006795	0.02564	0.003599
	0.039462	0.007603	0.025512	0.003045
	0.039125	0.0083	0.025583	0.003262
	0.038792	0.010181	0.025663	0.003523
	0.039286	0.010493	0.025724	0.003497
	0.039137	0.008926	0.025701	0.003308
	0.039138	0.008242	0.025797	0.00319
	0.039334	0.008713	0.025772	0.00312
	0.039594	0.008399	0.025808	0.00304
	0.039191	0.007157	0.025633	0.002942
	0.038954	0.007712	0.025563	0.00288
	0.039203	0.007932	0.025428	0.002882
	0.040132	0.007837	0.025562	0.003073
	0.040411	0.008033	0.025781	0.003619
	0.040219	0.010713	0.025928	0.004099
	0.039685	0.007591	0.025943	0.004066
	0.039543	0.008062	0.025899	0.003553
	0.039532	0.008263	0.025973	0.003254
	0.039331	0.009461	0.026019	0.003313
	0.039161	0.009111	0.026086	0.00309
	0.039351	0.007871	0.026244	0.003138
	0.039777	0.007943	0.026466	0.003154
	0.040069	0.009016	0.02665	0.003418
	0.040203	0.007928	0.026801	0.003955
	0.040988	0.010289	0.026708	0.003694
	0.040943	0.009322	0.026532	0.003297
	0.041562	0.008362	0.026308	0.002904
	0.041304	0.008129	0.026113	0.003167
	0.041021	0.007266	0.02623	0.002763
	0.040808	0.005911	0.026435	0.002715
	0.040371	0.008627	0.026705	0.003718
	0.04019	0.010762	0.026768	0.0037
	0.040769	0.009352	0.026866	0.003253
	0.04104	0.007964	0.02695	0.003509
	0.04156	0.010454	0.026969	0.003465
	0.041743	0.011105	0.027094	0.003506
	0.042444	0.01373	0.027032	0.003805
	0.043036	0.009927	0.027315	0.003118
	0.043099	0.009193	0.027448	0.003181
	0.042957	0.011319	0.027518	0.003634
	0.042926	0.009451	0.027559	0.003364
	0.043044	0.008287	0.027538	0.003333
	0.043358	0.013275	0.027603	0.004026
	0.043337	0.01337	0.027611	0.004024
	0.043015	0.011702	0.027458	0.003921
	0.042617	0.010469	0.027535	0.00392
	0.042529	0.012399	0.027545	0.003734
	0.042003	0.011992	0.027565	0.004176
	0.041916	0.011155	0.027662	0.003709
	0.042121	0.010768	0.027673	0.003482
	0.041956	0.010545	0.027655	0.003572
	0.042193	0.011736	0.027875	0.003544
	0.042105	0.011246	0.028028	0.003632
	0.041634	0.009292	0.028105	0.003327
	0.041387	0.009084	0.028299	0.003257
	0.040993	0.009241	0.02842	0.003382
	0.040886	0.009644	0.028354	0.003409
	0.040563	0.009928	0.028481	0.003306
	0.040123	0.009676	0.028418	0.003255
	0.04031	0.011099	0.028611	0.003638
	0.040697	0.010454	0.028798	0.003903
	0.040935	0.010787	0.028992	0.004422
	0.041088	0.010917	0.028992	0.003852
	0.040742	0.011179	0.02877	0.003798
	0.040815	0.012901	0.028962	0.003983
	0.041283	0.011056	0.029047	0.003911
	0.041306	0.009603	0.02891	0.003924
	0.041144	0.010483	0.029003	0.003967
	0.041381	0.011281	0.02912	0.003876
	0.041376	0.010975	0.029488	0.003833
	0.040953	0.012042	0.029691	0.00374
	0.040811	0.01196	0.029734	0.003865
	0.040572	0.013204	0.029479	0.003815
	0.040863	0.010557	0.029284	0.003425
	0.040282	0.010229	0.029242	0.003672
	0.039358	0.009313	0.028962	0.003278
	0.038836	0.008278	0.028765	0.002891
	0.039217	0.008086	0.028726	0.003075
	0.039531	0.007679	0.028846	0.003079
	0.039656	0.006975	0.02876	0.003199
	0.039285	0.007791	0.028359	0.003025
	0.039248	0.008374	0.027916	0.002954
	0.03913	0.009921	0.027564	0.00319
	0.038577	0.010316	0.02747	0.003409
	0.038165	0.009786	0.027753	0.003586
	0.037817	0.010292	0.027729	0.00317
	0.037526	0.010224	0.027694	0.003316
	0.037155	0.009828	0.027888	0.003756
	0.037177	0.009655	0.028016	0.003827
	0.037044	0.009867	0.028144	0.003706
	0.036997	0.010096	0.028193	0.003685
	0.037251	0.010165	0.028097	0.003053
	0.037911	0.010216	0.02791	0.003214
	0.038554	0.008932	0.027878	0.003688
	0.038738	0.010591	0.027848	0.004139
	0.039319	0.009793	0.027671	0.003594
	0.040012	0.008816	0.02764	0.003132
	0.040377	0.007297	0.027552	0.002945
	0.039716	0.007419	0.027568	0.003155
	0.03954	0.007433	0.027302	0.003437
	0.039431	0.006377	0.027369	0.003838
	0.040051	0.007505	0.027263	0.003318
	0.040274	0.007347	0.027459	0.002903
	0.040252	0.008156	0.027657	0.003269
	0.040619	0.008558	0.027803	0.003135
	0.040736	0.008215	0.027876	0.002771
	0.040577	0.008791	0.027944	0.003082
	0.040516	0.008752	0.028017	0.002912
	0.040701	0.008204	0.027913	0.003188
	0.04054	0.009154	0.027713	0.00316
	0.040272	0.007873	0.027447	0.003505
	0.040146	0.008668	0.027053	0.003038
	0.039772	0.008566	0.026982	0.003071
	0.039193	0.006349	0.027122	0.002972
	0.038515	0.007581	0.027088	0.003304
	0.037883	0.007992	0.027359	0.00359
	0.03743	0.006199	0.027686	0.003376
	0.037065	0.005761	0.027764	0.003176
	0.036812	0.006234	0.027839	0.003023
	0.036758	0.006284	0.027775	0.003266
	0.036399	0.005482	0.027888	0.003605
	0.036588	0.00585	0.027735	0.003128
	0.035709	0.005943	0.027916	0.003248
	0.034741	0.006295	0.027985	0.0032
	0.034599	0.006387	0.02784	0.003174
8	0.034416	0.005995	0.027731	0.003709
	0.034294	0.00651	0.027501	0.003714
	0.03404	0.006472	0.027275	0.003037
	0.033627	0.006421	0.027205	0.003035
	0.032956	0.007415	0.027132	0.003205
	0.032534	0.007677	0.02703	0.003135
	0.032305	0.008336	0.027087	0.003524
	0.032072	0.007391	0.027093	0.002803
	0.032018	0.006965	0.026986	0.003128
	0.032076	0.006921	0.026742	0.002691
	0.032342	0.007515	0.026692	0.002974
	0.032281	0.006052	0.026502	0.003071
	0.032053	0.005889	0.026326	0.002715
	0.031818	0.006282	0.026131	0.002705
	0.031748	0.006253	0.025814	0.002637
	0.031626	0.006655	0.025499	0.002853
	0.031419	0.00587	0.025198	0.002635
	0.030898	0.006562	0.02515	0.002828
	0.030887	0.006666	0.024912	0.002665
	0.031071	0.006896	0.024723	0.002727
	0.03077	0.006383	0.024755	0.002899
	0.030259	0.005315	0.024679	0.002706
	0.029754	0.005098	0.024517	0.002848
	0.029565	0.005572	0.024516	0.002985
	0.029451	0.005768	0.02443	0.002566
	0.029604	0.005074	0.024278	0.002486
	0.029455	0.00447	0.024156	0.002608
	0.029258	0.004745	0.023828	0.003715
	0.02931	0.005035	0.023594	0.002571
	0.029195	0.005275	0.023413	0.002797
	0.028731	0.005832	0.023261	0.002935
	0.028078	0.005192	0.023104	0.002897
	0.027893	0.005035	0.022834	0.002669
	0.02804	0.004558	0.022597	0.002932
	0.02806	0.004314	0.022584	0.00293
	0.02791	0.004744	0.022708	0.002276
	0.027888	0.004994	0.022713	0.002208
	0.027843	0.004823	0.022696	0.002201
	0.027546	0.005418	0.02244	0.0022
	0.027241	0.006263	0.022446	0.002293
	0.027198	0.004745	0.022299	0.002163
	0.027054	0.004127	0.022064	0.002044
	0.027147	0.004595	0.021806	0.002229
	0.027465	0.00538	0.021621	0.002313
	0.027482	0.00579	0.021332	0.002641
	0.027514	0.005355	0.021293	0.003034
	0.027706	0.005457	0.021418	0.002492
	0.027994	0.00562	0.021379	0.002375
	0.028144	0.00536	0.021331	0.002135
	0.027811	0.004856	0.021291	0.001983
	0.027543	0.00585	0.021291	0.002347
	0.027485	0.004413	0.021281	0.002261
	0.027497	0.004601	0.021221	0.002322
	0.027248	0.005413	0.021181	0.002293
	0.027025	0.005063	0.021122	0.002049
	0.026985	0.004846	0.020922	0.002749
	0.026618	0.005431	0.020756	0.002973
	0.026147	0.004537	0.020684	0.002178
	0.025669	0.004081	0.020622	0.002005
	0.025298	0.003882	0.020572	0.002017
	0.0251	0.004324	0.020548	0.002216
	0.024844	0.005083	0.020542	0.002013
	0.024674	0.004066	0.020481	0.001887
	0.024237	0.003945	0.020467	0.001899
	0.023599	0.004207	0.020424	0.001934
	0.023442	0.004612	0.020321	0.002091
	0.023123	0.004237	0.020016	0.00215
	0.022477	0.004228	0.019722	0.002001
	0.021947	0.004057	0.019568	0.002272
	0.021417	0.003276	0.019395	0.001978
	0.021355	0.003629	0.019151	0.001949
	0.021298	0.003674	0.018848	0.001836
	0.020961	0.003628	0.018631	0.001644
	0.020917	0.004053	0.018376	0.001836
	0.020965	0.003346	0.018154	0.001863
	0.020733	0.00388	0.018002	0.002057
	0.020202	0.003195	0.017936	0.001725
	0.020014	0.003363	0.017764	0.001821
	0.020008	0.003902	0.017627	0.001605
	0.020083	0.003322	0.017502	0.001503
	0.020406	0.003025	0.017383	0.001525
	0.020444	0.003231	0.017218	0.001544
	0.020297	0.002814	0.017119	0.001527
	0.020211	0.003305	0.01704	0.001572
	0.020265	0.00282	0.0169	0.001571
	0.020416	0.002797	0.016743	0.001566
	0.020162	0.003176	0.016671	0.001755
	0.020036	0.00359	0.016751	0.001655
	0.01995	0.002862	0.016676	0.001567
	0.019844	0.003307	0.016519	0.001696
	0.01994	0.00422	0.01644	0.001686
	0.020005	0.004319	0.016486	0.001683
	0.01986	0.003281	0.016532	0.001789
	0.019874	0.002722	0.016535	0.001705
	0.019711	0.003131	0.016461	0.001564
	0.019443	0.003244	0.016422	0.001535
	0.019209	0.003048	0.016392	0.001511
	0.019162	0.003004	0.016392	0.001729
	0.019194	0.0028	0.016408	0.001509
	0.019009	0.002723	0.016331	0.00131
	0.018819	0.002676	0.016242	0.001372
	0.018509	0.003104	0.016079	0.001548
	0.018198	0.002829	0.015896	0.001564
	0.017964	0.002862	0.015711	0.001381
	0.017849	0.002989	0.01554	0.001483
	0.017593	0.0027	0.015424	0.001353
	0.017401	0.002438	0.015246	0.001468
	0.017303	0.002096	0.015088	0.001708
	0.017382	0.002114	0.014748	0.001423
	0.017482	0.001757	0.014649	0.001271
	0.017485	0.002247	0.014728	0.001377
	0.017394	0.002104	0.014784	0.001299
	0.017146	0.002406	0.01475	0.001237
	0.017054	0.002294	0.014683	0.001309
	0.017155	0.00243	0.014621	0.001283
	0.017127	0.002824	0.014594	0.00124
	0.017181	0.002627	0.014513	0.001072
	0.017158	0.002081	0.014303	0.00114
	0.016957	0.002283	0.014036	0.001257
	0.016808	0.002382	0.013829	0.001355
	0.016812	0.001827	0.013736	0.0012
	0.016837	0.001922	0.01358	0.001131
	0.016776	0.002011	0.01361	0.001295
	0.0168	0.002001	0.013672	0.001333
	0.016796	0.002653	0.013635	0.001482
	0.016723	0.002075	0.013663	0.001386
	0.016789	0.002248	0.01365	0.001227
	0.016764	0.001765	0.013743	0.001105
	0.016839	0.001646	0.013752	0.001165
	0.016792	0.001947	0.013755	0.001111
	0.016662	0.002683	0.013583	0.001257
9	0.016658	0.002736	0.013347	0.001178
	0.01648	0.002317	0.013124	0.001154
	0.01634	0.002501	0.012863	0.001122
	0.01626	0.001806	0.012648	0.000995
	0.015895	0.001978	0.012528	0.001211
	0.015633	0.002294	0.012453	0.001132
	0.01553	0.002297	0.012336	0.001057
	0.015563	0.002378	0.012289	0.00114
	0.015682	0.002261	0.012285	0.00123
	0.015772	0.001928	0.012248	0.001083
	0.015776	0.001839	0.012182	0.000997
	0.015646	0.001993	0.01221	0.000965
	0.015605	0.002106	0.012073	0.000954
	0.015428	0.002271	0.011908	0.001164
	0.015272	0.001999	0.0119	0.001207
	0.015192	0.001688	0.011795	0.001242
	0.015078	0.001827	0.011668	0.000948
	0.01483	0.00226	0.011569	0.0009
	0.014606	0.002141	0.011505	0.001031
	0.014385	0.002627	0.011462	0.001352
	0.014234	0.00256	0.011518	0.001217
	0.014082	0.0018	0.011562	0.0012
	0.014127	0.001761	0.011646	0.000927
	0.014161	0.001373	0.011677	0.000804
	0.014023	0.001396	0.01173	0.00096
	0.013874	0.001701	0.011649	0.000984
	0.013747	0.002003	0.011612	0.000924
	0.01361	0.00189	0.011634	0.000875
	0.013532	0.001563	0.011642	0.000814
	0.013443	0.001566	0.01165	0.000762
	0.013343	0.001591	0.011636	0.000864
	0.013148	0.001537	0.011546	0.000868
	0.013083	0.001497	0.011447	0.001054
	0.013026	0.001568	0.011404	0.000808
	0.013144	0.001293	0.011392	0.000705
	0.013164	0.001424	0.011368	0.000653
	0.013061	0.001178	0.011347	0.000736
	0.012881	0.0011	0.011334	0.000848
	0.012853	0.001625	0.011365	0.000852
	0.012829	0.001804	0.011349	0.000957
	0.012796	0.002269	0.0113	0.000873
	0.01275	0.001723	0.01117	0.000859
	0.012721	0.00153	0.011046	0.000887
	0.012798	0.001671	0.010888	0.000717
	0.012866	0.001725	0.01081	0.00081
	0.012866	0.001415	0.01071	0.00092
	0.01291	0.001214	0.010678	0.000774
	0.013015	0.00125	0.010624	0.000719
	0.012979	0.001177	0.01062	0.000784
	0.012881	0.001502	0.010581	0.000796
	0.012906	0.001622	0.010462	0.000912
	0.012794	0.001377	0.01041	0.000809
	0.012746	0.001456	0.010508	0.000722
	0.012647	0.002114	0.010501	0.000774
	0.012497	0.002058	0.010535	0.000769
	0.012277	0.001446	0.010561	0.000706
	0.012219	0.001571	0.010451	0.000754
	0.012298	0.001699	0.010345	0.000844
	0.012377	0.001673	0.010274	0.000919
	0.012393	0.001638	0.010159	0.000863
	0.012403	0.001485	0.010025	0.000734
	0.012342	0.001465	0.009977	0.000771
	0.012327	0.00161	0.009983	0.001019
	0.012297	0.001485	0.009978	0.000832
	0.012164	0.00132	0.010056	0.000735
	0.012136	0.001252	0.010143	0.000718
	0.012157	0.001443	0.010146	0.000702
	0.012169	0.001676	0.010074	0.000727
	0.012044	0.001657	0.009988	0.000685
	0.011981	0.001464	0.00986	0.000669
	0.011921	0.001508	0.009775	0.000621
	0.011782	0.001394	0.009718	0.000936
	0.011625	0.001057	0.009629	0.000701
	0.01154	0.000918	0.009447	0.000602
	0.011458	0.001064	0.009328	0.00079
	0.011375	0.001675	0.009224	0.001052
	0.011397	0.001103	0.009071	0.000783
	0.011448	0.000946	0.008982	0.000609
	0.011396	0.0009	0.008979	0.000529
	0.011281	0.00113	0.008956	0.000579
	0.011147	0.00128	0.008838	0.000677
	0.011064	0.001575	0.008789	0.000754
	0.011029	0.001067	0.008691	0.000689
	0.011026	0.001051	0.008576	0.000696
	0.010957	0.001128	0.008506	0.00065
	0.010861	0.001017	0.008388	0.000615
	0.010729	0.000725	0.008234	0.000528
	0.010677	0.000976	0.008144	0.000622
	0.01064	0.001143	0.008116	0.000671
	0.01064	0.001159	0.008088	0.000584
	0.010585	0.001153	0.008053	0.000537
	0.010539	0.001193	0.007976	0.000598
	0.01046	0.001081	0.00793	0.000594
	0.010464	0.001094	0.007929	0.000554
	0.010547	0.00115	0.007898	0.000567
	0.010598	0.001139	0.007857	0.000577
	0.010628	0.001023	0.007828	0.000551
	0.010685	0.001111	0.007828	0.000532
	0.010676	0.000939	0.007859	0.000555
	0.01062	0.000983	0.007853	0.000623
	0.010596	0.000892	0.007804	0.000627
	0.010624	0.001214	0.007872	0.000535
	0.010712	0.001144	0.007937	0.000536
	0.010725	0.001024	0.007949	0.000622
	0.010692	0.001064	0.00803	0.000657
	0.010677	0.000877	0.008121	0.000583
	0.010786	0.000965	0.008182	0.000627
	0.010782	0.001294	0.00823	0.000592
	0.010698	0.001292	0.008228	0.000634
	0.010706	0.001102	0.008279	0.000644
	0.010714	0.001136	0.008358	0.000618
	0.010716	0.001142	0.008377	0.00068
	0.01069	0.001269	0.00843	0.000857
	0.01069	0.001038	0.008484	0.00071
	0.010694	0.001076	0.008477	0.000859
	0.010565	0.001185	0.008431	0.00082
	0.010533	0.001563	0.008445	0.00071
	0.01055	0.001107	0.008441	0.000628
	0.010533	0.001146	0.008458	0.000577
	0.010444	0.001148	0.008455	0.00068
	0.010284	0.000981	0.008406	0.000763
	0.010317	0.001029	0.00846	0.000636
	0.010347	0.001126	0.008467	0.000694
	0.010245	0.001184	0.008441	0.00059
	0.010221	0.001055	0.008459	0.000566
	0.010188	0.00124	0.008416	0.000539
	0.010178	0.001117	0.008344	0.000582
	0.009984	0.001129	0.00828	0.000531
	0.009882	0.001229	0.008231	0.000588
	0.009903	0.001182	0.008276	0.000601
10	0.009777	0.001248	0.008231	0.00056
