# Supplementary material for: Neural correlates and determinants of approach–avoidance conflict in the prelimbic prefrontal cortex
Source: eLife. 2021 Dec 16;10:e74950. doi: 10.7554/eLife.74950 (PMC8853658; doi:10.7554/eLife.74950)
Supplement: Figure 5—figure supplement 1—source data 1. [file elife-74950-fig5-figsupp1-data1.xlsx]

## Sheet: B - % labeled cells
	DLX also GAD67	GAD67 also DLX
9T3	94.2029	87.8378
2U3	83.5165	85.3933
1U3	87.037	70.1492

## Sheet: B - RNAscope colabel GAD6
	DLX also GAD67	GAD67 also DLX
9T3	94.2029	87.8378
2U3	83.5165	85.3933
1U3	87.037	70.1492
