# Supplementary material for: Neural correlates and determinants of approach–avoidance conflict in the prelimbic prefrontal cortex
Source: eLife. 2021 Dec 16;10:e74950. doi: 10.7554/eLife.74950 (PMC8853658; doi:10.7554/eLife.74950)
Supplement: Figure 5—figure supplement 2—source data 1. [file elife-74950-fig5-figsupp2-data1.xlsx]

## Sheet: B,E -  Baseline Effects F
FOOD SEEKING EFFECT
	%	#
E	0.14	5
I	0.29	10
N	0.57	20
E->E	0	0
E-->I	0.2	1
E->N	0.8	4
I->E	0.5	5
I->I	0	0
I->N	0.5	5
N->E	0.2	4
N->I	0.1	2
N->N	0.7	14
CONDITIONED ODOR EFFECT
	%	#
E	0.26	9
I	0.09	3
N	0.66	23
E->E	0.22	2
E-->I	0.56	5
E->N	0.22	2
I->E	0.33	1
I->I	0.33	1
I->N	0.33	1
N->E	0.22	5
N->I	0.35	8
N->N	0.43	10

## Sheet: C,F -  Baseline Effects F
FOOD SEEKING EFFECT
	%	#
E	0.25	17
I	0.29	20
N	0.46	32
E->E	0.18	3
E-->I	0.59	10
E->N	0.41	7
I->E	0.35	7
I->I	0.15	3
I->N	0.35	7
N->E	0.19	6
N->I	0.22	7
N->N	0.59	19
CONDITIONED ODOR EFFECT
	%	#
E	0.23	16
I	0.29	20
N	0.48	33
E->E	0.19	3
E-->I	0.31	5
E->N	0.5	8
I->E	0.2	4
I->I	0.25	5
I->N	0.55	11
N->E	0.21	7
N->I	0.24	8
N->N	0.55	18
