# Supplementary material for: Neural correlates and determinants of approach–avoidance conflict in the prelimbic prefrontal cortex
Source: eLife. 2021 Dec 16;10:e74950. doi: 10.7554/eLife.74950 (PMC8853658; doi:10.7554/eLife.74950)
Supplement: Figure 5—figure supplement 3—source data 1. [file elife-74950-fig5-figsupp3-data1.xlsx]

## Sheet: A - Freezing % changes
	Excited	Inhibited	No Changes
Odor + Conflict (PLGLUT)	0	5.55556	94.4444
Odor + Conflict (PLGABA)	4.34783	1.44928	94.2029

## Sheet: B - Avoidance % changes
	Excited	Inhibited	No Changes
Odor + Conflict (PLGLUT)	2.77778	8.33333	88.8889
Odor + Conflict (PLGABA)	5.7971	8.69565	85.5072

## Sheet: C - Risk Assess % changes
	Excited	Inhibited	No Changes
Odor + Conflict (PLGLUT)	0	0	100
Odor + Conflict (PLGABA)	8.69565	1.44928	89.8551

## Sheet: D - Freezing % changes
	Excited	Inhibited	No Changes
Odor + Conflict (PLGLUT)	5.55556	8.33333	86.1111
Odor + Conflict (PLGABA)	5.7971	5.7971	88.4058

## Sheet: E - Avoidance % changes
	Excited	Inhibited	No Changes
Odor + Conflict (PLGLUT)	2.77778	16.6667	80.5556
Odor + Conflict (PLGABA)	15.942	14.4927	69.5652

## Sheet: F - Risk Assess % changes
	Excited	Inhibited	No Changes
Odor + Conflict (PLGLUT)	5.55556	2.77778	91.6667
Odor + Conflict (PLGABA)	7.24638	5.7971	86.9565
