# Supplementary material for: Neural correlates and determinants of approach–avoidance conflict in the prelimbic prefrontal cortex
Source: eLife. 2021 Dec 16;10:e74950. doi: 10.7554/eLife.74950 (PMC8853658; doi:10.7554/eLife.74950)
Supplement: Figure 5—source data 1. [file elife-74950-fig5-data1.xlsx]

## Sheet: 5B - Glut zscore
Time	Time course
-20	0.645904
	0.645904
	-0.26596
	1.10184
	-1.17782
	0.645904
	-0.26596
	0.189972
	2.0137
	0.189972
	-0.72189
	-0.26596
	-0.26596
	1.55777
	-1.17782
	-0.26596
	-0.72189
	0.189972
	0.645904
	-1.17782
0	-0.26596
	1.10184
	7.48488
	8.85268
	13.8679
	17.5154
	11.5883
	8.39675
	8.39675
	11.5883
	5.20522
	1.10184
	-0.72189
	-0.72189
	0.189972
	0.645904
	-0.26596
	-0.72189
	-1.17782
	-1.17782
20	-1.17782
15
30 sec

## Sheet: 5C - Glut neurons
Time	Time course
1	1
	10
	9
	8
	4
	4
	2
	0
	0
	0
	1
12	1
	0
	1
	0
	0
	2
	0
	0
	0
	0
	0
	0
24	0
	0
	0
	0
	0
	0
	0
	0
	0
	0
	0
	0
36	0
	0
	0
	0
	0
	0
	0
	1
	0
	0
	1
	0
48	0
	0
	0
30 sec

## Sheet: 5D - Freq Glut example
Time	Time course
-20	6
	2
	2
	2
	2
	2
	0
	2
	2
	6
	4
	0
	2
	0
	4
	6
	4
	4
	2
	4
0	2
	30
	148
	88
	72
	60
	76
	46
	18
	16
	14
	10
	20
	20
	6
	16
	4
	8
	12
	6
20	4
15
30 sec

## Sheet: 5F - GABA zscore
Time	Time course
-20	-0.2708
	-1.08321
	-0.2708
	0.541603
	-1.08321
	-0.2708
	-1.08321
	-1.08321
	0.541603
	-0.2708
	1.35401
	-1.08321
	0.541603
	1.35401
	-1.08321
	-0.2708
	-1.08321
	-1.08321
	-0.2708
	1.35401
0	0.541603
	2.97881
	7.85324
	5.41603
	9.47804
	2.16641
	0.541603
	0.541603
	-0.2708
	-1.08321
	0.541603
	-1.08321
	-1.08321
	-0.2708
	-1.08321
	-1.08321
	0.541603
	-0.2708
	-1.08321
	-1.08321
20	-1.08321
15
30 sec

## Sheet: 5G - GABA neurons
Time	Time course
	13
	28
	19
	12
	7
	0
	3
	0
	1
	1
	0
12	0
	0
	2
	1
	0
	0
	1
	1
	0
	0
	0
	1
	2
	0
	2
	0
	3
	0
	1
	1
	2
	0
	2
	1
	1
	1
	3
	1
	1
	1
	1
	1
	1
	1
	1
48	1
	2
	0
	1
	3
	0
	1
	0
	0
	1
	2
	0
	0
	3
	0
	1
	4
	5
	0
	0
	0
	0
	1
	2
	2
	1
	1
	2
	0
	0
	3
	0
	1
	1
	1
	0
	1
	1
	0
	1
	1
	0
	0
	1
	0
	1
	1
	1
96	0
	0
	0
	0
	0
	0
	0
	0
	0
	0
	0
15
30 sec

## Sheet: 5H - Freq GABA example
Time	Time course
-20	4
	2
	4
	8
	6
	2
	0
	4
	2
	2
	0
	2
	2
	4
	6
	2
	0
	8
	4
	4
0	0
	16
	98
	48
	18
	8
	34
	20
	0
	0
	0
	0
	0
	0
	0
	0
	0
	0
	0
	0
20	0
15
30 sec

## Sheet: 5J - Glut changes food cue resp
	Excited	Inhibited during Reward	No change
Reward	8	0	92
Conflict	6	8	86

## Sheet: 5K - GABA changes food cue resp
	Excited	Inhibited during Reward	No change
Reward	12	7	81
Conflict	12	12	76

## Sheet: 5M - Avg Glut firing rate
Baseline	Reward	Odor	Conflict
12	10.9	9.53333	12.0333
12.0667	11.4667	11.8	12.8333
2.53333	1.5	2.36667	1.76667
2.46667	4.26667	4.1	3.16667
4.2	3.36667	2.8	2.13333
4.56667	6.3	6.2	4.33333
3.26667	5.63333	3.76667	2.5
1.46667	1.63333	2.73333	2.66667
1.2	1.23333	5.53333	1.3
3.66667	3.8	4.2	5.7
6.33333	5.46667	5.73333	7.16667
3.76667	3.46667	3.16667	2.93333
2.86667	3.46667	3.53333	2.86667
14.7	16.3333	15.2333	14.6667
7.63333	5.33333	9.86667	5.86667
3.16667	0.433333	0.4	0.866667
0.766667	0.733333	1.23333	0.766667
2.5	0.966667	1.06667	0.7
0.833333	0.866667	0.033333	0
3.83333	2.73333	3.53333	2.53333
4.16667	4.43333	3.26667	4.7
4.6	2.46667	3.43333	5.10345
10.6	4.26667	7.93333	2.58621
2.9	1.63333	2.4	3.82759
3.3	2.7	2.4	1.72414
0.866667	1.56667	1.23333	2.34483
3.86667	2.66667	3.63333	2.24138
6.46667	7.23333	6.73333	3.27586
5.26667	5.33333	5.13333	8.58621
2.56667	2.53333	2.93333	4.44828
4.06667	4.03333	4.56667	2.34483
5.13333	4.86667	4.93333	3.86207
3.76667	4.5	7.6	5.27586
12.1333	16	15.0667	4.44828
6.16667	4.16667	4.6	9.75862
3.3	2.13333	0.966667	6.55172
4.53333	3.53333	2.8	2.03448
18.7333	16.7333	19.3333	6.2069
6.4	7.46667	5.8	16.5862
5.13333	6.9	6.96667	2.24138
17.2333	11.4	7.06667	4.2069
7.63333	11.7333	12.6333	5.96552
0.266667	0.4	0.3	1.58621
7.86667	8.1	8.3	10.2414
2.76667	3.73333	6.63333	1.10345
5.9	5.86667	7.4	4.82759
6.6	4.1	3.46667	1.48276
0.5	1	0.8	2.42857
0.4	1.1	4.73333	2
2.43333	2.66667	3	1.03571
5.26667	7.36667	3	21.2857
1.06667	1.86667	3.16667	4.07143
2.6	1.8	1.56667	6.64286
1.06667	0.466667	2.26667	1.75
21.7667	21.2	20.3	2.46429
17.2	16.3	12.5667	16.4643
32.1	38.8	36.9	9.46429
4.53333	3.3	2.6	37.7143
9.33333	12.7667	13.3667	1.78571
5.63333	5.4	5.5	15.3571
3.76667	6.33333	5.46667	3.82143
8.16667	7.36667	9.3	2.21429
2.06667	3.6	4.63333	0.714286
0.3	0.6	1.23333	6.25
4.06667	13.5667	26.3	6.53571
8.46667	12.4	14.3333	4.03571
3.8	4.9	4.2	2
8.93333	8.16667	7.33333	4.25
3.06667	2.06667	2.9	5.92857
0.066667	0	0.333333	4.89286
3.23333	3.9	1.96667	2.03571
2.03333	0.9	1.66667	2.85714
4.9	2.7	2.7	1.57143
2.16667	1.1	1.9	1.10714
0.033333	0	0	2.21429
3.7	2.93333	5.8	8.92857

## Sheet: 5N - Perc responsive neurons Gl
	Percentage	Number of cells
Reward	11	8
Odor	7	5
Conflict	25	17
Rew-Odor	4	3
Rew-Confl	21	14
Odor-Confl	14	10
R-O-C	18	12
Neurons responding in all the phases with detected events in all phases	69

[truncated: 4 more sheets: 5O - Glut % change spont, 5P - GABA firing rate, 5Q - Perc responsive neurons GA, 5R - GABA % change spont]
