# Supplementary material for: Neural correlates and determinants of approach–avoidance conflict in the prelimbic prefrontal cortex
Source: eLife. 2021 Dec 16;10:e74950. doi: 10.7554/eLife.74950 (PMC8853658; doi:10.7554/eLife.74950)
Supplement: Figure 6—source data 1. [file elife-74950-fig6-data1.xlsx]

## Sheet: 6B - Percent Glut Photoactivati
	Percentage	Nr neurons
Excited	45	9
Inhibited	30	6
No change	25	5
Neurons	20

## Sheet: 6C - Exc Zscore GLUT
Time	Time course	SEM
-2	-0.19761	0.312706
	-0.18097	0.218838
	-0.21264	0.228753
	-0.45665	0.351603
	-0.43998	0.337544
	-0.31357	0.307932
	-0.14734	0.354466
	-0.46329	0.226905
	-0.31876	0.396342
	0.891967	0.382952
0	3.12451	0.743173
	4.6998	1.27168
	5.44128	1.38915
	5.05872	1.33475
	5.33242	1.47212
	5.50556	1.69743
	5.84985	1.58477
	6.09745	1.71339
	5.83293	1.6962
	5.44196	2.01697
2	3.43369	1.90501
	2.13765	1.95258
	1.39363	2.16804
	1.6359	2.17028
	2.09403	2.04199
	1.53563	1.85736
	1.47731	1.72648
	0.924268	1.8535
	1.01503	1.74678
	1.22228	1.85108
4	1.25961	1.62457
20

## Sheet: 6D - Exc Freq GLUT
Time	Time course
-2	2.58333
	2.83333
	2.58333
	2.41667
	2.83333
	2.75
	3.5
	2.66667
	3.25
	3.41667
0	5.25
	5.91667
	6.83333
	6.33333
	6.5
	6.5
	6.83333
	7.5
	6.58333
	5.83333
2	3.91667
	3.75
	2.83333
	3.5
	3.41667
	3.91667
	3.25
	2.75
	2.5
	2.08333
4	2.25
20

## Sheet: 6F - Percent GABA Photoactivati
	Percentage	Nr neurons
Excited	0	0
Inhibited	73	15
No change	27	7
Neurons	22

## Sheet: 6G - Inh Zscore GABA
Time	Time course	SEM
-5	0.260896	0.122576
	0.229303	0.153639
	0.432022	0.159135
	0.261579	0.199911
	-2.0715	0.144992
0	-4.79712	0.341048
	-7.52736	0.642391
	-8.24655	0.73191
	-8.74309	0.793417
	-9.31264	0.836177
5	-9.72827	0.896294
	-9.97389	0.948764
	-9.93904	0.948709
	-9.61118	0.967652
	-5.65589	0.59644
10	-2.12378	0.452172
	0.932953	0.718595
	0.462873	0.792749
	0.282353	0.785866
	0.440693	0.765801
20

## Sheet: 6H - Inh Freq GABA
Time	Time course
-5	17.8333
	19.0667
	20.5
	20.6
	17.4667
0	13.25
	8
	5.25
	3.03333
	1.13333
5	0.6
	0.533333
	0.566667
	0.483333
	0.6
10	15.5
	22.2833
	21.8167
	20.3833
	20.0833
20

## Sheet: 6M - Presses laser resp
	CaMKII-ChR2	CaMKII-ChR2	CaMKII-ChR2	CaMKII-ChR2	CaMKII-ChR2	CaMKII-ChR2	CaMKII-ChR2					DLX-ChR2	DLX-ChR2	DLX-ChR2	DLX-ChR2	DLX-ChR2	DLX-ChR2	DLX-ChR2	DLX-ChR2	DLX-ChR2	DLX-ChR2	DLX-ChR2	DLX-ChR2	DLX-ChR2	DLX-ChR2	DLX-ChR2	DLX-ChR2	DLX-ChR2	Control	Control	Control	Control	Control	Control	Control	Control	Control	Control	Control	Control	Control	Control	Control
	1T3	2T3	3T3	5T3	6T3	7T3	8T3					2R2	6R2	7R2	1Z2	3Z2	6Z2	1F3	4F3	5F3	7F3	9F3	1G3	2G3	1U3	2U3	9T3	10T3	6G3	8G3	9G3	10G3	9Z2	7Z2	8Z2	10Z2	3U3	4U3	5U3	6U3	4I4	5I4	6I4
OFF	19	17	25	27	24	33	22					20	15	14	16	15	12	10	16	27	11	19	29	22	13	18	27	29	19	30	17	20	27	14	24	22	37	34	19	31	22	30	30
ON	18	10	0	0	0	17	0					18	28	16	17	13	16	9	11	29	10	14	26	23	12	24	31	20	16	20	18	16	25	20	21	20	31	30	18	25	19	18	34
OFF	18	24	23	25	8	29	22					20	23	17	20	19	14	11	15	29	8	25	27	23	14	25	22	25	20	21	21	22	24	22	25	21	35	33	16	6	20	25	17
ON	12	9	25	7	0	0	0					21	25	19	24	15	17	13	16	27	8	19	23	21	16	25	24	20	18	28	21	12	22	17	22	21	27	33	13	30	26	23	25
OFF	20	17	18	18	0	20	18					20	25	0	25	20	15	7	15	22	6	22	25	20	15	25	29	21	19	23	22	20	24	18	20	19	30	32	16	29	9	15	32
ON	18	19	23	13	3	0	0					19	24	14	18	17	23	10	17	23	12	19	20	20	13	17	29	10	12	23	22	19	23	15	19	22	27	31	12	24	19	26	22

## Sheet: 6N - Latency laser resp
	CaMKII-ChR2	CaMKII-ChR2	CaMKII-ChR2	CaMKII-ChR2	CaMKII-ChR2	CaMKII-ChR2	CaMKII-ChR2					DLX-ChR2	DLX-ChR2	DLX-ChR2	DLX-ChR2	DLX-ChR2	DLX-ChR2	DLX-ChR2	DLX-ChR2	DLX-ChR2	DLX-ChR2	DLX-ChR2	DLX-ChR2	DLX-ChR2	DLX-ChR2	DLX-ChR2	DLX-ChR2	DLX-ChR2	Control	Control	Control	Control	Control	Control	Control	Control	Control	Control	Control	Control	Control	Control	Control
	1T3	2T3	3T3	5T3	6T3	7T3	8T3					2R2	6R2	7R2	1Z2	3Z2	6Z2	1F3	4F3	5F3	7F3	9F3	1G3	2G3	1U3	2U3	9T3	10T3	6G3	8G3	9G3	10G3	9Z2	7Z2	8Z2	10Z2	3U3	4U3	5U3	6U3	4I4	5I4	6I4
OFF	3.3	2.9	4.15	1.85	5.4	2.2	1.25					2.85	4.7	3.8	8.4	4.2	6.4	10	7.75	3.8	8.35	4.95	1.7	4.7	3.6	3.55	10.25	3.5	6.15	5.9	4.5	6.3	2.9	5.45	4	1.75	13.55	2.3	1.8	5.55	4.3	2.75	2.5
ON	2.65	15.6	30	30	30	18.25	30					2.95	2.15	6.45	4.2	4.3	6.4	6.45	7	3.1	11.55	2.75	4.8	5.15	2.85	7.35	6.75	7.45	4.85	3.6	6.2	9.55	2.15	6.5	2.75	2.3	3.1	2	1.45	2.45	2.25	5.75	2.6
OFF	3.05	1.85	3.1	2.7	3.65	4.3	5.2					2.7	2.9	4.1	4.95	1	1.3	3.45	3.15	2.55	16.45	3.55	4.75	2.8	2.85	4.65	2.1	24.8	2.25	2.75	5.45	3.65	2.9	3.55	3.3	2.55	3.4	13.05	2.65	17.35	2.6	2.5	2.15
ON	12.15	15.35	2.85	16.4	30	30	30					2.6	1.8	1.75	3.65	3.9	2.4	2.3	5.1	3.45	16	6.25	3.4	6.55	3.2	3.45	9.8	2.95	5.25	1.3	3.15	13.35	4.75	4.15	4.75	4.1	3.95	1.55	1.6	1.4	5.85	4.65	2.75
OFF	3.05	8.05	9.05	11.3	30	4.85	2.15					4.65	3.3	30	3.75	2.4	3.65	3.2	4.25	3	21	3.95	3.65	2.05	2	2.5	2.4	5.25	2.8	1.95	2.2	5	2.5	2.7	2.9	3.6	2.65	1.95	3	3.9	5.45	16.2	1.75
ON	2.05	4.2	3.5	17	19.75	30	30					5.75	2.25	8.45	3.25	2.1	1.1	2.9	3	3.15	5.7	4.4	6.75	4.4	1.8	3.3	3.9	3.3	10.1	7.15	0.3	2.6	3.75	2.2	5.65	3.35	2.3	2.15	2.45	3.5	3.65	3.7	4.35

## Sheet: 6O - Freezing laser resp
	CaMKII-ChR2	CaMKII-ChR2	CaMKII-ChR2	CaMKII-ChR2	CaMKII-ChR2	CaMKII-ChR2	CaMKII-ChR2					DLX-ChR2	DLX-ChR2	DLX-ChR2	DLX-ChR2	DLX-ChR2	DLX-ChR2	DLX-ChR2	DLX-ChR2	DLX-ChR2	DLX-ChR2	DLX-ChR2	DLX-ChR2	DLX-ChR2	DLX-ChR2	DLX-ChR2	DLX-ChR2	DLX-ChR2	Control	Control	Control	Control	Control	Control	Control	Control	Control	Control	Control	Control	Control	Control	Control
	1T3	2T3	3T3	5T3	6T3	7T3	8T3					2R2	6R2	7R2	1Z2	3Z2	6Z2	1F3	4F3	5F3	7F3	9F3	1G3	2G3	1U3	2U3	9T3	10T3	6G3	8G3	9G3	10G3	9Z2	7Z2	8Z2	10Z2	3U3	4U3	5U3	6U3	4I4	5I4	6I4
OFF	0	0	0	0	0	0	0					0	0	0	0	0	0	0	0	0	0	0	7	0	0	0	0	0	0	0	0	0	0	0	0	0	0	0	0	0	0	0	0
ON	0	0	0	0	0	0	0					0	0	0	0	0	0	0	0	0	0	0	3.66667	0	0	0	0	0	0	0	0	0	0	0	0	0	0	0	0	0	0	0	0
OFF	0	0	0	0	0	0	0					0	0	0	0	0	0	0.833333	0	0	0	4.83333	5	0	0	0	1.16667	0	0	0	0	6.16667	1	0	0	0	0	0	0	0	0	0	0
ON	0	0.166667	0	0	2.66667	0	0					0	0	0	0	0	0	2.16667	0	0	0	6.33333	4.66667	0.666667	0	0	1.16667	20.1667	0	0	0	6.16667	1	0	0	0	0	0	0	0	0	0	0
OFF	0	0.166667	0	0	2.66667	1.5	0					0	0	0	0	0	0	1.33333	0	0	0	6.66667	24.6667	0.666667	0	0	0	22.1667	0	0	0	0	0	0	0	0	0	0	0	0	0	0	0
ON	0	0	0	0	6.66667	1.5	0					0	0	0	0	0	0	0	0	0	0	6.5	22.6667	0	0	0	0	2.33333	0	0	0	0	0	0	0	0	0	0	0	0	0	0	0
