# Supplementary material for: Neural correlates and determinants of approach–avoidance conflict in the prelimbic prefrontal cortex
Source: eLife. 2021 Dec 16;10:e74950. doi: 10.7554/eLife.74950 (PMC8853658; doi:10.7554/eLife.74950)
Supplement: Figure 7—figure supplement 1—source data 1. [file elife-74950-fig7-figsupp1-data1.xlsx]

## Sheet: Supp 10C - Optogenetic Presses
	CaMKII-Halo																	Control
	1H4	1I4	2H4	3H4	3I4	4H4	5H4	6H4	7H4	8H4	9H4	10H4						6G3	8G3	9G3	10G3	7Z2	8Z2	9Z2	10Z2	3U3	4U3	5U3	6U3	4I4	5I4	6I4
OFF	20	16	12	18	21	16	22	22	22	13	19	22						19	30*	17	20	27	14	24	22	37*	34*	19	31	22	30	30
ON	10	32	18	21	22	19	18	19	14	20	20	19						16	20*	18	16	25	20	21	20	31*	30*	18	25	19	18	34
OFF	20	26	22	23	22	16	17	21	21	30	19	13						20	21*	21	22	24	22	25	21	35*	33*	16	6	20	25	17
ON	17	18	24	25	28	19	21	21	21	14	19	24						18	28*	21	12	22	17	22	21	27*	33*	13	30	26	23	25
OFF	25	24	21	25	23	14	17	19	12	20	17	12						19	23*	22	20	24	18	20	19	30*	32*	16	29	9	15	32
ON	17	22	25	20	26	17	21	23	22	19	20	16						12	23*	22	19	23	15	19	22	27*	31*	12	24	19	26	22

## Sheet: Supp 10D - Optogenetic Latency
	CaMKII-ChR2																	Control
OFF	1.8	2.7	13.8	6.45	3.8	1.15	8.1	4.05	0.85	5.3	10.9	3						2.9	5.45*	4	1.75	6.15	5.9	4.5	6.3	6.3*	6.7*	1.95	4.55	2.6	2.5	2.15
ON	16.25	2.5	4.2	7.35	2.4	2.75	6.1	4.25	9.05	6.9	5.8	2.05						2.15	6.5*	2.75	2.3	4.85	3.6	6.2	9.55	3.8*	4.4*	7.35	1.95	5.85	4.65	2.75
OFF	6.05	1.7	4.3	5.9	2.5	5.85	4.55	3.5	4.95	2.95	6.6	3.45						2.9	3.55*	3.3	2.55	2.25	2.75	5.45	3.65	2.45*	2.5*	3.2	1.55	5.45	16.2	1.75
ON	8.85	3.75	1.25	4.3	1.7	3.4	5.65	1.7	5.15	2.25	7.85	2.65						4.75	4.15*	4.75	4.1	5.25	1.3	3.15	13.35	4.05*	2.35*	1.7	2.6	3.65	3.7	4.35
OFF	3	1.35	0.8	5.15	2.45	7.3	5.75	2.7	12.65	1.8	3.1	2.6						2.5	2.7*	2.9	3.6	2.8	1.95	2.2	5	3.05*	2.9*	3.8	3.65	2.7	2.9	4.8
ON	5.15	4.45	4.9	2.25	2.6	6.35	5.45	4.05	5	3.7	6.25	4.15						3.75	2.2*	5.65	3.35	10.1	7.15	0.3	2.6	3.3*	2.35*	16.85	1.5	6.6	4.6	2.95

## Sheet: Supp 10E - Optogenetic Freezing
	CaMKII-ChR2																	Control
	1H4	1I4	2H4	3H4	3I4	4H4	5H4	6H4	7H4	8H4	9H4	10H4						6G3	8G3	9G3	10G3	9Z2	7Z2	8Z2	10Z2	3U3	4U3	5U3	6U3	4I4	5I4	6I4
OFF	0	0	0	0	0	0	0	0	0	0	0	0						0	0*	0	0	0	0	0	0	0*	0*	0	0	0	0	0
ON	0	0	0	0	0	0	0	0	0	0	0	0						0	0*	0	0	0	0	0	0	0*	0*	0	0	0	0	0
OFF	0	0	0	0	0.05	0	0	0	0	0	0	0						0	0*	0	6.16667	1	0	0	0	0*	0*	0	0	0	0	0
ON	0	0	0	0	0	0	0	0	0	0	0	0						0	0*	0	6.16667	1	0	0	0	0*	0*	0	0	0	0	0
OFF	0	0	0	0	0	0	0	0	0	0	0.55	0						0	0*	0	0	0	0	0	0	0*	0*	0	0	0	0	0
ON	0	0	0	0	0	0	0	0	0	0	0	0						0	0*	0	0	0	0	0	0	0*	0*	0	0	0	0	0
