# Supplementary material for: Neural correlates and determinants of approach–avoidance conflict in the prelimbic prefrontal cortex
Source: eLife. 2021 Dec 16;10:e74950. doi: 10.7554/eLife.74950 (PMC8853658; doi:10.7554/eLife.74950)
Supplement: Figure 7—figure supplement 2—source data 1. [file elife-74950-fig7-figsupp2-data1.xlsx]

## Sheet: D - Optogenetic Freezing
	Control										DLX-ChR2-mCherry
	6G3	8G3	9G3	10G3	9Z2						2G3	3F3	4F3	7F3	9F3	2R2	3Z2	6Z2
OFF	0.25	6.16667	0	13.6667	9.66667					OFF	0	3.08333	2.91667	8.08333	0	0	0	0
ON	1.83333	5.83333	0.916667	4.33333	0					ON	0.0833333	4.16667	4.08333	1.25	0	0	4.58333	1.75

## Sheet: E - Optogenetic Avoidanc
	Control										DLX-ChR2-mCherry
	6G3	8G3	9G3	10G3	9Z2						2G3	3F3	4F3	7F3	9F3	2R2	3Z2	6Z2
OFF	34	45.5	14.0833	37.3333	65.0833					OFF	1.5	13.1667	50	21.9167	50.6667	42.1667	49.1667	64.4167
ON	31.25	21.0833	16.0833	17.75	37.5					ON	39.0833	23.3333	50	10.1667	16.0833	10.5	45.9167	73.0833

## Sheet: F - Optogenetic Approach
	Control										DLX-ChR2-mCherry
	6G3	8G3	9G3	10G3	9Z2						2G3	3F3	4F3	7F3	9F3	2R2	3Z2	6Z2
OFF	37.6667	27.4167	33	36.5	24.75					OFF	37.6667	19.3333	17.4167	61.1667	26.6667	36.6667	15.0833	16.6667
ON	11.5833	50	23.0833	44.4167	26.1667					ON	28.25	34.6667	46.75	51.75	40.5833	57.25	41.5	22.6667

## Sheet: G - Optogenetic Presses
	Control										DLX-ChR2-mCherry
	6G3	8G3	9G3	10G3	9Z2						2G3	3F3	4F3	7F3	9F3	2R2	3Z2	6Z2
OFF	100	75	100	100	50					OFF	100	75	25	100	100	75	25	75
ON	100	75	100	100	100					ON	100	100	50	100	100	100	100	50

## Sheet: H - Optogenetic Latency
	Control										DLX-ChR2-mCherry
	6G3	8G3	9G3	10G3	9Z2						2G3	3F3	4F3	7F3	9F3	2R2	3Z2	6Z2
OFF	8.175	22.25	2.575	4.025	16.825					OFF	9.1	12.9	29.25	7.475	5.75	13.5	23.8	9.8
ON	7.35	13.85	2.85	12.475	17.05					ON	14.1	2.675	21.775	3.45	2.85	5.95	7.125	18.575
