# Supplementary material for: Neural correlates and determinants of approach–avoidance conflict in the prelimbic prefrontal cortex
Source: eLife. 2021 Dec 16;10:e74950. doi: 10.7554/eLife.74950 (PMC8853658; doi:10.7554/eLife.74950)
Supplement: Figure 7—source data 1. [file elife-74950-fig7-data1.xlsx]

## Sheet: 7D - Freezing Conflict photoinh
	Control	Control	Control	Control	Control							Halo CaMKII	Halo CaMKII	Halo CaMKII	Halo CaMKII	Halo CaMKII	Halo CaMKII	Halo CaMKII	Halo CaMKII	Halo CaMKII	Halo CaMKII	Halo CaMKII
OFF	15.9444	21.7778	50.1111	22.8333	0.666667						OFF	42.1111	24.3333	22.6111	18.7778	28.1667	23.0556	53.7778	6.94444	8.22222	8.77778	27.1667
ON	10	20.6111	63.1111	14.7222	0.611111						ON	15.8889	27.0556	7.83333	17.1111	7.16667	13.6111	38.7778	4.38889	6.11111	8.05556	12.9444

## Sheet: 7E - Avoidance Conflict photoin
	Control	Control	Control	Control	Control							Halo CaMKII	Halo CaMKII	Halo CaMKII	Halo CaMKII	Halo CaMKII	Halo CaMKII	Halo CaMKII	Halo CaMKII	Halo CaMKII	Halo CaMKII	Halo CaMKII
OFF	100	100	100	89.9444	57.5556						OFF	86.7778	100	78.7222	100	100	100	100	100	79	70.3333	100
ON	100	100	100	98.6111	79.8889						ON	74.2222	100	67.2222	100	79.9444	100	100	91.6667	69.9444	42.6667	100

## Sheet: 7F - Approach Conflict photoinh
	Control	Control	Control	Control	Control							Halo CaMKII	Halo CaMKII	Halo CaMKII	Halo CaMKII	Halo CaMKII	Halo CaMKII	Halo CaMKII	Halo CaMKII	Halo CaMKII	Halo CaMKII	Halo CaMKII
OFF	0	0	0	6.66667	32.6111						OFF	6.38889	0	13.6111	0	0	0	0	0	2.27778	23.8889	0
ON	0	0	0	0	17.1667						ON	19.0556	0	27	0	18.7222	0	0	4.33333	8.33333	48.7778	0

## Sheet: 7G - Rewarded Presses photoinh
	Control	Control	Control	Control	Control							Halo CaMKII	Halo CaMKII	Halo CaMKII	Halo CaMKII	Halo CaMKII	Halo CaMKII	Halo CaMKII	Halo CaMKII	Halo CaMKII	Halo CaMKII	Halo CaMKII
OFF	0	0	0	0	50						OFF	0	0	0	0	0	0	0	0	0	66.6667	0
ON	0	0	0	0	33.3333						ON	33.3333	0	33.3333	0	33.3333	0	0	0	0	66.6667	0

## Sheet: 7H - Latency to Presses photoin
	Control	Control	Control	Control	Control							Halo CaMKII	Halo CaMKII	Halo CaMKII	Halo CaMKII	Halo CaMKII	Halo CaMKII	Halo CaMKII	Halo CaMKII	Halo CaMKII	Halo CaMKII	Halo CaMKII
OFF	30	30	30	30	18.9167						OFF	26.0333	30	23.6167	30	30	30	30	30	30	19.6667	30
ON	30	30	30	30	25.8						ON	22.2667	30	20.1667	30	23.9833	30	30	30	30	14.5833	30

## Sheet: 7L - Freezing Conflict photoact
	Control	Control	Control	Control							DLX-ChR2-mCherry	DLX-ChR2-mCherry	DLX-ChR2-mCherry	DLX-ChR2-mCherry	DLX-ChR2-mCherry	DLX-ChR2-mCherry	DLX-ChR2-mCherry	DLX-ChR2-mCherry	DLX-ChR2-mCherry	DLX-ChR2-mCherry
OFF	5.66667	20.25	9.66667	69.0556						OFF	12.6667	13.8333	5.66667	8.83333	0	15.9167	20.2222
ON	8	10.4167	0	79.2778						ON	26.5	4.58333	4.16667	9.75	2.5	20.0833	16.3889

## Sheet: 7M - Avoidance Conflict photoac
	Control	Control	Control	Control							DLX ChR2	DLX ChR2	DLX ChR2	DLX ChR2	DLX ChR2	DLX ChR2	DLX ChR2	DLX ChR2	DLX ChR2	DLX ChR2
OFF	96.5833	99.25	89.75	100						OFF	100	100	43	89.9167	94.1667	100	100	100	0
ON	75.1667	100	90.75	100						ON	100	100	80.3333	98.1667	87.9167	100	100	100	0

## Sheet: 7N - Approach Conflict photoact
	Control	Control	Control	Control							DLX-ChR2	DLX-ChR2	DLX-ChR2	DLX-ChR2	DLX-ChR2	DLX-ChR2	DLX-ChR2	DLX-ChR2	DLX-ChR2	DLX-ChR2
OFF	0	0	0	0						OFF	0	0	45.75	3.58333	0	0	0
ON	11.6667	0	3.58333	0						ON	0	0	10	0	6.41667	0	0

## Sheet: 7O - Rewarded Presses Conflict 
	Control	Control	Control	Control							DLX-ChR2	DLX-ChR2	DLX-ChR2	DLX-ChR2	DLX-ChR2	DLX-ChR2	DLX-ChR2	DLX-ChR2	DLX-ChR2	DLX-ChR2
OFF	0	0	0	0						OFF	0	0	0	0	0	0	0
ON	0	0	0	16.6667						ON	0	0	25	0	0	0	16.6667

## Sheet: 7P - Latency to Presses Conflic
	Control	Control	Control	Control							Halo CaMKII	Halo CaMKII	Halo CaMKII	Halo CaMKII	Halo CaMKII	Halo CaMKII	Halo CaMKII	Halo CaMKII	Halo CaMKII	Halo CaMKII
OFF	30	30	30	30						OFF	30	30	30	30	30	30	30
ON	30	30	30	30						ON	30	30	23.35	30	30	30	27.5833
