# Supplementary material for: Neural correlates and determinants of approach–avoidance conflict in the prelimbic prefrontal cortex
Source: eLife journal article supplement (doi:10.7554/elife.74950), 2021-12-16

SUPPLEMENTARY FIGURE 9

Selected at 600 ms before behavioral onset

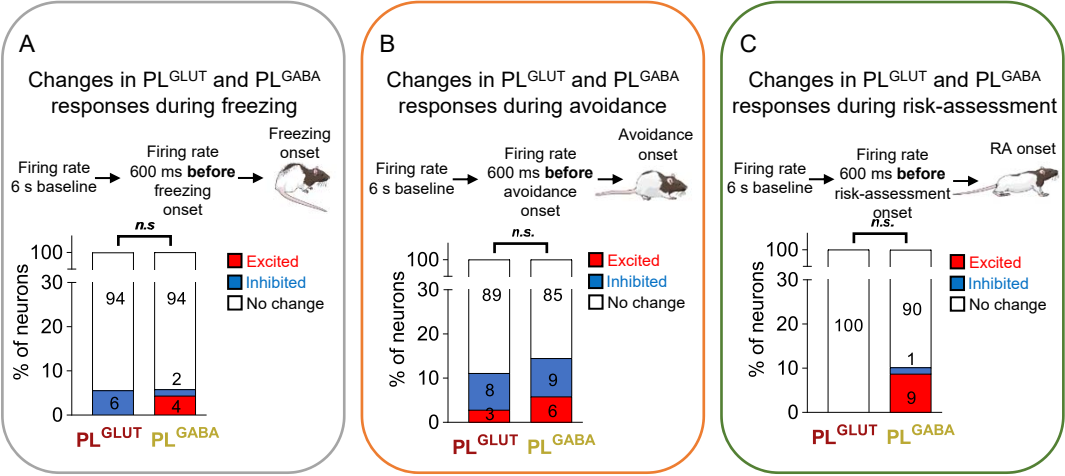

Selected at 600 ms after behavioral onset

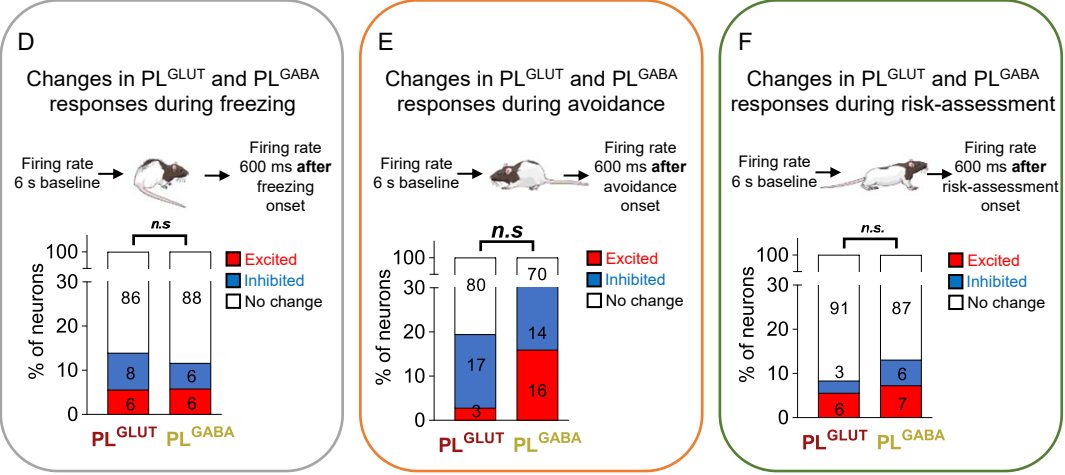

Supplement: supp [file elife-74950-supp-v1.zip]
