# Supplementary figures and images for: Neural correlates and determinants of approach–avoidance conflict in the prelimbic prefrontal cortex
Source: eLife journal article supplement (doi:10.7554/elife.74950), 2021-12-16

# SUPPLEMENTARY FIGURE 10

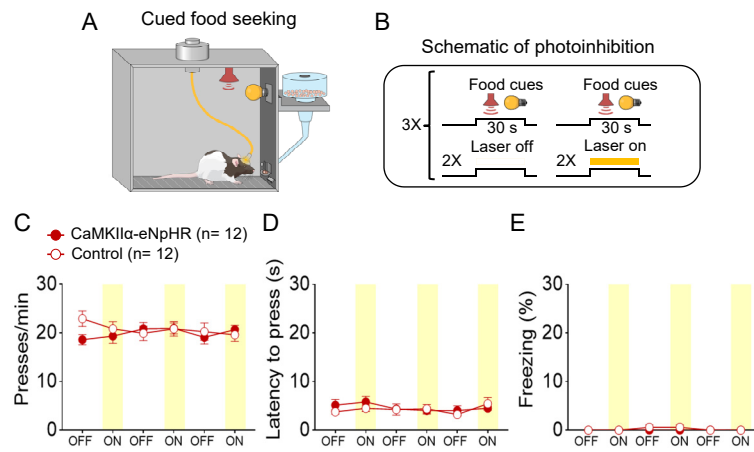

Supplement: supp [file elife-74950-supp-v1.zip]

## SUPPLEMENTARY FIGURE 2

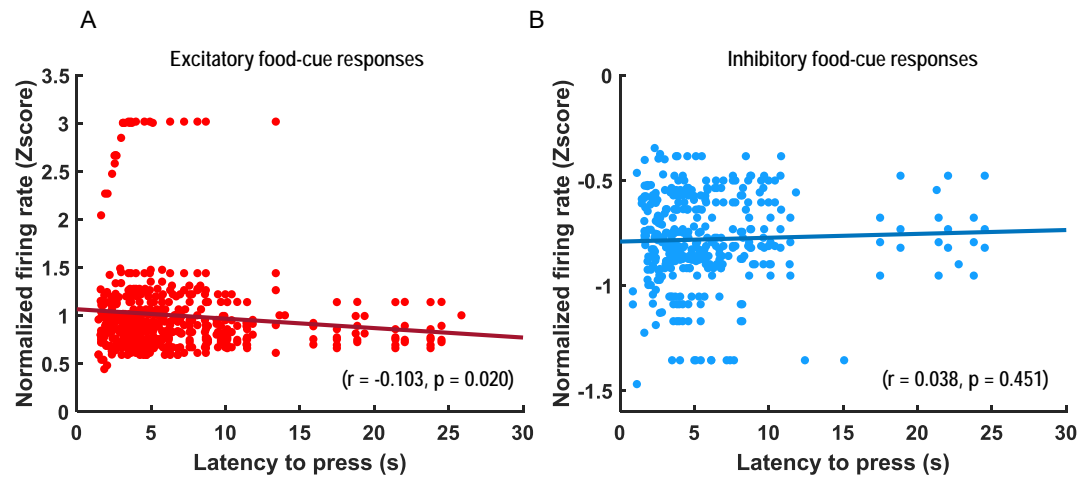

Supplement: supp [file elife-74950-supp-v1.zip]

# SUPPLEMENTARY FIGURE 11

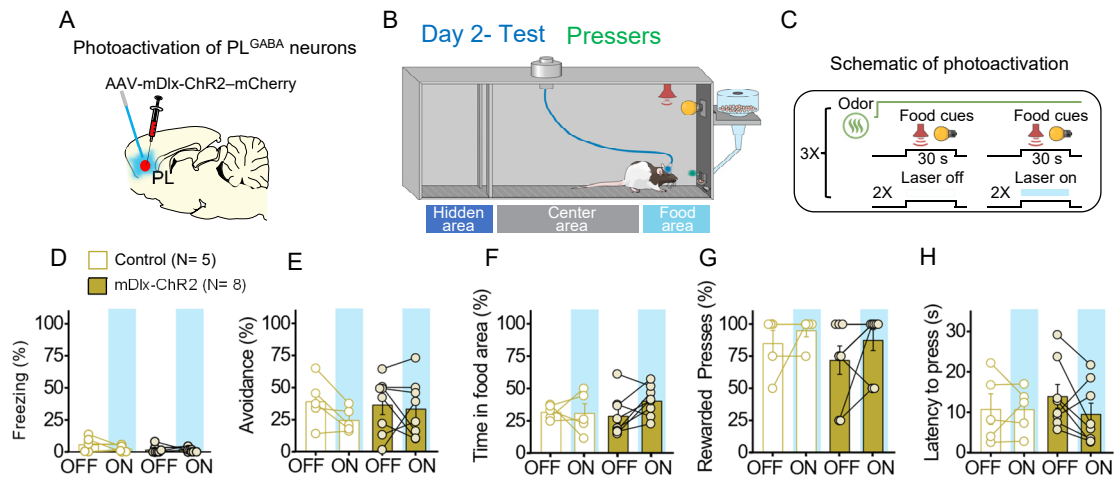

Supplement: supp [file elife-74950-supp-v1.zip]

# SUPPLEMENTARY FIGURE 8

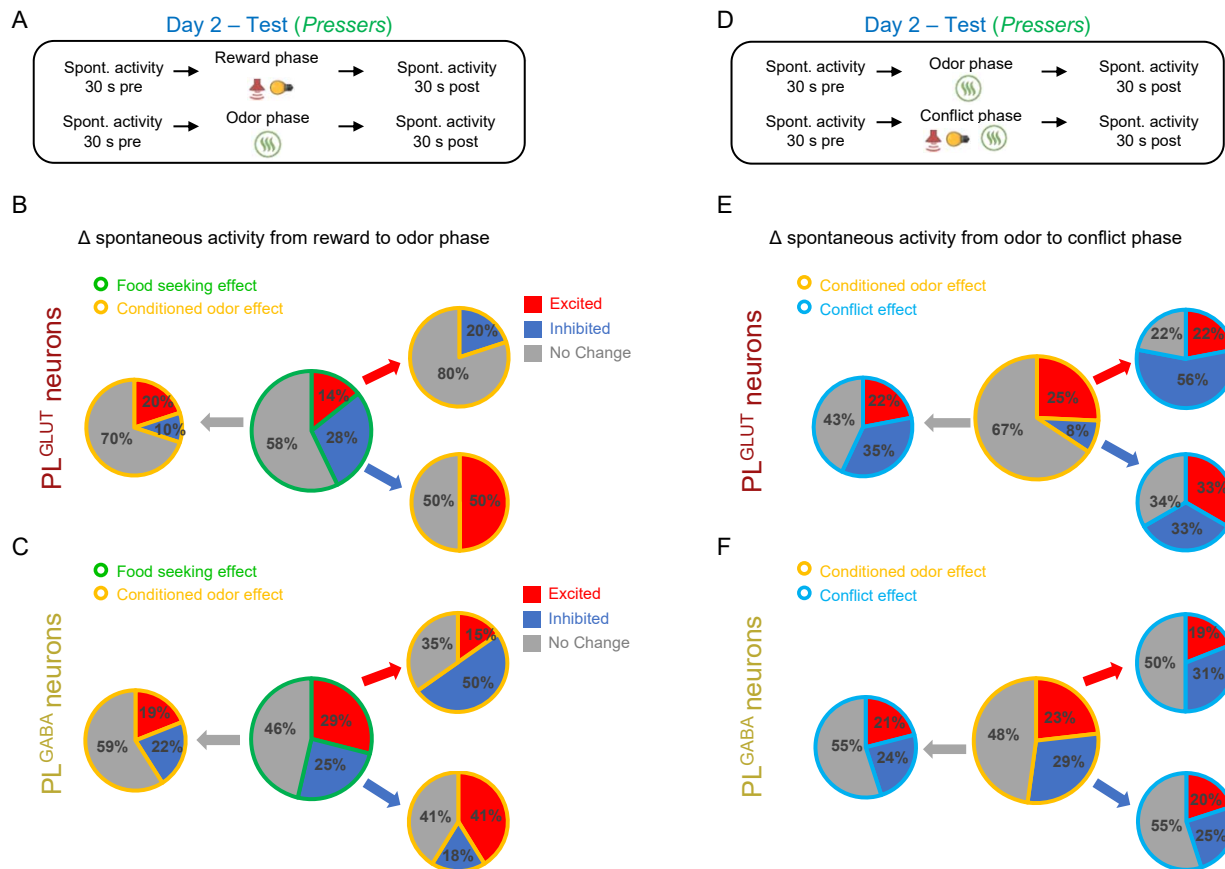

Supplement: supp [file elife-74950-supp-v1.zip]

# SUPPLEMENTARY FIGURE 1

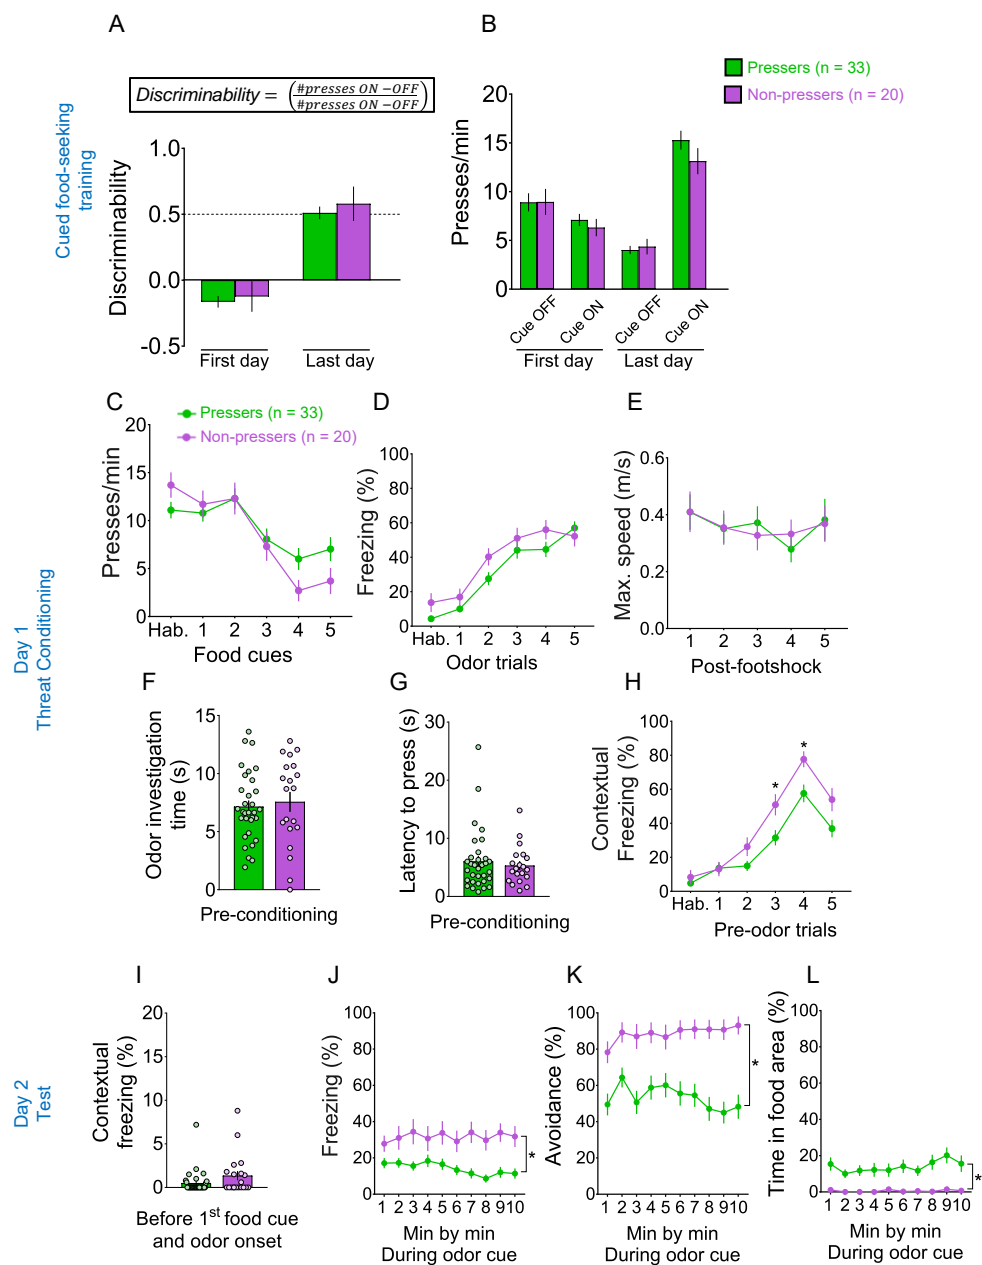

Supplement: supp [file elife-74950-supp-v1.zip]

SUPPLEMENTARY FIGURE 6

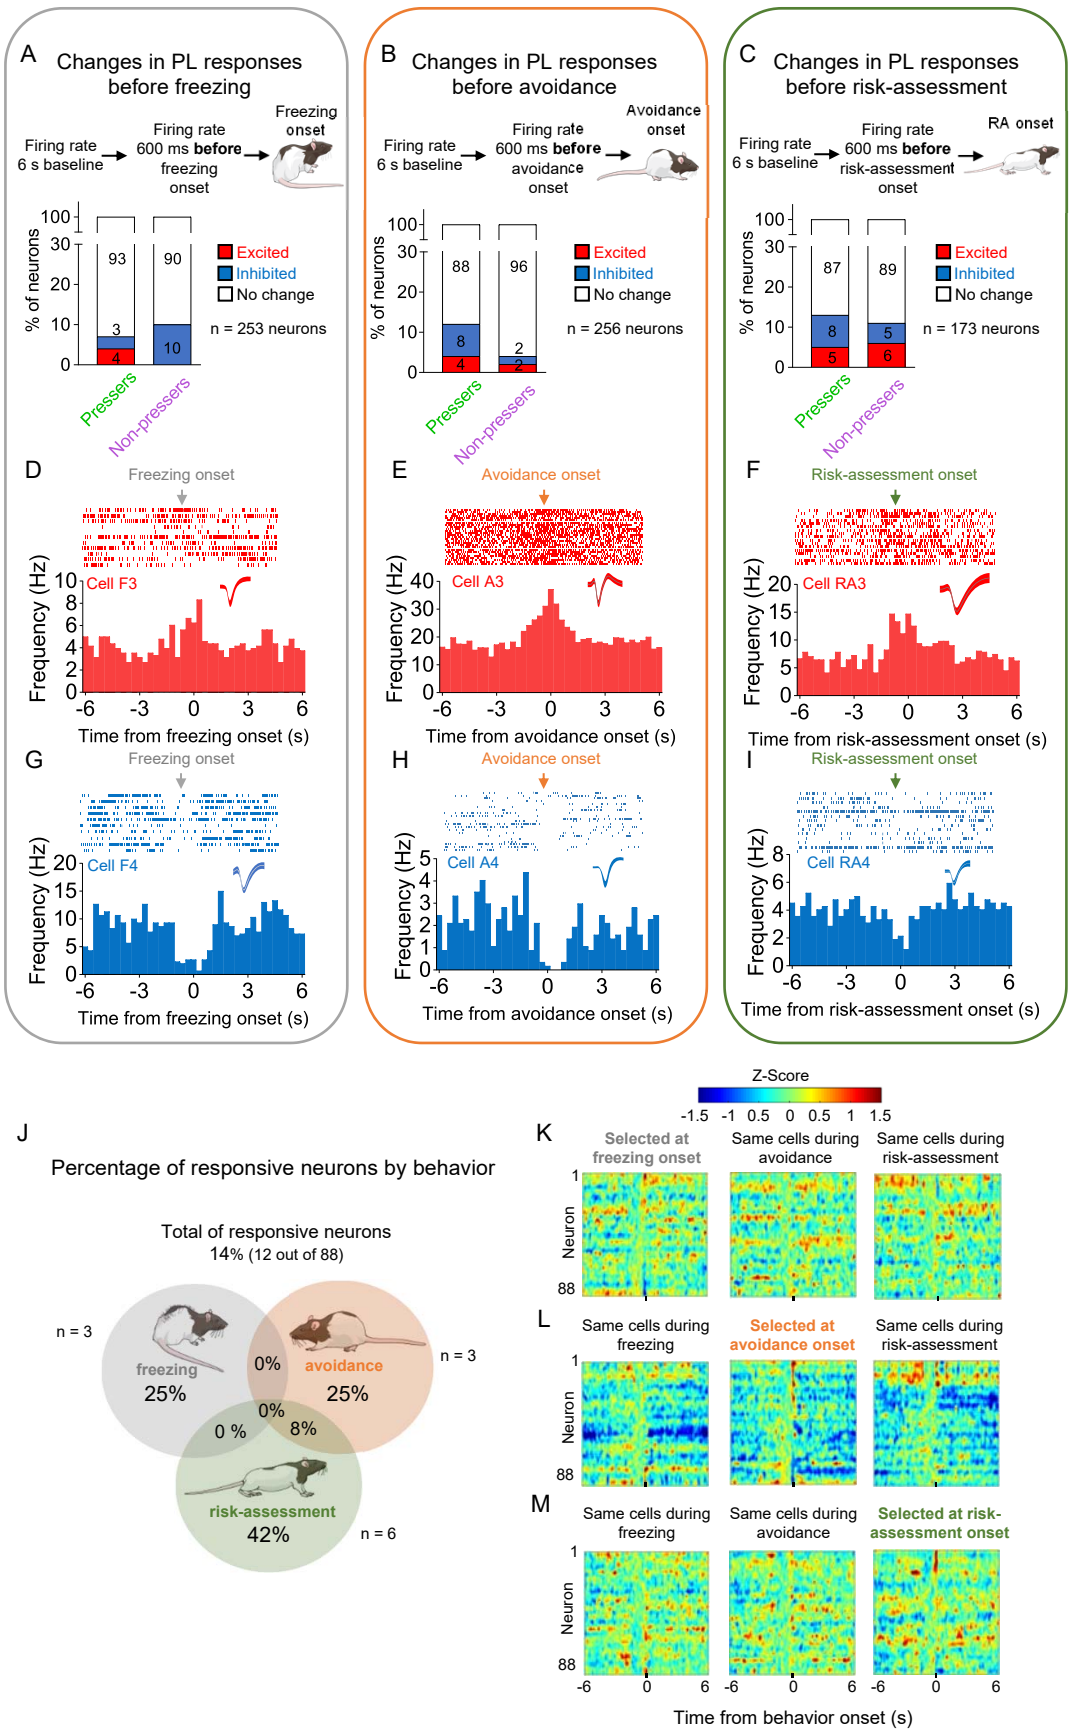

Supplement: supp [file elife-74950-supp-v1.zip]

# SUPPLEMENTARY FIGURE 3

## Pressers

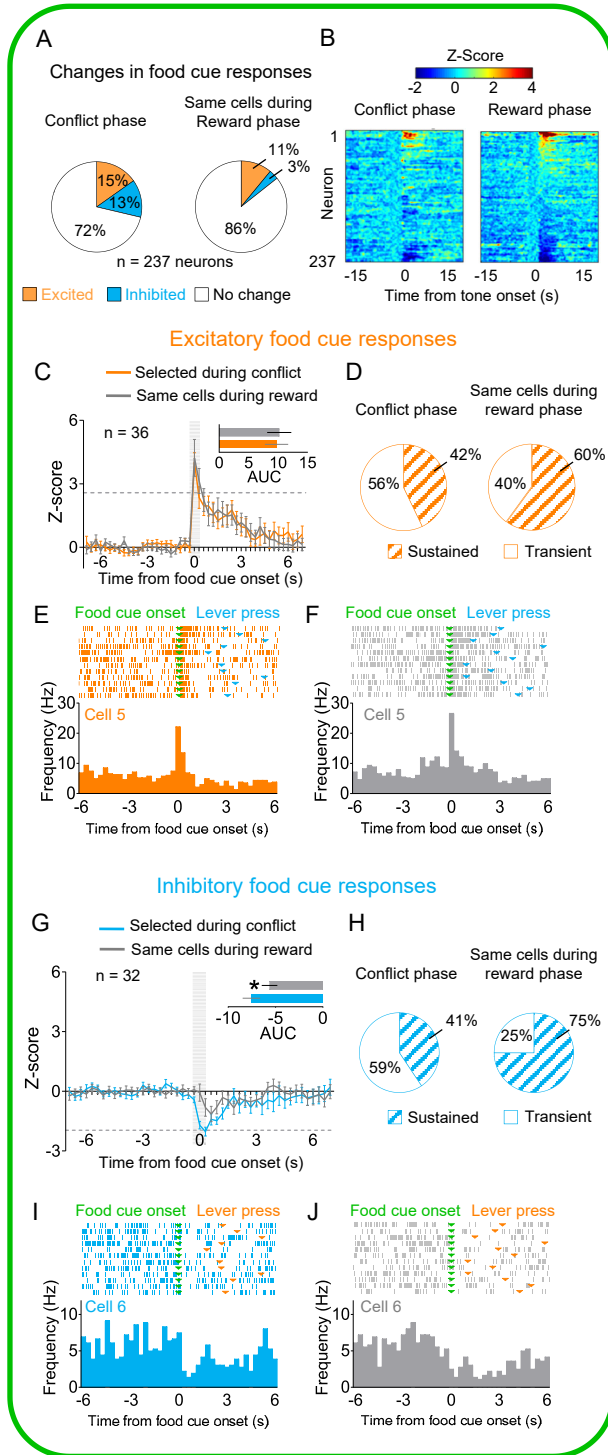

## Non-pressers

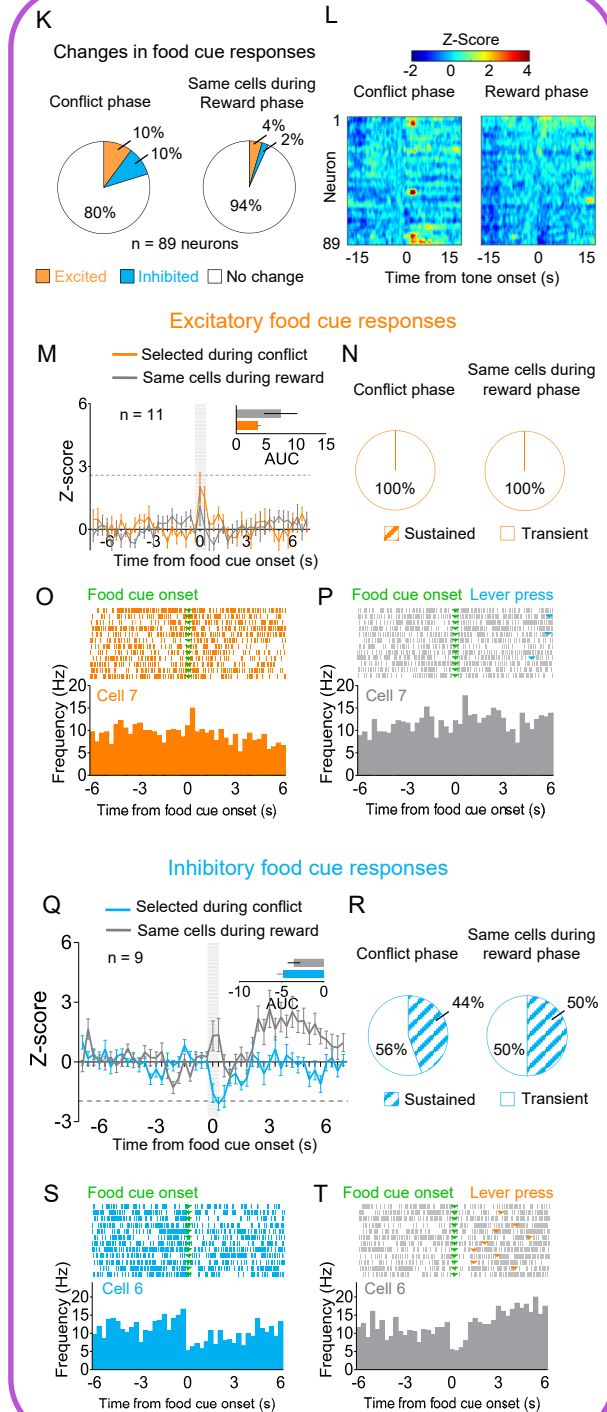

Supplement: supp [file elife-74950-supp-v1.zip]

# SUPPLEMENTARY FIGURE 5

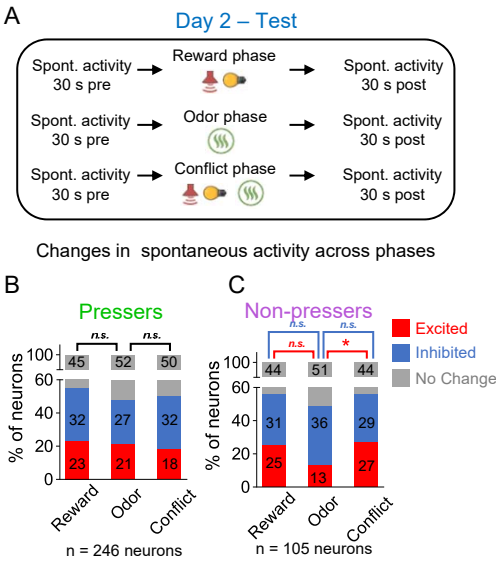

Supplement: supp [file elife-74950-supp-v1.zip]

# SUPPLEMENTARY FIGURE 4

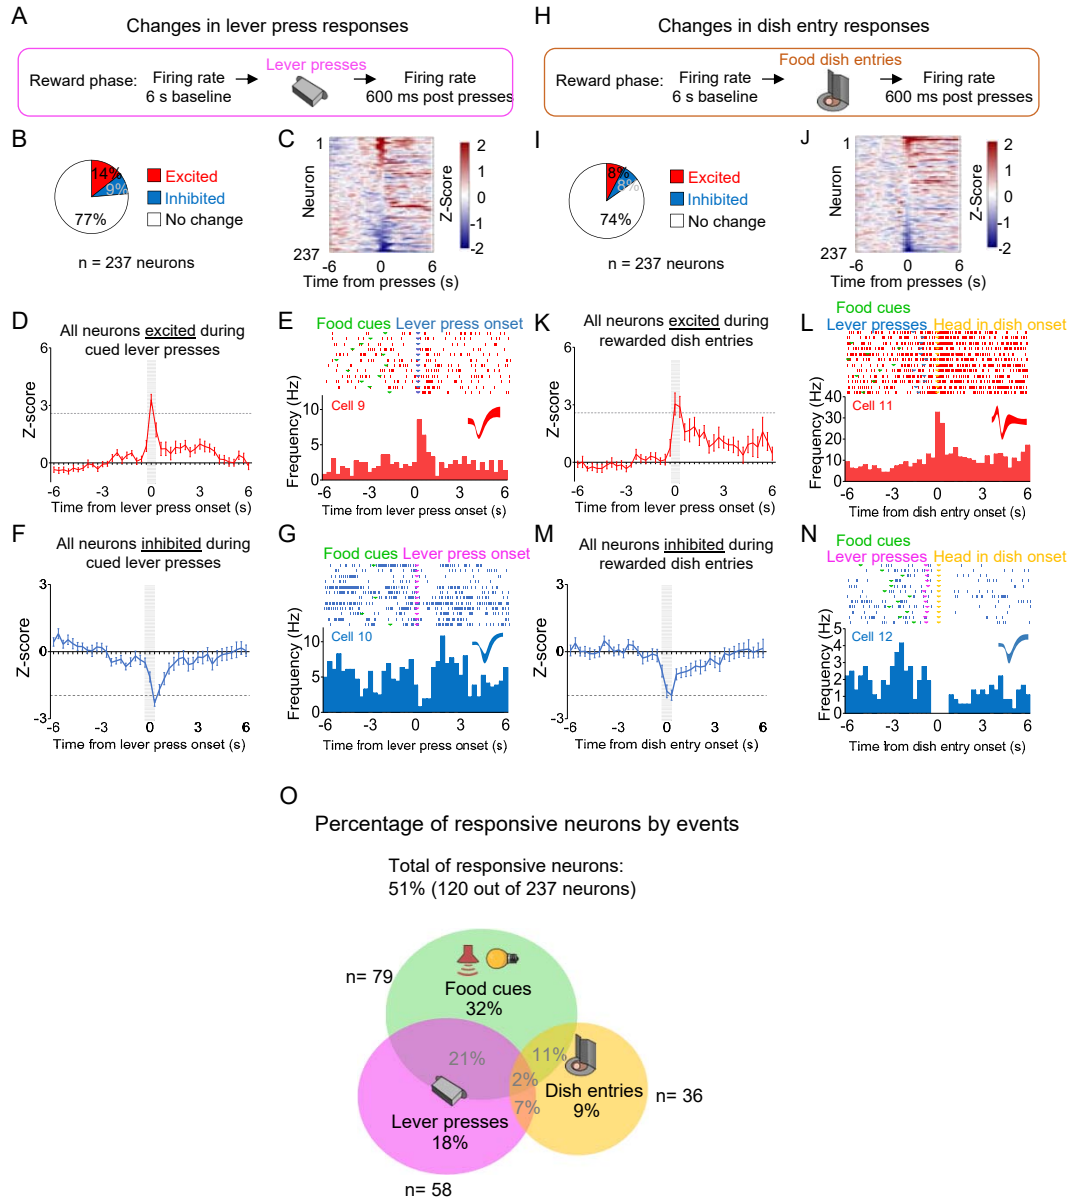

Supplement: supp [file elife-74950-supp-v1.zip]

## SUPPLEMENTARY FIGURE 7

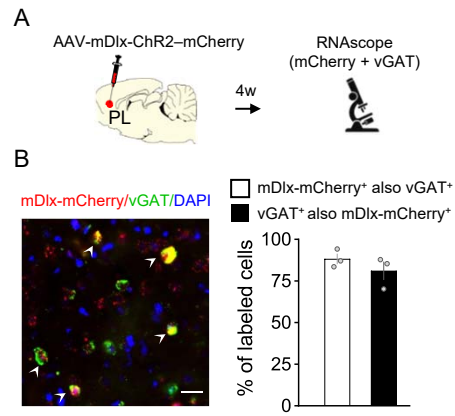

Supplement: supp [file elife-74950-supp-v1.zip]
